# Supplementary material for: Analysis of transcripts and splice isoforms in red clover (Trifolium pratense L.) by single-molecule long-read sequencing
Source: BMC Plant Biol. 2018 Nov 26;18:300. doi: 10.1186/s12870-018-1534-8 (PMC6258457; doi:10.1186/s12870-018-1534-8)
Supplement: Supplementary file 2 — Table S1. Function annotation of all corrected isoforms by SMRT. (XLSX 6767 kb) [file 12870_2018_1534_MOESM2_ESM.xlsx]

## Sheet: Red_Clover.anno.stat
Table S1. Function annotation of all corrected isoforms by SMRT
Gene_id	{nr}	{SwissProt}	{KEGG}	{KOG}	{GO}	{nt}	{pfam}
Annotation_num	190731	166618	186497	113521	80667	188149	80667
i0_HQ_c100006/f2p0/804	{GAU24558.1; hypothetical protein TSUD_148990 [Trifolium subterraneum]}	{sp|Q9LX15|DFC_ARATH; Protein DOWNSTREAM OF FLC OS=Arabidopsis thaliana GN=DFC PE=2 SV=1}	{vra:106759743; - - - - -}	{NA}	{NA}	{NA}	{NA}
i0_HQ_c100012/f2p2/333	{NA}	{NA}	{NA}	{NA}	{NA}	{XM_004490728.2; PREDICTED: Cicer arietinum UTP--glucose-1-phosphate uridylyltransferase (LOC101489484), mRNA}	{NA}
i0_HQ_c10002/f3p2/551	{GAU28482.1; hypothetical protein TSUD_294850 [Trifolium subterraneum]}	{sp|Q84WV1|TCPG_ARATH; T-complex protein 1 subunit gamma OS=Arabidopsis thaliana GN=CCT3 PE=1 SV=1}	{rcu:8260671; K09495 CCT3, TRIC5 T-complex protein 1 subunit gamma - -}	{At5g26360; KOG0364 Chaperonin complex component, TCP-1 gamma subunit (CCT3) O Posttranslational modification, protein turnover, chaperones ;}	{GO:0005524; ATP binding; molecular_function GO:0044267; cellular protein metabolic process; biological_process}	{BT141599.1; Medicago truncatula clone JCVI-FLMt-14F19 unknown mRNA}	{PF00118:TCP-1/cpn60 chaperonin family}
i0_HQ_c10004/f3p0/405	{XP_004516968.1; PREDICTED: glucan endo-1,3-beta-glucosidase [Cicer arietinum]}	{sp|Q94G86|ALL9_OLEEU; Glucan endo-1,3-beta-D-glucosidase OS=Olea europaea GN=OLE9 PE=1 SV=1}	{var:108321738; - - - - -}	{NA}	{NA}	{XM_003621982.2; Medicago truncatula glucan endo-1,3-beta-glucosidase-like protein mRNA}	{NA}
i0_HQ_c100117/f3p1/973	{AAR10886.1; chlorophyll a/b binding protein [Trifolium pratense]}	{sp|P07371|CB22_PEA; Chlorophyll a-b binding protein AB80, chloroplastic OS=Pisum sativum GN=AB80 PE=1 SV=1}	{csv:101211276; K08912 LHCB1 light-harvesting complex II chlorophyll a/b binding protein 1 - ko00196; Metabolism; Energy metabolism; Photosynthesis - antenna proteins}	{NA}	{GO:0003824; NA GO:0046872; metal ion binding; molecular_function}	{AY430082.1; Trifolium pratense chlorophyll a/b binding protein mRNA, complete cds; nuclear gene for chloroplast product}	{PF10143:2,3-bisphosphoglycerate-independent phosphoglycerate mutase}
i0_HQ_c100170/f2p7/924	{GAU25764.1; hypothetical protein TSUD_222210 [Trifolium subterraneum]}	{sp|Q8W4M5|PFPB1_ARATH; Pyrophosphate--fructose 6-phosphate 1-phosphotransferase subunit beta 1 OS=Arabidopsis thaliana GN=PFP-BETA1 PE=1 SV=1}	{cam:101514175; K00895 pfp, PFP diphosphate-dependent phosphofructokinase 2.7.1.90 ko00010; Metabolism; Carbohydrate metabolism; Glycolysis / Gluconeogenesis | ko00030; Metabolism; Carbohydrate metabolism; Pentose phosphate pathway | ko00051; Metabolism; Carbohydrate metabolism; Fructose and mannose metabolism}	{At1g12000; KOG2440 Pyrophosphate-dependent phosphofructo-1-kinase G Carbohydrate transport and metabolism ;}	{NA}	{XM_003594104.2; Medicago truncatula pyrophosphate-fructose-6-phosphate 1-phosphotransferase mRNA}	{NA}
i0_HQ_c10021/f4p5/920	{GAU21092.1; hypothetical protein TSUD_10090 [Trifolium subterraneum]}	{sp|Q08298|RD22_ARATH; BURP domain protein RD22 OS=Arabidopsis thaliana GN=RD22 PE=2 SV=1}	{gmx:100799031; - - - - -}	{NA}	{GO:0005634; nucleus; cellular_component GO:0005634; nucleus; cellular_component}	{XM_003588503.2; Medicago truncatula dehydration-responsive protein RD22 mRNA}	{PF02792:Mago nashi protein PF02792:Mago nashi protein}
i0_HQ_c100249/f2p4/791	{GAU30395.1; hypothetical protein TSUD_364410 [Trifolium subterraneum]}	{sp|Q9SSK5|MLP43_ARATH; MLP-like protein 43 OS=Arabidopsis thaliana GN=MLP43 PE=1 SV=1}	{mtr:MTR_8g045695; - - - - -}	{NA}	{GO:0006952; defense response; biological_process GO:0009607; response to biotic stimulus; biological_process}	{XM_013589792.1; Medicago truncatula polyketide cyclase/dehydrase and lipid transporter mRNA}	{PF00407:Pathogenesis-related protein Bet v I family}
i0_HQ_c100283/f3p0/634	{GAU34932.1; hypothetical protein TSUD_312630 [Trifolium subterraneum]}	{sp|Q43636|TRXH_RICCO; Thioredoxin H-type OS=Ricinus communis PE=3 SV=1}	{lang:109358402; K03671 trxA thioredoxin 1 - ko04621; Organismal Systems; Immune system; NOD-like receptor signaling pathway | ko05418; Human Diseases; Cardiovascular diseases; Fluid shear stress and atherosclerosis; lang:109358402; - - - - -}	{At3g51030; KOG0907 Thioredoxin O Posttranslational modification, protein turnover, chaperones ;}	{GO:0055114; oxidation-reduction process; biological_process GO:0007067; mitosis; biological_process GO:0016491; oxidoreductase activity; molecular_function GO:0016209; NA GO:0005681; spliceosomal complex; cellular_component GO:0045454; cell redox homeostasis; biological_process}	{DQ122787.1; Medicago sativa clone B5 thioredoxin h mRNA, complete cds}	{PF00085:Thioredoxin PF00578:AhpC/TSA family PF08534:Redoxin PF02966:Mitosis protein DIM1}
i0_HQ_c10034/f2p5/601	{GAU31979.1; hypothetical protein TSUD_359240 [Trifolium subterraneum]}	{sp|Q9LUM3|SBT15_ARATH; Subtilisin-like protease SBT1.5 OS=Arabidopsis thaliana GN=SBT1.5 PE=2 SV=1}	{mtr:MTR_8g022870; - - - - -}	{NA}	{NA}	{XM_003627376.2; Medicago truncatula subtilisin-like serine protease mRNA}	{NA}
i0_HQ_c100361/f2p1/875	{GAU23128.1; hypothetical protein TSUD_305760 [Trifolium subterraneum]}	{sp|P10822|ICW3_PSOTE; Chymotrypsin inhibitor 3 OS=Psophocarpus tetragonolobus PE=1 SV=2}	{lang:109358661; - - - - -; lang:109358661; - - - - -}	{NA}	{GO:0004866; endopeptidase inhibitor activity; molecular_function GO:0004866; endopeptidase inhibitor activity; molecular_function}	{XM_013606426.1; Medicago truncatula Kunitz type trypsin inhibitor mRNA}	{PF00197:Trypsin and protease inhibitor PF00197:Trypsin and protease inhibitor}
i0_HQ_c100378/f4p0/972	{NA}	{NA}	{NA}	{NA}	{NA}	{XM_003594176.2; Medicago truncatula hypothetical protein mRNA}	{NA}
i0_HQ_c10038/f5p0/542	{GAU25577.1; hypothetical protein TSUD_260110 [Trifolium subterraneum]}	{NA}	{pvu:PHAVU_010G162500g; - - - - -}	{NA}	{NA}	{XM_003604220.2; Medicago truncatula transmembrane protein, putative mRNA}	{NA}
i0_HQ_c100442/f2p3/811	{GAU37076.1; hypothetical protein TSUD_378180 [Trifolium subterraneum]}	{sp|P92963|RAB1C_ARATH; Ras-related protein RABB1c OS=Arabidopsis thaliana GN=RABB1C PE=1 SV=1}	{crb:CARUB_v10005730mg; K07877 RAB2A Ras-related protein Rab-2A - ko04152; Environmental Information Processing; Signal transduction; AMPK signaling pathway}	{At4g17170; KOG0098 GTPase Rab2, small G protein superfamily U Intracellular trafficking, secretion, and vesicular transport ;}	{GO:0005525; GTP binding; molecular_function GO:0005634; nucleus; cellular_component GO:0003924; GTPase activity; molecular_function GO:0005622; intracellular; cellular_component GO:0005737; cytoplasm; cellular_component GO:0007264; small GTPase mediated signal transduction; biological_process}	{XM_003594305.2; Medicago truncatula RAB GTPase-like protein C2B mRNA}	{PF00025:ADP-ribosylation factor family PF01926:50S ribosome-binding GTPase PF03193:Protein of unknown function, DUF258 PF00009:Elongation factor Tu GTP binding domain PF04670:Gtr1/RagA G protein conserved region PF00071:Ras family PF08477:Ras of Complex, Roc, domain of DAPkinase}
i0_HQ_c100488/f2p1/585	{XP_004515077.1; PREDICTED: RING-box protein 1a [Cicer arietinum]}	{sp|Q940X7|RBX1A_ARATH; RING-box protein 1a OS=Arabidopsis thaliana GN=RBX1A PE=1 SV=1}	{adu:107477744; K03868 RBX1, ROC1 RING-box protein 1 - ko04141; Genetic Information Processing; Folding, sorting and degradation; Protein processing in endoplasmic reticulum | ko04120; Genetic Information Processing; Folding, sorting and degradation; Ubiquitin mediated proteolysis | ko03420; Genetic Information Processing; Replication and repair; Nucleotide excision repair | ko04310; Environmenta…	{Hs7657508; KOG2930 SCF ubiquitin ligase, Rbx1 component O Posttranslational modification, protein turnover, chaperones ;}	{GO:0008270; zinc ion binding; molecular_function GO:0046872; metal ion binding; molecular_function GO:0005680; anaphase-promoting complex; cellular_component GO:0004842; ubiquitin-protein ligase activity; molecular_function GO:0005515; protein binding; molecular_function}	{XM_004515020.2; PREDICTED: Cicer arietinum RING-box protein 1a (LOC101496300), mRNA}	{PF13639:Ring finger domain PF12861:Anaphase-promoting complex subunit 11 RING-H2 finger PF12678:RING-H2 zinc finger domain PF00097:Zinc finger, C3HC4 type (RING finger)}
i0_HQ_c100501/f2p3/658	{GAU35323.1; hypothetical protein TSUD_337150 [Trifolium subterraneum]}	{NA}	{cam:101490254; - - - - -}	{NA}	{NA}	{BT134494.1; Medicago truncatula clone JCVI-FLMt-1F14 unknown mRNA}	{NA}
i0_HQ_c100518/f2p0/822	{BAE71195.1; hypothetical protein, partial [Trifolium pratense]}	{NA}	{NA}	{NA}	{NA}	{AB236743.1; Trifolium pratense RNA for hypothetical protein, partial cds, clone: C1390}	{NA}
i0_HQ_c100531/f2p0/803	{GAU37370.1; hypothetical protein TSUD_277440 [Trifolium subterraneum]}	{sp|P17673|RBS_TRIRP; Ribulose bisphosphate carboxylase small chain, chloroplastic OS=Trifolium repens GN=RBCS PE=3 SV=1}	{cam:105851539; K01602 rbcS ribulose-bisphosphate carboxylase small chain 4.1.1.39 ko01200; Metabolism; Global and overview maps; Carbon metabolism | ko00630; Metabolism; Carbohydrate metabolism; Glyoxylate and dicarboxylate metabolism | ko00710; Metabolism; Energy metabolism; Carbon fixation in photosynthetic organisms}	{NA}	{NA}	{AF056315.1; Medicago sativa ribulose-1,5-bisphosphate carboxylase small subunit mRNA, nuclear gene encoding chloroplast protein, complete cds}	{NA}
i0_HQ_c10056/f3p2/641	{GAU22126.1; hypothetical protein TSUD_310300 [Trifolium subterraneum]}	{sp|Q9T0I8|MTN1_ARATH; 5'-methylthioadenosine/S-adenosylhomocysteine nucleosidase 1 OS=Arabidopsis thaliana GN=MTN1 PE=1 SV=1}	{vra:106759877; K01244 MTN 5'-methylthioadenosine nucleosidase 3.2.2.16 ko00270; Metabolism; Amino acid metabolism; Cysteine and methionine metabolism}	{NA}	{GO:0009116; nucleoside metabolic process; biological_process GO:0003824; NA}	{XM_004500688.2; PREDICTED: Cicer arietinum 5'-methylthioadenosine/S-adenosylhomocysteine nucleosidase 2-like (LOC101501070), mRNA}	{PF01048:Phosphorylase superfamily}
i0_HQ_c1006/f4p0/974	{AAR10886.1; chlorophyll a/b binding protein [Trifolium pratense]}	{sp|P07371|CB22_PEA; Chlorophyll a-b binding protein AB80, chloroplastic OS=Pisum sativum GN=AB80 PE=1 SV=1}	{csv:101211276; K08912 LHCB1 light-harvesting complex II chlorophyll a/b binding protein 1 - ko00196; Metabolism; Energy metabolism; Photosynthesis - antenna proteins}	{NA}	{NA}	{AY430082.1; Trifolium pratense chlorophyll a/b binding protein mRNA, complete cds; nuclear gene for chloroplast product}	{NA}
i0_HQ_c100609/f2p3/877	{GAU23128.1; hypothetical protein TSUD_305760 [Trifolium subterraneum]}	{sp|P10822|ICW3_PSOTE; Chymotrypsin inhibitor 3 OS=Psophocarpus tetragonolobus PE=1 SV=2}	{vra:106767274; - - - - -}	{NA}	{GO:0004866; endopeptidase inhibitor activity; molecular_function GO:0004866; endopeptidase inhibitor activity; molecular_function}	{XM_013606426.1; Medicago truncatula Kunitz type trypsin inhibitor mRNA}	{PF00197:Trypsin and protease inhibitor PF00197:Trypsin and protease inhibitor}
i0_HQ_c100730/f2p5/768	{XP_016443822.1; PREDICTED: cytochrome b6 [Nicotiana tabacum]}	{sp|P56773|CYB6_ARATH; Cytochrome b6 OS=Arabidopsis thaliana GN=petB PE=1 SV=1}	{nta:107769160; - - - - -}	{AtCh052; KOG4663 Cytochrome b C Energy production and conversion ;}	{GO:0016491; oxidoreductase activity; molecular_function GO:0022904; respiratory electron transport chain; biological_process GO:0016021; integral to membrane; cellular_component GO:0009055; NA GO:0016020; membrane; cellular_component}	{EU849487.1; Trifolium subterraneum chloroplast, complete genome}	{PF00033:Cytochrome b/b6/petB PF13631:Cytochrome b(N-terminal)/b6/petB PF01292:Prokaryotic cytochrome b561}
i0_HQ_c100790/f2p1/663	{XP_004511034.1; PREDICTED: prefoldin subunit 1 [Cicer arietinum]}	{sp|Q5RAM7|PFD1_PONAB; Prefoldin subunit 1 OS=Pongo abelii GN=PFDN1 PE=2 SV=1}	{pvu:PHAVU_011G206700g; K09548 PFDN1 prefoldin subunit 1 - -}	{At2g07350; KOG3501 Molecular chaperone Prefoldin, subunit 1 O Posttranslational modification, protein turnover, chaperones ;}	{GO:0004883; glucocorticoid receptor activity; molecular_function GO:0042921; glucocorticoid receptor signaling pathway; biological_process GO:0043402; glucocorticoid mediated signaling pathway; biological_process GO:0033179; proton-transporting V-type ATPase, V0 domain; cellular_component GO:0051082; unfolded protein binding; molecular_function GO:0005634; nucleus; cellular_component GO:0015078;…	{BT149506.1; Medicago truncatula clone JCVI-FLMt-4A22 unknown mRNA}	{PF02996:Prefoldin subunit PF02155:Glucocorticoid receptor PF01920:Prefoldin subunit PF01496:V-type ATPase 116kDa subunit family }
i0_HQ_c100805/f2p0/459	{XP_002512247.1; PREDICTED: 40S ribosomal protein S24-1 [Ricinus communis]}	{sp|Q9SS17|RS241_ARATH; 40S ribosomal protein S24-1 OS=Arabidopsis thaliana GN=RPS24A PE=2 SV=1}	{aip:107625441; K02974 RP-S24e, RPS24 small subunit ribosomal protein S24e - ko03010; Genetic Information Processing; Translation; Ribosome}	{At3g04920; KOG3424 40S ribosomal protein S24 J Translation, ribosomal structure and biogenesis ;}	{NA}	{XM_003590976.2; Medicago truncatula 40S ribosomal protein S24-2 mRNA}	{NA}
i0_HQ_c100812/f3p0/694	{GAU38429.1; hypothetical protein TSUD_396090 [Trifolium subterraneum]}	{sp|Q41229|PSAEB_NICSY; Photosystem I reaction center subunit IV B, chloroplastic OS=Nicotiana sylvestris GN=PSAEB PE=1 SV=1}	{cam:101507899; K02693 psaE photosystem I subunit IV - ko00195; Metabolism; Energy metabolism; Photosynthesis}	{NA}	{GO:0009522; photosystem I; cellular_component GO:0015979; photosynthesis; biological_process GO:0009538; photosystem I reaction center; cellular_component}	{XM_013612935.1; Medicago truncatula photosystem I reaction center subunit IV A mRNA}	{PF02427:Photosystem I reaction centre subunit IV / PsaE}
i0_HQ_c100840/f3p1/1008	{XP_013454459.1; light-harvesting complex I chlorophyll A/B-binding protein [Medicago truncatula]}	{sp|Q32904|CB23_PEA; Chlorophyll a-b binding protein 3, chloroplastic OS=Pisum sativum GN=lhca3 PE=1 SV=1}	{cam:101493704; K08909 LHCA3 light-harvesting complex I chlorophyll a/b binding protein 3 - ko00196; Metabolism; Energy metabolism; Photosynthesis - antenna proteins}	{NA}	{NA}	{XM_013599005.1; Medicago truncatula light-harvesting complex I chlorophyll A/B-binding protein mRNA}	{NA}
i0_HQ_c100871/f3p5/851	{GAU34208.1; hypothetical protein TSUD_209900 [Trifolium subterraneum]}	{sp|Q9SXU1|PSA7_CICAR; Proteasome subunit alpha type-7 OS=Cicer arietinum GN=PAD1 PE=2 SV=1}	{mtr:MTR_8g075320; K02731 PSMA7 20S proteasome subunit alpha 4 3.4.25.1 ko03050; Genetic Information Processing; Folding, sorting and degradation; Proteasome}	{At5g66140; KOG0183 20S proteasome, regulatory subunit alpha type PSMA7/PRE6 O Posttranslational modification, protein turnover, chaperones ;}	{GO:0051603; proteolysis involved in cellular protein catabolic process; biological_process GO:0004298; threonine-type endopeptidase activity; molecular_function GO:0006511; ubiquitin-dependent protein catabolic process; biological_process GO:0005839; proteasome core complex; cellular_component GO:0004175; endopeptidase activity; molecular_function GO:0019773; proteasome core complex, alpha-subun…	{NM_001278992.1; Cicer arietinum proteasome subunit alpha type-7-like (PAD1), mRNA}	{PF00227:Proteasome subunit PF10584:Proteasome subunit A N-terminal signature}
i0_HQ_c100874/f2p3/563	{GAU31122.1; hypothetical protein TSUD_212280 [Trifolium subterraneum]}	{sp|Q8VZE7|RAP_ARATH; RAP domain-containing protein, chloroplastic OS=Arabidopsis thaliana GN=RAP PE=1 SV=1}	{mtr:MTR_8g432340; - - - - -}	{NA}	{NA}	{XM_012718738.1; PREDICTED: Cicer arietinum uncharacterized LOC101502508 (LOC101502508), transcript variant X4, mRNA}	{NA}
i0_HQ_c100891/f3p0/796	{GAU30395.1; hypothetical protein TSUD_364410 [Trifolium subterraneum]}	{sp|Q9SSK5|MLP43_ARATH; MLP-like protein 43 OS=Arabidopsis thaliana GN=MLP43 PE=1 SV=1}	{mtr:MTR_8g045695; - - - - -}	{NA}	{GO:0006952; defense response; biological_process GO:0009607; response to biotic stimulus; biological_process}	{XM_013589792.1; Medicago truncatula polyketide cyclase/dehydrase and lipid transporter mRNA}	{PF00407:Pathogenesis-related protein Bet v I family}
i0_HQ_c100907/f2p1/502	{GAU42539.1; hypothetical protein TSUD_341650 [Trifolium subterraneum]}	{sp|O82255|GRC13_ARATH; Glutaredoxin-C13 OS=Arabidopsis thaliana GN=GRXC13 PE=3 SV=1}	{cam:101500507; K03676 grxC, GLRX, GLRX2 glutaredoxin 3 - -}	{At2g47880; KOG1752 Glutaredoxin and related proteins O Posttranslational modification, protein turnover, chaperones ;}	{NA}	{XM_003625822.2; Medicago truncatula monothiol glutaredoxin-S2 protein mRNA}	{NA}
i0_HQ_c101012/f2p8/557	{NA}	{NA}	{NA}	{NA}	{NA}	{XM_004492681.2; PREDICTED: Cicer arietinum uncharacterized LOC101504997 (LOC101504997), transcript variant X4, mRNA}	{NA}
i0_HQ_c101061/f2p4/626	{GAU15480.1; hypothetical protein TSUD_45170 [Trifolium subterraneum]}	{NA}	{cam:101512514; K04515 CAMK2 calcium/calmodulin-dependent protein kinase (CaM kinase) II 2.7.11.17 ko04012; Environmental Information Processing; Signal transduction; ErbB signaling pathway | ko04310; Environmental Information Processing; Signal transduction; Wnt signaling pathway | ko04066; Environmental Information Processing; Signal transduction; HIF-1 signaling pathway | ko04020; Environmenta…	{At1g12580; KOG0032 Ca2+/calmodulin-dependent protein kinase, EF-Hand protein superfamily T Signal transduction mechanisms ;}	{NA}	{XM_003592276.2; Medicago truncatula calcium-dependent kinase mRNA}	{NA}
i0_HQ_c101076/f2p2/571	{NA}	{NA}	{NA}	{NA}	{NA}	{AB236802.1; Trifolium pratense RNA for hypothetical protein, complete cds, clone: C1966}	{NA}
i0_HQ_c10109/f2p0/405	{NA}	{NA}	{NA}	{NA}	{NA}	{XM_003602229.2; Medicago truncatula transmembrane protein, putative mRNA}	{NA}
i0_HQ_c101113/f2p0/974	{AAR10886.1; chlorophyll a/b binding protein [Trifolium pratense]}	{sp|P07371|CB22_PEA; Chlorophyll a-b binding protein AB80, chloroplastic OS=Pisum sativum GN=AB80 PE=1 SV=1}	{cann:107857025; - - - - -}	{NA}	{GO:0046872; metal ion binding; molecular_function GO:0003824; NA}	{AY430082.1; Trifolium pratense chlorophyll a/b binding protein mRNA, complete cds; nuclear gene for chloroplast product}	{PF10143:2,3-bisphosphoglycerate-independent phosphoglycerate mutase}
i0_HQ_c101184/f2p1/330	{NA}	{NA}	{NA}	{NA}	{NA}	{NA}	{NA}
i0_HQ_c10121/f3p5/720	{XP_017425218.1; PREDICTED: 40S ribosomal protein S11-like [Vigna angularis]}	{sp|P17093|RS11_SOYBN; 40S ribosomal protein S11 OS=Glycine max GN=RPS11 PE=2 SV=2}	{var:108334088; K02949 RP-S11e, RPS11 small subunit ribosomal protein S11e - ko03010; Genetic Information Processing; Translation; Ribosome}	{At3g48930; KOG1728 40S ribosomal protein S11 J Translation, ribosomal structure and biogenesis ;}	{GO:0003735; structural constituent of ribosome; molecular_function GO:0005622; intracellular; cellular_component GO:0006412; translation; biological_process GO:0005840; ribosome; cellular_component}	{XM_003588994.2; Medicago truncatula 40S ribosomal protein S11-1 mRNA}	{PF00366:Ribosomal protein S17}
i0_HQ_c101218/f2p3/844	{GAU39565.1; hypothetical protein TSUD_38180 [Trifolium subterraneum]}	{sp|Q8L4N1|PHO34_ARATH; Universal stress protein PHOS34 OS=Arabidopsis thaliana GN=PHOS34 PE=1 SV=1}	{cam:101494457; - - - - -}	{NA}	{GO:0006950; response to stress; biological_process}	{XM_003591494.2; Medicago truncatula universal stress family protein mRNA}	{PF00582:Universal stress protein family}
i0_HQ_c10122/f2p11/381	{NA}	{NA}	{NA}	{NA}	{NA}	{XM_004515788.2; PREDICTED: Cicer arietinum uncharacterized LOC101495970 (LOC101495970), mRNA}	{NA}
i0_HQ_c101316/f2p7/983	{GAU49273.1; hypothetical protein TSUD_176340, partial [Trifolium subterraneum]}	{sp|Q9LZ06|GSTL3_ARATH; Glutathione S-transferase L3 OS=Arabidopsis thaliana GN=GSTL3 PE=2 SV=1}	{cam:101511327; K00799 GST, gst glutathione S-transferase 2.5.1.18 ko00480; Metabolism; Metabolism of other amino acids; Glutathione metabolism | ko00980; Metabolism; Xenobiotics biodegradation and metabolism; Metabolism of xenobiotics by cytochrome P450 | ko00982; Metabolism; Xenobiotics biodegradation and metabolism; Drug metabolism - cytochrome P450 | ko05204; Human Diseases; Cancers: Overview…	{At5g02790; KOG0406 Glutathione S-transferase O Posttranslational modification, protein turnover, chaperones ;}	{GO:0005515; protein binding; molecular_function}	{BT146380.1; Medicago truncatula clone JCVI-FLMt-5O5 unknown mRNA}	{PF13409:Glutathione S-transferase, N-terminal domain PF02798:Glutathione S-transferase, N-terminal domain PF13417:Glutathione S-transferase, N-terminal domain}
i0_HQ_c10135/f2p1/856	{XP_004499868.1; PREDICTED: zinc finger A20 and AN1 domain-containing stress-associated protein 5-like [Cicer arietinum]}	{sp|Q9LHJ8|SAP5_ARATH; Zinc finger A20 and AN1 domain-containing stress-associated protein 5 OS=Arabidopsis thaliana GN=SAP5 PE=2 SV=1}	{vra:106760836; - - - - -}	{At3g12630; KOG3173 Predicted Zn-finger protein R General function prediction only ;}	{GO:0006464; protein modification process; biological_process GO:0016151; nickel ion binding; molecular_function GO:0003677; DNA binding; molecular_function GO:0008270; zinc ion binding; molecular_function}	{XM_004499811.2; PREDICTED: Cicer arietinum zinc finger A20 and AN1 domain-containing stress-associated protein 5-like (LOC101504501), mRNA}	{PF01155:Hydrogenase/urease nickel incorporation, metallochaperone, hypA PF01754:A20-like zinc finger PF01428:AN1-like Zinc finger}
i0_HQ_c101372/f2p5/367	{NA}	{NA}	{NA}	{NA}	{NA}	{EU849487.1; Trifolium subterraneum chloroplast, complete genome}	{NA}
i0_HQ_c10139/f4p1/939	{GAU41832.1; hypothetical protein TSUD_177430 [Trifolium subterraneum]}	{sp|P32110|GSTX6_SOYBN; Probable glutathione S-transferase OS=Glycine max GN=HSP26-A PE=2 SV=1}	{mtr:MTR_7g065260; K00799 GST, gst glutathione S-transferase 2.5.1.18 ko00480; Metabolism; Metabolism of other amino acids; Glutathione metabolism | ko00980; Metabolism; Xenobiotics biodegradation and metabolism; Metabolism of xenobiotics by cytochrome P450 | ko00982; Metabolism; Xenobiotics biodegradation and metabolism; Drug metabolism - cytochrome P450 | ko05204; Human Diseases; Cancers: Overv…	{At3g09270; KOG0406 Glutathione S-transferase O Posttranslational modification, protein turnover, chaperones ;}	{GO:0005515; protein binding; molecular_function}	{XM_003623147.2; Medicago truncatula glutathione S-transferase mRNA}	{PF13417:Glutathione S-transferase, N-terminal domain PF02798:Glutathione S-transferase, N-terminal domain PF13409:Glutathione S-transferase, N-terminal domain}
i0_HQ_c101409/f3p6/662	{XP_006488031.1; PREDICTED: ubiquitin-40S ribosomal protein S27a-like [Citrus sinensis]}	{sp|P47905|RS27A_LUPAL; Ubiquitin-40S ribosomal protein S27a OS=Lupinus albus PE=3 SV=2}	{mtr:MTR_8g088060; K02977 RP-S27Ae, RPS27A small subunit ribosomal protein S27Ae - ko03010; Genetic Information Processing; Translation; Ribosome}	{At2g47110; KOG0004 Ubiquitin/40S ribosomal protein S27a fusion J Translation, ribosomal structure and biogenesis ;}	{GO:0006412; translation; biological_process GO:0003735; structural constituent of ribosome; molecular_function GO:0005622; intracellular; cellular_component GO:0005515; protein binding; molecular_function GO:0005840; ribosome; cellular_component}	{XM_003629847.2; Medicago truncatula ubiquitin-40S ribosomal S27a-like protein mRNA}	{PF01599:Ribosomal protein S27a PF00240:Ubiquitin family}
i0_HQ_c10141/f3p15/587	{GAU41351.1; hypothetical protein TSUD_390370 [Trifolium subterraneum]}	{NA}	{cam:101515691; K12811 DDX46, PRP5 ATP-dependent RNA helicase DDX46/PRP5 3.6.4.13 ko03040; Genetic Information Processing; Transcription; Spliceosome}	{NA}	{NA}	{XM_003592981.2; Medicago truncatula DEAD-box RNA helicase family protein mRNA}	{NA}
i0_HQ_c10149/f4p1/777	{GAU33455.1; hypothetical protein TSUD_380910 [Trifolium subterraneum]}	{sp|Q9M7T0|PRX2F_ARATH; Peroxiredoxin-2F, mitochondrial OS=Arabidopsis thaliana GN=PRXIIF PE=1 SV=2}	{cam:101493242; - - - - -}	{At3g06050; KOG0541 Alkyl hydroperoxide reductase/peroxiredoxin O Posttranslational modification, protein turnover, chaperones ;}	{GO:0016209; NA GO:0009405; pathogenesis; biological_process GO:0055114; oxidation-reduction process; biological_process GO:0016491; oxidoreductase activity; molecular_function}	{XM_013607312.1; Medicago truncatula type II peroxiredoxin mRNA}	{PF01123:Staphylococcal/Streptococcal toxin, OB-fold domain PF08534:Redoxin PF00578:AhpC/TSA family}
i0_HQ_c101497/f2p1/718	{GAU51452.1; hypothetical protein TSUD_413490 [Trifolium subterraneum]}	{sp|Q9SAL0|RGLG4_ARATH; E3 ubiquitin-protein ligase RGLG4 OS=Arabidopsis thaliana GN=RGLG4 PE=1 SV=1}	{cam:101509230; K16280 RGLG E3 ubiquitin-protein ligase RGLG 2.3.2.27 -}	{At1g79380; KOG1327 Copine T Signal transduction mechanisms ;}	{GO:0050524; coenzyme-B sulfoethylthiotransferase activity; molecular_function}	{XM_013608727.1; Medicago truncatula calcium-dependent phospholipid-binding copine family protein partial mRNA}	{PF02783:Methyl-coenzyme M reductase beta subunit, N-terminal domain}
i0_HQ_c101504/f3p46/363	{NA}	{NA}	{NA}	{NA}	{NA}	{NA}	{NA}
i0_HQ_c10154/f3p0/733	{XP_013450955.1; transcription factor [Medicago truncatula]}	{sp|Q8GW32|PRE6_ARATH; Transcription factor PRE6 OS=Arabidopsis thaliana GN=PRE6 PE=1 SV=1}	{cam:101512587; - - - - -}	{NA}	{NA}	{XM_013595501.1; Medicago truncatula transcription factor mRNA}	{NA}
i0_HQ_c101606/f3p0/785	{GAU37370.1; hypothetical protein TSUD_277440 [Trifolium subterraneum]}	{sp|P17673|RBS_TRIRP; Ribulose bisphosphate carboxylase small chain, chloroplastic OS=Trifolium repens GN=RBCS PE=3 SV=1}	{cam:105851539; K01602 rbcS ribulose-bisphosphate carboxylase small chain 4.1.1.39 ko01200; Metabolism; Global and overview maps; Carbon metabolism | ko00630; Metabolism; Carbohydrate metabolism; Glyoxylate and dicarboxylate metabolism | ko00710; Metabolism; Energy metabolism; Carbon fixation in photosynthetic organisms}	{NA}	{NA}	{AF056315.1; Medicago sativa ribulose-1,5-bisphosphate carboxylase small subunit mRNA, nuclear gene encoding chloroplast protein, complete cds}	{NA}
i0_HQ_c10162/f2p0/527	{GAU49034.1; hypothetical protein TSUD_236910 [Trifolium subterraneum]}	{NA}	{NA}	{NA}	{NA}	{XM_003612653.2; Medicago truncatula transmembrane protein, putative mRNA}	{NA}
i0_HQ_c101631/f3p0/313	{NA}	{NA}	{NA}	{NA}	{NA}	{BT140123.1; Medicago truncatula clone JCVI-FLMt-7K15 unknown mRNA}	{NA}
i0_HQ_c10165/f4p2/565	{GAU45520.1; hypothetical protein TSUD_186770 [Trifolium subterraneum]}	{sp|Q93Z25|PLY22_ARATH; Probable pectate lyase 22 OS=Arabidopsis thaliana GN=At5g63180 PE=2 SV=1}	{lang:109357839; K01728 pel pectate lyase 4.2.2.2 ko00040; Metabolism; Carbohydrate metabolism; Pentose and glucuronate interconversions | ko02024; Cellular Processes; Cellular community - prokaryotes; Quorum sensing; lang:109357839; - - - - -}	{NA}	{NA}	{XM_003608861.2; Medicago truncatula pectate lyase family protein mRNA}	{NA}
i0_HQ_c10170/f3p13/717	{BAG09553.1; xyloglucan endotransglucosylase, partial [Pisum sativum]}	{sp|Q8LDW9|XTH9_ARATH; Xyloglucan endotransglucosylase/hydrolase protein 9 OS=Arabidopsis thaliana GN=XTH9 PE=2 SV=2}	{cam:101489665; K08235 E2.4.1.207 xyloglucan:xyloglucosyl transferase 2.4.1.207 -; cam:101489665; K08235 E2.4.1.207 xyloglucan:xyloglucosyl transferase 2.4.1.207 -}	{NA}	{GO:0005975; carbohydrate metabolic process; biological_process GO:0006073; cellular glucan metabolic process; biological_process GO:0004553; hydrolase activity, hydrolyzing O-glycosyl compounds; molecular_function GO:0005618; cell wall; cellular_component GO:0048046; apoplast; cellular_component GO:0016762; xyloglucan:xyloglucosyl transferase activity; molecular_function}	{XM_003597008.2; Medicago truncatula xyloglucan endotransglucosylase/hydrolase family protein mRNA}	{PF00722:Glycosyl hydrolases family 16 PF06955:Xyloglucan endo-transglycosylase (XET) C-terminus}
i0_HQ_c10174/f3p1/906	{GAU24558.1; hypothetical protein TSUD_148990 [Trifolium subterraneum]}	{sp|Q9LX15|DFC_ARATH; Protein DOWNSTREAM OF FLC OS=Arabidopsis thaliana GN=DFC PE=2 SV=1}	{vra:106759743; - - - - -}	{NA}	{NA}	{NA}	{NA}
i0_HQ_c101840/f2p2/361	{NA}	{NA}	{NA}	{NA}	{NA}	{NA}	{NA}
i0_HQ_c101887/f3p1/951	{GAU23128.1; hypothetical protein TSUD_305760 [Trifolium subterraneum]}	{sp|P10822|ICW3_PSOTE; Chymotrypsin inhibitor 3 OS=Psophocarpus tetragonolobus PE=1 SV=2}	{vra:106767274; - - - - -}	{NA}	{GO:0004866; endopeptidase inhibitor activity; molecular_function GO:0004866; endopeptidase inhibitor activity; molecular_function}	{XM_013606426.1; Medicago truncatula Kunitz type trypsin inhibitor mRNA}	{PF00197:Trypsin and protease inhibitor PF00197:Trypsin and protease inhibitor}
i0_HQ_c10200/f2p1/583	{GAU42889.1; hypothetical protein TSUD_232010 [Trifolium subterraneum]}	{sp|O23140|AP2M_ARATH; AP-2 complex subunit mu OS=Arabidopsis thaliana GN=AP2M PE=1 SV=1}	{pper:PRUPE_ppa005912mg; K11826 AP2M1 AP-2 complex subunit mu-1 - ko04144; Cellular Processes; Transport and catabolism; Endocytosis | ko04961; Organismal Systems; Excretory system; Endocrine and other factor-regulated calcium reabsorption | ko04721; Organismal Systems; Nervous system; Synaptic vesicle cycle | ko05016; Human Diseases; Neurodegenerative diseases; Huntington's disease}	{At5g46630; KOG0938 Adaptor complexes medium subunit family U Intracellular trafficking, secretion, and vesicular transport ;}	{NA}	{XM_003611425.2; Medicago truncatula clathrin-adaptor medium chain AP-2 mRNA}	{NA}
i0_HQ_c10201/f2p0/930	{GAU26112.1; hypothetical protein TSUD_225750 [Trifolium subterraneum]}	{sp|Q8K2Y7|RM47_MOUSE; 39S ribosomal protein L47, mitochondrial OS=Mus musculus GN=Mrpl47 PE=1 SV=2}	{cam:101497914; K17428 MRPL47, NCM1 large subunit ribosomal protein L47 - -}	{At1g07830; KOG3331 Mitochondrial/chloroplast ribosomal protein L4/L29 J Translation, ribosomal structure and biogenesis ;}	{GO:0005840; ribosome; cellular_component GO:0005761; mitochondrial ribosome; cellular_component GO:0006412; translation; biological_process GO:0003735; structural constituent of ribosome; molecular_function GO:0005622; intracellular; cellular_component}	{BT149304.1; Medicago truncatula clone JCVI-FLMt-5O19 unknown mRNA}	{PF00831:Ribosomal L29 protein PF06984:Mitochondrial 39-S ribosomal protein L47 (MRP-L47)}
i0_HQ_c10203/f2p0/413	{JAT62563.1; Glucose-repressible gene protein, partial [Anthurium amnicola]}	{sp|P22151|GRG1_NEUCR; Glucose-repressible gene protein OS=Neurospora crassa (strain ATCC 24698 / 74-OR23-1A / CBS 708.71 / DSM 1257 / FGSC 987) GN=grg-1 PE=2 SV=1}	{NA}	{NA}	{NA}	{NA}	{NA}
i0_HQ_c10212/f4p0/967	{GAU27972.1; hypothetical protein TSUD_146900 [Trifolium subterraneum]}	{sp|Q10NQ9|IF4E3_ORYSJ; Eukaryotic translation initiation factor NCBP OS=Oryza sativa subsp. japonica GN=NCBP PE=2 SV=1}	{cam:101505726; K03259 EIF4E translation initiation factor 4E - ko03013; Genetic Information Processing; Translation; RNA transport | ko04066; Environmental Information Processing; Signal transduction; HIF-1 signaling pathway | ko04151; Environmental Information Processing; Signal transduction; PI3K-Akt signaling pathway | ko04150; Environmental Information Processing; Signal transduction; mTOR s…	{At5g18110; KOG1669 Predicted mRNA cap-binding protein related to eIF-4E J Translation, ribosomal structure and biogenesis ;}	{GO:0003723; RNA binding; molecular_function GO:0005737; cytoplasm; cellular_component GO:0006413; translational initiation; biological_process GO:0003743; translation initiation factor activity; molecular_function}	{XM_004489639.2; PREDICTED: Cicer arietinum eukaryotic translation initiation factor NCBP (LOC101505726), mRNA}	{PF01652:Eukaryotic initiation factor 4E}
i0_HQ_c10230/f2p1/350	{GAU23474.1; hypothetical protein TSUD_81560 [Trifolium subterraneum]}	{NA}	{mtr:MTR_8g080880; K01426 E3.5.1.4, amiE amidase 3.5.1.4 ko00330; Metabolism; Amino acid metabolism; Arginine and proline metabolism | ko00360; Metabolism; Amino acid metabolism; Phenylalanine metabolism | ko00380; Metabolism; Amino acid metabolism; Tryptophan metabolism | ko00627; Metabolism; Xenobiotics biodegradation and metabolism; Aminobenzoate degradation | ko00643; Metabolism; Xenobiotics …	{At4g34880; KOG1211 Amidases J Translation, ribosomal structure and biogenesis ;}	{NA}	{XM_013591144.1; Medicago truncatula amidase C869.01-like protein, putative mRNA}	{NA}
i0_HQ_c102331/f2p0/351	{XP_003546428.1; PREDICTED: DNA-directed RNA polymerase I subunit rpa49 [Glycine max]}	{NA}	{mtr:MTR_7g104810; K03005 RPA49, POLR1E DNA-directed RNA polymerase I subunit RPA49 - ko00230; Metabolism; Nucleotide metabolism; Purine metabolism | ko00240; Metabolism; Nucleotide metabolism; Pyrimidine metabolism | ko03020; Genetic Information Processing; Transcription; RNA polymerase}	{NA}	{NA}	{NA}	{NA}
i0_HQ_c10242/f3p7/994	{XP_004496691.1; PREDICTED: 40S ribosomal protein S3a-like [Cicer arietinum]}	{sp|Q8GTE3|RS3A_CICAR; 40S ribosomal protein S3a OS=Cicer arietinum PE=2 SV=1}	{cam:101507181; K02984 RP-S3Ae, RPS3A small subunit ribosomal protein S3Ae - ko03010; Genetic Information Processing; Translation; Ribosome}	{At3g04840; KOG1628 40S ribosomal protein S3A J Translation, ribosomal structure and biogenesis ;}	{GO:0003735; structural constituent of ribosome; molecular_function GO:0005622; intracellular; cellular_component GO:0006412; translation; biological_process GO:0005840; ribosome; cellular_component}	{XM_013614325.1; Medicago truncatula 40S ribosomal protein S3a-1 mRNA}	{PF01015:Ribosomal S3Ae family}
i0_HQ_c10250/f3p2/921	{GAU16497.1; hypothetical protein TSUD_167290 [Trifolium subterraneum]}	{sp|P0C8K6|RM02_ORYSA; 60S ribosomal protein L2, mitochondrial OS=Oryza sativa GN=RPL2 PE=3 SV=1}	{cam:101499829; - - - - -}	{At2g07715; KOG0438 Mitochondrial/chloroplast ribosomal protein L2 J Translation, ribosomal structure and biogenesis ;}	{GO:0006412; translation; biological_process GO:0003735; structural constituent of ribosome; molecular_function GO:0005622; intracellular; cellular_component GO:0005840; ribosome; cellular_component}	{XM_004489056.2; PREDICTED: Cicer arietinum 60S ribosomal protein L2, mitochondrial (LOC101499829), mRNA}	{PF00181:Ribosomal Proteins L2, RNA binding domain}
i0_HQ_c102502/f4p0/970	{AAR10886.1; chlorophyll a/b binding protein [Trifolium pratense]}	{sp|P07371|CB22_PEA; Chlorophyll a-b binding protein AB80, chloroplastic OS=Pisum sativum GN=AB80 PE=1 SV=1}	{csv:101211276; K08912 LHCB1 light-harvesting complex II chlorophyll a/b binding protein 1 - ko00196; Metabolism; Energy metabolism; Photosynthesis - antenna proteins}	{NA}	{GO:0046872; metal ion binding; molecular_function GO:0003824; NA}	{AY430082.1; Trifolium pratense chlorophyll a/b binding protein mRNA, complete cds; nuclear gene for chloroplast product}	{PF10143:2,3-bisphosphoglycerate-independent phosphoglycerate mutase}
i0_HQ_c10256/f9p1/399	{XP_003615432.1; hypothetical protein MTR_5g067940 [Medicago truncatula]}	{NA}	{NA}	{NA}	{NA}	{JN617178.1; Trifolium pratense tRNA-Leu (trnL) gene, partial sequence; chloroplast}	{NA}
i0_HQ_c102581/f3p1/732	{GAU31626.1; hypothetical protein TSUD_38230 [Trifolium subterraneum]}	{sp|Q9M015|Y5161_ARATH; Uncharacterized protein At5g01610 OS=Arabidopsis thaliana GN=At5g01610 PE=1 SV=1}	{cam:101515652; - - - - -}	{NA}	{NA}	{XM_003591452.2; Medicago truncatula DUF538 family protein mRNA}	{NA}
i0_HQ_c102625/f2p0/694	{XP_003603843.1; plastocyanin [Medicago truncatula]}	{sp|P16002|PLAS_PEA; Plastocyanin, chloroplastic OS=Pisum sativum GN=PETE PE=3 SV=1}	{pvu:PHAVU_009G020300g; K02638 petE plastocyanin - ko00195; Metabolism; Energy metabolism; Photosynthesis}	{NA}	{GO:0009055; NA GO:0005507; copper ion binding; molecular_function}	{BT142398.1; Medicago truncatula clone JCVI-FLMt-7M24 unknown mRNA}	{PF00127:Copper binding proteins, plastocyanin/azurin family}
i0_HQ_c102664/f2p4/410	{GAU11402.1; hypothetical protein TSUD_343930 [Trifolium subterraneum]}	{sp|Q0DKW8|LTI6B_ORYSJ; Hydrophobic protein LTI6B OS=Oryza sativa subsp. japonica GN=LTI6B PE=2 SV=1}	{cam:101498830; - - - - -}	{At3g05890; KOG1773 Stress responsive protein R General function prediction only ;}	{NA}	{XM_003554548.2; PREDICTED: Glycine max hydrophobic protein RCI2B (LOC100792684), mRNA}	{NA}
i0_HQ_c102738/f3p0/608	{AAQ21121.1; photosystem I psaH protein [Trifolium pratense]}	{sp|Q9SUI6|PSAH2_ARATH; Photosystem I reaction center subunit VI-2, chloroplastic OS=Arabidopsis thaliana GN=PSAH2 PE=2 SV=1}	{cam:101510840; K02695 psaH photosystem I subunit VI - ko00195; Metabolism; Energy metabolism; Photosynthesis}	{NA}	{GO:0015979; photosynthesis; biological_process GO:0009522; photosystem I; cellular_component GO:0009538; photosystem I reaction center; cellular_component}	{AY340641.1; Trifolium pratense photosystem I psaH protein mRNA, complete cds}	{PF03244:Photosystem I reaction centre subunit VI}
i0_HQ_c102748/f2p1/399	{GAU30096.1; hypothetical protein TSUD_55800 [Trifolium subterraneum]}	{NA}	{cam:101506730; - - - - -}	{NA}	{NA}	{XM_012714536.1; PREDICTED: Cicer arietinum uncharacterized LOC101506730 (LOC101506730), mRNA}	{NA}
i0_HQ_c10276/f4p0/488	{GAU22907.1; hypothetical protein TSUD_377190 [Trifolium subterraneum]}	{NA}	{mdm:103443957; - - - - -}	{NA}	{NA}	{NA}	{NA}
i0_HQ_c102793/f2p1/576	{GAU29912.1; hypothetical protein TSUD_148200 [Trifolium subterraneum]}	{NA}	{adu:107478917; - - - - -}	{NA}	{NA}	{XM_003601136.2; Medicago truncatula phloem specific protein mRNA}	{NA}
i0_HQ_c102853/f3p0/680	{XP_003603843.1; plastocyanin [Medicago truncatula]}	{sp|P16002|PLAS_PEA; Plastocyanin, chloroplastic OS=Pisum sativum GN=PETE PE=3 SV=1}	{pvu:PHAVU_009G020300g; K02638 petE plastocyanin - ko00195; Metabolism; Energy metabolism; Photosynthesis}	{NA}	{GO:0005507; copper ion binding; molecular_function GO:0009055; NA}	{BT142398.1; Medicago truncatula clone JCVI-FLMt-7M24 unknown mRNA}	{PF00127:Copper binding proteins, plastocyanin/azurin family}
i0_HQ_c10294/f2p1/403	{ACJ84706.1; unknown [Medicago truncatula]}	{sp|P40941|ADT2_ARATH; ADP,ATP carrier protein 2, mitochondrial OS=Arabidopsis thaliana GN=AAC2 PE=1 SV=2}	{pvu:PHAVU_011G126000g; K05863 SLC25A4S, ANT solute carrier family 25 (mitochondrial adenine nucleotide translocator), member 4/5/6/31 - ko04020; Environmental Information Processing; Signal transduction; Calcium signaling pathway | ko04022; Environmental Information Processing; Signal transduction; cGMP-PKG signaling pathway | ko05012; Human Diseases; Neurodegenerative diseases; Parkinson's dise…	{At5g13490; KOG0749 Mitochondrial ADP/ATP carrier proteins C Energy production and conversion ;}	{NA}	{AB236784.1; Trifolium pratense RNA for putative ADP,ATP carrier-like protein, complete cds, clone: C1802}	{NA}
i0_HQ_c102944/f2p2/334	{AIJ28286.1; photosystem II protein K (chloroplast) [Trifolium pratense]}	{sp|Q49L15|PSBK_EUCGG; Photosystem II reaction center protein K OS=Eucalyptus globulus subsp. globulus GN=psbK PE=3 SV=1}	{lja:Ljclg3v0000530.1; K02712 psbK photosystem II PsbK protein - ko00195; Metabolism; Energy metabolism; Photosynthesis}	{NA}	{NA}	{EU849487.1; Trifolium subterraneum chloroplast, complete genome}	{NA}
i0_HQ_c10297/f2p10/669	{GAU12906.1; hypothetical protein TSUD_73930 [Trifolium subterraneum]}	{sp|Q9ZU96|Y2168_ARATH; Ankyrin repeat-containing protein At2g01680 OS=Arabidopsis thaliana GN=At2g01680 PE=2 SV=1}	{mtr:MTR_8g105260; - - - - -}	{At2g01680; KOG0504 FOG: Ankyrin repeat R General function prediction only ;}	{NA}	{XM_003630893.2; Medicago truncatula ankyrin repeat plant-like protein mRNA}	{NA}
i0_HQ_c102974/f2p5/859	{GAU50333.1; hypothetical protein TSUD_243650 [Trifolium subterraneum]}	{sp|Q9LTX2|TIR1L_ARATH; Transport inhibitor response 1-like protein OS=Arabidopsis thaliana GN=At5g49980 PE=2 SV=1}	{cam:101489568; - - - - -}	{At5g49980; KOG1947 Leucine rich repeat proteins, some proteins contain F-box R General function prediction only ;}	{NA}	{XM_004490351.2; PREDICTED: Cicer arietinum transport inhibitor response 1-like protein (LOC101489568), mRNA}	{NA}
i0_HQ_c10299/f3p1/823	{XP_003593095.1; partner of Y14-mago protein, putative [Medicago truncatula]}	{sp|Q6PH11|PYM1_DANRE; Partner of Y14 and mago OS=Danio rerio GN=pym1 PE=2 SV=1}	{cam:101495257; K14294 WIBG, PYM partner of Y14 and mago - ko03013; Genetic Information Processing; Translation; RNA transport | ko03015; Genetic Information Processing; Translation; mRNA surveillance pathway}	{At1g11400; KOG4325 Uncharacterized conserved protein S Function unknown ;}	{GO:0005515; protein binding; molecular_function}	{XM_003593047.2; Medicago truncatula partner of Y14-mago protein, putative mRNA}	{PF09282:Mago binding}
i0_HQ_c10300/f2p0/812	{XP_003625508.1; RNA-binding (RRM/RBD/RNP motif) family protein [Medicago truncatula]}	{sp|Q9FZ84|RBG6_ARATH; Glycine-rich RNA-binding protein 6, mitochondrial OS=Arabidopsis thaliana GN=RBG6 PE=2 SV=1}	{cam:101497496; - - - - -}	{At2g37510; KOG0118 FOG: RRM domain R General function prediction only ;}	{GO:0003676; nucleic acid binding; molecular_function}	{XM_003625460.2; Medicago truncatula RNA-binding (RRM/RBD/RNP motif) family protein mRNA}	{PF00076:RNA recognition motif. (a.k.a. RRM, RBD, or RNP domain)}
i0_HQ_c103015/f2p1/690	{XP_019445147.1; PREDICTED: WD repeat-containing protein 55-like isoform X1 [Lupinus angustifolius]}	{sp|O80775|WDR55_ARATH; WD repeat-containing protein 55 OS=Arabidopsis thaliana GN=WDR55 PE=1 SV=2}	{rcu:107262020; - - - - -}	{Hs8923185; KOG2444 WD40 repeat protein R General function prediction only ;}	{GO:0005515; protein binding; molecular_function}	{XM_004508524.2; PREDICTED: Cicer arietinum WD repeat-containing protein 55 homolog (LOC101507962), mRNA}	{PF00400:WD domain, G-beta repeat}
i0_HQ_c103049/f4p5/475	{NA}	{NA}	{NA}	{NA}	{NA}	{XM_003613502.2; Medicago truncatula hypothetical protein mRNA}	{NA}
i0_HQ_c103064/f2p1/335	{NA}	{NA}	{NA}	{NA}	{NA}	{NA}	{NA}
i0_HQ_c103171/f2p0/892	{GAU50986.1; hypothetical protein TSUD_185550 [Trifolium subterraneum]}	{sp|Q9FGS5|NRT31_ARATH; High-affinity nitrate transporter 3.1 OS=Arabidopsis thaliana GN=NRT3.1 PE=1 SV=1}	{var:108334587; - - - - -}	{NA}	{GO:2001070; NA}	{XM_013602278.1; Medicago truncatula component of high affinity nitrate transporter mRNA}	{PF00686:Starch binding domain}
i0_HQ_c103186/f3p1/839	{GAU28081.1; hypothetical protein TSUD_223220 [Trifolium subterraneum]}	{NA}	{gmx:100784127; - - - - -}	{NA}	{NA}	{XM_013598157.1; Medicago truncatula hypothetical protein mRNA}	{NA}
i0_HQ_c10327/f2p0/313	{NA}	{NA}	{NA}	{NA}	{NA}	{XM_004494557.2; PREDICTED: Cicer arietinum probable Xaa-Pro aminopeptidase P (LOC101503378), mRNA}	{NA}
i0_HQ_c10328/f2p3/600	{XP_019446479.1; PREDICTED: importin subunit beta-1-like [Lupinus angustifolius]}	{sp|Q9FJD4|IMB1_ARATH; Importin subunit beta-1 OS=Arabidopsis thaliana GN=KPNB1 PE=1 SV=1}	{adu:107479375; K14293 KPNB1, IPO1 importin subunit beta-1 - ko03013; Genetic Information Processing; Translation; RNA transport}	{At5g53480; KOG1241 Karyopherin (importin) beta 1 YU Nuclear structure ; Intracellular trafficking, secretion, and vesicular transport ;}	{NA}	{XM_013591792.1; Medicago truncatula importin subunit beta-like protein mRNA}	{NA}
i0_HQ_c10332/f3p2/719	{GAU24278.1; hypothetical protein TSUD_48660 [Trifolium subterraneum]}	{sp|Q9M7I9|STEP1_ARATH; Stress enhanced protein 1, chloroplastic OS=Arabidopsis thaliana GN=SEP1 PE=2 SV=1}	{cam:101514020; - - - - -}	{NA}	{NA}	{XM_013614621.1; Medicago truncatula stress enhanced protein mRNA}	{NA}
i0_HQ_c10338/f4p1/591	{GAU44508.1; hypothetical protein TSUD_122780 [Trifolium subterraneum]}	{sp|Q9LE22|CML27_ARATH; Probable calcium-binding protein CML27 OS=Arabidopsis thaliana GN=CML27 PE=1 SV=1}	{vra:106757942; K13448 CML calcium-binding protein CML - ko04626; Organismal Systems; Environmental adaptation; Plant-pathogen interaction}	{At1g18210; KOG0027 Calmodulin and related proteins (EF-Hand superfamily) T Signal transduction mechanisms ;}	{GO:0016788; hydrolase activity, acting on ester bonds; molecular_function GO:0007165; signal transduction; biological_process GO:0005578; proteinaceous extracellular matrix; cellular_component GO:0005509; calcium ion binding; molecular_function}	{XM_013605181.1; Medicago truncatula EF hand calcium-binding family protein mRNA}	{PF13499:EF-hand domain pair PF10591:Secreted protein acidic and rich in cysteine Ca binding region PF13405:EF-hand domain PF09061:Stirrup PF13202:EF hand PF00036:EF hand}
i0_HQ_c10345/f2p1/313	{NA}	{NA}	{NA}	{NA}	{NA}	{NA}	{NA}
i0_HQ_c103459/f2p0/885	{GAU13890.1; hypothetical protein TSUD_262170 [Trifolium subterraneum]}	{sp|Q9C523|DIR19_ARATH; Dirigent protein 19 OS=Arabidopsis thaliana GN=DIR19 PE=2 SV=1}	{aip:107625811; - - - - -}	{NA}	{NA}	{XM_013599351.1; Medicago truncatula disease resistance response protein mRNA}	{NA}
i0_HQ_c10346/f6p5/683	{KYP52668.1; Cytochrome c [Cajanus cajan]}	{sp|Q9T0G2|CYC2_ARATH; Cytochrome c-2 OS=Arabidopsis thaliana GN=CYTC-2 PE=1 SV=1}	{var:108320934; K08738 CYC cytochrome c - ko00920; Metabolism; Energy metabolism; Sulfur metabolism | ko02020; Environmental Information Processing; Signal transduction; Two-component system | ko04210; Cellular Processes; Cell growth and death; Apoptosis | ko04214; Cellular Processes; Cell growth and death; Apoptosis - fly | ko04215; Cellular Processes; Cell growth and death; Apoptosis - multiple…	{At4g10040; KOG3453 Cytochrome c C Energy production and conversion ;}	{GO:0009055; NA GO:0020037; heme binding; molecular_function GO:0005506; iron ion binding; molecular_function}	{XM_003610868.2; Medicago truncatula cytochrome protein C mRNA}	{PF13442:Cytochrome C oxidase, cbb3-type, subunit III PF00034:Cytochrome c}
i0_HQ_c10352/f2p4/820	{GAU43831.1; hypothetical protein TSUD_399250 [Trifolium subterraneum]}	{sp|P27456|GSHRP_PEA; Glutathione reductase, chloroplastic/mitochondrial OS=Pisum sativum GN=GR PE=2 SV=1}	{cam:101514119; K00383 GSR, gor glutathione reductase (NADPH) 1.8.1.7 ko00480; Metabolism; Metabolism of other amino acids; Glutathione metabolism | ko04918; Organismal Systems; Endocrine system; Thyroid hormone synthesis}	{At3g54660; KOG0405 Pyridine nucleotide-disulphide oxidoreductase Q Secondary metabolites biosynthesis, transport and catabolism ;}	{GO:0045454; cell redox homeostasis; biological_process GO:0055114; oxidation-reduction process; biological_process}	{XM_013613126.1; Medicago truncatula glutathione reductase mRNA}	{PF02852:Pyridine nucleotide-disulphide oxidoreductase, dimerisation domain}
i0_HQ_c103524/f2p0/755	{XP_003628658.1; hypothetical protein MTR_8g063150 [Medicago truncatula]}	{sp|Q9XIK0|PRIN2_ARATH; Protein PLASTID REDOX INSENSITIVE 2 OS=Arabidopsis thaliana GN=PRIN2 PE=1 SV=1}	{mtr:MTR_8g063150; - - - - -}	{NA}	{NA}	{XM_003628610.2; Medicago truncatula hypothetical protein mRNA}	{NA}
i0_HQ_c10356/f4p0/482	{XP_013446216.1; RALF-like protein [Medicago truncatula]}	{NA}	{mtr:MTR_8g070055; - - - - -}	{NA}	{NA}	{XR_190051.2; PREDICTED: Cicer arietinum uncharacterized LOC101493014 (LOC101493014), ncRNA}	{NA}
i0_HQ_c103566/f3p0/852	{BAE71195.1; hypothetical protein, partial [Trifolium pratense]}	{NA}	{NA}	{NA}	{NA}	{AB236743.1; Trifolium pratense RNA for hypothetical protein, partial cds, clone: C1390}	{NA}
i0_HQ_c103631/f2p3/632	{GAU47649.1; hypothetical protein TSUD_27730 [Trifolium subterraneum]}	{sp|Q9SII5|EXOL5_ARATH; Protein EXORDIUM-like 5 OS=Arabidopsis thaliana GN=EXL5 PE=2 SV=1}	{cam:101515418; - - - - -}	{NA}	{NA}	{XM_013613309.1; Medicago truncatula phosphate-responsive 1 family protein mRNA}	{NA}
i0_HQ_c103700/f2p26/387	{NA}	{NA}	{NA}	{NA}	{NA}	{NA}	{NA}
i0_HQ_c103743/f2p32/359	{NA}	{NA}	{NA}	{NA}	{NA}	{NA}	{NA}
i0_HQ_c103768/f2p0/461	{GAU12632.1; hypothetical protein TSUD_121230 [Trifolium subterraneum]}	{sp|B3EWI4|PST2_PETHY; Photosystem II 5 kDa protein, chloroplastic OS=Petunia hybrida PE=1 SV=1}	{lja:Lj0g3v0128219.1; - - - - -}	{NA}	{GO:0008121; ubiquinol-cytochrome-c reductase activity; molecular_function GO:0055114; oxidation-reduction process; biological_process}	{XM_003599210.2; Medicago truncatula photosystem II 5 kDa protein mRNA}	{PF10399:Ubiquitinol-cytochrome C reductase Fe-S subunit TAT signal}
i0_HQ_c10388/f3p0/812	{GAU19570.1; hypothetical protein TSUD_303830 [Trifolium subterraneum]}	{sp|O65154|KIWI_ARATH; RNA polymerase II transcriptional coactivator KIWI OS=Arabidopsis thaliana GN=KIWI PE=1 SV=1}	{pxb:103946780; - - - - -}	{At5g09250; KOG2712 Transcriptional coactivator K Transcription ;}	{GO:0003713; transcription coactivator activity; molecular_function GO:0003677; DNA binding; molecular_function GO:0006355; regulation of transcription, DNA-dependent; biological_process}	{NA}	{PF02229:Transcriptional Coactivator p15 (PC4)}
i0_HQ_c103938/f2p0/974	{AAR10886.1; chlorophyll a/b binding protein [Trifolium pratense]}	{sp|P07371|CB22_PEA; Chlorophyll a-b binding protein AB80, chloroplastic OS=Pisum sativum GN=AB80 PE=1 SV=1}	{csv:101211276; K08912 LHCB1 light-harvesting complex II chlorophyll a/b binding protein 1 - ko00196; Metabolism; Energy metabolism; Photosynthesis - antenna proteins}	{NA}	{GO:0003824; NA GO:0046872; metal ion binding; molecular_function}	{AY430082.1; Trifolium pratense chlorophyll a/b binding protein mRNA, complete cds; nuclear gene for chloroplast product}	{PF10143:2,3-bisphosphoglycerate-independent phosphoglycerate mutase}
i0_HQ_c10394/f4p8/347	{NA}	{NA}	{NA}	{NA}	{NA}	{XM_004506235.2; PREDICTED: Cicer arietinum DEAD-box ATP-dependent RNA helicase 7-like (LOC101504526), mRNA}	{NA}
i0_HQ_c103941/f2p0/447	{NA}	{NA}	{NA}	{NA}	{NA}	{XM_003604421.2; Medicago truncatula translation machinery associated TMA7 protein mRNA}	{NA}
i0_HQ_c104021/f2p221/338	{CDY20228.1; BnaC09g30110D [Brassica napus]}	{NA}	{NA}	{NA}	{NA}	{KC894706.1; Trifolium repens plastid, complete genome}	{NA}
i0_HQ_c104056/f2p3/960	{NA}	{NA}	{NA}	{NA}	{NA}	{XM_003594176.2; Medicago truncatula hypothetical protein mRNA}	{NA}
i0_HQ_c104124/f2p1/559	{AAQ24852.1; 10 kDa photosystem II polypeptide [Trifolium pratense]}	{sp|Q40519|PSBR_TOBAC; Photosystem II 10 kDa polypeptide, chloroplastic OS=Nicotiana tabacum GN=PSBR PE=2 SV=1}	{cam:101505387; K03541 psbR photosystem II 10kDa protein - ko00195; Metabolism; Energy metabolism; Photosynthesis}	{NA}	{GO:0042651; thylakoid membrane; cellular_component GO:0015979; photosynthesis; biological_process GO:0009523; photosystem II; cellular_component GO:0009654; oxygen evolving complex; cellular_component}	{AY348557.1; Trifolium pratense 10 kDa photosystem II polypeptide mRNA, complete cds}	{PF04725:Photosystem II 10 kDa polypeptide PsbR}
i0_HQ_c10414/f3p1/418	{NA}	{NA}	{NA}	{NA}	{NA}	{NA}	{NA}
i0_HQ_c104217/f2p16/849	{ACB78016.1; cinnamic acid 4-hydroxylase [Trifolium pratense]}	{sp|Q43067|TCMO_PEA; Trans-cinnamate 4-monooxygenase OS=Pisum sativum GN=CYP73A9 PE=2 SV=2}	{pvu:PHAVU_008G247400g; K00487 CYP73A trans-cinnamate 4-monooxygenase 1.14.13.11 ko01220; Metabolism; Global and overview maps; Degradation of aromatic compounds | ko00360; Metabolism; Amino acid metabolism; Phenylalanine metabolism | ko00130; Metabolism; Metabolism of cofactors and vitamins; Ubiquinone and other terpenoid-quinone biosynthesis | ko00940; Metabolism; Biosynthesis of other secondar…	{At2g30490; KOG0156 Cytochrome P450 CYP2 subfamily Q Secondary metabolites biosynthesis, transport and catabolism ;}	{GO:0055114; oxidation-reduction process; biological_process GO:0005506; iron ion binding; molecular_function GO:0016705; oxidoreductase activity, acting on paired donors, with incorporation or reduction of molecular oxygen; molecular_function GO:0020037; heme binding; molecular_function}	{EU573999.1; Trifolium pratense clone MLS152 cinnamic acid 4-hydroxylase (CYP73) mRNA, complete cds}	{PF00067:Cytochrome P450}
i0_HQ_c104226/f2p1/560	{GAU21196.1; hypothetical protein TSUD_11130 [Trifolium subterraneum]}	{sp|Q9ZT05|PSAK_MEDSA; Photosystem I reaction center subunit psaK, chloroplastic OS=Medicago sativa GN=PSAK PE=2 SV=1}	{vra:106760980; K02698 psaK photosystem I subunit X - ko00195; Metabolism; Energy metabolism; Photosynthesis}	{NA}	{GO:0009522; photosystem I; cellular_component GO:0015979; photosynthesis; biological_process GO:0016020; membrane; cellular_component}	{XM_013610795.1; Medicago truncatula photosystem I reaction center subunit X psaK mRNA}	{PF01241:Photosystem I psaG / psaK}
i0_HQ_c104301/f2p7/935	{GAU38333.1; hypothetical protein TSUD_61940 [Trifolium subterraneum]}	{sp|Q7XTT4|NUCL2_ORYSJ; Nucleolin 2 OS=Oryza sativa subsp. japonica GN=Os04g0620700 PE=2 SV=2}	{pvu:PHAVU_011G030600g; K11294 NCL, NSR1 nucleolin - ko05130; Human Diseases; Infectious diseases: Bacterial; Pathogenic Escherichia coli infection}	{At1g48920; KOG4210 Nuclear localization sequence binding protein K Transcription ;}	{GO:0003676; nucleic acid binding; molecular_function}	{XM_003607191.2; Medicago truncatula RNA recognition motif mRNA}	{PF00076:RNA recognition motif. (a.k.a. RRM, RBD, or RNP domain)}
i0_HQ_c104313/f3p5/626	{GAU34963.1; hypothetical protein TSUD_312940 [Trifolium subterraneum]}	{sp|E1U332|ALL12_OLEEU; Isoflavone reductase-like protein OS=Olea europaea PE=1 SV=1}	{vra:106762582; - - - - -}	{NA}	{NA}	{XM_013606678.1; Medicago truncatula allergenic isoflavone reductase-like protein Bet protein mRNA}	{NA}
i0_HQ_c10437/f3p0/900	{NA}	{NA}	{NA}	{NA}	{NA}	{NA}	{NA}
i0_HQ_c104409/f3p0/801	{GAU30395.1; hypothetical protein TSUD_364410 [Trifolium subterraneum]}	{sp|Q9SSK5|MLP43_ARATH; MLP-like protein 43 OS=Arabidopsis thaliana GN=MLP43 PE=1 SV=1}	{mtr:MTR_8g045695; - - - - -}	{NA}	{GO:0006952; defense response; biological_process GO:0009607; response to biotic stimulus; biological_process}	{XM_013589792.1; Medicago truncatula polyketide cyclase/dehydrase and lipid transporter mRNA}	{PF00407:Pathogenesis-related protein Bet v I family}
i0_HQ_c104466/f2p3/769	{GAU51179.1; hypothetical protein TSUD_181890 [Trifolium subterraneum]}	{sp|Q41385|PSAL_SPIOL; Photosystem I reaction center subunit XI, chloroplastic OS=Spinacia oleracea GN=PSAL PE=1 SV=1}	{cam:101507573; K02699 psaL photosystem I subunit XI - ko00195; Metabolism; Energy metabolism; Photosynthesis}	{NA}	{GO:0009522; photosystem I; cellular_component GO:0015979; photosynthesis; biological_process GO:0009538; photosystem I reaction center; cellular_component}	{BT146685.1; Medicago truncatula clone JCVI-FLMt-6M13 unknown mRNA}	{PF02605:Photosystem I reaction centre subunit XI}
i0_HQ_c10449/f3p0/575	{GAU20935.1; hypothetical protein TSUD_200830 [Trifolium subterraneum]}	{NA}	{lang:109355191; - - - - -; lang:109355191; - - - - -}	{NA}	{NA}	{XM_003610211.2; Medicago truncatula transmembrane protein, putative mRNA}	{NA}
i0_HQ_c10450/f5p0/793	{GAU24000.1; hypothetical protein TSUD_328020 [Trifolium subterraneum]}	{NA}	{cam:101498703; - - - - -}	{NA}	{GO:0005891; voltage-gated calcium channel complex; cellular_component GO:0031072; heat shock protein binding; molecular_function GO:0070588; calcium ion transmembrane transport; biological_process GO:0005245; voltage-gated calcium channel activity; molecular_function GO:0051082; unfolded protein binding; molecular_function}	{XM_003624670.2; Medicago truncatula DnaJ/Hsp40 cysteine-rich domain protein, putative mRNA}	{PF00684:DnaJ central domain PF12052:Voltage gated calcium channel subunit beta domain 4Aa N terminal}
i0_HQ_c104552/f2p3/398	{XP_004512591.1; PREDICTED: chlorophyll a-b binding protein CP26, chloroplastic [Cicer arietinum]}	{sp|Q9XF89|CB5_ARATH; Chlorophyll a-b binding protein CP26, chloroplastic OS=Arabidopsis thaliana GN=LHCB5 PE=1 SV=1}	{var:108346034; K08916 LHCB5 light-harvesting complex II chlorophyll a/b binding protein 5 - ko00196; Metabolism; Energy metabolism; Photosynthesis - antenna proteins}	{NA}	{NA}	{XM_013596958.1; Medicago truncatula light-harvesting complex I chlorophyll A/B-binding protein mRNA}	{NA}
i0_HQ_c10457/f5p3/839	{XP_003613903.1; NAD(P)H dehydrogenase [Medicago truncatula]}	{sp|Q9FG89|PNSB5_ARATH; Photosynthetic NDH subunit of subcomplex B 5, chloroplastic OS=Arabidopsis thaliana GN=PNSB5 PE=2 SV=1}	{cam:101505997; - - - - -}	{NA}	{NA}	{BT141711.1; Medicago truncatula clone JCVI-FLMt-9C5 unknown mRNA}	{NA}
i0_HQ_c1046/f11p1/472	{OMP05225.1; Proteinase inhibitor I13, potato inhibitor I [Corchorus capsularis]}	{sp|P24076|BGIA_MOMCH; Glu S.griseus protease inhibitor OS=Momordica charantia PE=1 SV=1}	{mdm:103453406; - - - - -}	{NA}	{NA}	{XM_003590753.2; Medicago truncatula inhibitor of trypsin and hageman factor-like protein mRNA}	{NA}
i0_HQ_c10468/f2p0/671	{XP_004504541.1; PREDICTED: uncharacterized protein LOC101500359 [Cicer arietinum]}	{NA}	{lang:109359899; - - - - -; lang:109359899; - - - - -}	{NA}	{NA}	{XM_013591048.1; Medicago truncatula hypothetical protein mRNA}	{NA}
i0_HQ_c104688/f3p5/704	{GAU44725.1; hypothetical protein TSUD_88100 [Trifolium subterraneum]}	{sp|P04793|HSP13_SOYBN; 17.5 kDa class I heat shock protein OS=Glycine max GN=HSP17.5-M PE=3 SV=1}	{var:108319601; K13993 HSP20 HSP20 family protein - ko04141; Genetic Information Processing; Folding, sorting and degradation; Protein processing in endoplasmic reticulum}	{At3g46230; KOG0710 Molecular chaperone (small heat-shock protein Hsp26/Hsp42) O Posttranslational modification, protein turnover, chaperones ;}	{NA}	{XM_013600721.1; Medicago truncatula 17.5 kDa class I heat shock protein partial mRNA}	{NA}
i0_HQ_c104704/f2p0/952	{AAR10886.1; chlorophyll a/b binding protein [Trifolium pratense]}	{sp|P27490|CB28_PEA; Chlorophyll a-b binding protein 8, chloroplastic OS=Pisum sativum GN=CAB8 PE=1 SV=1}	{cann:107857025; - - - - -}	{NA}	{NA}	{AY430082.1; Trifolium pratense chlorophyll a/b binding protein mRNA, complete cds; nuclear gene for chloroplast product}	{NA}
i0_HQ_c10472/f4p3/821	{GAU25380.1; hypothetical protein TSUD_70330 [Trifolium subterraneum]}	{NA}	{bna:106395890; - - - - -}	{NA}	{GO:0004252; serine-type endopeptidase activity; molecular_function GO:0043086; negative regulation of catalytic activity; biological_process GO:0042802; identical protein binding; molecular_function}	{NA}	{PF05922:Peptidase inhibitor I9}
i0_HQ_c104725/f2p0/750	{NA}	{NA}	{NA}	{NA}	{NA}	{XM_003624635.2; Medicago truncatula dehydrin mRNA}	{NA}
i0_HQ_c10474/f4p0/506	{KRH11575.1; hypothetical protein GLYMA_15G117900 [Glycine max]}	{NA}	{fve:101294242; - - - - -}	{NA}	{NA}	{XM_013607472.1; Medicago truncatula hypothetical protein partial mRNA}	{NA}
i0_HQ_c104741/f2p3/657	{XP_004509876.1; PREDICTED: albumin-2-like [Cicer arietinum]}	{sp|P08688|ALB2_PEA; Albumin-2 OS=Pisum sativum PE=2 SV=1}	{cam:101499359; - - - - -}	{NA}	{NA}	{AC209530.2; Medicago truncatula chromosome 7 BAC clone mte1-84j4, complete sequence}	{NA}
i0_HQ_c104790/f2p0/591	{GAU50704.1; hypothetical protein TSUD_301090 [Trifolium subterraneum]}	{sp|O23758|NLTP_CICAR; Non-specific lipid-transfer protein OS=Cicer arietinum PE=3 SV=1}	{pvu:PHAVU_010G069100g; - - - - -}	{NA}	{NA}	{BT051321.1; Medicago truncatula clone MTYF1_F2_F3_F41G-H-6 unknown mRNA}	{NA}
i0_HQ_c104833/f2p3/744	{GAU48414.1; hypothetical protein TSUD_99290 [Trifolium subterraneum]}	{sp|Q8L9S1|R18AL_ARATH; 60S ribosomal protein L18a-like protein OS=Arabidopsis thaliana GN=At1g29970 PE=2 SV=2}	{cam:101498883; - - - - -}	{NA}	{NA}	{XM_013608977.1; Medicago truncatula transmembrane protein, putative mRNA}	{NA}
i0_HQ_c104841/f2p0/704	{GAU25835.1; hypothetical protein TSUD_30990 [Trifolium subterraneum]}	{sp|P93829|PRA1D_ARATH; PRA1 family protein D OS=Arabidopsis thaliana GN=PRA1D PE=1 SV=1}	{cam:101510136; - - - - -}	{At1g04260; KOG3142 Prenylated rab acceptor 1 U Intracellular trafficking, secretion, and vesicular transport ;}	{NA}	{XM_003591748.2; Medicago truncatula PRA1 family protein mRNA}	{NA}
i0_HQ_c10489/f3p2/385	{BAE71305.1; putative DNA-damage-repair/toleration protein DRT102 [Trifolium pratense]}	{sp|Q05212|DR102_ARATH; DNA damage-repair/toleration protein DRT102 OS=Arabidopsis thaliana GN=DRT102 PE=1 SV=2}	{cam:101496513; - - - - -}	{NA}	{NA}	{AB236853.1; Trifolium pratense RNA for putative DNA-damage-repair/toleration protein DRT102, complete cds, clone: C669}	{NA}
i0_HQ_c10490/f11p3/1011	{GAU12698.1; hypothetical protein TSUD_121890 [Trifolium subterraneum]}	{sp|P82277|RRP2_SPIOL; 30S ribosomal protein 2, chloroplastic OS=Spinacia oleracea GN=PSRP2 PE=1 SV=1}	{vra:106759845; K13126 PABPC polyadenylate-binding protein - ko03013; Genetic Information Processing; Translation; RNA transport | ko03015; Genetic Information Processing; Translation; mRNA surveillance pathway | ko03018; Genetic Information Processing; Folding, sorting and degradation; RNA degradation}	{At3g52150; KOG0118 FOG: RRM domain R General function prediction only ;}	{GO:0003676; nucleic acid binding; molecular_function GO:0005515; protein binding; molecular_function}	{XM_004515479.2; PREDICTED: Cicer arietinum 30S ribosomal protein 2, chloroplastic (LOC101513680), mRNA}	{PF00076:RNA recognition motif. (a.k.a. RRM, RBD, or RNP domain) PF00564:PB1 domain}
i0_HQ_c104904/f4p4/387	{XP_004495899.1; PREDICTED: ATP-dependent Clp protease proteolytic subunit 5, chloroplastic-like [Cicer arietinum]}	{sp|Q9S834|CLPP5_ARATH; ATP-dependent Clp protease proteolytic subunit 5, chloroplastic OS=Arabidopsis thaliana GN=CLPP5 PE=1 SV=1}	{cam:101501477; K01358 clpP, CLPP ATP-dependent Clp protease, protease subunit 3.4.21.92 ko04112; Cellular Processes; Cell growth and death; Cell cycle - Caulobacter | ko04212; Organismal Systems; Aging; Longevity regulating pathway - worm}	{At1g02560; KOG0840 ATP-dependent Clp protease, proteolytic subunit O Posttranslational modification, protein turnover, chaperones ;}	{NA}	{XM_003591344.2; Medicago truncatula ATP-dependent Clp protease proteolytic protein mRNA}	{NA}
i0_HQ_c104917/f2p4/476	{AJE71713.1; ATP synthase CF0 C subunit (plastid) [Melilotus albus]}	{sp|P08212|ATPH_PEA; ATP synthase subunit c, chloroplastic OS=Pisum sativum GN=atpH PE=1 SV=1}	{ota:OstapCp45; K02110 ATPF0C, atpE F-type H+-transporting ATPase subunit c - ko00190; Metabolism; Energy metabolism; Oxidative phosphorylation | ko00195; Metabolism; Energy metabolism; Photosynthesis}	{AtCh010; KOG0232 Vacuolar H+-ATPase V0 sector, subunits c/c' C Energy production and conversion ;}	{NA}	{FJ395288.1; Trifolium pratense voucher BM000954780 atpF-atpH intergenic spacer, partial sequence; chloroplast}	{NA}
i0_HQ_c104923/f2p2/642	{GAU25257.1; hypothetical protein TSUD_17700 [Trifolium subterraneum]}	{NA}	{NA}	{NA}	{NA}	{XM_003589997.2; Medicago truncatula hypothetical protein mRNA}	{NA}
i0_HQ_c105012/f2p20/580	{GAU21862.1; hypothetical protein TSUD_33590 [Trifolium subterraneum]}	{NA}	{NA}	{NA}	{NA}	{NA}	{NA}
i0_HQ_c10509/f2p4/781	{GAU35057.1; hypothetical protein TSUD_69800 [Trifolium subterraneum]}	{sp|O82515|MTDH_MEDSA; Probable mannitol dehydrogenase OS=Medicago sativa GN=CAD1 PE=1 SV=1}	{mtr:MTR_8g092630; K00083 E1.1.1.195 cinnamyl-alcohol dehydrogenase 1.1.1.195 ko00940; Metabolism; Biosynthesis of other secondary metabolites; Phenylpropanoid biosynthesis}	{At4g39330; KOG0023 Alcohol dehydrogenase, class V Q Secondary metabolites biosynthesis, transport and catabolism ;}	{GO:0008270; zinc ion binding; molecular_function GO:0055114; oxidation-reduction process; biological_process GO:0016491; oxidoreductase activity; molecular_function}	{XM_004503922.2; PREDICTED: Cicer arietinum probable mannitol dehydrogenase (LOC101504284), mRNA}	{PF00107:Zinc-binding dehydrogenase}
i0_HQ_c10512/f2p16/354	{NA}	{NA}	{NA}	{NA}	{NA}	{XM_004507958.2; PREDICTED: Cicer arietinum oligouridylate-binding protein 1-like (LOC101488674), mRNA}	{NA}
i0_HQ_c10513/f2p1/925	{GAU35631.1; hypothetical protein TSUD_394710 [Trifolium subterraneum]}	{sp|Q9FK07|CLPX1_ARATH; CLP protease regulatory subunit CLPX1, mitochondrial OS=Arabidopsis thaliana GN=CLPX1 PE=2 SV=1}	{gmx:100810042; K03544 clpX, CLPX ATP-dependent Clp protease ATP-binding subunit ClpX - ko04112; Cellular Processes; Cell growth and death; Cell cycle - Caulobacter}	{At5g53350; KOG0745 Putative ATP-dependent Clp-type protease (AAA+ ATPase superfamily) O Posttranslational modification, protein turnover, chaperones ;}	{GO:0005524; ATP binding; molecular_function}	{XM_003602208.2; Medicago truncatula ATP-dependent Clp protease regulatory subunit ClpX mRNA}	{PF07724:AAA domain (Cdc48 subfamily)}
i0_HQ_c10517/f2p1/683	{JAT56367.1; 60S ribosomal protein L24 [Anthurium amnicola]}	{sp|Q7SDU2|RL24_NEUCR; 60S ribosomal protein L24 OS=Neurospora crassa (strain ATCC 24698 / 74-OR23-1A / CBS 708.71 / DSM 1257 / FGSC 987) GN=rpl-24 PE=3 SV=1}	{cvr:CHLNCDRAFT_29622; K02896 RP-L24e, RPL24 large subunit ribosomal protein L24e - ko03010; Genetic Information Processing; Translation; Ribosome}	{YGL031c; KOG1722 60s ribosomal protein L24 J Translation, ribosomal structure and biogenesis ;}	{NA}	{NA}	{NA}
i0_HQ_c105213/f2p0/804	{GAU20178.1; hypothetical protein TSUD_352420 [Trifolium subterraneum]}	{sp|Q41932|PSBQ2_ARATH; Oxygen-evolving enhancer protein 3-2, chloroplastic OS=Arabidopsis thaliana GN=PSBQ2 PE=1 SV=2}	{mtr:MTR_8g005175; K08901 psbQ photosystem II oxygen-evolving enhancer protein 3 - ko00195; Metabolism; Energy metabolism; Photosynthesis}	{NA}	{GO:0015979; photosynthesis; biological_process GO:0005509; calcium ion binding; molecular_function GO:0019898; extrinsic to membrane; cellular_component GO:0009523; photosystem II; cellular_component GO:0009654; oxygen evolving complex; cellular_component}	{XM_013588294.1; Medicago truncatula oxygen-evolving enhancer protein mRNA}	{PF05757:Oxygen evolving enhancer protein 3 (PsbQ)}
i0_HQ_c105246/f3p0/722	{XP_003603843.1; plastocyanin [Medicago truncatula]}	{sp|P16002|PLAS_PEA; Plastocyanin, chloroplastic OS=Pisum sativum GN=PETE PE=3 SV=1}	{pvu:PHAVU_009G020300g; K02638 petE plastocyanin - ko00195; Metabolism; Energy metabolism; Photosynthesis}	{NA}	{GO:0005507; copper ion binding; molecular_function GO:0009055; NA}	{BT142398.1; Medicago truncatula clone JCVI-FLMt-7M24 unknown mRNA}	{PF00127:Copper binding proteins, plastocyanin/azurin family}
i0_HQ_c105335/f2p2/982	{NA}	{NA}	{NA}	{NA}	{NA}	{XM_003594176.2; Medicago truncatula hypothetical protein mRNA}	{NA}
i0_HQ_c105377/f2p1/843	{XP_013462118.1; CBS domain protein [Medicago truncatula]}	{sp|Q8RY60|Y1733_ARATH; DUF21 domain-containing protein At1g47330 OS=Arabidopsis thaliana GN=CBSDUF7 PE=1 SV=1}	{vra:106762709; K16302 CNNM metal transporter CNNM - -}	{At1g47330; KOG2118 Predicted membrane protein, contains two CBS domains S Function unknown ;}	{GO:0030554; adenyl nucleotide binding; molecular_function}	{XM_013606664.1; Medicago truncatula CBS domain protein mRNA}	{PF00571:CBS domain}
i0_HQ_c10544/f2p4/946	{XP_016736213.1; PREDICTED: ubiquitin-conjugating enzyme E2 2 isoform X1 [Gossypium hirsutum]}	{sp|P35130|UBC2_MEDSA; Ubiquitin-conjugating enzyme E2 2 OS=Medicago sativa GN=UBC2 PE=2 SV=1}	{mtr:MTR_8g468530; K10573 UBE2A, UBC2, RAD6A ubiquitin-conjugating enzyme E2 A 2.3.2.23 ko04120; Genetic Information Processing; Folding, sorting and degradation; Ubiquitin mediated proteolysis}	{At2g02760; KOG0419 Ubiquitin-protein ligase O Posttranslational modification, protein turnover, chaperones ;}	{GO:0016881; acid-amino acid ligase activity; molecular_function GO:0005515; protein binding; molecular_function}	{XM_004508710.2; PREDICTED: Cicer arietinum ubiquitin-conjugating enzyme E2 2 (LOC101489466), transcript variant X1, mRNA}	{PF05773:RWD domain PF00179:Ubiquitin-conjugating enzyme}
i0_HQ_c10548/f3p5/985	{GAU32906.1; hypothetical protein TSUD_152660 [Trifolium subterraneum]}	{sp|O80852|GSTF9_ARATH; Glutathione S-transferase F9 OS=Arabidopsis thaliana GN=GSTF9 PE=1 SV=1}	{pxb:103965717; K00799 GST, gst glutathione S-transferase 2.5.1.18 ko00480; Metabolism; Metabolism of other amino acids; Glutathione metabolism | ko00980; Metabolism; Xenobiotics biodegradation and metabolism; Metabolism of xenobiotics by cytochrome P450 | ko00982; Metabolism; Xenobiotics biodegradation and metabolism; Drug metabolism - cytochrome P450 | ko05204; Human Diseases; Cancers: Overview…	{At2g30860; KOG0867 Glutathione S-transferase O Posttranslational modification, protein turnover, chaperones ;}	{GO:0005515; protein binding; molecular_function}	{XM_013604197.1; Medicago truncatula glutathione S-transferase mRNA}	{PF13417:Glutathione S-transferase, N-terminal domain PF02798:Glutathione S-transferase, N-terminal domain PF13409:Glutathione S-transferase, N-terminal domain}
i0_HQ_c10549/f20p3/434	{XP_007131891.1; hypothetical protein PHAVU_011G050000g [Phaseolus vulgaris]}	{NA}	{pvu:PHAVU_011G050000g; - - - - -}	{NA}	{NA}	{XM_003606813.2; Medicago truncatula hypothetical protein mRNA}	{NA}
i0_HQ_c10552/f4p1/735	{XP_004511034.1; PREDICTED: prefoldin subunit 1 [Cicer arietinum]}	{sp|Q5RAM7|PFD1_PONAB; Prefoldin subunit 1 OS=Pongo abelii GN=PFDN1 PE=2 SV=1}	{pvu:PHAVU_011G206700g; K09548 PFDN1 prefoldin subunit 1 - -}	{At2g07350; KOG3501 Molecular chaperone Prefoldin, subunit 1 O Posttranslational modification, protein turnover, chaperones ;}	{GO:0015078; hydrogen ion transmembrane transporter activity; molecular_function GO:0005634; nucleus; cellular_component GO:0005496; steroid binding; molecular_function GO:0015991; ATP hydrolysis coupled proton transport; biological_process GO:0016272; prefoldin complex; cellular_component GO:0006355; regulation of transcription, DNA-dependent; biological_process GO:0006457; protein folding; biol…	{BT053363.1; Medicago truncatula clone MTYFP_FQ_FR_FS1G-B-7 unknown mRNA}	{PF01496:V-type ATPase 116kDa subunit family PF01920:Prefoldin subunit PF02155:Glucocorticoid receptor PF02996:Prefoldin subunit}
i0_HQ_c10559/f2p9/667	{GAU35373.1; hypothetical protein TSUD_57220 [Trifolium subterraneum]}	{sp|P93231|VPS41_SOLLC; Vacuolar protein sorting-associated protein 41 homolog OS=Solanum lycopersicum GN=VPS41 PE=2 SV=1}	{pvu:PHAVU_011G088100g; K20184 VPS41 vacuolar protein sorting-associated protein 41 - ko04138; Cellular Processes; Transport and catabolism; Autophagy - yeast}	{At1g08190; KOG2066 Vacuolar assembly/sorting protein VPS41 U Intracellular trafficking, secretion, and vesicular transport ;}	{NA}	{XM_013600453.1; Medicago truncatula vacuolar protein sorting protein mRNA}	{NA}
i0_HQ_c10560/f3p3/558	{XP_013457984.1; carbohydrate-binding X8 domain protein [Medicago truncatula]}	{NA}	{NA}	{NA}	{NA}	{XM_013602530.1; Medicago truncatula carbohydrate-binding X8 domain protein mRNA}	{NA}
i0_HQ_c10566/f2p5/722	{GAU23662.1; hypothetical protein TSUD_304370, partial [Trifolium subterraneum]}	{sp|P37116|NCPR_VIGRR; NADPH--cytochrome P450 reductase OS=Vigna radiata var. radiata PE=1 SV=1}	{pvu:PHAVU_008G182200g; K00327 POR NADPH-ferrihemoprotein reductase 1.6.2.4 -}	{At4g24520; KOG1158 NADP/FAD dependent oxidoreductase C Energy production and conversion ;}	{NA}	{XM_003602850.2; Medicago truncatula NADPH-cytochrome P450 family 2 reductase mRNA}	{NA}
i0_HQ_c10569/f6p5/693	{GAU34925.1; hypothetical protein TSUD_312560 [Trifolium subterraneum]}	{sp|Q94AP3|WAT1_ARATH; Protein WALLS ARE THIN 1 OS=Arabidopsis thaliana GN=WAT1 PE=1 SV=1}	{gmx:100798686; - - - - -}	{NA}	{GO:0016020; membrane; cellular_component}	{XM_004500909.2; PREDICTED: Cicer arietinum protein WALLS ARE THIN 1 (LOC101515772), mRNA}	{PF00892:EamA-like transporter family}
i0_HQ_c1057/f17p2/858	{AAX47177.2; early flowering 4 [Pisum sativum]}	{sp|O04211|ELF4_ARATH; Protein EARLY FLOWERING 4 OS=Arabidopsis thaliana GN=ELF4 PE=1 SV=1}	{vra:106757525; - - - - -}	{NA}	{GO:0044780; NA}	{AY830926.2; Pisum sativum early flowering 4 (ELF4) mRNA, complete cds}	{PF05130:FlgN protein}
i0_HQ_c105741/f7p2/673	{GAU19311.1; hypothetical protein TSUD_335970 [Trifolium subterraneum]}	{sp|Q41228|PSAEA_NICSY; Photosystem I reaction center subunit IV A, chloroplastic OS=Nicotiana sylvestris GN=PSAEA PE=1 SV=1}	{cam:101510350; K02693 psaE photosystem I subunit IV - ko00195; Metabolism; Energy metabolism; Photosynthesis}	{NA}	{GO:0015979; photosynthesis; biological_process GO:0009522; photosystem I; cellular_component GO:0009538; photosystem I reaction center; cellular_component}	{XM_003625414.2; Medicago truncatula photosystem I reaction center subunit IV A mRNA}	{PF02427:Photosystem I reaction centre subunit IV / PsaE}
i0_HQ_c105767/f2p0/855	{XP_004498372.1; PREDICTED: ras-related protein RABC1-like isoform X1 [Cicer arietinum]}	{sp|O23657|RABC1_ARATH; Ras-related protein RABC1 OS=Arabidopsis thaliana GN=RABC1 PE=1 SV=1}	{sind:105159425; K07910 RAB18 Ras-related protein Rab-18 - -}	{At1g43890; KOG0080 GTPase Rab18, small G protein superfamily R General function prediction only ;}	{GO:0005525; GTP binding; molecular_function GO:0003924; GTPase activity; molecular_function GO:0016887; ATPase activity; molecular_function GO:0005524; ATP binding; molecular_function GO:0005634; nucleus; cellular_component GO:0007049; cell cycle; biological_process GO:0005622; intracellular; cellular_component GO:0007264; small GTPase mediated signal transduction; biological_process GO:0005737;…	{XM_013610980.1; Medicago truncatula small GTPase family RAB protein mRNA}	{PF03193:Protein of unknown function, DUF258 PF00735:Septin PF00025:ADP-ribosylation factor family PF01926:50S ribosome-binding GTPase PF08477:Ras of Complex, Roc, domain of DAPkinase PF00071:Ras family PF00005:ABC transporter PF04670:Gtr1/RagA G protein conserved region PF00009:Elongation factor Tu GTP binding domain}
i0_HQ_c10579/f3p0/990	{GAU15669.1; hypothetical protein TSUD_109270 [Trifolium subterraneum]}	{sp|Q8RUN2|LOG1_ARATH; Cytokinin riboside 5'-monophosphate phosphoribohydrolase LOG1 OS=Arabidopsis thaliana GN=LOG1 PE=1 SV=1}	{cam:101508269; K06966 K06966 uncharacterized protein - -}	{NA}	{NA}	{XM_004487038.2; PREDICTED: Cicer arietinum cytokinin riboside 5'-monophosphate phosphoribohydrolase LOG1 (LOC101508269), mRNA}	{NA}
i0_HQ_c105797/f2p1/411	{NA}	{NA}	{NA}	{NA}	{NA}	{XM_004514101.2; PREDICTED: Cicer arietinum DEAD-box ATP-dependent RNA helicase 37-like (LOC101511632), mRNA}	{NA}
i0_HQ_c10586/f2p2/857	{XP_003611861.1; CASP-like protein [Medicago truncatula]}	{sp|Q10EJ2|CSPLU_ORYSJ; CASP-like protein 5C1 OS=Oryza sativa subsp. japonica GN=Os03g0767900 PE=2 SV=1}	{var:108319155; - - - - -}	{NA}	{GO:0016020; membrane; cellular_component}	{XM_003611813.1; Medicago truncatula CASP-like protein partial mRNA}	{PF01284:Membrane-associating domain}
i0_HQ_c105864/f2p0/416	{NA}	{NA}	{NA}	{NA}	{NA}	{NA}	{NA}
i0_HQ_c105892/f2p6/481	{APZ83127.1; ATP synthase CF0 A chain (chloroplast) [Symplocarpus renifolius]}	{sp|B0Z4W3|ATPI_OENBI; ATP synthase subunit a, chloroplastic OS=Oenothera biennis GN=atpI PE=3 SV=1}	{lja:Ljclg3v0000420.1; K02108 ATPF0A, atpB F-type H+-transporting ATPase subunit a - ko00190; Metabolism; Energy metabolism; Oxidative phosphorylation | ko00195; Metabolism; Energy metabolism; Photosynthesis}	{AtCh011; KOG4665 ATP synthase F0 subunit 6 and related proteins C Energy production and conversion ;}	{NA}	{KC894706.1; Trifolium repens plastid, complete genome}	{NA}
i0_HQ_c106018/f2p0/627	{GAU25257.1; hypothetical protein TSUD_17700 [Trifolium subterraneum]}	{NA}	{NA}	{NA}	{NA}	{XM_003589997.2; Medicago truncatula hypothetical protein mRNA}	{NA}
i0_HQ_c106073/f2p8/689	{GAU25238.1; hypothetical protein TSUD_17500 [Trifolium subterraneum]}	{sp|Q9FNN5|NDUV1_ARATH; NADH dehydrogenase [ubiquinone] flavoprotein 1, mitochondrial OS=Arabidopsis thaliana GN=At5g08530 PE=2 SV=1}	{aip:107625794; K03942 NDUFV1 NADH dehydrogenase (ubiquinone) flavoprotein 1 [EC:1.6.5.3 1.6.99.3] 1.6.5.3,1.6.99.3 ko00190; Metabolism; Energy metabolism; Oxidative phosphorylation | ko05010; Human Diseases; Neurodegenerative diseases; Alzheimer's disease | ko05012; Human Diseases; Neurodegenerative diseases; Parkinson's disease | ko05016; Human Diseases; Neurodegenerative diseases; Huntington's…	{At5g08530; KOG2658 NADH:ubiquinone oxidoreductase, NDUFV1/51kDa subunit C Energy production and conversion ;}	{GO:0055114; oxidation-reduction process; biological_process}	{XM_003589913.2; Medicago truncatula NADH-ubiquinone oxidoreductase 51 kDa subunit mRNA}	{PF10589:NADH-ubiquinone oxidoreductase-F iron-sulfur binding region}
i0_HQ_c10609/f4p0/967	{GAU42029.1; hypothetical protein TSUD_90630 [Trifolium subterraneum]}	{sp|Q54XX1|SRPRB_DICDI; Signal recognition particle receptor subunit beta OS=Dictyostelium discoideum GN=srprb PE=3 SV=1}	{cam:101493468; K12272 SRPRB, SRP102 signal recognition particle receptor subunit beta - ko03060; Genetic Information Processing; Folding, sorting and degradation; Protein export}	{At5g05670; KOG0090 Signal recognition particle receptor, beta subunit (small G protein superfamily) U Intracellular trafficking, secretion, and vesicular transport ;}	{GO:0005524; ATP binding; molecular_function GO:0005634; nucleus; cellular_component GO:0019001; guanyl nucleotide binding; molecular_function GO:0016020; membrane; cellular_component GO:0005737; cytoplasm; cellular_component GO:0000103; sulfate assimilation; biological_process GO:0005198; NA GO:0003924; GTPase activity; molecular_function GO:0004020; adenylylsulfate kinase activity; molecular_fu…	{XM_003606995.2; Medicago truncatula signal recognition particle receptor subunit beta mRNA}	{PF01926:50S ribosome-binding GTPase PF00503:G-protein alpha subunit PF00025:ADP-ribosylation factor family PF01583:Adenylylsulphate kinase PF03193:Protein of unknown function, DUF258 PF03029:Conserved hypothetical ATP binding protein PF01637:ATPase domain predominantly from Archaea PF05366:Sarcolipin PF00009:Elongation factor Tu GTP binding domain PF00071:Ras family PF00005:ABC transporter PF046…
i0_HQ_c106114/f3p1/360	{NA}	{NA}	{NA}	{NA}	{NA}	{XM_003588709.2; Medicago truncatula DEAD-box ATP-dependent RNA helicase-like protein mRNA}	{NA}
i0_HQ_c106223/f2p13/931	{AAD41024.1; sucrose transport protein SUT1 [Pisum sativum]}	{sp|Q03411|SUT_SPIOL; Sucrose transport protein OS=Spinacia oleracea PE=2 SV=1}	{cam:101495868; K15378 SLC45A1_2_4 solute carrier family 45, member 1/2/4 - -}	{At1g71880; KOG0637 Sucrose transporter and related proteins G Carbohydrate transport and metabolism ;}	{NA}	{Z93774.1; V.faba mRNA for sucrose transporter}	{NA}
i0_HQ_c10627/f5p0/629	{GAU22646.1; hypothetical protein TSUD_234680 [Trifolium subterraneum]}	{NA}	{cam:101509279; - - - - -}	{NA}	{NA}	{XM_004499742.2; PREDICTED: Cicer arietinum uncharacterized LOC101499687 (LOC101499687), transcript variant X2, mRNA}	{NA}
i0_HQ_c106286/f2p0/765	{XP_003606921.1; RNA-binding (RRM/RBD/RNP motif) family protein [Medicago truncatula]}	{sp|P49310|GRP1_SINAL; Glycine-rich RNA-binding protein GRP1A OS=Sinapis alba PE=2 SV=1}	{thj:104807734; - - - - -}	{At2g21660; KOG0118 FOG: RRM domain R General function prediction only ;}	{GO:0003676; nucleic acid binding; molecular_function}	{XM_004507394.2; PREDICTED: Cicer arietinum glycine-rich RNA-binding, abscisic acid-inducible protein-like (LOC101507444), mRNA}	{PF00076:RNA recognition motif. (a.k.a. RRM, RBD, or RNP domain)}
i0_HQ_c106306/f2p7/776	{XP_003605914.1; MATE efflux family protein [Medicago truncatula]}	{sp|Q9LVD9|DTX40_ARATH; Protein DETOXIFICATION 40 OS=Arabidopsis thaliana GN=DTX40 PE=1 SV=1}	{pvu:PHAVU_011G104200g; K03327 TC.MATE, SLC47A, norM, mdtK, dinF multidrug resistance protein, MATE family - -}	{At3g21690; KOG1347 Uncharacterized membrane protein, predicted efflux pump R General function prediction only ;}	{GO:0015238; drug transmembrane transporter activity; molecular_function GO:0016020; membrane; cellular_component GO:0055085; transmembrane transport; biological_process GO:0015297; antiporter activity; molecular_function GO:0006855; drug transmembrane transport; biological_process}	{BT138540.1; Medicago truncatula clone JCVI-FLMt-20O2 unknown mRNA}	{PF01554:MatE}
i0_HQ_c106418/f2p0/625	{GAU30081.1; hypothetical protein TSUD_332500 [Trifolium subterraneum]}	{NA}	{vra:106756799; K11792 DDA1 DET1- and DDB1-associated protein 1 - -}	{At5g41560; KOG4816 Uncharacterized conserved protein S Function unknown ;}	{NA}	{XM_003625078.2; Medicago truncatula Det1 complexing ubiquitin ligase mRNA}	{NA}
i0_HQ_c10642/f4p0/442	{GAU49034.1; hypothetical protein TSUD_236910 [Trifolium subterraneum]}	{NA}	{NA}	{NA}	{NA}	{XM_003612653.2; Medicago truncatula transmembrane protein, putative mRNA}	{NA}
i0_HQ_c106550/f2p3/448	{XP_003616098.2; cystathionine beta-synthase (CBS) family protein [Medicago truncatula]}	{sp|Q9LEV3|CBSX3_ARATH; CBS domain-containing protein CBSX3, mitochondrial OS=Arabidopsis thaliana GN=CBSX3 PE=1 SV=1}	{lang:109361010; - - - - -; lang:109361010; - - - - -}	{NA}	{NA}	{CU459032.2; Medicago truncatula chromosome 5 clone mth4-20f20, COMPLETE SEQUENCE}	{NA}
i0_HQ_c10662/f2p7/994	{GAU21615.1; hypothetical protein TSUD_250980 [Trifolium subterraneum]}	{sp|O24606|EIN3_ARATH; Protein ETHYLENE INSENSITIVE 3 OS=Arabidopsis thaliana GN=EIN3 PE=1 SV=1}	{cam:101513007; K14514 EIN3 ethylene-insensitive protein 3 - ko04016; Environmental Information Processing; Signal transduction; MAPK signaling pathway - plant | ko04075; Environmental Information Processing; Signal transduction; Plant hormone signal transduction}	{NA}	{NA}	{XM_003617038.2; Medicago truncatula ethylene insensitive transcription factor mRNA}	{NA}
i0_HQ_c10663/f9p0/543	{GAU14625.1; hypothetical protein TSUD_96890 [Trifolium subterraneum]}	{NA}	{NA}	{NA}	{NA}	{XM_003606474.2; Medicago truncatula hypothetical protein mRNA}	{NA}
i0_HQ_c106630/f2p2/908	{GAU29286.1; hypothetical protein TSUD_226570 [Trifolium subterraneum]}	{sp|Q9LD45|BI1_ARATH; Bax inhibitor 1 OS=Arabidopsis thaliana GN=BI-1 PE=1 SV=1}	{aip:107629393; - - - - -}	{At5g47120; KOG1629 Bax-mediated apoptosis inhibitor TEGT/BI-1 V Defense mechanisms ;}	{NA}	{XM_004511677.2; PREDICTED: Cicer arietinum bax inhibitor 1 (LOC101488703), mRNA}	{NA}
i0_HQ_c10669/f7p0/771	{GAU13713.1; hypothetical protein TSUD_348170 [Trifolium subterraneum]}	{sp|Q8LCA1|CUT1B_ARATH; Protein CURVATURE THYLAKOID 1B, chloroplastic OS=Arabidopsis thaliana GN=CURT1B PE=1 SV=2}	{cam:101499472; - - - - -}	{NA}	{GO:0006725; cellular aromatic compound metabolic process; biological_process GO:0016853; isomerase activity; molecular_function}	{XM_004494817.2; PREDICTED: Cicer arietinum protein CURVATURE THYLAKOID 1B, chloroplastic-like (LOC101499472), mRNA}	{PF01361:Tautomerase enzyme}
i0_HQ_c1067/f4p0/792	{GAU51179.1; hypothetical protein TSUD_181890 [Trifolium subterraneum]}	{sp|Q39654|PSAL_CUCSA; Photosystem I reaction center subunit XI, chloroplastic OS=Cucumis sativus GN=PSAL PE=2 SV=1}	{cam:101507573; K02699 psaL photosystem I subunit XI - ko00195; Metabolism; Energy metabolism; Photosynthesis}	{NA}	{GO:0009522; photosystem I; cellular_component GO:0015979; photosynthesis; biological_process GO:0009538; photosystem I reaction center; cellular_component}	{XM_003624114.2; Medicago truncatula photosystem I reaction center subunit XI mRNA}	{PF02605:Photosystem I reaction centre subunit XI}
i0_HQ_c10671/f5p1/526	{NA}	{NA}	{NA}	{NA}	{NA}	{NA}	{NA}
i0_HQ_c106726/f2p1/606	{XP_013455191.1; Lipid transfer protein, partial [Medicago truncatula]}	{sp|O23758|NLTP_CICAR; Non-specific lipid-transfer protein OS=Cicer arietinum PE=3 SV=1}	{pvu:PHAVU_010G066400g; - - - - -}	{NA}	{NA}	{BT051321.1; Medicago truncatula clone MTYF1_F2_F3_F41G-H-6 unknown mRNA}	{NA}
i0_HQ_c10673/f4p0/977	{GAU18433.1; hypothetical protein TSUD_231710 [Trifolium subterraneum]}	{sp|P46604|HAT22_ARATH; Homeobox-leucine zipper protein HAT22 OS=Arabidopsis thaliana GN=HAT22 PE=1 SV=1}	{gmx:100784129; K09338 HD-ZIP homeobox-leucine zipper protein - -}	{At4g37790; KOG0483 Transcription factor HEX, contains HOX and HALZ domains K Transcription ;}	{GO:0006955; immune response; biological_process GO:0042289; MHC class II protein binding; molecular_function GO:0043565; sequence-specific DNA binding; molecular_function GO:0005634; nucleus; cellular_component GO:0019882; antigen processing and presentation; biological_process GO:0016020; membrane; cellular_component GO:0006886; intracellular protein transport; biological_process GO:0006355; re…	{BT136843.1; Medicago truncatula clone JCVI-FLMt-5I18 unknown mRNA}	{PF09307:CLIP, MHC2 interacting PF00046:Homeobox domain PF05920:Homeobox KN domain PF02183:Homeobox associated leucine zipper}
i0_HQ_c106753/f2p1/801	{GAU13921.1; hypothetical protein TSUD_262480 [Trifolium subterraneum]}	{sp|O65100|FRI3_VIGUN; Ferritin-3, chloroplastic OS=Vigna unguiculata PE=2 SV=1}	{gmx:100778273; K00522 FTH1 ferritin heavy chain 1.16.3.2 ko04978; Organismal Systems; Digestive system; Mineral absorption}	{At5g01600; KOG2332 Ferritin P Inorganic ion transport and metabolism ;}	{GO:0055114; oxidation-reduction process; biological_process GO:0008199; ferric iron binding; molecular_function GO:0046872; metal ion binding; molecular_function GO:0016491; oxidoreductase activity; molecular_function GO:0006879; cellular iron ion homeostasis; biological_process}	{XM_003604515.2; Medicago truncatula ferritin mRNA}	{PF00210:Ferritin-like domain PF02915:Rubrerythrin}
i0_HQ_c10684/f3p1/815	{GAU45005.1; hypothetical protein TSUD_87960 [Trifolium subterraneum]}	{sp|Q40193|RB11C_LOTJA; Ras-related protein Rab11C OS=Lotus japonicus GN=RAB11C PE=2 SV=1}	{aip:107629044; K07904 RAB11A Ras-related protein Rab-11A - ko04144; Cellular Processes; Transport and catabolism; Endocytosis | ko04972; Organismal Systems; Digestive system; Pancreatic secretion | ko04962; Organismal Systems; Excretory system; Vasopressin-regulated water reabsorption | ko04961; Organismal Systems; Excretory system; Endocrine and other factor-regulated calcium reabsorption}	{At1g07410; KOG0087 GTPase Rab11/YPT3, small G protein superfamily U Intracellular trafficking, secretion, and vesicular transport ;}	{GO:0005525; GTP binding; molecular_function GO:0003924; GTPase activity; molecular_function GO:0005622; intracellular; cellular_component GO:0007264; small GTPase mediated signal transduction; biological_process}	{XM_013600707.1; Medicago truncatula RAB GTPase-like protein A1D mRNA}	{PF08477:Ras of Complex, Roc, domain of DAPkinase PF00071:Ras family PF00009:Elongation factor Tu GTP binding domain PF00025:ADP-ribosylation factor family}
i0_HQ_c10688/f8p2/852	{GAU36908.1; hypothetical protein TSUD_331810 [Trifolium subterraneum]}	{sp|Q9FJ98|RPD6A_ARATH; DNA-directed RNA polymerases II, IV and V subunit 6A OS=Arabidopsis thaliana GN=NRPB6A PE=1 SV=1}	{cam:101494253; K03014 RPB6, POLR2F DNA-directed RNA polymerases I, II, and III subunit RPABC2 - ko00230; Metabolism; Nucleotide metabolism; Purine metabolism | ko00240; Metabolism; Nucleotide metabolism; Pyrimidine metabolism | ko03020; Genetic Information Processing; Transcription; RNA polymerase | ko04623; Organismal Systems; Immune system; Cytosolic DNA-sensing pathway | ko05016; Human Diseas…	{At5g51940; KOG3405 RNA polymerase subunit K K Transcription ;}	{GO:0003677; DNA binding; molecular_function GO:0006351; transcription, DNA-dependent; biological_process GO:0003899; DNA-directed RNA polymerase activity; molecular_function}	{XM_003625143.2; Medicago truncatula DNA-directed RNA polymerase I, II mRNA}	{PF01192:RNA polymerase Rpb6 }
i0_HQ_c106900/f2p1/939	{XP_003615264.1; MADS box interactor-like protein, putative [Medicago truncatula]}	{NA}	{cam:101498462; - - - - -}	{NA}	{NA}	{XM_004490373.2; PREDICTED: Cicer arietinum uncharacterized LOC101498462 (LOC101498462), mRNA}	{NA}
i0_HQ_c10704/f5p9/514	{GAU28938.1; hypothetical protein TSUD_59490 [Trifolium subterraneum]}	{sp|P33083|AX6B_SOYBN; Auxin-induced protein 6B OS=Glycine max PE=2 SV=1}	{pvu:PHAVU_011G131600g; K14488 SAUR SAUR family protein - ko04075; Environmental Information Processing; Signal transduction; Plant hormone signal transduction}	{NA}	{NA}	{AC148242.14; Medicago truncatula clone mth2-18f6, complete sequence}	{NA}
i0_HQ_c107067/f2p3/312	{GAU22272.1; hypothetical protein TSUD_260720 [Trifolium subterraneum]}	{NA}	{lang:109348994; - - - - -; lang:109348994; - - - - -}	{NA}	{NA}	{BT052481.1; Medicago truncatula clone MTYFD_FE_FF_FG1G-A-6 unknown mRNA}	{NA}
i0_HQ_c107082/f2p3/765	{XP_003597635.1; 60S ribosomal L28-like protein [Medicago truncatula]}	{sp|Q9M0E2|RL282_ARATH; 60S ribosomal protein L28-2 OS=Arabidopsis thaliana GN=RPL28C PE=2 SV=1}	{cam:101502905; K02903 RP-L28e, RPL28 large subunit ribosomal protein L28e - ko03010; Genetic Information Processing; Translation; Ribosome}	{At4g29410; KOG3412 60S ribosomal protein L28 J Translation, ribosomal structure and biogenesis ;}	{NA}	{XM_003597587.2; Medicago truncatula 60S ribosomal L28-like protein mRNA}	{NA}
i0_HQ_c107088/f2p0/474	{GAU27445.1; hypothetical protein TSUD_161310 [Trifolium subterraneum]}	{sp|Q9FFF5|ALFL1_ARATH; PHD finger protein ALFIN-LIKE 1 OS=Arabidopsis thaliana GN=AL1 PE=1 SV=1}	{pvu:PHAVU_008G103200g; - - - - -}	{At5g05610; KOG1632 Uncharacterized PHD Zn-finger protein R General function prediction only ;}	{NA}	{XM_013593691.1; Medicago truncatula PHD finger alfin-like protein mRNA}	{NA}
i0_HQ_c107114/f2p0/799	{GAU20178.1; hypothetical protein TSUD_352420 [Trifolium subterraneum]}	{sp|Q41932|PSBQ2_ARATH; Oxygen-evolving enhancer protein 3-2, chloroplastic OS=Arabidopsis thaliana GN=PSBQ2 PE=1 SV=2}	{mtr:MTR_8g005175; K08901 psbQ photosystem II oxygen-evolving enhancer protein 3 - ko00195; Metabolism; Energy metabolism; Photosynthesis}	{NA}	{GO:0015979; photosynthesis; biological_process GO:0005509; calcium ion binding; molecular_function GO:0019898; extrinsic to membrane; cellular_component GO:0009523; photosystem II; cellular_component GO:0009654; oxygen evolving complex; cellular_component}	{XM_013588294.1; Medicago truncatula oxygen-evolving enhancer protein mRNA}	{PF05757:Oxygen evolving enhancer protein 3 (PsbQ)}
i0_HQ_c10712/f3p7/459	{NA}	{NA}	{NA}	{NA}	{NA}	{AC151621.20; Medicago truncatula clone mth2-14p3, complete sequence}	{NA}
i0_HQ_c107128/f3p0/808	{GAU51179.1; hypothetical protein TSUD_181890 [Trifolium subterraneum]}	{sp|Q39654|PSAL_CUCSA; Photosystem I reaction center subunit XI, chloroplastic OS=Cucumis sativus GN=PSAL PE=2 SV=1}	{cam:101507573; K02699 psaL photosystem I subunit XI - ko00195; Metabolism; Energy metabolism; Photosynthesis}	{NA}	{GO:0009538; photosystem I reaction center; cellular_component GO:0015979; photosynthesis; biological_process GO:0009522; photosystem I; cellular_component}	{XM_003624114.2; Medicago truncatula photosystem I reaction center subunit XI mRNA}	{PF02605:Photosystem I reaction centre subunit XI}
i0_HQ_c107134/f2p0/792	{GAU51179.1; hypothetical protein TSUD_181890 [Trifolium subterraneum]}	{sp|Q39654|PSAL_CUCSA; Photosystem I reaction center subunit XI, chloroplastic OS=Cucumis sativus GN=PSAL PE=2 SV=1}	{cam:101507573; K02699 psaL photosystem I subunit XI - ko00195; Metabolism; Energy metabolism; Photosynthesis}	{NA}	{GO:0009522; photosystem I; cellular_component GO:0015979; photosynthesis; biological_process GO:0009538; photosystem I reaction center; cellular_component}	{BT146685.1; Medicago truncatula clone JCVI-FLMt-6M13 unknown mRNA}	{PF02605:Photosystem I reaction centre subunit XI}
i0_HQ_c10715/f2p0/555	{XP_004496181.1; PREDICTED: cytochrome P450 77A3-like [Cicer arietinum]}	{sp|O48928|C77A3_SOYBN; Cytochrome P450 77A3 OS=Glycine max GN=CYP77A3 PE=2 SV=1}	{cam:101513914; - - - - -}	{At5g04660; KOG0156 Cytochrome P450 CYP2 subfamily Q Secondary metabolites biosynthesis, transport and catabolism ;}	{GO:0005506; iron ion binding; molecular_function GO:0055114; oxidation-reduction process; biological_process GO:0020037; heme binding; molecular_function GO:0016705; oxidoreductase activity, acting on paired donors, with incorporation or reduction of molecular oxygen; molecular_function}	{XM_013613931.1; Medicago truncatula cytochrome P450 family 87 protein mRNA}	{PF00067:Cytochrome P450}
i0_HQ_c10716/f3p3/731	{XP_013450699.1; ferredoxin-thioredoxin reductase, variable chain [Medicago truncatula]}	{sp|P80680|FTRV_MAIZE; Ferredoxin-thioredoxin reductase, variable chain OS=Zea mays PE=1 SV=1}	{cam:101500388; - - - - -}	{At5g08410; KOG2672 Lipoate synthase H Coenzyme transport and metabolism ;}	{GO:0015979; photosynthesis; biological_process}	{XM_013595245.1; Medicago truncatula ferredoxin-thioredoxin reductase, variable chain mRNA}	{PF02941:Ferredoxin thioredoxin reductase variable alpha chain}
i0_HQ_c107161/f3p0/703	{XP_004500252.1; PREDICTED: nudC domain-containing protein 2 [Cicer arietinum]}	{sp|Q9CQ48|NUDC2_MOUSE; NudC domain-containing protein 2 OS=Mus musculus GN=Nudcd2 PE=1 SV=1}	{aip:107607131; - - - - -}	{At5g58740; KOG2265 Nuclear distribution protein NUDC T Signal transduction mechanisms ;}	{NA}	{BT139228.1; Medicago truncatula clone JCVI-FLMt-1H20 unknown mRNA}	{NA}
i0_HQ_c107193/f2p4/923	{XP_010112784.1; Metal transporter Nramp5 [Morus notabilis]}	{NA}	{ath:AT2G07706; - - - - -}	{NA}	{NA}	{KC894706.1; Trifolium repens plastid, complete genome}	{NA}
i0_HQ_c1072/f26p3/810	{XP_003621282.2; hypothetical protein MTR_7g011390 [Medicago truncatula]}	{NA}	{mtr:MTR_7g011390; - - - - -}	{NA}	{NA}	{XM_003621234.2; Medicago truncatula hypothetical protein mRNA}	{NA}
i0_HQ_c107223/f2p2/971	{GAU15057.1; hypothetical protein TSUD_07950, partial [Trifolium subterraneum]}	{sp|Q8W487|YB95_ARATH; Uncharacterized protein At2g39795, mitochondrial OS=Arabidopsis thaliana GN=At2g39795 PE=1 SV=1}	{pxb:103953840; K15414 C1QBP complement component 1 Q subcomponent-binding protein, mitochondrial - ko05168; Human Diseases; Infectious diseases: Viral; Herpes simplex infection}	{NA}	{GO:0005759; mitochondrial matrix; cellular_component}	{XM_013610376.1; Medicago truncatula glycoprotein family protein mRNA}	{PF02330:Mitochondrial glycoprotein}
i0_HQ_c10725/f2p6/529	{GAU20169.1; hypothetical protein TSUD_352330 [Trifolium subterraneum]}	{sp|Q9SAA9|CP511_ARATH; Sterol 14-demethylase OS=Arabidopsis thaliana GN=CYP51G1 PE=1 SV=1}	{mtr:MTR_8g006495; K05917 CYP51 sterol 14-demethylase 1.14.13.70 ko00100; Metabolism; Lipid metabolism; Steroid biosynthesis}	{At1g11680; KOG0684 Cytochrome P450 Q Secondary metabolites biosynthesis, transport and catabolism ;}	{GO:0016705; oxidoreductase activity, acting on paired donors, with incorporation or reduction of molecular oxygen; molecular_function GO:0020037; heme binding; molecular_function GO:0055114; oxidation-reduction process; biological_process GO:0005506; iron ion binding; molecular_function}	{XM_004510062.2; PREDICTED: Cicer arietinum obtusifoliol 14-alpha demethylase (LOC101504867), mRNA}	{PF00067:Cytochrome P450}
i0_HQ_c107251/f2p1/565	{AFK45882.1; unknown [Medicago truncatula]}	{NA}	{lja:Lj0g3v0218119.1; - - - - -}	{NA}	{NA}	{XM_013611268.1; Medicago truncatula hypothetical protein mRNA}	{NA}
i0_HQ_c10730/f8p3/989	{XP_004506611.1; PREDICTED: protein LOW PSII ACCUMULATION 2, chloroplastic isoform X1 [Cicer arietinum]}	{sp|F4KDA6|LPA2_ARATH; Protein LOW PSII ACCUMULATION 2, chloroplastic OS=Arabidopsis thaliana GN=LPA2 PE=1 SV=1}	{aip:107629736; - - - - -}	{At5g51540; KOG2090 Metalloendopeptidase family - mitochondrial intermediate peptidase O Posttranslational modification, protein turnover, chaperones ;}	{GO:0016021; integral to membrane; cellular_component GO:0055085; transmembrane transport; biological_process}	{XM_013599870.1; Medicago truncatula low psii accumulation protein, putative partial mRNA}	{PF03547:Membrane transport protein}
i0_HQ_c107312/f2p0/673	{XP_013467169.1; seven in absentia family protein [Medicago truncatula]}	{sp|P0CH27|RL402_TRYCR; Ubiquitin-60S ribosomal protein L40 OS=Trypanosoma cruzi PE=2 SV=1}	{mtr:MTR_8g479250; K08770 UBC ubiquitin C - ko03320; Organismal Systems; Endocrine system; PPAR signaling pathway}	{At4g02890; KOG0001 Ubiquitin and ubiquitin-like proteins OR Posttranslational modification, protein turnover, chaperones ; General function prediction only ;}	{GO:0005515; protein binding; molecular_function}	{XM_003615345.2; Medicago truncatula seven in absentia family protein mRNA}	{PF00240:Ubiquitin family}
i0_HQ_c10733/f2p0/823	{GAU23421.1; hypothetical protein TSUD_331190 [Trifolium subterraneum]}	{sp|Q01417|PM1_SOYBN; 18 kDa seed maturation protein OS=Glycine max GN=GMPM1 PE=2 SV=1}	{vra:106757370; - - - - -}	{NA}	{GO:0009790; embryo development; biological_process}	{XM_003625210.2; Medicago truncatula seed maturation protein mRNA}	{PF03760:Late embryogenesis abundant (LEA) group 1 }
i0_HQ_c10734/f2p1/492	{XP_013446327.1; high mobility group (HMG)-box protein [Medicago truncatula]}	{sp|P40620|HMGL_VICFA; HMG1/2-like protein OS=Vicia faba PE=2 SV=1}	{mtr:MTR_8g073345; - - - - -}	{At1g20690_2; KOG0381 HMG box-containing protein R General function prediction only ;}	{GO:0005515; protein binding; molecular_function GO:0005515; protein binding; molecular_function}	{XM_013590872.1; Medicago truncatula high mobility group (HMG)-box protein mRNA}	{PF00041:Fibronectin type III domain PF00041:Fibronectin type III domain}
i0_HQ_c10737/f2p0/421	{GAU15856.1; hypothetical protein TSUD_40770 [Trifolium subterraneum]}	{sp|Q8W4H7|EF1A2_ARATH; Elongation factor 1-alpha 2 OS=Arabidopsis thaliana GN=A2 PE=1 SV=2}	{atr:18436151; K03231 EEF1A elongation factor 1-alpha - ko03013; Genetic Information Processing; Translation; RNA transport | ko05134; Human Diseases; Infectious diseases: Bacterial; Legionellosis}	{At1g07930; KOG0052 Translation elongation factor EF-1 alpha/Tu J Translation, ribosomal structure and biogenesis ;}	{NA}	{XM_013614041.1; Medicago truncatula GTP-binding elongation factor Tu family protein mRNA}	{NA}
i0_HQ_c107387/f2p1/463	{XP_013464784.1; wound-responsive family protein [Medicago truncatula]}	{NA}	{cam:101497786; - - - - -}	{NA}	{NA}	{XM_013609330.1; Medicago truncatula wound-responsive family protein mRNA}	{NA}
i0_HQ_c1074/f14p0/893	{XP_013461320.1; NAD(P)H-quinone oxidoreductase subunit M [Medicago truncatula]}	{sp|A7NVJ4|NDHM_VITVI; NAD(P)H-quinone oxidoreductase subunit M, chloroplastic OS=Vitis vinifera GN=ndhM PE=2 SV=1}	{gmx:100794966; - - - - -}	{NA}	{GO:0055114; oxidation-reduction process; biological_process GO:0016655; oxidoreductase activity, acting on NADH or NADPH, quinone or similar compound as acceptor; molecular_function}	{XM_013605866.1; Medicago truncatula NAD(P)H-quinone oxidoreductase subunit M mRNA}	{PF10664:Cyanobacterial and plastid NDH-1 subunit M}
i0_HQ_c107408/f2p0/324	{NA}	{NA}	{NA}	{NA}	{NA}	{XM_019588629.1; PREDICTED: Lupinus angustifolius uncharacterized LOC109348268 (LOC109348268), transcript variant X2, mRNA}	{NA}
i0_HQ_c107415/f2p0/748	{XP_003606921.1; RNA-binding (RRM/RBD/RNP motif) family protein [Medicago truncatula]}	{sp|P49310|GRP1_SINAL; Glycine-rich RNA-binding protein GRP1A OS=Sinapis alba PE=2 SV=1}	{thj:104807734; - - - - -}	{At2g21660; KOG0118 FOG: RRM domain R General function prediction only ;}	{GO:0003676; nucleic acid binding; molecular_function}	{XM_004507394.2; PREDICTED: Cicer arietinum glycine-rich RNA-binding, abscisic acid-inducible protein-like (LOC101507444), mRNA}	{PF00076:RNA recognition motif. (a.k.a. RRM, RBD, or RNP domain)}
i0_HQ_c107437/f2p0/679	{GAU12687.1; hypothetical protein TSUD_121790 [Trifolium subterraneum]}	{sp|Q66GR3|BH130_ARATH; Transcription factor bHLH130 OS=Arabidopsis thaliana GN=BHLH130 PE=1 SV=1}	{vra:106762847; - - - - -}	{NA}	{GO:0046983; protein dimerization activity; molecular_function}	{XM_004515537.2; PREDICTED: Cicer arietinum transcription factor bHLH130-like (LOC101515539), mRNA}	{PF00010:Helix-loop-helix DNA-binding domain}
i0_HQ_c10746/f3p4/354	{NA}	{NA}	{NA}	{NA}	{NA}	{XM_004508452.2; PREDICTED: Cicer arietinum protein NRT1/ PTR FAMILY 6.2 (LOC101513969), mRNA}	{NA}
i0_HQ_c107466/f3p1/697	{XP_003603843.1; plastocyanin [Medicago truncatula]}	{sp|P16002|PLAS_PEA; Plastocyanin, chloroplastic OS=Pisum sativum GN=PETE PE=3 SV=1}	{pvu:PHAVU_009G020300g; K02638 petE plastocyanin - ko00195; Metabolism; Energy metabolism; Photosynthesis}	{NA}	{GO:0009055; NA GO:0005507; copper ion binding; molecular_function}	{BT142398.1; Medicago truncatula clone JCVI-FLMt-7M24 unknown mRNA}	{PF00127:Copper binding proteins, plastocyanin/azurin family}
i0_HQ_c10748/f2p2/911	{XP_003612658.1; 50S ribosomal protein L35 [Medicago truncatula]}	{NA}	{gra:105791872; - - - - -}	{NA}	{GO:0006412; translation; biological_process GO:0005622; intracellular; cellular_component GO:0019028; viral capsid; cellular_component GO:0003735; structural constituent of ribosome; molecular_function GO:0005198; NA GO:0005840; ribosome; cellular_component}	{XM_004512390.2; PREDICTED: Cicer arietinum uncharacterized LOC101502418 (LOC101502418), mRNA}	{PF01632:Ribosomal protein L35 PF07781:Reovirus minor core protein Mu-2}
i0_HQ_c10753/f2p0/424	{GAU44036.1; hypothetical protein TSUD_349680 [Trifolium subterraneum]}	{sp|Q5XF03|GPAT8_ARATH; Probable glycerol-3-phosphate acyltransferase 8 OS=Arabidopsis thaliana GN=GPAT8 PE=2 SV=1}	{mtr:MTR_8g030620; K13508 GPAT glycerol-3-phosphate acyltransferase 2.3.1.15,2.3.1.198 ko00561; Metabolism; Lipid metabolism; Glycerolipid metabolism | ko00564; Metabolism; Lipid metabolism; Glycerophospholipid metabolism}	{NA}	{NA}	{XM_004510719.2; PREDICTED: Cicer arietinum probable glycerol-3-phosphate acyltransferase 8 (LOC101504751), mRNA}	{NA}
i0_HQ_c10754/f4p0/736	{GAU21671.1; hypothetical protein TSUD_251550 [Trifolium subterraneum]}	{NA}	{cam:101498229; - - - - -}	{NA}	{GO:0008093; cytoskeletal adaptor activity; molecular_function GO:0007165; signal transduction; biological_process GO:0046847; filopodium assembly; biological_process GO:0017124; SH3 domain binding; molecular_function}	{XM_004491163.2; PREDICTED: Cicer arietinum uncharacterized LOC101498229 (LOC101498229), mRNA}	{PF08397:IRSp53/MIM homology domain}
i0_HQ_c10760/f5p3/794	{XP_003603759.1; gibberellin-regulated family protein [Medicago truncatula]}	{sp|Q93X17|SNAK2_SOLTU; Snakin-2 OS=Solanum tuberosum GN=SN2 PE=1 SV=1}	{lang:109357753; - - - - -; lang:109357753; - - - - -}	{NA}	{NA}	{XM_003603711.1; Medicago truncatula gibberellin-regulated family protein mRNA}	{NA}
i0_HQ_c107629/f2p2/410	{NA}	{NA}	{NA}	{NA}	{NA}	{NA}	{NA}
i0_HQ_c1077/f18p1/654	{XP_003626592.1; 60S acidic ribosomal protein [Medicago truncatula]}	{sp|O23095|RLA12_ARATH; 60S acidic ribosomal protein P1-2 OS=Arabidopsis thaliana GN=RPP1B PE=1 SV=2}	{cam:101496948; K02942 RP-LP1, RPLP1 large subunit ribosomal protein LP1 - ko03010; Genetic Information Processing; Translation; Ribosome}	{At5g24510; KOG1762 60s acidic ribosomal protein P1 J Translation, ribosomal structure and biogenesis ;}	{GO:0006414; translational elongation; biological_process GO:0005840; ribosome; cellular_component GO:0005622; intracellular; cellular_component GO:0003735; structural constituent of ribosome; molecular_function}	{XM_004494809.2; PREDICTED: Cicer arietinum 60S acidic ribosomal protein P1-3-like (LOC101496948), mRNA}	{PF00428:60s Acidic ribosomal protein}
i0_HQ_c10773/f2p2/819	{XP_003629179.1; adipocyte plasma membrane-associated-like protein [Medicago truncatula]}	{sp|Q9CAZ7|SSL5_ARATH; Protein STRICTOSIDINE SYNTHASE-LIKE 5 OS=Arabidopsis thaliana GN=SSL5 PE=2 SV=1}	{mtr:MTR_8g074170; - - - - -}	{At3g51440; KOG1520 Predicted alkaloid synthase/Surface mucin Hemomucin R General function prediction only ;}	{GO:0009058; biosynthetic process; biological_process GO:0005515; protein binding; molecular_function GO:0016844; strictosidine synthase activity; molecular_function GO:0004064; arylesterase activity; molecular_function}	{XM_003629131.2; Medicago truncatula adipocyte plasma membrane-associated-like protein partial mRNA}	{PF03088:Strictosidine synthase PF01731:Arylesterase PF01436:NHL repeat}
i0_HQ_c107799/f2p2/662	{GAU50704.1; hypothetical protein TSUD_301090 [Trifolium subterraneum]}	{sp|O23758|NLTP_CICAR; Non-specific lipid-transfer protein OS=Cicer arietinum PE=3 SV=1}	{pvu:PHAVU_010G069100g; - - - - -}	{NA}	{NA}	{XM_013599737.1; Medicago truncatula Lipid transfer protein partial mRNA}	{NA}
i0_HQ_c10783/f4p10/325	{NA}	{NA}	{NA}	{NA}	{NA}	{NA}	{NA}
i0_HQ_c107875/f2p2/305	{NA}	{NA}	{NA}	{NA}	{NA}	{NA}	{NA}
i0_HQ_c107886/f3p0/974	{AAR10886.1; chlorophyll a/b binding protein [Trifolium pratense]}	{sp|P07371|CB22_PEA; Chlorophyll a-b binding protein AB80, chloroplastic OS=Pisum sativum GN=AB80 PE=1 SV=1}	{csv:101211276; K08912 LHCB1 light-harvesting complex II chlorophyll a/b binding protein 1 - ko00196; Metabolism; Energy metabolism; Photosynthesis - antenna proteins}	{NA}	{NA}	{AY430082.1; Trifolium pratense chlorophyll a/b binding protein mRNA, complete cds; nuclear gene for chloroplast product}	{NA}
i0_HQ_c107934/f3p0/739	{NA}	{NA}	{NA}	{NA}	{NA}	{XM_003624635.2; Medicago truncatula dehydrin mRNA}	{NA}
i0_HQ_c10799/f5p0/981	{XP_003627006.2; DUF1677 family protein [Medicago truncatula]}	{NA}	{mtr:MTR_8g013990; - - - - -}	{NA}	{NA}	{AC166046.15; Medicago truncatula chromosome 8 clone mth2-6p7, complete sequence}	{NA}
i0_HQ_c10802/f2p5/516	{XP_003609349.1; TPR repeat protein [Medicago truncatula]}	{NA}	{var:108339052; - - - - -}	{NA}	{GO:0005515; protein binding; molecular_function}	{XM_004508429.2; PREDICTED: Cicer arietinum uncharacterized LOC101506791 (LOC101506791), mRNA}	{PF13181:Tetratricopeptide repeat PF00515:Tetratricopeptide repeat}
i0_HQ_c108062/f3p2/738	{GAU16371.1; hypothetical protein TSUD_117200 [Trifolium subterraneum]}	{sp|Q9S7N7|PSAG_ARATH; Photosystem I reaction center subunit V, chloroplastic OS=Arabidopsis thaliana GN=PSAG PE=2 SV=1}	{pmum:103344511; K08905 psaG photosystem I subunit V - ko00195; Metabolism; Energy metabolism; Photosynthesis}	{NA}	{GO:0015979; photosynthesis; biological_process GO:0009522; photosystem I; cellular_component GO:0016020; membrane; cellular_component}	{CU207236.5; M.truncatula DNA sequence from clone MTH2-56B11 on chromosome 3, complete sequence}	{PF01241:Photosystem I psaG / psaK}
i0_HQ_c108077/f3p0/830	{BAE71195.1; hypothetical protein, partial [Trifolium pratense]}	{NA}	{NA}	{NA}	{NA}	{AB236743.1; Trifolium pratense RNA for hypothetical protein, partial cds, clone: C1390}	{NA}
i0_HQ_c10808/f2p6/560	{GAU46113.1; hypothetical protein TSUD_192730 [Trifolium subterraneum]}	{sp|Q43157|RPE_SPIOL; Ribulose-phosphate 3-epimerase, chloroplastic OS=Spinacia oleracea GN=RPE PE=1 SV=1}	{aly:ARALYDRAFT_919384; K01783 rpe, RPE ribulose-phosphate 3-epimerase 5.1.3.1 ko01200; Metabolism; Global and overview maps; Carbon metabolism | ko01230; Metabolism; Global and overview maps; Biosynthesis of amino acids | ko00030; Metabolism; Carbohydrate metabolism; Pentose phosphate pathway | ko00040; Metabolism; Carbohydrate metabolism; Pentose and glucuronate interconversions | ko00710; Meta…	{At5g61410; KOG3111 D-ribulose-5-phosphate 3-epimerase G Carbohydrate transport and metabolism ;}	{NA}	{BT149062.1; Medicago truncatula clone JCVI-FLMt-6D19 unknown mRNA}	{NA}
i0_HQ_c108085/f2p1/629	{GAU50704.1; hypothetical protein TSUD_301090 [Trifolium subterraneum]}	{sp|O23758|NLTP_CICAR; Non-specific lipid-transfer protein OS=Cicer arietinum PE=3 SV=1}	{pvu:PHAVU_010G069100g; - - - - -}	{NA}	{NA}	{BT051321.1; Medicago truncatula clone MTYF1_F2_F3_F41G-H-6 unknown mRNA}	{NA}
i0_HQ_c1081/f14p0/507	{GAU11827.1; hypothetical protein TSUD_75780 [Trifolium subterraneum]}	{NA}	{var:108322932; - - - - -}	{NA}	{NA}	{XM_013591802.1; Medicago truncatula hypothetical protein mRNA}	{NA}
i0_HQ_c10810/f2p0/356	{ACJ83643.1; unknown [Medicago truncatula]}	{NA}	{aip:107640438; K07297 ADIPOR adiponectin receptor - ko04152; Environmental Information Processing; Signal transduction; AMPK signaling pathway | ko04920; Organismal Systems; Endocrine system; Adipocytokine signaling pathway | ko04211; Organismal Systems; Aging; Longevity regulating pathway | ko04932; Human Diseases; Endocrine and metabolic diseases; Non-alcoholic fatty liver disease (NAFLD)}	{NA}	{NA}	{XM_003609380.2; Medicago truncatula hemolysin-III-like protein mRNA}	{NA}
i0_HQ_c108108/f3p0/969	{AAR10886.1; chlorophyll a/b binding protein [Trifolium pratense]}	{sp|P27490|CB28_PEA; Chlorophyll a-b binding protein 8, chloroplastic OS=Pisum sativum GN=CAB8 PE=1 SV=1}	{var:108319415; K08912 LHCB1 light-harvesting complex II chlorophyll a/b binding protein 1 - ko00196; Metabolism; Energy metabolism; Photosynthesis - antenna proteins}	{NA}	{NA}	{AY430082.1; Trifolium pratense chlorophyll a/b binding protein mRNA, complete cds; nuclear gene for chloroplast product}	{NA}
i0_HQ_c108113/f2p1/985	{AAR10886.1; chlorophyll a/b binding protein [Trifolium pratense]}	{sp|P07371|CB22_PEA; Chlorophyll a-b binding protein AB80, chloroplastic OS=Pisum sativum GN=AB80 PE=1 SV=1}	{csv:101211276; K08912 LHCB1 light-harvesting complex II chlorophyll a/b binding protein 1 - ko00196; Metabolism; Energy metabolism; Photosynthesis - antenna proteins}	{NA}	{NA}	{AY430082.1; Trifolium pratense chlorophyll a/b binding protein mRNA, complete cds; nuclear gene for chloroplast product}	{NA}
i0_HQ_c108142/f3p3/720	{XP_004509874.1; PREDICTED: uncharacterized protein At4g14342 [Cicer arietinum]}	{sp|P58728|SF3BB_ARATH; Uncharacterized protein At4g14342 OS=Arabidopsis thaliana GN=At4g14342 PE=3 SV=1}	{mtr:MTR_8g062750; K12832 SF3B5, SF3B10 splicing factor 3B subunit 5 - ko03040; Genetic Information Processing; Transcription; Spliceosome}	{At3g23320_2; KOG3485 Uncharacterized conserved protein S Function unknown ;}	{NA}	{XM_004502021.2; PREDICTED: Cicer arietinum uncharacterized protein At4g14342-like (LOC101488324), mRNA}	{NA}
i0_HQ_c1082/f2p2/528	{KRH58770.1; hypothetical protein GLYMA_05G147300 [Glycine max]}	{NA}	{mtr:MTR_8g080630; - - - - -}	{NA}	{NA}	{XM_004504383.2; PREDICTED: Cicer arietinum uncharacterized LOC101492001 (LOC101492001), transcript variant X2, mRNA}	{NA}
i0_HQ_c108210/f2p0/751	{XP_003616815.1; leguminosin group485 secreted peptide [Medicago truncatula]}	{sp|Q07202|CORA_MEDSA; Cold and drought-regulated protein CORA OS=Medicago sativa GN=CORA PE=2 SV=1}	{cam:101505079; - - - - -}	{NA}	{NA}	{XM_003616764.2; Medicago truncatula leguminosin group485 secreted peptide mRNA}	{NA}
i0_HQ_c108225/f3p4/961	{GAU23128.1; hypothetical protein TSUD_305760 [Trifolium subterraneum]}	{sp|P10822|ICW3_PSOTE; Chymotrypsin inhibitor 3 OS=Psophocarpus tetragonolobus PE=1 SV=2}	{lang:109358661; - - - - -; lang:109358661; - - - - -}	{NA}	{GO:0004866; endopeptidase inhibitor activity; molecular_function GO:0004866; endopeptidase inhibitor activity; molecular_function}	{XM_013606426.1; Medicago truncatula Kunitz type trypsin inhibitor mRNA}	{PF00197:Trypsin and protease inhibitor PF00197:Trypsin and protease inhibitor}
i0_HQ_c10823/f3p2/332	{NA}	{NA}	{NA}	{NA}	{NA}	{XM_017566894.1; PREDICTED: Vigna angularis molybdate-anion transporter-like (LOC108331893), mRNA}	{NA}
i0_HQ_c108254/f3p3/640	{NA}	{NA}	{NA}	{NA}	{NA}	{KJ788285.1; Trifolium glanduliferum chloroplast, complete genome}	{NA}
i0_HQ_c10830/f2p0/952	{XP_006406166.1; hypothetical protein EUTSA_v10021310mg [Eutrema salsugineum]}	{sp|P34047|HIS5A_ARATH; Imidazoleglycerol-phosphate dehydratase 1, chloroplastic OS=Arabidopsis thaliana GN=HISN5A PE=1 SV=1}	{eus:EUTSA_v10021310mg; K01693 hisB imidazoleglycerol-phosphate dehydratase 4.2.1.19 ko01230; Metabolism; Global and overview maps; Biosynthesis of amino acids | ko00340; Metabolism; Amino acid metabolism; Histidine metabolism}	{At4g14910; KOG3143 Imidazoleglycerol-phosphate dehydratase E Amino acid transport and metabolism ;}	{NA}	{GU443965.1; Trifolium repens clone BAC 99k01 zinc knuckle (ccHc-type) family proteins, metal ion binding protein, zinc finger (GATA type) family protein, ferredoxin hydrogenase, SH3 domain-containing protein, kinesin-related protein, salt tolerance-like protein, dehydrin b, zinc-mediated transcriptional activator, 26S proteasome AAA-ATPase subunit RPT4a, inositol monophosphatase, dehydrin, and z…	{NA}
i0_HQ_c108311/f3p0/942	{OAY74251.1; Chlorophyll a-b binding protein type 2 member 1B, chloroplastic, partial [Ananas comosus]}	{sp|P07371|CB22_PEA; Chlorophyll a-b binding protein AB80, chloroplastic OS=Pisum sativum GN=AB80 PE=1 SV=1}	{var:108319415; K08912 LHCB1 light-harvesting complex II chlorophyll a/b binding protein 1 - ko00196; Metabolism; Energy metabolism; Photosynthesis - antenna proteins}	{NA}	{GO:0046872; metal ion binding; molecular_function GO:0003824; NA}	{AY430082.1; Trifolium pratense chlorophyll a/b binding protein mRNA, complete cds; nuclear gene for chloroplast product}	{PF10143:2,3-bisphosphoglycerate-independent phosphoglycerate mutase}
i0_HQ_c10834/f2p1/791	{XP_003603632.1; LRR receptor-like kinase [Medicago truncatula]}	{sp|O82318|Y2579_ARATH; Probably inactive leucine-rich repeat receptor-like protein kinase At2g25790 OS=Arabidopsis thaliana GN=At2g25790 PE=2 SV=1}	{gmx:100776180; - - - - -}	{NA}	{GO:0006468; protein phosphorylation; biological_process GO:0005524; ATP binding; molecular_function GO:0004672; protein kinase activity; molecular_function}	{XM_003603584.2; Medicago truncatula LRR receptor-like kinase mRNA}	{PF00069:Protein kinase domain PF07714:Protein tyrosine kinase}
i0_HQ_c108409/f3p0/617	{JAU18496.1; ATP synthase subunit c, chloroplastic, partial [Noccaea caerulescens]}	{sp|B5LMM9|ATPH_CICAR; ATP synthase subunit c, chloroplastic OS=Cicer arietinum GN=atpH PE=3 SV=1}	{cvr:ChvaP_p075; K02110 ATPF0C, atpE F-type H+-transporting ATPase subunit c - ko00190; Metabolism; Energy metabolism; Oxidative phosphorylation | ko00195; Metabolism; Energy metabolism; Photosynthesis}	{AtCh010; KOG0232 Vacuolar H+-ATPase V0 sector, subunits c/c' C Energy production and conversion ;}	{NA}	{KC894706.1; Trifolium repens plastid, complete genome}	{NA}
i0_HQ_c10841/f3p0/690	{GAU49468.1; hypothetical protein TSUD_91400, partial [Trifolium subterraneum]}	{NA}	{aip:107628738; - - - - -}	{NA}	{NA}	{XM_004505695.2; PREDICTED: Cicer arietinum uncharacterized LOC101511253 (LOC101511253), mRNA}	{NA}
i0_HQ_c108450/f2p4/496	{XP_003603167.1; transmembrane protein, putative [Medicago truncatula]}	{NA}	{NA}	{NA}	{NA}	{AC147430.10; Medicago truncatula chromosome 8 clone mth2-71e6, complete sequence}	{NA}
i0_HQ_c108509/f3p0/472	{NA}	{NA}	{NA}	{NA}	{NA}	{NA}	{NA}
i0_HQ_c10853/f2p0/358	{XP_013442968.1; senescence-associated protein [Medicago truncatula]}	{sp|Q6CQE5|TAR1_KLULA; Protein TAR1 OS=Kluyveromyces lactis (strain ATCC 8585 / CBS 2359 / DSM 70799 / NBRC 1267 / NRRL Y-1140 / WM37) GN=TAR1-A PE=4 SV=2}	{mtr:MTR_0055s0050; - - - - -}	{NA}	{NA}	{KU321683.1; Medicago sativa chloroplast, complete genome}	{NA}
i0_HQ_c108532/f3p1/898	{BAE71271.1; putative PSII-P protein, partial [Trifolium pratense]}	{sp|P16059|PSBP_PEA; Oxygen-evolving enhancer protein 2, chloroplastic OS=Pisum sativum GN=PSBP PE=1 SV=1}	{pvu:PHAVU_008G196500g; K02717 psbP photosystem II oxygen-evolving enhancer protein 2 - ko00195; Metabolism; Energy metabolism; Photosynthesis}	{NA}	{GO:0009654; oxygen evolving complex; cellular_component GO:0009523; photosystem II; cellular_component GO:0019898; extrinsic to membrane; cellular_component GO:0005509; calcium ion binding; molecular_function GO:0015979; photosynthesis; biological_process}	{AB236819.1; Trifolium pratense RNA for putative PSII-P protein, partial cds, clone: C214}	{PF01789:PsbP PF05757:Oxygen evolving enhancer protein 3 (PsbQ)}
i0_HQ_c10858/f2p3/941	{GAU20002.1; hypothetical protein TSUD_273370 [Trifolium subterraneum]}	{sp|Q94KL7|SILD_FORIN; Secoisolariciresinol dehydrogenase (Fragment) OS=Forsythia intermedia PE=1 SV=1}	{lang:109359385; - - - - -; lang:109359385; - - - - -}	{At1g52340; KOG0725 Reductases with broad range of substrate specificities R General function prediction only ;}	{GO:0050662; coenzyme binding; molecular_function GO:0006631; fatty acid metabolic process; biological_process GO:0016491; oxidoreductase activity; molecular_function GO:0003824; NA GO:0044237; cellular metabolic process; biological_process GO:0055114; oxidation-reduction process; biological_process GO:0003857; 3-hydroxyacyl-CoA dehydrogenase activity; molecular_function GO:0008152; NA}	{BT136120.1; Medicago truncatula clone JCVI-FLMt-5H5 unknown mRNA}	{PF01370:NAD dependent epimerase/dehydratase family PF02737:3-hydroxyacyl-CoA dehydrogenase, NAD binding domain PF00106:short chain dehydrogenase}
i0_HQ_c10863/f2p0/313	{XP_013442968.1; senescence-associated protein [Medicago truncatula]}	{sp|Q6CQE5|TAR1_KLULA; Protein TAR1 OS=Kluyveromyces lactis (strain ATCC 8585 / CBS 2359 / DSM 70799 / NBRC 1267 / NRRL Y-1140 / WM37) GN=TAR1-A PE=4 SV=2}	{mtr:MTR_0055s0050; - - - - -}	{NA}	{NA}	{KT459256.1; Vicia villosa voucher Jones_1019 26S ribosomal RNA gene, partial sequence}	{NA}
i0_HQ_c10864/f5p26/794	{BAE71229.1; putative HEAT SHOCK PROTEIN 81-2, partial [Trifolium pratense]}	{sp|P55737|HS902_ARATH; Heat shock protein 90-2 OS=Arabidopsis thaliana GN=HSP90-2 PE=1 SV=1}	{cam:101491735; K04079 HSP90A, htpG molecular chaperone HtpG - ko04141; Genetic Information Processing; Folding, sorting and degradation; Protein processing in endoplasmic reticulum | ko04151; Environmental Information Processing; Signal transduction; PI3K-Akt signaling pathway | ko04621; Organismal Systems; Immune system; NOD-like receptor signaling pathway | ko04612; Organismal Systems; Immune …	{At5g56030; KOG0019 Molecular chaperone (HSP90 family) O Posttranslational modification, protein turnover, chaperones ;}	{GO:0005524; ATP binding; molecular_function GO:0006950; response to stress; biological_process GO:0006457; protein folding; biological_process GO:0051082; unfolded protein binding; molecular_function GO:0005524; ATP binding; molecular_function GO:0051082; unfolded protein binding; molecular_function GO:0006950; response to stress; biological_process GO:0006457; protein folding; biological_proces…	{AB236777.1; Trifolium pratense RNA for putative HEAT SHOCK PROTEIN 81-2, partial cds, clone: C1601}	{PF02518:Histidine kinase-, DNA gyrase B-, and HSP90-like ATPase PF00183:Hsp90 protein PF02518:Histidine kinase-, DNA gyrase B-, and HSP90-like ATPase PF00183:Hsp90 protein}
i0_HQ_c10873/f2p3/989	{GAU24359.1; hypothetical protein TSUD_390680 [Trifolium subterraneum]}	{sp|O74978|YQL5_SCHPO; Uncharacterized RNA-binding protein C1827.05c OS=Schizosaccharomyces pombe (strain 972 / ATCC 24843) GN=SPCC1827.05c PE=4 SV=1}	{cam:101493632; K14838 NOP15 nucleolar protein 15 - -}	{At5g04600; KOG4208 Nucleolar RNA-binding protein NIFK R General function prediction only ;}	{GO:0003676; nucleic acid binding; molecular_function}	{XM_003592494.2; Medicago truncatula MKI67 interacting nucleolar phosphoprotein mRNA}	{PF00076:RNA recognition motif. (a.k.a. RRM, RBD, or RNP domain)}
i0_HQ_c108762/f3p1/983	{YP_009341764.1; ATP synthase CF0 subunit III (chloroplast) [Castanopsis concinna]}	{sp|B5LMM9|ATPH_CICAR; ATP synthase subunit c, chloroplastic OS=Cicer arietinum GN=atpH PE=3 SV=1}	{cvr:ChvaP_p075; K02110 ATPF0C, atpE F-type H+-transporting ATPase subunit c - ko00190; Metabolism; Energy metabolism; Oxidative phosphorylation | ko00195; Metabolism; Energy metabolism; Photosynthesis}	{AtCh010; KOG0232 Vacuolar H+-ATPase V0 sector, subunits c/c' C Energy production and conversion ;}	{NA}	{KC894706.1; Trifolium repens plastid, complete genome}	{NA}
i0_HQ_c108766/f2p0/756	{NA}	{NA}	{NA}	{NA}	{NA}	{KC247802.1; Trifolium repens isolate pSK7-3 KS-dehydrin mRNA, complete cds}	{NA}
i0_HQ_c108788/f2p6/951	{GAU23128.1; hypothetical protein TSUD_305760 [Trifolium subterraneum]}	{sp|P10822|ICW3_PSOTE; Chymotrypsin inhibitor 3 OS=Psophocarpus tetragonolobus PE=1 SV=2}	{vra:106767274; - - - - -}	{NA}	{GO:0004866; endopeptidase inhibitor activity; molecular_function GO:0004866; endopeptidase inhibitor activity; molecular_function}	{XM_013606426.1; Medicago truncatula Kunitz type trypsin inhibitor mRNA}	{PF00197:Trypsin and protease inhibitor PF00197:Trypsin and protease inhibitor}
i0_HQ_c108799/f2p1/742	{NA}	{NA}	{NA}	{NA}	{NA}	{XM_003624635.2; Medicago truncatula dehydrin mRNA}	{NA}
i0_HQ_c108829/f2p52/594	{GAU12104.1; hypothetical protein TSUD_00700 [Trifolium subterraneum]}	{sp|O20250|TKTC_SPIOL; Transketolase, chloroplastic OS=Spinacia oleracea PE=1 SV=1}	{cam:101511760; K00615 E2.2.1.1, tktA, tktB transketolase 2.2.1.1 ko01200; Metabolism; Global and overview maps; Carbon metabolism | ko01230; Metabolism; Global and overview maps; Biosynthesis of amino acids | ko00030; Metabolism; Carbohydrate metabolism; Pentose phosphate pathway | ko00710; Metabolism; Energy metabolism; Carbon fixation in photosynthetic organisms | ko01051; Metabolism; Metaboli…	{At2g45290; KOG0523 Transketolase G Carbohydrate transport and metabolism ;}	{NA}	{XM_019571965.1; PREDICTED: Lupinus angustifolius transketolase, chloroplastic-like (LOC109335782), transcript variant X5, mRNA}	{NA}
i0_HQ_c108851/f5p6/914	{GAU51459.1; hypothetical protein TSUD_413560 [Trifolium subterraneum]}	{sp|Q9FUS8|GSTUH_ARATH; Glutathione S-transferase U17 OS=Arabidopsis thaliana GN=GSTU17 PE=2 SV=1}	{var:108343858; K00799 GST, gst glutathione S-transferase 2.5.1.18 ko00480; Metabolism; Metabolism of other amino acids; Glutathione metabolism | ko00980; Metabolism; Xenobiotics biodegradation and metabolism; Metabolism of xenobiotics by cytochrome P450 | ko00982; Metabolism; Xenobiotics biodegradation and metabolism; Drug metabolism - cytochrome P450 | ko05204; Human Diseases; Cancers: Overview…	{At1g10360; KOG0406 Glutathione S-transferase O Posttranslational modification, protein turnover, chaperones ;}	{GO:0005515; protein binding; molecular_function GO:0006626; protein targeting to mitochondrion; biological_process GO:0005741; mitochondrial outer membrane; cellular_component}	{XM_003613452.2; Medicago truncatula glutathione S-transferase, amino-terminal domain protein mRNA}	{PF13417:Glutathione S-transferase, N-terminal domain PF10568:Outer mitochondrial membrane transport complex protein PF13409:Glutathione S-transferase, N-terminal domain PF02798:Glutathione S-transferase, N-terminal domain}
i0_HQ_c108896/f7p0/857	{XP_003597841.1; cytochrome C oxidase subunit 5b [Medicago truncatula]}	{sp|Q9SSB8|CX5B2_ARATH; Cytochrome c oxidase subunit 5b-2, mitochondrial OS=Arabidopsis thaliana GN=COX5B-2 PE=2 SV=1}	{cam:101495040; K02265 COX5B cytochrome c oxidase subunit 5b - ko00190; Metabolism; Energy metabolism; Oxidative phosphorylation | ko04260; Organismal Systems; Circulatory system; Cardiac muscle contraction | ko05010; Human Diseases; Neurodegenerative diseases; Alzheimer's disease | ko05012; Human Diseases; Neurodegenerative diseases; Parkinson's disease | ko05016; Human Diseases; Neurodegenerati…	{At1g80230; KOG3352 Cytochrome c oxidase, subunit Vb/COX4 C Energy production and conversion ;}	{GO:0005740; mitochondrial envelope; cellular_component GO:0004129; cytochrome-c oxidase activity; molecular_function}	{XM_003597793.2; Medicago truncatula cytochrome C oxidase subunit 5b mRNA}	{PF01215:Cytochrome c oxidase subunit Vb}
i0_HQ_c108899/f2p0/511	{GAU12632.1; hypothetical protein TSUD_121230 [Trifolium subterraneum]}	{sp|B3EWI4|PST2_PETHY; Photosystem II 5 kDa protein, chloroplastic OS=Petunia hybrida PE=1 SV=1}	{lja:Lj0g3v0128219.1; - - - - -}	{NA}	{GO:0008121; ubiquinol-cytochrome-c reductase activity; molecular_function GO:0055114; oxidation-reduction process; biological_process}	{XM_003599210.2; Medicago truncatula photosystem II 5 kDa protein mRNA}	{PF10399:Ubiquitinol-cytochrome C reductase Fe-S subunit TAT signal}
i0_HQ_c10892/f3p1/892	{XP_003617328.1; oxygen-evolving enhancer protein 2-1 [Medicago truncatula]}	{sp|Q42029|PSBP1_ARATH; Oxygen-evolving enhancer protein 2-1, chloroplastic OS=Arabidopsis thaliana GN=PSBP1 PE=1 SV=2}	{cam:101515625; K02717 psbP photosystem II oxygen-evolving enhancer protein 2 - ko00195; Metabolism; Energy metabolism; Photosynthesis}	{NA}	{GO:0005509; calcium ion binding; molecular_function GO:0019898; extrinsic to membrane; cellular_component GO:0015979; photosynthesis; biological_process GO:0009654; oxygen evolving complex; cellular_component GO:0009523; photosystem II; cellular_component}	{XM_003617280.2; Medicago truncatula oxygen-evolving enhancer protein 2-1 mRNA}	{PF01789:PsbP}
i0_HQ_c108937/f2p0/556	{GAU29912.1; hypothetical protein TSUD_148200 [Trifolium subterraneum]}	{NA}	{adu:107478917; - - - - -}	{NA}	{NA}	{XM_003601136.2; Medicago truncatula phloem specific protein mRNA}	{NA}
i0_HQ_c10894/f2p0/751	{GAU42712.1; hypothetical protein TSUD_382480 [Trifolium subterraneum]}	{sp|Q9LIF1|GRS10_ARATH; Monothiol glutaredoxin-S10 OS=Arabidopsis thaliana GN=GRXS10 PE=3 SV=1}	{cam:101493448; K03676 grxC, GLRX, GLRX2 glutaredoxin 3 - -}	{At4g15680; KOG1752 Glutaredoxin and related proteins O Posttranslational modification, protein turnover, chaperones ;}	{GO:0009055; NA GO:0045454; cell redox homeostasis; biological_process GO:0015035; protein disulfide oxidoreductase activity; molecular_function}	{XM_003593925.2; Medicago truncatula monothiol glutaredoxin-S2 protein mRNA}	{PF00462:Glutaredoxin}
i0_HQ_c108953/f3p6/990	{XP_013454459.1; light-harvesting complex I chlorophyll A/B-binding protein [Medicago truncatula]}	{sp|Q32904|CB23_PEA; Chlorophyll a-b binding protein 3, chloroplastic OS=Pisum sativum GN=lhca3 PE=1 SV=1}	{cam:101493704; K08909 LHCA3 light-harvesting complex I chlorophyll a/b binding protein 3 - ko00196; Metabolism; Energy metabolism; Photosynthesis - antenna proteins}	{NA}	{NA}	{XM_013599005.1; Medicago truncatula light-harvesting complex I chlorophyll A/B-binding protein mRNA}	{NA}
i0_HQ_c10904/f3p1/367	{GAU47403.1; hypothetical protein TSUD_372920 [Trifolium subterraneum]}	{sp|P48384|TRXM_PEA; Thioredoxin M-type, chloroplastic OS=Pisum sativum PE=2 SV=1}	{vra:106755572; K03671 trxA thioredoxin 1 - ko04621; Organismal Systems; Immune system; NOD-like receptor signaling pathway | ko05418; Human Diseases; Cardiovascular diseases; Fluid shear stress and atherosclerosis}	{At3g15360; KOG0910 Thioredoxin-like protein O Posttranslational modification, protein turnover, chaperones ;}	{NA}	{XM_013589946.1; Medicago truncatula thioredoxin M-type protein mRNA}	{NA}
i0_HQ_c10912/f2p0/717	{XP_014521050.1; PREDICTED: protein NSP-INTERACTING KINASE 2 [Vigna radiata var. radiata]}	{sp|Q8RY65|NIK2_ARATH; Protein NSP-INTERACTING KINASE 2 OS=Arabidopsis thaliana GN=NIK2 PE=1 SV=1}	{cam:101499536; - - - - -}	{NA}	{GO:0006468; protein phosphorylation; biological_process GO:0005524; ATP binding; molecular_function GO:0004672; protein kinase activity; molecular_function}	{XM_004490243.2; PREDICTED: Cicer arietinum protein NSP-INTERACTING KINASE 2 (LOC101499536), mRNA}	{PF07714:Protein tyrosine kinase PF00069:Protein kinase domain}
i0_HQ_c109125/f2p1/812	{GAU44116.1; hypothetical protein TSUD_124030 [Trifolium subterraneum]}	{NA}	{lang:109339102; - - - - -; lang:109339102; - - - - -}	{NA}	{NA}	{XM_004500370.2; PREDICTED: Cicer arietinum uncharacterized LOC101496111 (LOC101496111), mRNA}	{NA}
i0_HQ_c10913/f4p3/428	{NA}	{NA}	{NA}	{NA}	{NA}	{AY372368.1; Trifolium pratense actin mRNA, complete cds}	{NA}
i0_HQ_c109136/f3p21/317	{XP_020109777.1; 40S ribosomal protein S16 [Ananas comosus]}	{sp|P16149|RS16_LUPPO; 40S ribosomal protein S16 OS=Lupinus polyphyllus GN=RPS16 PE=2 SV=1}	{gmx:100812117; K02960 RP-S16e, RPS16 small subunit ribosomal protein S16e - ko03010; Genetic Information Processing; Translation; Ribosome}	{At5g18380; KOG1753 40S ribosomal protein S16 J Translation, ribosomal structure and biogenesis ;}	{NA}	{XM_004503268.2; PREDICTED: Cicer arietinum 40S ribosomal protein S16-like (LOC101512651), mRNA}	{NA}
i0_HQ_c109161/f3p7/1032	{AFK40564.1; unknown [Medicago truncatula]}	{NA}	{var:108320838; - - - - -}	{NA}	{GO:0016151; nickel ion binding; molecular_function GO:0005506; iron ion binding; molecular_function GO:0005515; protein binding; molecular_function GO:0006464; protein modification process; biological_process}	{XM_004511406.2; PREDICTED: Cicer arietinum uncharacterized LOC101488830 (LOC101488830), mRNA}	{PF00595:PDZ domain (Also known as DHR or GLGF) PF00301:Rubredoxin PF13180:PDZ domain PF01155:Hydrogenase/urease nickel incorporation, metallochaperone, hypA}
i0_HQ_c109176/f3p7/766	{AJE72110.1; cytochrome b6 (plastid) [Trifolium pratense]}	{sp|P56773|CYB6_ARATH; Cytochrome b6 OS=Arabidopsis thaliana GN=petB PE=1 SV=1}	{nta:107769160; - - - - -}	{AtCh052; KOG4663 Cytochrome b C Energy production and conversion ;}	{GO:0016021; integral to membrane; cellular_component GO:0022904; respiratory electron transport chain; biological_process GO:0016491; oxidoreductase activity; molecular_function GO:0016020; membrane; cellular_component GO:0009055; NA}	{EU849487.1; Trifolium subterraneum chloroplast, complete genome}	{PF01292:Prokaryotic cytochrome b561 PF00033:Cytochrome b/b6/petB PF13631:Cytochrome b(N-terminal)/b6/petB}
i0_HQ_c109179/f3p0/696	{KRH41653.1; hypothetical protein GLYMA_08G042300 [Glycine max]}	{sp|Q9FY64|RS154_ARATH; 40S ribosomal protein S15-4 OS=Arabidopsis thaliana GN=RPS15D PE=2 SV=1}	{mtr:MTR_8g105110; K02958 RP-S15e, RPS15 small subunit ribosomal protein S15e - ko03010; Genetic Information Processing; Translation; Ribosome}	{At5g09510; KOG0898 40S ribosomal protein S15 J Translation, ribosomal structure and biogenesis ;}	{GO:0005840; ribosome; cellular_component GO:0003735; structural constituent of ribosome; molecular_function GO:0006412; translation; biological_process}	{XM_003630879.2; Medicago truncatula 40S ribosomal protein S15-4 mRNA}	{PF00203:Ribosomal protein S19}
i0_HQ_c109185/f5p0/1002	{XP_003625765.1; transcriptional activator [Medicago truncatula]}	{NA}	{cam:101500193; - - - - -}	{NA}	{GO:0007165; signal transduction; biological_process GO:0030168; platelet activation; biological_process GO:0015078; hydrogen ion transmembrane transporter activity; molecular_function GO:0005604; basement membrane; cellular_component GO:0051258; protein polymerization; biological_process GO:0005102; receptor binding; molecular_function GO:0015991; ATP hydrolysis coupled proton transport; biologi…	{XM_004494092.2; PREDICTED: Cicer arietinum ankyrin repeat domain-containing protein 30A-like (LOC101500193), transcript variant X2, mRNA}	{PF03938:Outer membrane protein (OmpH-like) PF08702:Fibrinogen alpha/beta chain family PF01496:V-type ATPase 116kDa subunit family PF06009:Laminin Domain II PF07851:TMPIT-like protein PF02601:Exonuclease VII, large subunit}
i0_HQ_c109202/f3p24/332	{NA}	{NA}	{NA}	{NA}	{NA}	{XM_013588863.1; Medicago truncatula beta-galactosidase mRNA}	{NA}
i0_HQ_c109212/f5p2/781	{GAU32225.1; hypothetical protein TSUD_278050 [Trifolium subterraneum]}	{sp|Q9C514|RS71_ARATH; 40S ribosomal protein S7-1 OS=Arabidopsis thaliana GN=RPS7A PE=2 SV=1}	{lang:109358866; K02993 RP-S7e, RPS7 small subunit ribosomal protein S7e - ko03010; Genetic Information Processing; Translation; Ribosome; lang:109358866; - - - - -}	{At1g48830; KOG3320 40S ribosomal protein S7 J Translation, ribosomal structure and biogenesis ;}	{GO:0006412; translation; biological_process GO:0003735; structural constituent of ribosome; molecular_function GO:0005622; intracellular; cellular_component GO:0005840; ribosome; cellular_component}	{XM_003618717.2; Medicago truncatula 40S ribosomal S7-like protein mRNA}	{PF01251:Ribosomal protein S7e}
i0_HQ_c109218/f3p0/983	{XP_004498952.1; PREDICTED: uncharacterized protein LOC101496433 [Cicer arietinum]}	{NA}	{lja:Lj0g3v0184509.1; - - - - -}	{NA}	{NA}	{XM_013610504.1; Medicago truncatula transmembrane protein, putative mRNA}	{NA}
i0_HQ_c109221/f4p0/361	{NA}	{NA}	{NA}	{NA}	{NA}	{XM_003597793.2; Medicago truncatula cytochrome C oxidase subunit 5b mRNA}	{NA}
i0_HQ_c109224/f2p0/577	{GAU29912.1; hypothetical protein TSUD_148200 [Trifolium subterraneum]}	{NA}	{adu:107478917; - - - - -}	{NA}	{GO:0005634; nucleus; cellular_component}	{XM_003601136.2; Medicago truncatula phloem specific protein mRNA}	{PF01125:G10 protein}
i0_HQ_c109247/f3p5/603	{XP_010089763.1; 60S ribosomal protein L37a [Morus notabilis]}	{sp|Q9XHE4|RL37A_GOSHI; 60S ribosomal protein L37a OS=Gossypium hirsutum GN=RPL37A PE=3 SV=1}	{mtr:MTR_0199s0040; K02921 RP-L37Ae, RPL37A large subunit ribosomal protein L37Ae - ko03010; Genetic Information Processing; Translation; Ribosome}	{At3g10950; KOG0402 60S ribosomal protein L37 J Translation, ribosomal structure and biogenesis ;}	{GO:0003735; structural constituent of ribosome; molecular_function GO:0005622; intracellular; cellular_component GO:0006412; translation; biological_process GO:0005840; ribosome; cellular_component}	{XM_003608771.2; Medicago truncatula 60S ribosomal protein L37a-2 mRNA}	{PF01780:Ribosomal L37ae protein family}
i0_HQ_c10927/f2p5/612	{GAU35397.1; hypothetical protein TSUD_160480 [Trifolium subterraneum]}	{sp|Q9LZW4|CIPKE_ARATH; CBL-interacting serine/threonine-protein kinase 14 OS=Arabidopsis thaliana GN=CIPK14 PE=1 SV=1}	{cam:101493164; K12761 SNF1 carbon catabolite-derepressing protein kinase 2.7.11.1 ko04138; Cellular Processes; Transport and catabolism; Autophagy - yeast | ko04113; Cellular Processes; Cell growth and death; Meiosis - yeast}	{At5g01820; KOG0583 Serine/threonine protein kinase T Signal transduction mechanisms ;}	{GO:0007165; signal transduction; biological_process}	{BT139158.1; Medicago truncatula clone JCVI-FLMt-21M3 unknown mRNA}	{PF03822:NAF domain}
i0_HQ_c10929/f2p5/872	{GAU42069.1; hypothetical protein TSUD_326470 [Trifolium subterraneum]}	{sp|O23254|GLYC4_ARATH; Serine hydroxymethyltransferase 4 OS=Arabidopsis thaliana GN=SHM4 PE=1 SV=1}	{var:108319054; K00600 glyA, SHMT glycine hydroxymethyltransferase 2.1.2.1 ko01200; Metabolism; Global and overview maps; Carbon metabolism | ko01230; Metabolism; Global and overview maps; Biosynthesis of amino acids | ko00630; Metabolism; Carbohydrate metabolism; Glyoxylate and dicarboxylate metabolism | ko00680; Metabolism; Energy metabolism; Methane metabolism | ko00260; Metabolism; Amino acid…	{At4g13930; KOG2467 Glycine/serine hydroxymethyltransferase E Amino acid transport and metabolism ;}	{GO:0004372; glycine hydroxymethyltransferase activity; molecular_function GO:0006563; L-serine metabolic process; biological_process GO:0006544; glycine metabolic process; biological_process}	{XM_003601635.2; Medicago truncatula serine transhydroxymethyltransferase mRNA}	{PF00464:Serine hydroxymethyltransferase}
i0_HQ_c10933/f2p1/323	{GAU51616.1; hypothetical protein TSUD_182120 [Trifolium subterraneum]}	{sp|Q42553|IDI2_ARATH; Isopentenyl-diphosphate Delta-isomerase II, chloroplastic OS=Arabidopsis thaliana GN=IPP2 PE=1 SV=1}	{lang:109338440; K01823 idi, IDI isopentenyl-diphosphate Delta-isomerase 5.3.3.2 ko00900; Metabolism; Metabolism of terpenoids and polyketides; Terpenoid backbone biosynthesis; lang:109338440; - - - - -}	{At3g02780; KOG0142 Isopentenyl pyrophosphate:dimethylallyl pyrophosphate isomerase Q Secondary metabolites biosynthesis, transport and catabolism ;}	{NA}	{XM_003624130.2; Medicago truncatula isopentenyl-diphosphate delta-isomerase mRNA}	{NA}
i0_HQ_c109353/f3p14/1033	{GAU36711.1; hypothetical protein TSUD_217680 [Trifolium subterraneum]}	{sp|P42653|1433A_VICFA; 14-3-3-like protein A OS=Vicia faba PE=2 SV=1}	{pvu:PHAVU_008G162500g; K06630 YWHAE 14-3-3 protein epsilon - ko04011; Environmental Information Processing; Signal transduction; MAPK signaling pathway - yeast | ko04390; Environmental Information Processing; Signal transduction; Hippo signaling pathway | ko04391; Environmental Information Processing; Signal transduction; Hippo signaling pathway - fly | ko04151; Environmental Information Process…	{At4g09000; KOG0841 Multifunctional chaperone (14-3-3 family) O Posttranslational modification, protein turnover, chaperones ;}	{NA}	{XM_003615112.2; Medicago truncatula general regulatory factor 2 mRNA}	{NA}
i0_HQ_c109368/f2p3/568	{XP_007206183.1; hypothetical protein PRUPE_ppa013857mg [Prunus persica]}	{sp|Q9ZNS6|RCI2B_ARATH; Hydrophobic protein RCI2B OS=Arabidopsis thaliana GN=RCI2B PE=2 SV=1}	{pmum:103344514; - - - - -}	{At3g05890; KOG1773 Stress responsive protein R General function prediction only ;}	{NA}	{BT146712.1; Medicago truncatula clone JCVI-FLMt-7F23 unknown mRNA}	{NA}
i0_HQ_c109401/f4p3/1011	{AAA66288.1; proline-rich protein [Glycine max]}	{NA}	{pvu:PHAVU_009G211300g; - - - - -}	{NA}	{GO:0003677; DNA binding; molecular_function GO:0005199; structural constituent of cell wall; molecular_function GO:0030261; chromosome condensation; biological_process}	{AB043102.1; Trifolium repens mRNA for TrPRP2, complete cds}	{PF02095:Extensin-like protein repeat PF07382:Histone H1-like nucleoprotein HC2}
i0_HQ_c109441/f2p0/445	{XP_013458309.1; 60S ribosomal protein L29-1 [Medicago truncatula]}	{sp|Q9M7X7|RL291_ARATH; 60S ribosomal protein L29-1 OS=Arabidopsis thaliana GN=RPL29A PE=1 SV=1}	{vra:106760230; K02905 RP-L29e, RPL29 large subunit ribosomal protein L29e - ko03010; Genetic Information Processing; Translation; Ribosome}	{At3g06700; KOG3504 60S ribosomal protein L29 J Translation, ribosomal structure and biogenesis ;}	{NA}	{XM_004508104.2; PREDICTED: Cicer arietinum 60S ribosomal protein L29-1-like (LOC101507225), transcript variant X1, mRNA}	{NA}
i0_HQ_c109452/f2p4/437	{GAU38295.1; hypothetical protein TSUD_157800 [Trifolium subterraneum]}	{sp|Q42551|SCE1_ARATH; SUMO-conjugating enzyme SCE1 OS=Arabidopsis thaliana GN=SCE1 PE=1 SV=1}	{aip:107627012; K10577 UBE2I, UBC9 ubiquitin-conjugating enzyme E2 I - ko03013; Genetic Information Processing; Translation; RNA transport | ko04120; Genetic Information Processing; Folding, sorting and degradation; Ubiquitin mediated proteolysis | ko04064; Environmental Information Processing; Signal transduction; NF-kappa B signaling pathway | ko05206; Human Diseases; Cancers: Overview; MicroRN…	{At3g57870; KOG0424 Ubiquitin-protein ligase O Posttranslational modification, protein turnover, chaperones ;}	{NA}	{XM_013601981.1; Medicago truncatula ubiquitin-conjugating enzyme mRNA}	{NA}
i0_HQ_c109467/f2p52/556	{EPS74526.1; hypothetical protein M569_00243, partial [Genlisea aurea]}	{NA}	{NA}	{NA}	{NA}	{KJ476730.1; Trifolium meduseum chloroplast, complete genome}	{NA}
i0_HQ_c109487/f2p0/984	{XP_004498952.1; PREDICTED: uncharacterized protein LOC101496433 [Cicer arietinum]}	{NA}	{lja:Lj0g3v0184509.1; - - - - -}	{NA}	{NA}	{XM_013610504.1; Medicago truncatula transmembrane protein, putative mRNA}	{NA}
i0_HQ_c109490/f3p6/712	{XP_003538244.1; PREDICTED: 40S ribosomal protein S2-4-like [Glycine max]}	{sp|Q9SCM3|RS24_ARATH; 40S ribosomal protein S2-4 OS=Arabidopsis thaliana GN=RPS2D PE=2 SV=1}	{gmx:100809096; K02981 RP-S2e, RPS2 small subunit ribosomal protein S2e - ko03010; Genetic Information Processing; Translation; Ribosome}	{At3g57490; KOG0877 40S ribosomal protein S2/30S ribosomal protein S5 J Translation, ribosomal structure and biogenesis ;}	{GO:0005840; ribosome; cellular_component GO:0006412; translation; biological_process GO:0003723; RNA binding; molecular_function GO:0003735; structural constituent of ribosome; molecular_function}	{XM_013611129.1; Medicago truncatula 40S ribosomal protein S2-4 mRNA}	{PF03719:Ribosomal protein S5, C-terminal domain PF00333:Ribosomal protein S5, N-terminal domain}
i0_HQ_c1095/f7p2/702	{GAU11846.1; hypothetical protein TSUD_75970 [Trifolium subterraneum]}	{NA}	{mtr:MTR_8g099665; K17479 GRXCR1 glutaredoxin domain-containing cysteine-rich protein 1 - -}	{At1g64500; KOG2824 Glutaredoxin-related protein O Posttranslational modification, protein turnover, chaperones ;}	{NA}	{XM_013591774.1; Medicago truncatula glutaredoxin (GRX) family protein mRNA}	{NA}
i0_HQ_c109506/f4p18/720	{KOM48406.1; hypothetical protein LR48_Vigan07g211000 [Vigna angularis]}	{NA}	{mtr:MTR_0052s0060; - - - - -}	{NA}	{NA}	{XM_004516711.2; PREDICTED: Cicer arietinum uncharacterized LOC101496645 (LOC101496645), mRNA}	{NA}
i0_HQ_c109515/f4p5/633	{GAU17584.1; hypothetical protein TSUD_341280 [Trifolium subterraneum]}	{sp|O65731|RS5_CICAR; 40S ribosomal protein S5 (Fragment) OS=Cicer arietinum GN=RPS5 PE=2 SV=1}	{aip:107626205; K02989 RP-S5e, RPS5 small subunit ribosomal protein S5e - ko03010; Genetic Information Processing; Translation; Ribosome}	{At2g37270; KOG3291 Ribosomal protein S7 J Translation, ribosomal structure and biogenesis ;}	{NA}	{XM_013594857.1; Medicago truncatula 40S ribosomal protein S5-2 mRNA}	{NA}
i0_HQ_c109529/f3p0/568	{GAU28029.1; hypothetical protein TSUD_264870 [Trifolium subterraneum]}	{sp|P43399|MT1_TRIRP; Metallothionein-like protein 1 OS=Trifolium repens GN=MT1B PE=3 SV=1}	{adu:107474868; - - - - -}	{At3g09390; KOG4738 Predicted metallothionein P Inorganic ion transport and metabolism ;}	{NA}	{Z26493.1; T.repens TrMT1B mRNA for metallothionein-like protein}	{NA}
i0_HQ_c109553/f2p2/877	{XP_013446770.1; RAB GTPase-like protein A1D [Medicago truncatula]}	{sp|Q40191|RB11A_LOTJA; Ras-related protein Rab11A OS=Lotus japonicus GN=RAB11A PE=2 SV=1}	{mtr:MTR_8g089985; K07904 RAB11A Ras-related protein Rab-11A - ko04144; Cellular Processes; Transport and catabolism; Endocytosis | ko04972; Organismal Systems; Digestive system; Pancreatic secretion | ko04962; Organismal Systems; Excretory system; Vasopressin-regulated water reabsorption | ko04961; Organismal Systems; Excretory system; Endocrine and other factor-regulated calcium reabsorption}	{At5g65270; KOG0087 GTPase Rab11/YPT3, small G protein superfamily U Intracellular trafficking, secretion, and vesicular transport ;}	{GO:0005525; GTP binding; molecular_function GO:0005634; nucleus; cellular_component GO:0003924; GTPase activity; molecular_function GO:0005737; cytoplasm; cellular_component GO:0007264; small GTPase mediated signal transduction; biological_process GO:0005622; intracellular; cellular_component}	{XM_013591316.1; Medicago truncatula RAB GTPase-like protein A1D mRNA}	{PF03193:Protein of unknown function, DUF258 PF00009:Elongation factor Tu GTP binding domain PF00025:ADP-ribosylation factor family PF01926:50S ribosome-binding GTPase PF08477:Ras of Complex, Roc, domain of DAPkinase PF04670:Gtr1/RagA G protein conserved region PF00071:Ras family}
i0_HQ_c109557/f3p33/558	{XP_014500911.1; PREDICTED: uncharacterized protein LOC106761852 isoform X2 [Vigna radiata var. radiata]}	{sp|Q60700|M3K12_MOUSE; Mitogen-activated protein kinase kinase kinase 12 OS=Mus musculus GN=Map3k12 PE=1 SV=1}	{vra:106761852; - - - - -}	{At1g79570_2; KOG0192 Tyrosine kinase specific for activated (GTP-bound) p21cdc42Hs T Signal transduction mechanisms ;}	{NA}	{XM_004488718.1; PREDICTED: Cicer arietinum uncharacterized LOC101510527 (LOC101510527), transcript variant X2, mRNA}	{NA}
i0_HQ_c10958/f4p8/827	{GAU30616.1; hypothetical protein TSUD_62360 [Trifolium subterraneum]}	{sp|P27484|GRP2_NICSY; Glycine-rich protein 2 OS=Nicotiana sylvestris GN=GRP-2 PE=2 SV=1}	{pvu:PHAVU_011G033900g; - - - - -}	{At4g38680; KOG3070 Predicted RNA-binding protein containing PIN domain and invovled in translation or RNA processing J Translation, ribosomal structure and biogenesis ;}	{GO:0006355; regulation of transcription, DNA-dependent; biological_process GO:0003677; DNA binding; molecular_function GO:0003676; nucleic acid binding; molecular_function GO:0008270; zinc ion binding; molecular_function}	{KC218622.1; Vicia faba clone NAC-VF-50 microsatellite sequence}	{PF00098:Zinc knuckle PF00313:'Cold-shock' DNA-binding domain}
i0_HQ_c10959/f3p0/463	{ACJ85519.1; unknown [Medicago truncatula]}	{sp|Q9STH1|HSOP3_ARATH; Hsp70-Hsp90 organizing protein 3 OS=Arabidopsis thaliana GN=HOP3 PE=2 SV=1}	{adu:107487155; K09553 STIP1 stress-induced-phosphoprotein 1 - ko05020; Human Diseases; Neurodegenerative diseases; Prion diseases}	{At4g12400; KOG0548 Molecular co-chaperone STI1 O Posttranslational modification, protein turnover, chaperones ;}	{NA}	{XM_003611212.2; Medicago truncatula stress-inducible protein, putative mRNA}	{NA}
i0_HQ_c109594/f2p5/664	{GAU20717.1; hypothetical protein TSUD_231310 [Trifolium subterraneum]}	{sp|Q94AZ4|CML13_ARATH; Probable calcium-binding protein CML13 OS=Arabidopsis thaliana GN=CML13 PE=2 SV=1}	{pop:POPTR_0003s11450g; K13448 CML calcium-binding protein CML - ko04626; Organismal Systems; Environmental adaptation; Plant-pathogen interaction}	{At1g12310; KOG0027 Calmodulin and related proteins (EF-Hand superfamily) T Signal transduction mechanisms ;}	{GO:0005578; proteinaceous extracellular matrix; cellular_component GO:0005509; calcium ion binding; molecular_function GO:0007165; signal transduction; biological_process}	{XM_004511595.2; PREDICTED: Cicer arietinum probable calcium-binding protein CML13 (LOC101492145), mRNA}	{PF00036:EF hand PF13202:EF hand PF13405:EF-hand domain PF10591:Secreted protein acidic and rich in cysteine Ca binding region PF13499:EF-hand domain pair}
i0_HQ_c109607/f2p0/487	{XP_016176600.1; PREDICTED: 40S ribosomal protein S18 [Arachis ipaensis]}	{sp|P34788|RS18_ARATH; 40S ribosomal protein S18 OS=Arabidopsis thaliana GN=RPS18A PE=1 SV=1}	{cam:101512073; K02964 RP-S18e, RPS18 small subunit ribosomal protein S18e - ko03010; Genetic Information Processing; Translation; Ribosome}	{At1g22780; KOG3311 Ribosomal protein S18 J Translation, ribosomal structure and biogenesis ;}	{GO:0003735; structural constituent of ribosome; molecular_function GO:0005622; intracellular; cellular_component GO:0006412; translation; biological_process GO:0003723; RNA binding; molecular_function GO:0005840; ribosome; cellular_component}	{XM_004496380.1; PREDICTED: Cicer arietinum 40S ribosomal protein S18-like (LOC101512073), mRNA}	{PF00416:Ribosomal protein S13/S18}
i0_HQ_c10976/f2p68/742	{XP_013460951.1; callose synthase-like protein [Medicago truncatula]}	{sp|Q9SJM0|CALSA_ARATH; Callose synthase 10 OS=Arabidopsis thaliana GN=CALS10 PE=2 SV=5}	{lja:Lj0g3v0071679.1; K11000 CALS callose synthase 2.4.1.- -}	{At2g36850; KOG0916 1,3-beta-glucan synthase/callose synthase catalytic subunit M Cell wall/membrane/envelope biogenesis ;}	{NA}	{XM_013605497.1; Medicago truncatula callose synthase-like protein partial mRNA}	{NA}
i0_HQ_c10977/f2p4/307	{XP_013468201.1; vacuolar (H+)-ATPase G subunit [Medicago truncatula]}	{sp|O82702|VATG1_TOBAC; V-type proton ATPase subunit G 1 OS=Nicotiana tabacum GN=VATG1 PE=3 SV=1}	{cam:101502652; K02152 ATPeV1G, ATP6G V-type H+-transporting ATPase subunit G - ko00190; Metabolism; Energy metabolism; Oxidative phosphorylation | ko04150; Environmental Information Processing; Signal transduction; mTOR signaling pathway | ko04145; Cellular Processes; Transport and catabolism; Phagosome | ko04966; Organismal Systems; Excretory system; Collecting duct acid secretion | ko04721; Or…	{At3g01390; KOG1772 Vacuolar H+-ATPase V1 sector, subunit G C Energy production and conversion ;}	{NA}	{XM_013612748.1; Medicago truncatula vacuolar (H+)-ATPase G subunit mRNA}	{NA}
i0_HQ_c1098/f13p1/635	{XP_003616284.1; GASA5-like protein [Medicago truncatula]}	{sp|P47926|RSI1_SOLLC; Protein RSI-1 OS=Solanum lycopersicum GN=RSI-1 PE=2 SV=1}	{cam:101498465; - - - - -}	{NA}	{NA}	{XM_013598756.1; Medicago truncatula GASA/GAST/Snakin mRNA}	{NA}
i0_HQ_c109854/f2p1/968	{NA}	{NA}	{NA}	{NA}	{NA}	{XM_003594176.2; Medicago truncatula hypothetical protein mRNA}	{NA}
i0_HQ_c1099/f6p0/482	{GAU39507.1; hypothetical protein TSUD_68710 [Trifolium subterraneum]}	{sp|O23262|RLF32_ARATH; Protein RALF-like 32 OS=Arabidopsis thaliana GN=RALFL32 PE=3 SV=1}	{mtr:MTR_8g083150; - - - - -}	{NA}	{NA}	{XM_003629568.2; Medicago truncatula RALF mRNA}	{NA}
i0_HQ_c10991/f2p1/650	{GAU14310.1; hypothetical protein TSUD_308700 [Trifolium subterraneum]}	{sp|Q9SXC8|UFC1_ARATH; Ubiquitin-fold modifier-conjugating enzyme 1 OS=Arabidopsis thaliana GN=At1g27530 PE=2 SV=1}	{pvu:PHAVU_009G146200g; K12165 UFC1 ufm1-conjugating enzyme 1 - -}	{At1g27530; KOG3357 Uncharacterized conserved protein S Function unknown ;}	{GO:0005515; protein binding; molecular_function GO:0016881; acid-amino acid ligase activity; molecular_function}	{XM_003603634.2; Medicago truncatula ubiquitin-fold modifier-conjugating enzyme mRNA}	{PF00179:Ubiquitin-conjugating enzyme PF05773:RWD domain}
i0_HQ_c109936/f4p1/724	{KRH41653.1; hypothetical protein GLYMA_08G042300 [Glycine max]}	{sp|Q9FY64|RS154_ARATH; 40S ribosomal protein S15-4 OS=Arabidopsis thaliana GN=RPS15D PE=2 SV=1}	{mtr:MTR_8g105110; K02958 RP-S15e, RPS15 small subunit ribosomal protein S15e - ko03010; Genetic Information Processing; Translation; Ribosome}	{At5g09510; KOG0898 40S ribosomal protein S15 J Translation, ribosomal structure and biogenesis ;}	{GO:0003735; structural constituent of ribosome; molecular_function GO:0006412; translation; biological_process GO:0005840; ribosome; cellular_component}	{XM_003630879.2; Medicago truncatula 40S ribosomal protein S15-4 mRNA}	{PF00203:Ribosomal protein S19}
i0_HQ_c10996/f3p7/463	{GAU33648.1; hypothetical protein TSUD_310560 [Trifolium subterraneum]}	{sp|P93779|RL5_SOLME; 60S ribosomal protein L5 (Fragment) OS=Solanum melongena GN=RPL5 PE=2 SV=1}	{adu:107472977; K02932 RP-L5e, RPL5 large subunit ribosomal protein L5e - ko03010; Genetic Information Processing; Translation; Ribosome}	{At3g25520; KOG0875 60S ribosomal protein L5 J Translation, ribosomal structure and biogenesis ;}	{NA}	{XM_003604008.2; Medicago truncatula 60S ribosomal protein L5-2 mRNA}	{NA}
i0_HQ_c109964/f2p0/683	{NA}	{NA}	{NA}	{NA}	{NA}	{KJ788284.1; Trifolium boissieri chloroplast, complete genome}	{NA}
i0_HQ_c1100/f5p0/757	{GAU12006.1; hypothetical protein TSUD_196300 [Trifolium subterraneum]}	{sp|Q65WT0|BD31B_ORYSJ; Protein BUD31 homolog 2 OS=Oryza sativa subsp. japonica GN=Os05g0446300 PE=2 SV=1}	{mtr:MTR_8g083120; K12873 BUD31, G10 bud site selection protein 31 - ko03040; Genetic Information Processing; Transcription; Spliceosome}	{At4g21110; KOG3404 G10 protein/predicted nuclear transcription regulator K Transcription ;}	{GO:0005634; nucleus; cellular_component}	{XM_013602712.1; Medicago truncatula cell cycle control protein, G10 family protein mRNA}	{PF01125:G10 protein}
i0_HQ_c110009/f2p0/657	{GAU25092.1; hypothetical protein TSUD_257860 [Trifolium subterraneum]}	{sp|Q8W453|DIRL1_ARATH; Putative lipid-transfer protein DIR1 OS=Arabidopsis thaliana GN=DIR1 PE=1 SV=1}	{pvu:PHAVU_008G112900g; - - - - -}	{NA}	{NA}	{Y15371.1; Medicago truncatula mRNA for MtN5 gene}	{NA}
i0_HQ_c110033/f2p55/302	{NA}	{NA}	{NA}	{NA}	{NA}	{XM_013605391.1; Medicago truncatula acetyl-CoA carboxylase mRNA}	{NA}
i0_HQ_c11009/f6p1/913	{XP_003612100.1; ubiquitin-conjugating enzyme E2 [Medicago truncatula]}	{sp|Q9FWT2|UBC16_ARATH; Probable ubiquitin-conjugating enzyme E2 16 OS=Arabidopsis thaliana GN=UBC16 PE=2 SV=1}	{gmx:100785024; K10688 UBE2W, UBC16 ubiquitin-conjugating enzyme E2 W 2.3.2.25 ko04120; Genetic Information Processing; Folding, sorting and degradation; Ubiquitin mediated proteolysis}	{At1g75440; KOG0427 Ubiquitin conjugating enzyme O Posttranslational modification, protein turnover, chaperones ;}	{GO:0016881; acid-amino acid ligase activity; molecular_function GO:0005515; protein binding; molecular_function GO:0015031; protein transport; biological_process GO:0006464; protein modification process; biological_process}	{XM_004512034.2; PREDICTED: Cicer arietinum probable ubiquitin-conjugating enzyme E2 16 (LOC101489578), mRNA}	{PF00179:Ubiquitin-conjugating enzyme PF05773:RWD domain PF05743:UEV domain}
i0_HQ_c110163/f2p0/745	{NA}	{NA}	{NA}	{NA}	{NA}	{KC247802.1; Trifolium repens isolate pSK7-3 KS-dehydrin mRNA, complete cds}	{NA}
i0_HQ_c11025/f4p11/660	{BAE71201.1; putative cytosolic factor [Trifolium pratense]}	{sp|Q56ZI2|PATL2_ARATH; Patellin-2 OS=Arabidopsis thaliana GN=PATL2 PE=1 SV=2}	{cic:CICLE_v10000682mg; - - - - -}	{At1g22530; KOG1471 Phosphatidylinositol transfer protein SEC14 and related proteins I Lipid transport and metabolism ;}	{GO:0045893; positive regulation of transcription, DNA-dependent; biological_process GO:0005634; nucleus; cellular_component GO:0045893; positive regulation of transcription, DNA-dependent; biological_process GO:0005634; nucleus; cellular_component}	{AB236749.1; Trifolium pratense RNA for putative cytosolic factor, complete cds, clone: C143}	{PF04814:Hepatocyte nuclear factor 1 (HNF-1), N terminus PF04814:Hepatocyte nuclear factor 1 (HNF-1), N terminus}
i0_HQ_c11028/f4p1/322	{NA}	{NA}	{NA}	{NA}	{NA}	{XM_004487806.2; PREDICTED: Cicer arietinum calcium-binding protein P (LOC101492127), mRNA}	{NA}
i0_HQ_c1103/f13p3/1004	{ACJ85954.1; unknown [Medicago truncatula]}	{sp|Q6Z4U4|BAK1_ORYSJ; LRR receptor kinase BAK1 OS=Oryza sativa subsp. japonica GN=BAK1 PE=1 SV=1}	{cam:101513865; - - - - -}	{At5g21090; KOG0619 FOG: Leucine rich repeat R General function prediction only ;}	{GO:0005515; protein binding; molecular_function}	{XM_003617043.2; Medicago truncatula somatic embryogenesis receptor kinase-like protein mRNA}	{PF00560:Leucine Rich Repeat}
i0_HQ_c110357/f2p2/879	{GAU26699.1; hypothetical protein TSUD_314760 [Trifolium subterraneum]}	{sp|Q9C595|YLMG2_ARATH; YlmG homolog protein 2, chloroplastic OS=Arabidopsis thaliana GN=YLMG2 PE=2 SV=1}	{pvu:PHAVU_009G082300g; K02221 yggT YggT family protein - -}	{NA}	{GO:0016020; membrane; cellular_component}	{XM_004501373.2; PREDICTED: Cicer arietinum uncharacterized LOC101500659 (LOC101500659), mRNA}	{PF02325:YGGT family}
i0_HQ_c11042/f2p11/412	{AFK47618.1; unknown [Medicago truncatula]}	{NA}	{NA}	{NA}	{NA}	{NA}	{NA}
i0_HQ_c11057/f2p4/541	{NA}	{NA}	{NA}	{NA}	{NA}	{NA}	{NA}
i0_HQ_c1106/f22p2/810	{XP_013443840.1; plastocyanin-like domain protein [Medicago truncatula]}	{sp|Q96316|BCB3_ARATH; Uclacyanin-3 OS=Arabidopsis thaliana GN=UCC3 PE=2 SV=1}	{mtr:MTR_8g007020; - - - - -}	{NA}	{GO:0005507; copper ion binding; molecular_function GO:0009055; NA}	{XM_013588386.1; Medicago truncatula plastocyanin-like domain protein mRNA}	{PF02298:Plastocyanin-like domain}
i0_HQ_c11060/f3p5/729	{XP_004504777.1; PREDICTED: 26S protease regulatory subunit 8 homolog A [Cicer arietinum]}	{sp|Q94BQ2|PRS8B_ARATH; 26S protease regulatory subunit 8 homolog B OS=Arabidopsis thaliana GN=RPT6B PE=1 SV=1}	{pvu:PHAVU_010G164000g; K03066 PSMC5, RPT6 26S proteasome regulatory subunit T6 - ko03050; Genetic Information Processing; Folding, sorting and degradation; Proteasome | ko05169; Human Diseases; Infectious diseases: Viral; Epstein-Barr virus infection}	{At5g19990; KOG0728 26S proteasome regulatory complex, ATPase RPT6 O Posttranslational modification, protein turnover, chaperones ;}	{GO:0005524; ATP binding; molecular_function}	{XM_012717021.1; PREDICTED: Cicer arietinum 26S protease regulatory subunit 8 homolog A (LOC101490950), transcript variant X2, mRNA}	{PF07724:AAA domain (Cdc48 subfamily) PF00004:ATPase family associated with various cellular activities (AAA)}
i0_HQ_c11066/f4p0/690	{NA}	{NA}	{NA}	{NA}	{NA}	{NA}	{NA}
i0_HQ_c11073/f4p46/589	{GAU35423.1; hypothetical protein TSUD_375130 [Trifolium subterraneum]}	{sp|A4ULF8|METK_MEDSF; S-adenosylmethionine synthase OS=Medicago sativa subsp. falcata GN=SAMS PE=2 SV=1}	{nta:107770931; - - - - -}	{At3g17390; KOG1506 S-adenosylmethionine synthetase H Coenzyme transport and metabolism ;}	{GO:0006556; S-adenosylmethionine biosynthetic process; biological_process GO:0004478; methionine adenosyltransferase activity; molecular_function}	{XM_013608259.1; Medicago truncatula S-adenosylmethionine synthase-like protein mRNA}	{PF02773:S-adenosylmethionine synthetase, C-terminal domain}
i0_HQ_c11084/f3p0/981	{XP_013455191.1; Lipid transfer protein, partial [Medicago truncatula]}	{sp|O23758|NLTP_CICAR; Non-specific lipid-transfer protein OS=Cicer arietinum PE=3 SV=1}	{pvu:PHAVU_010G069100g; - - - - -}	{NA}	{NA}	{AC202601.24; Medicago truncatula clone mth2-91e16, complete sequence}	{NA}
i0_HQ_c11086/f3p5/375	{GAU28646.1; hypothetical protein TSUD_159270 [Trifolium subterraneum]}	{NA}	{mtr:MTR_7g078700; - - - - -}	{NA}	{NA}	{AC163384.4; Medicago truncatula chromosome 7 BAC clone mth2-50m11, complete sequence}	{NA}
i0_HQ_c110906/f2p7/729	{XP_016686480.1; PREDICTED: ubiquitin-conjugating enzyme E2 10-like [Gossypium hirsutum]}	{sp|P35132|UBC9_ARATH; SUMO-conjugating enzyme UBC9 OS=Arabidopsis thaliana GN=UBC9 PE=1 SV=1}	{sly:101254567; - - - - -}	{At4g27960; KOG0417 Ubiquitin-protein ligase O Posttranslational modification, protein turnover, chaperones ;}	{GO:0005515; protein binding; molecular_function GO:0015031; protein transport; biological_process GO:0004871; signal transducer activity; molecular_function GO:0006464; protein modification process; biological_process GO:0005834; heterotrimeric G-protein complex; cellular_component GO:0007186; G-protein coupled receptor protein signaling pathway; biological_process GO:0016881; acid-amino acid li…	{XM_004498336.2; PREDICTED: Cicer arietinum ubiquitin-conjugating enzyme E2 10 (LOC101502656), transcript variant X1, mRNA}	{PF00631:GGL domain PF05743:UEV domain PF05773:RWD domain PF00179:Ubiquitin-conjugating enzyme}
i0_HQ_c11092/f3p3/830	{GAU25174.1; hypothetical protein TSUD_150730 [Trifolium subterraneum]}	{NA}	{cam:101511306; - - - - -}	{NA}	{NA}	{XM_013594417.1; Medicago truncatula HR-like lesion-inducing protein mRNA}	{NA}
i0_HQ_c110943/f2p3/690	{XP_003604064.1; mago nashi family, integral exon junction complex protein [Medicago truncatula]}	{sp|P49030|MGN_ORYSJ; Protein mago nashi homolog OS=Oryza sativa subsp. japonica GN=Os12g0287200 PE=2 SV=2}	{var:108346240; K12877 MAGOH protein mago nashi - ko03040; Genetic Information Processing; Transcription; Spliceosome | ko03013; Genetic Information Processing; Translation; RNA transport | ko03015; Genetic Information Processing; Translation; mRNA surveillance pathway}	{At1g02140; KOG3392 Exon-exon junction complex, Magoh component A RNA processing and modification ;}	{GO:0005634; nucleus; cellular_component}	{XM_003604016.2; Medicago truncatula mago nashi family, integral exon junction complex protein partial mRNA}	{PF02792:Mago nashi protein}
i0_HQ_c11096/f4p1/964	{XP_013447237.1; ribosomal protein S6 family protein [Medicago truncatula]}	{sp|Q8VY91|RR6_ARATH; 30S ribosomal protein S6 alpha, chloroplastic OS=Arabidopsis thaliana GN=RPS6 PE=2 SV=1}	{mtr:MTR_8g099720; K02990 RP-S6, MRPS6, rpsF small subunit ribosomal protein S6 - ko03010; Genetic Information Processing; Translation; Ribosome}	{NA}	{GO:0005840; ribosome; cellular_component GO:0019843; rRNA binding; molecular_function GO:0003735; structural constituent of ribosome; molecular_function GO:0006412; translation; biological_process}	{XM_004503537.2; PREDICTED: Cicer arietinum 30S ribosomal protein S6 alpha, chloroplastic (LOC101489849), mRNA}	{PF01250:Ribosomal protein S6}
i0_HQ_c11098/f8p9/1006	{GAU47893.1; hypothetical protein TSUD_25080 [Trifolium subterraneum]}	{sp|Q96291|BAS1A_ARATH; 2-Cys peroxiredoxin BAS1, chloroplastic OS=Arabidopsis thaliana GN=BAS1 PE=1 SV=2}	{cam:101510264; K03386 PRDX2_4, ahpC peroxiredoxin (alkyl hydroperoxide reductase subunit C) 1.11.1.15 ko04214; Cellular Processes; Cell growth and death; Apoptosis - fly}	{At3g11630; KOG0852 Alkyl hydroperoxide reductase, thiol specific antioxidant and related enzymes O Posttranslational modification, protein turnover, chaperones ;}	{GO:0016209; NA GO:0051920; peroxiredoxin activity; molecular_function GO:0055114; oxidation-reduction process; biological_process GO:0016491; oxidoreductase activity; molecular_function}	{XM_003592403.2; Medicago truncatula 1-cys peroxiredoxin PER1 mRNA}	{PF00578:AhpC/TSA family PF08534:Redoxin PF10417:C-terminal domain of 1-Cys peroxiredoxin}
i0_HQ_c110991/f2p2/553	{GAU38198.1; hypothetical protein TSUD_226190 [Trifolium subterraneum]}	{NA}	{gmx:100780185; - - - - -}	{At3g59840; KOG1196 Predicted NAD-dependent oxidoreductase R General function prediction only ;}	{NA}	{NA}	{NA}
i0_HQ_c110999/f2p1/306	{NA}	{NA}	{NA}	{NA}	{NA}	{XM_013596170.1; Medicago truncatula light-harvesting complex I chlorophyll A/B-binding protein mRNA}	{NA}
i0_HQ_c1110/f19p5/741	{AFK46056.1; unknown [Medicago truncatula]}	{sp|P62302|RS13_SOYBN; 40S ribosomal protein S13 OS=Glycine max GN=RPS13 PE=2 SV=1}	{var:108333035; K02953 RP-S13e, RPS13 small subunit ribosomal protein S13e - ko03010; Genetic Information Processing; Translation; Ribosome}	{At4g00100; KOG0400 40S ribosomal protein S13 J Translation, ribosomal structure and biogenesis ;}	{GO:0006412; translation; biological_process GO:0005622; intracellular; cellular_component GO:0003735; structural constituent of ribosome; molecular_function GO:0005840; ribosome; cellular_component}	{BT146262.1; Medicago truncatula clone JCVI-FLMt-1F4 unknown mRNA}	{PF08069:Ribosomal S13/S15 N-terminal domain PF00312:Ribosomal protein S15}
i0_HQ_c11106/f2p2/636	{GAU35918.1; hypothetical protein TSUD_69510 [Trifolium subterraneum]}	{sp|O49347|PSBY_ARATH; Photosystem II core complex proteins psbY, chloroplastic OS=Arabidopsis thaliana GN=PSBY PE=2 SV=1}	{mtr:MTR_8g089610; K02723 psbY photosystem II PsbY protein - ko00195; Metabolism; Energy metabolism; Photosynthesis}	{NA}	{GO:0030145; manganese ion binding; molecular_function GO:0016021; integral to membrane; cellular_component GO:0009523; photosystem II; cellular_component GO:0015979; photosynthesis; biological_process}	{XM_013591252.1; Medicago truncatula photosystem II core complex family psbY protein mRNA}	{PF06298:Photosystem II protein Y (PsbY)}
i0_HQ_c11116/f2p1/346	{NA}	{NA}	{NA}	{NA}	{NA}	{KT971339.1; Medicago truncatula mitochondrion, complete genome}	{NA}
i0_HQ_c11124/f2p3/541	{XP_004509715.1; PREDICTED: auxin-responsive protein IAA9 [Cicer arietinum]}	{sp|Q38826|IAA8_ARATH; Auxin-responsive protein IAA8 OS=Arabidopsis thaliana GN=IAA8 PE=1 SV=1}	{mtr:MTR_8g067530; K14484 IAA auxin-responsive protein IAA - ko04075; Environmental Information Processing; Signal transduction; Plant hormone signal transduction}	{NA}	{NA}	{BT051889.1; Medicago truncatula clone MTYF5_F6_F7_F81G-D-21 unknown mRNA}	{NA}
i0_HQ_c111256/f3p1/976	{NA}	{NA}	{NA}	{NA}	{NA}	{XM_003594176.2; Medicago truncatula hypothetical protein mRNA}	{NA}
i0_HQ_c111404/f2p0/749	{NA}	{NA}	{NA}	{NA}	{NA}	{KJ476730.1; Trifolium meduseum chloroplast, complete genome}	{NA}
i0_HQ_c11157/f2p12/387	{NA}	{NA}	{NA}	{NA}	{NA}	{XM_007154499.1; Phaseolus vulgaris hypothetical protein (PHAVU_003G129100g) mRNA, complete cds}	{NA}
i0_HQ_c111629/f2p0/779	{GAU33847.1; hypothetical protein TSUD_393550 [Trifolium subterraneum]}	{sp|Q06931|ABR17_PEA; ABA-responsive protein ABR17 OS=Pisum sativum PE=2 SV=1}	{vra:106760214; - - - - -}	{NA}	{GO:0009607; response to biotic stimulus; biological_process GO:0006952; defense response; biological_process}	{AY059460.1; Trifolium repens cold responsive protein TRVSP mRNA, complete cds}	{PF00407:Pathogenesis-related protein Bet v I family}
i0_HQ_c11168/f2p1/338	{GAU11383.1; hypothetical protein TSUD_343740 [Trifolium subterraneum]}	{NA}	{vra:106757458; K12456 APC13 anaphase-promoting complex subunit 13 - ko04120; Genetic Information Processing; Folding, sorting and degradation; Ubiquitin mediated proteolysis | ko04110; Cellular Processes; Cell growth and death; Cell cycle | ko04114; Cellular Processes; Cell growth and death; Oocyte meiosis | ko04914; Organismal Systems; Endocrine system; Progesterone-mediated oocyte maturation}	{NA}	{NA}	{XM_003626057.2; Medicago truncatula bonsai protein mRNA}	{NA}
i0_HQ_c11169/f12p0/619	{XP_009777515.1; PREDICTED: uncharacterized protein LOC104227084 [Nicotiana sylvestris]}	{sp|Q6LAF3|H4_FLATR; Histone H4 OS=Flaveria trinervia GN=hh4 PE=3 SV=3}	{crb:CARUB_v10027423mg; K11254 H4 histone H4 - ko05203; Human Diseases; Cancers: Overview; Viral carcinogenesis | ko05322; Human Diseases; Immune diseases; Systemic lupus erythematosus | ko05034; Human Diseases; Substance dependence; Alcoholism}	{At1g07820; KOG3467 Histone H4 B Chromatin structure and dynamics ;}	{GO:0005634; nucleus; cellular_component GO:0006352; transcription initiation, DNA-dependent; biological_process GO:0003677; DNA binding; molecular_function GO:0005622; intracellular; cellular_component GO:0043565; sequence-specific DNA binding; molecular_function}	{XM_013604673.1; Medicago truncatula histone H4 domain protein mRNA}	{PF00125:Core histone H2A/H2B/H3/H4 PF02291:Transcription initiation factor IID, 31kD subunit PF00808:Histone-like transcription factor (CBF/NF-Y) and archaeal histone PF02969:TATA box binding protein associated factor (TAF)}
i0_HQ_c11171/f3p0/808	{XP_013456166.1; adenine nucleotide alpha hydrolase superfamily protein [Medicago truncatula]}	{sp|Q8VYN9|PHO32_ARATH; Universal stress protein PHOS32 OS=Arabidopsis thaliana GN=PHOS32 PE=1 SV=1}	{vra:106754285; - - - - -}	{NA}	{GO:0006950; response to stress; biological_process}	{XM_013600712.1; Medicago truncatula adenine nucleotide alpha hydrolase superfamily protein mRNA}	{PF00582:Universal stress protein family}
i0_HQ_c111713/f4p0/965	{XP_003593177.1; light-harvesting complex I chlorophyll A/B-binding protein [Medicago truncatula]}	{sp|P27524|CB4A_SOLLC; Chlorophyll a-b binding protein CP24 10A, chloroplastic OS=Solanum lycopersicum GN=CAP10A PE=3 SV=1}	{cam:101509645; K08917 LHCB6 light-harvesting complex II chlorophyll a/b binding protein 6 - ko00196; Metabolism; Energy metabolism; Photosynthesis - antenna proteins}	{NA}	{NA}	{XM_003593129.2; Medicago truncatula light-harvesting complex I chlorophyll A/B-binding protein mRNA}	{NA}
i0_HQ_c111772/f2p0/429	{XP_013458309.1; 60S ribosomal protein L29-1 [Medicago truncatula]}	{sp|Q9M7X7|RL291_ARATH; 60S ribosomal protein L29-1 OS=Arabidopsis thaliana GN=RPL29A PE=1 SV=1}	{vra:106760230; K02905 RP-L29e, RPL29 large subunit ribosomal protein L29e - ko03010; Genetic Information Processing; Translation; Ribosome}	{At3g06700; KOG3504 60S ribosomal protein L29 J Translation, ribosomal structure and biogenesis ;}	{NA}	{XM_004508104.2; PREDICTED: Cicer arietinum 60S ribosomal protein L29-1-like (LOC101507225), transcript variant X1, mRNA}	{NA}
i0_HQ_c11179/f9p1/911	{GAU30607.1; hypothetical protein TSUD_62270 [Trifolium subterraneum]}	{sp|Q84TH6|DIR23_ARATH; Dirigent protein 23 OS=Arabidopsis thaliana GN=DIR23 PE=2 SV=1}	{adu:107477114; - - - - -}	{NA}	{NA}	{XM_013601041.1; Medicago truncatula disease resistance-responsive, dirigent domain protein mRNA}	{NA}
i0_HQ_c11185/f5p3/367	{GAU27860.1; hypothetical protein TSUD_114400 [Trifolium subterraneum]}	{NA}	{NA}	{NA}	{NA}	{NA}	{NA}
i0_HQ_c1120/f11p5/919	{XP_004492452.1; PREDICTED: GDSL esterase/lipase CPRD49-like [Cicer arietinum]}	{sp|Q9SRM5|CPR49_ARATH; GDSL esterase/lipase CPRD49 OS=Arabidopsis thaliana GN=CPRD49 PE=2 SV=1}	{cam:101488261; - - - - -}	{At3g11210; KOG3035 Isoamyl acetate-hydrolyzing esterase I Lipid transport and metabolism ;}	{GO:0016788; hydrolase activity, acting on ester bonds; molecular_function GO:0006629; lipid metabolic process; biological_process}	{XM_013593688.1; Medicago truncatula GDSL-like lipase/acylhydrolase mRNA}	{PF00657:GDSL-like Lipase/Acylhydrolase}
i0_HQ_c11200/f3p4/722	{GAU33204.1; hypothetical protein TSUD_206630 [Trifolium subterraneum]}	{NA}	{adu:107457967; K09705 K09705 uncharacterized protein - -}	{NA}	{NA}	{XM_003609944.2; Medicago truncatula cupin family protein mRNA}	{NA}
i0_HQ_c11204/f3p0/380	{AAB41812.1; peroxidase, partial [Medicago sativa]}	{sp|Q96510|PER35_ARATH; Peroxidase 35 OS=Arabidopsis thaliana GN=PER35 PE=1 SV=1}	{gmx:100815654; K00430 E1.11.1.7 peroxidase 1.11.1.7 ko00940; Metabolism; Biosynthesis of other secondary metabolites; Phenylpropanoid biosynthesis}	{NA}	{NA}	{L36158.1; Medicago sativa peroxidase (pxdD) mRNA, 3' end}	{NA}
i0_HQ_c11207/f2p1/326	{NA}	{NA}	{NA}	{NA}	{NA}	{XM_004508122.2; PREDICTED: Cicer arietinum pathogenesis-related protein STH-2-like (LOC101512575), mRNA}	{NA}
i0_HQ_c11211/f6p5/411	{XP_003626784.2; UDP-glucosyltransferase family protein [Medicago truncatula]}	{sp|Q9AR73|HQGT_RAUSE; Hydroquinone glucosyltransferase OS=Rauvolfia serpentina GN=AS PE=1 SV=1}	{mtr:MTR_8g009050; K08237 E2.4.1.218 hydroquinone glucosyltransferase 2.4.1.218 -}	{At4g01070; KOG1192 UDP-glucuronosyl and UDP-glucosyl transferase GC Carbohydrate transport and metabolism ; Energy production and conversion ;}	{NA}	{XM_003626731.2; Medicago truncatula UDP-glucosyltransferase family protein mRNA}	{NA}
i0_HQ_c11212/f5p7/566	{AFK49302.1; unknown [Medicago truncatula]}	{sp|P15792|KPK1_PHAVU; Protein kinase PVPK-1 OS=Phaseolus vulgaris PE=2 SV=1}	{lang:109358434; - - - - -; lang:109358434; - - - - -}	{At5g55910; KOG0610 Putative serine/threonine protein kinase R General function prediction only ;}	{GO:0004672; protein kinase activity; molecular_function GO:0006468; protein phosphorylation; biological_process GO:0005524; ATP binding; molecular_function}	{XM_013592660.1; Medicago truncatula Serine/Threonine kinase family protein mRNA}	{PF07714:Protein tyrosine kinase PF00069:Protein kinase domain}
i0_HQ_c112129/f5p9/614	{NA}	{NA}	{NA}	{NA}	{NA}	{NA}	{NA}
i0_HQ_c11214/f2p2/406	{NA}	{NA}	{NA}	{NA}	{NA}	{AP014962.1; Oryza sativa Japonica Group DNA, chromosome 6, cultivar: Nipponbare, complete sequence}	{NA}
i0_HQ_c11221/f2p9/579	{GAU24883.1; hypothetical protein TSUD_116070 [Trifolium subterraneum]}	{NA}	{NA}	{NA}	{NA}	{XM_003610639.2; Medicago truncatula ARM repeat protein interacting WITH ABF2 protein mRNA}	{NA}
i0_HQ_c112272/f2p0/966	{AAA66288.1; proline-rich protein [Glycine max]}	{NA}	{pvu:PHAVU_009G211300g; - - - - -}	{NA}	{GO:0003677; DNA binding; molecular_function GO:0030261; chromosome condensation; biological_process GO:0005199; structural constituent of cell wall; molecular_function}	{AB043102.1; Trifolium repens mRNA for TrPRP2, complete cds}	{PF07382:Histone H1-like nucleoprotein HC2 PF02095:Extensin-like protein repeat}
i0_HQ_c112277/f2p0/972	{AAR10886.1; chlorophyll a/b binding protein [Trifolium pratense]}	{sp|P07371|CB22_PEA; Chlorophyll a-b binding protein AB80, chloroplastic OS=Pisum sativum GN=AB80 PE=1 SV=1}	{csv:101211276; K08912 LHCB1 light-harvesting complex II chlorophyll a/b binding protein 1 - ko00196; Metabolism; Energy metabolism; Photosynthesis - antenna proteins}	{NA}	{NA}	{AY430082.1; Trifolium pratense chlorophyll a/b binding protein mRNA, complete cds; nuclear gene for chloroplast product}	{NA}
i0_HQ_c11230/f2p7/528	{XP_003627041.2; Paf1 complex component [Medicago truncatula]}	{NA}	{mtr:MTR_8g014460; K15174 PAF1 RNA polymerase II-associated factor 1 - ko04011; Environmental Information Processing; Signal transduction; MAPK signaling pathway - yeast}	{NA}	{NA}	{XM_012718642.1; PREDICTED: Cicer arietinum protein PAF1 homolog (LOC101488479), mRNA}	{NA}
i0_HQ_c112347/f3p1/969	{NA}	{NA}	{NA}	{NA}	{NA}	{XM_003594176.2; Medicago truncatula hypothetical protein mRNA}	{NA}
i0_HQ_c11236/f2p1/870	{GAU12438.1; hypothetical protein TSUD_229720 [Trifolium subterraneum]}	{NA}	{vvi:100248314; - - - - -}	{NA}	{NA}	{XM_003610894.2; Medicago truncatula Rieske (2Fe-2S) domain protein mRNA}	{NA}
i0_HQ_c112388/f2p1/877	{GAU17621.1; hypothetical protein TSUD_254960, partial [Trifolium subterraneum]}	{sp|Q6GP53|NAA50_XENLA; N-alpha-acetyltransferase 50 OS=Xenopus laevis GN=naa50 PE=2 SV=1}	{cam:101508621; K20793 NAA50, NAT5 N-alpha-acetyltransferase 50 2.3.1.258 -}	{At5g11340; KOG3138 Predicted N-acetyltransferase R General function prediction only ;}	{GO:0016747; transferase activity, transferring acyl groups other than amino-acyl groups; molecular_function GO:0008080; N-acetyltransferase activity; molecular_function}	{XM_004491615.2; PREDICTED: Cicer arietinum N-alpha-acetyltransferase 50 (LOC101508621), transcript variant X1, mRNA}	{PF13673:Acetyltransferase (GNAT) domain PF08445:FR47-like protein PF00583:Acetyltransferase (GNAT) family PF13302:Acetyltransferase (GNAT) domain PF13508:Acetyltransferase (GNAT) domain}
i0_HQ_c112389/f2p1/537	{GAU41855.1; hypothetical protein TSUD_366020 [Trifolium subterraneum]}	{sp|Q9LHI0|NDUA6_ARATH; NADH dehydrogenase [ubiquinone] 1 alpha subcomplex subunit 6 OS=Arabidopsis thaliana GN=At3g12260 PE=2 SV=1}	{mtr:MTR_8g040150; K03950 NDUFA6 NADH dehydrogenase (ubiquinone) 1 alpha subcomplex subunit 6 - ko00190; Metabolism; Energy metabolism; Oxidative phosphorylation | ko05010; Human Diseases; Neurodegenerative diseases; Alzheimer's disease | ko05012; Human Diseases; Neurodegenerative diseases; Parkinson's disease | ko05016; Human Diseases; Neurodegenerative diseases; Huntington's disease | ko04932; …	{At3g12260; KOG3426 NADH:ubiquinone oxidoreductase, NDUFA6/B14 subunit C Energy production and conversion ;}	{NA}	{XM_003627881.2; Medicago truncatula NADH dehydrogenase [ubiquinone] 1 alpha subcomplex subunit 6 mRNA}	{NA}
i0_HQ_c11240/f5p1/658	{GAU50498.1; hypothetical protein TSUD_242410, partial [Trifolium subterraneum]}	{sp|Q8BHA0|IN80C_MOUSE; INO80 complex subunit C OS=Mus musculus GN=Ino80c PE=1 SV=1}	{lja:Lj0g3v0072839.1; K11667 INO80C, IES6 INO80 complex subunit C - -}	{SPAC222.04c; KOG4137 Uncharacterized conserved protein S Function unknown ;}	{NA}	{XM_004504282.2; PREDICTED: Cicer arietinum chromatin-remodeling complex subunit ies6 (LOC101511359), mRNA}	{NA}
i0_HQ_c11242/f3p4/765	{GAU19019.1; hypothetical protein TSUD_193570 [Trifolium subterraneum]}	{sp|Q9FN48|CAS_ARATH; Calcium sensing receptor, chloroplastic OS=Arabidopsis thaliana GN=CAS PE=1 SV=1}	{lang:109344856; - - - - -; lang:109344856; - - - - -}	{NA}	{NA}	{XM_003609103.2; Medicago truncatula extracellular calcium sensing receptor partial mRNA}	{NA}
i0_HQ_c11244/f2p0/930	{XP_003629443.2; ADP-ribosylation factor-like protein A1D [Medicago truncatula]}	{sp|Q9ZPX1|ARF5_ARATH; ADP-ribosylation factor-like protein 2 OS=Arabidopsis thaliana GN=ARL2 PE=2 SV=1}	{mtr:MTR_8g077540; K07943 ARL2 ADP-ribosylation factor-like protein 2 - -}	{At2g18390; KOG0073 GTP-binding ADP-ribosylation factor-like protein ARL2 UZ Intracellular trafficking, secretion, and vesicular transport ; Cytoskeleton ;}	{GO:0005737; cytoplasm; cellular_component GO:0005524; ATP binding; molecular_function GO:0005634; nucleus; cellular_component GO:0019001; guanyl nucleotide binding; molecular_function GO:0003924; GTPase activity; molecular_function GO:0016021; integral to membrane; cellular_component GO:0003873; 6-phosphofructo-2-kinase activity; molecular_function GO:0005622; intracellular; cellular_component G…	{XM_013590955.1; Medicago truncatula ADP-ribosylation factor-like protein A1D mRNA}	{PF08477:Ras of Complex, Roc, domain of DAPkinase PF04670:Gtr1/RagA G protein conserved region PF02421:Ferrous iron transport protein B PF00071:Ras family PF00009:Elongation factor Tu GTP binding domain PF01591:6-phosphofructo-2-kinase PF00503:G-protein alpha subunit PF01926:50S ribosome-binding GTPase PF00025:ADP-ribosylation factor family}
i0_HQ_c112534/f2p7/943	{AAR10886.1; chlorophyll a/b binding protein [Trifolium pratense]}	{sp|P07371|CB22_PEA; Chlorophyll a-b binding protein AB80, chloroplastic OS=Pisum sativum GN=AB80 PE=1 SV=1}	{csv:101211276; K08912 LHCB1 light-harvesting complex II chlorophyll a/b binding protein 1 - ko00196; Metabolism; Energy metabolism; Photosynthesis - antenna proteins}	{NA}	{GO:0046872; metal ion binding; molecular_function GO:0003824; NA}	{AY430082.1; Trifolium pratense chlorophyll a/b binding protein mRNA, complete cds; nuclear gene for chloroplast product}	{PF10143:2,3-bisphosphoglycerate-independent phosphoglycerate mutase}
i0_HQ_c11258/f2p0/989	{XP_013443021.1; embryo-specific protein [Medicago truncatula]}	{sp|Q6NPM5|ATS3B_ARATH; Embryo-specific protein ATS3B OS=Arabidopsis thaliana GN=ATS3B PE=1 SV=1}	{mtr:MTR_0050s0240; - - - - -}	{NA}	{GO:0005515; protein binding; molecular_function}	{BT140728.1; Medicago truncatula clone JCVI-FLMt-7H2 unknown mRNA}	{PF01477:PLAT/LH2 domain}
i0_HQ_c11260/f2p0/979	{NA}	{NA}	{NA}	{NA}	{NA}	{NA}	{NA}
i0_HQ_c112761/f2p0/577	{AAQ24852.1; 10 kDa photosystem II polypeptide [Trifolium pratense]}	{sp|Q40519|PSBR_TOBAC; Photosystem II 10 kDa polypeptide, chloroplastic OS=Nicotiana tabacum GN=PSBR PE=2 SV=1}	{cam:101505387; K03541 psbR photosystem II 10kDa protein - ko00195; Metabolism; Energy metabolism; Photosynthesis}	{NA}	{GO:0009654; oxygen evolving complex; cellular_component GO:0009523; photosystem II; cellular_component GO:0015979; photosynthesis; biological_process GO:0042651; thylakoid membrane; cellular_component}	{AY348557.1; Trifolium pratense 10 kDa photosystem II polypeptide mRNA, complete cds}	{PF04725:Photosystem II 10 kDa polypeptide PsbR}
i0_HQ_c11279/f4p55/573	{ANB59159.1; putative elongation factor 1-alpha, partial [Medicago ruthenica]}	{sp|O64937|EF1A_ORYSJ; Elongation factor 1-alpha OS=Oryza sativa subsp. japonica GN=REFA1 PE=2 SV=2}	{cam:101515489; K03231 EEF1A elongation factor 1-alpha - ko03013; Genetic Information Processing; Translation; RNA transport | ko05134; Human Diseases; Infectious diseases: Bacterial; Legionellosis}	{At1g07930; KOG0052 Translation elongation factor EF-1 alpha/Tu J Translation, ribosomal structure and biogenesis ;}	{NA}	{XM_013595882.1; Medicago truncatula GTP-binding elongation factor Tu family protein mRNA}	{NA}
i0_HQ_c112791/f2p2/1000	{AAR10886.1; chlorophyll a/b binding protein [Trifolium pratense]}	{sp|P27490|CB28_PEA; Chlorophyll a-b binding protein 8, chloroplastic OS=Pisum sativum GN=CAB8 PE=1 SV=1}	{cmo:103487605; K08912 LHCB1 light-harvesting complex II chlorophyll a/b binding protein 1 - ko00196; Metabolism; Energy metabolism; Photosynthesis - antenna proteins}	{NA}	{GO:0003824; NA GO:0046872; metal ion binding; molecular_function}	{AY430082.1; Trifolium pratense chlorophyll a/b binding protein mRNA, complete cds; nuclear gene for chloroplast product}	{PF10143:2,3-bisphosphoglycerate-independent phosphoglycerate mutase}
i0_HQ_c11284/f3p1/537	{GAU44317.1; hypothetical protein TSUD_304980 [Trifolium subterraneum]}	{sp|Q945K7|IDH5_ARATH; Isocitrate dehydrogenase [NAD] catalytic subunit 5, mitochondrial OS=Arabidopsis thaliana GN=IDH5 PE=1 SV=1}	{lang:109337979; K00030 IDH3 isocitrate dehydrogenase (NAD+) 1.1.1.41 ko01200; Metabolism; Global and overview maps; Carbon metabolism | ko01210; Metabolism; Global and overview maps; 2-Oxocarboxylic acid metabolism | ko01230; Metabolism; Global and overview maps; Biosynthesis of amino acids | ko00020; Metabolism; Carbohydrate metabolism; Citrate cycle (TCA cycle); lang:109337979; - - - - -}	{At5g03290; KOG0785 Isocitrate dehydrogenase, alpha subunit E Amino acid transport and metabolism ;}	{NA}	{XM_004501527.2; PREDICTED: Cicer arietinum isocitrate dehydrogenase [NAD] catalytic subunit 5, mitochondrial (LOC101493754), mRNA}	{NA}
i0_HQ_c11285/f2p1/558	{GAU15033.1; hypothetical protein TSUD_48290 [Trifolium subterraneum]}	{NA}	{cam:101502007; - - - - -}	{NA}	{NA}	{XM_004496865.2; PREDICTED: Cicer arietinum uncharacterized LOC101502007 (LOC101502007), transcript variant X8, mRNA}	{NA}
i0_HQ_c112939/f2p4/548	{GAU11829.1; hypothetical protein TSUD_75790 [Trifolium subterraneum]}	{sp|Q03683|BIP3_TOBAC; Luminal-binding protein 3 (Fragment) OS=Nicotiana tabacum GN=BIP3 PE=2 SV=1}	{mtr:MTR_8g099795; K09490 HSPA5, BIP heat shock 70kDa protein 5 - ko03060; Genetic Information Processing; Folding, sorting and degradation; Protein export | ko04141; Genetic Information Processing; Folding, sorting and degradation; Protein processing in endoplasmic reticulum | ko04918; Organismal Systems; Endocrine system; Thyroid hormone synthesis | ko05020; Human Diseases; Neurodegenerative di…	{At5g42020; KOG0100 Molecular chaperones GRP78/BiP/KAR2, HSP70 superfamily O Posttranslational modification, protein turnover, chaperones ;}	{GO:0004402; histone acetyltransferase activity; molecular_function GO:0016568; chromatin modification; biological_process}	{XM_013591801.1; Medicago truncatula heat shock cognate 70 kDa-like protein mRNA}	{PF10394:Histone acetyl transferase HAT1 N-terminus}
i0_HQ_c11296/f2p4/700	{GAU21711.1; hypothetical protein TSUD_242820 [Trifolium subterraneum]}	{sp|P23586|STP1_ARATH; Sugar transport protein 1 OS=Arabidopsis thaliana GN=STP1 PE=1 SV=2}	{mtr:MTR_0009s0370; - - - - -}	{At1g11260; KOG0254 Predicted transporter (major facilitator superfamily) R General function prediction only ;}	{GO:0016021; integral to membrane; cellular_component GO:0022857; transmembrane transporter activity; molecular_function GO:0055085; transmembrane transport; biological_process}	{XM_013588059.1; Medicago truncatula sugar porter (SP) family MFS transporter mRNA}	{PF00083:Sugar (and other) transporter}
i0_HQ_c1130/f10p1/554	{XP_003524765.3; PREDICTED: uncharacterized protein LOC100819493 [Glycine max]}	{NA}	{var:108341477; - - - - -}	{NA}	{NA}	{XM_004508671.2; PREDICTED: Cicer arietinum uncharacterized LOC101503663 (LOC101503663), mRNA}	{NA}
i0_HQ_c113007/f7p3/871	{GAU27459.1; hypothetical protein TSUD_161450 [Trifolium subterraneum]}	{sp|O49595|HMGB1_ARATH; High mobility group B protein 1 OS=Arabidopsis thaliana GN=HMGB1 PE=1 SV=1}	{cam:101509802; K10802 HMGB1 high mobility group protein B1 - ko03410; Genetic Information Processing; Replication and repair; Base excision repair | ko04140; Cellular Processes; Transport and catabolism; Autophagy - animal}	{At3g51880; KOG0381 HMG box-containing protein R General function prediction only ;}	{NA}	{XM_003623245.2; Medicago truncatula high mobility group (HMG)-box protein mRNA}	{NA}
i0_HQ_c11309/f2p1/673	{XP_003613903.1; NAD(P)H dehydrogenase [Medicago truncatula]}	{sp|Q9FG89|PNSB5_ARATH; Photosynthetic NDH subunit of subcomplex B 5, chloroplastic OS=Arabidopsis thaliana GN=PNSB5 PE=2 SV=1}	{cam:101505997; - - - - -}	{NA}	{NA}	{BT141711.1; Medicago truncatula clone JCVI-FLMt-9C5 unknown mRNA}	{NA}
i0_HQ_c113115/f3p9/767	{XP_016443822.1; PREDICTED: cytochrome b6 [Nicotiana tabacum]}	{sp|P56773|CYB6_ARATH; Cytochrome b6 OS=Arabidopsis thaliana GN=petB PE=1 SV=1}	{nta:107769160; - - - - -}	{AtCh052; KOG4663 Cytochrome b C Energy production and conversion ;}	{GO:0016020; membrane; cellular_component GO:0009055; NA GO:0016021; integral to membrane; cellular_component GO:0022904; respiratory electron transport chain; biological_process GO:0016491; oxidoreductase activity; molecular_function}	{EU849487.1; Trifolium subterraneum chloroplast, complete genome}	{PF13631:Cytochrome b(N-terminal)/b6/petB PF00033:Cytochrome b/b6/petB PF01292:Prokaryotic cytochrome b561}
i0_HQ_c11312/f2p2/586	{GAU22130.1; hypothetical protein TSUD_310340 [Trifolium subterraneum]}	{sp|O49886|CYPH_LUPLU; Peptidyl-prolyl cis-trans isomerase OS=Lupinus luteus PE=2 SV=1}	{gmx:100787030; K01802 E5.2.1.8 peptidylprolyl isomerase 5.2.1.8 -}	{At2g16600; KOG0865 Cyclophilin type peptidyl-prolyl cis-trans isomerase O Posttranslational modification, protein turnover, chaperones ;}	{GO:0006457; protein folding; biological_process GO:0003755; peptidyl-prolyl cis-trans isomerase activity; molecular_function}	{XM_004500685.1; PREDICTED: Cicer arietinum peptidyl-prolyl cis-trans isomerase (LOC101500116), mRNA}	{PF00160:Cyclophilin type peptidyl-prolyl cis-trans isomerase/CLD}
i0_HQ_c11336/f2p1/468	{AFK41833.1; unknown [Medicago truncatula]}	{NA}	{NA}	{NA}	{NA}	{XM_013605707.1; Medicago truncatula choline-phosphate cytidylyltransferase mRNA}	{NA}
i0_HQ_c113421/f2p0/629	{GAU30834.1; hypothetical protein TSUD_267540 [Trifolium subterraneum]}	{sp|O23758|NLTP_CICAR; Non-specific lipid-transfer protein OS=Cicer arietinum PE=3 SV=1}	{pvu:PHAVU_010G066400g; - - - - -}	{NA}	{NA}	{BT051321.1; Medicago truncatula clone MTYF1_F2_F3_F41G-H-6 unknown mRNA}	{NA}
i0_HQ_c11345/f2p0/873	{GAU44894.1; hypothetical protein TSUD_137260 [Trifolium subterraneum]}	{sp|Q8VYR7|BOR1_ARATH; Boron transporter 1 OS=Arabidopsis thaliana GN=BOR1 PE=1 SV=1}	{var:108318747; - - - - -}	{At3g62270; KOG1172 Na+-independent Cl/HCO3 exchanger AE1 and related transporters (SLC4 family) P Inorganic ion transport and metabolism ;}	{GO:0006820; anion transport; biological_process GO:0016021; integral to membrane; cellular_component}	{XM_003601205.2; Medicago truncatula boron transporter-like protein mRNA}	{PF00955:HCO3- transporter family}
i0_HQ_c11351/f2p1/818	{XP_003591657.1; ethylene response factor [Medicago truncatula]}	{sp|Q9LY05|EF106_ARATH; Ethylene-responsive transcription factor ERF106 OS=Arabidopsis thaliana GN=ERF106 PE=2 SV=1}	{cam:101512509; - - - - -}	{NA}	{GO:0006355; regulation of transcription, DNA-dependent; biological_process GO:0003700; sequence-specific DNA binding transcription factor activity; molecular_function}	{BT137953.1; Medicago truncatula clone JCVI-FLMt-11K9 unknown mRNA}	{PF00847:AP2 domain}
i0_HQ_c11352/f3p1/772	{GAU31195.1; hypothetical protein TSUD_210520 [Trifolium subterraneum]}	{sp|Q9FWT2|UBC16_ARATH; Probable ubiquitin-conjugating enzyme E2 16 OS=Arabidopsis thaliana GN=UBC16 PE=2 SV=1}	{mtr:MTR_8g076490; K10688 UBE2W, UBC16 ubiquitin-conjugating enzyme E2 W 2.3.2.25 ko04120; Genetic Information Processing; Folding, sorting and degradation; Ubiquitin mediated proteolysis}	{At1g75440; KOG0427 Ubiquitin conjugating enzyme O Posttranslational modification, protein turnover, chaperones ;}	{GO:0005515; protein binding; molecular_function GO:0016881; acid-amino acid ligase activity; molecular_function}	{XM_003629328.2; Medicago truncatula ubiquitin-conjugating enzyme mRNA}	{PF00179:Ubiquitin-conjugating enzyme PF05773:RWD domain}
i0_HQ_c11353/f2p35/791	{GAU12673.1; hypothetical protein TSUD_121650 [Trifolium subterraneum]}	{sp|P25083|ADT1_SOLTU; ADP,ATP carrier protein, mitochondrial OS=Solanum tuberosum GN=ANT PE=2 SV=1}	{jcu:105628692; K05863 SLC25A4S, ANT solute carrier family 25 (mitochondrial adenine nucleotide translocator), member 4/5/6/31 - ko04020; Environmental Information Processing; Signal transduction; Calcium signaling pathway | ko04022; Environmental Information Processing; Signal transduction; cGMP-PKG signaling pathway | ko05012; Human Diseases; Neurodegenerative diseases; Parkinson's disease | ko…	{At3g08580; KOG0749 Mitochondrial ADP/ATP carrier proteins C Energy production and conversion ;}	{NA}	{XM_013603712.1; Medicago truncatula ADP/ATP carrier protein mRNA}	{NA}
i0_HQ_c11356/f3p0/554	{XP_013463319.1; glycosyltransferase family 92 protein [Medicago truncatula]}	{sp|Q9LTZ9|GALS2_ARATH; Galactan beta-1,4-galactosyltransferase GALS2 OS=Arabidopsis thaliana GN=GALS2 PE=2 SV=1}	{cam:101489232; - - - - -}	{At5g44670; KOG4735 Extracellular protein with conserved cysteines S Function unknown ;}	{NA}	{XM_013607865.1; Medicago truncatula glycosyltransferase family 92 protein mRNA}	{NA}
i0_HQ_c11365/f2p2/638	{XP_013457493.1; casein kinase II subunit alpha-like protein [Medicago truncatula]}	{sp|O64816|CSK2P_ARATH; Casein kinase II subunit alpha-4, chloroplastic OS=Arabidopsis thaliana GN=CKA4 PE=2 SV=1}	{lang:109341285; K03097 CSNK2A casein kinase II subunit alpha 2.7.11.1 ko03008; Genetic Information Processing; Translation; Ribosome biogenesis in eukaryotes | ko04310; Environmental Information Processing; Signal transduction; Wnt signaling pathway | ko04064; Environmental Information Processing; Signal transduction; NF-kappa B signaling pathway | ko04139; Cellular Processes; Transport and cata…	{At2g23070; KOG0668 Casein kinase II, alpha subunit TDK Signal transduction mechanisms ; Cell cycle control, cell division, chromosome partitioning ; Transcription ;}	{GO:0004672; protein kinase activity; molecular_function GO:0005524; ATP binding; molecular_function GO:0006468; protein phosphorylation; biological_process}	{XM_013602039.1; Medicago truncatula casein kinase II subunit alpha-like protein mRNA}	{PF00069:Protein kinase domain}
i0_HQ_c113686/f2p6/640	{GAU12941.1; hypothetical protein TSUD_97520 [Trifolium subterraneum]}	{sp|Q9FF52|RL123_ARATH; 60S ribosomal protein L12-3 OS=Arabidopsis thaliana GN=RPL12C PE=2 SV=1}	{adu:107476958; K02870 RP-L12e, RPL12 large subunit ribosomal protein L12e - ko03010; Genetic Information Processing; Translation; Ribosome}	{At5g60670; KOG0886 40S ribosomal protein S2 J Translation, ribosomal structure and biogenesis ;}	{GO:0005840; ribosome; cellular_component GO:0003735; structural constituent of ribosome; molecular_function GO:0006412; translation; biological_process}	{XM_004505937.2; PREDICTED: Cicer arietinum 60S ribosomal protein L12-3-like (LOC101513949), mRNA}	{PF00298:Ribosomal protein L11, RNA binding domain}
i0_HQ_c11372/f2p1/944	{NA}	{sp|P43316|GUN5_HUMIN; Endoglucanase-5 OS=Humicola insolens PE=1 SV=1}	{NA}	{NA}	{GO:0008810; cellulase activity; molecular_function GO:0005975; carbohydrate metabolic process; biological_process}	{NA}	{PF02015:Glycosyl hydrolase family 45}
i0_HQ_c11373/f2p1/372	{NA}	{NA}	{NA}	{NA}	{NA}	{XM_013610487.1; Medicago truncatula transmembrane protein, putative mRNA}	{NA}
i0_HQ_c11392/f2p1/954	{AAR10886.1; chlorophyll a/b binding protein [Trifolium pratense]}	{sp|P07371|CB22_PEA; Chlorophyll a-b binding protein AB80, chloroplastic OS=Pisum sativum GN=AB80 PE=1 SV=1}	{csv:101211276; K08912 LHCB1 light-harvesting complex II chlorophyll a/b binding protein 1 - ko00196; Metabolism; Energy metabolism; Photosynthesis - antenna proteins}	{NA}	{GO:0003824; NA GO:0046872; metal ion binding; molecular_function}	{AY430082.1; Trifolium pratense chlorophyll a/b binding protein mRNA, complete cds; nuclear gene for chloroplast product}	{PF10143:2,3-bisphosphoglycerate-independent phosphoglycerate mutase}
i0_HQ_c113928/f2p1/780	{GAU37476.1; hypothetical protein TSUD_207120 [Trifolium subterraneum]}	{sp|Q06930|ABR18_PEA; ABA-responsive protein ABR18 OS=Pisum sativum PE=2 SV=1}	{cam:101499736; - - - - -}	{NA}	{GO:0009607; response to biotic stimulus; biological_process GO:0006952; defense response; biological_process}	{XM_013602837.1; Medicago truncatula pathogenesis-related protein bet V I family protein mRNA}	{PF00407:Pathogenesis-related protein Bet v I family}
i0_HQ_c114/f54p2/460	{NA}	{NA}	{NA}	{NA}	{NA}	{CT485797.2; Medicago truncatula chromosome 5 clone mth4-11a3, COMPLETE SEQUENCE}	{NA}
i0_HQ_c1140/f17p2/614	{GAU43713.1; hypothetical protein TSUD_179960 [Trifolium subterraneum]}	{sp|Q9SUS5|RHA1B_ARATH; E3 ubiquitin-protein ligase RHA1B OS=Arabidopsis thaliana GN=RHA1B PE=2 SV=1}	{cam:101515406; K16281 RHA1 RING-H2 zinc finger protein RHA1 - -}	{At3g61460; KOG0800 FOG: Predicted E3 ubiquitin ligase O Posttranslational modification, protein turnover, chaperones ;}	{GO:0005680; anaphase-promoting complex; cellular_component GO:0008270; zinc ion binding; molecular_function GO:0046872; metal ion binding; molecular_function GO:0004842; ubiquitin-protein ligase activity; molecular_function GO:0005515; protein binding; molecular_function}	{NA}	{PF00628:PHD-finger PF13639:Ring finger domain PF12906:RING-variant domain PF12861:Anaphase-promoting complex subunit 11 RING-H2 finger PF14634:zinc-RING finger domain PF12678:RING-H2 zinc finger domain PF00097:Zinc finger, C3HC4 type (RING finger)}
i0_HQ_c11400/f2p0/568	{XP_004503702.1; PREDICTED: short-chain dehydrogenase TIC 32, chloroplastic-like [Cicer arietinum]}	{NA}	{mtr:MTR_8g098415; K19329 WWOX WW domain-containing oxidoreductase - -}	{NA}	{NA}	{XM_004503645.2; PREDICTED: Cicer arietinum short-chain dehydrogenase TIC 32, chloroplastic-like (LOC101496007), mRNA}	{NA}
i0_HQ_c11403/f7p5/904	{XP_003600625.1; small GTPase family RAB protein [Medicago truncatula]}	{sp|P31583|RHN1_NICPL; Ras-related protein RHN1 OS=Nicotiana plumbaginifolia GN=RHN1 PE=2 SV=1}	{cam:101512595; K07889 RAB5C Ras-related protein Rab-5C - ko04014; Environmental Information Processing; Signal transduction; Ras signaling pathway | ko04144; Cellular Processes; Transport and catabolism; Endocytosis | ko04145; Cellular Processes; Transport and catabolism; Phagosome | ko04962; Organismal Systems; Excretory system; Vasopressin-regulated water reabsorption | ko05152; Human Diseases…	{At5g45130; KOG0092 GTPase Rab5/YPT51 and related small G protein superfamily GTPases U Intracellular trafficking, secretion, and vesicular transport ;}	{GO:0016887; ATPase activity; molecular_function GO:0003924; GTPase activity; molecular_function GO:0070526; threonylcarbamoyladenosine biosynthetic process; biological_process GO:0005525; GTP binding; molecular_function GO:0005622; intracellular; cellular_component GO:0007264; small GTPase mediated signal transduction; biological_process GO:0005737; cytoplasm; cellular_component GO:0005524; ATP …	{XM_003600577.2; Medicago truncatula small GTPase family RAB protein mRNA}	{PF02367:Threonylcarbamoyl adenosine biosynthesis protein TsaE PF03193:Protein of unknown function, DUF258 PF01926:50S ribosome-binding GTPase PF00025:ADP-ribosylation factor family PF08477:Ras of Complex, Roc, domain of DAPkinase PF04670:Gtr1/RagA G protein conserved region PF00005:ABC transporter PF00071:Ras family}
i0_HQ_c1141/f7p0/568	{XP_004505603.1; PREDICTED: NADH dehydrogenase [ubiquinone] iron-sulfur protein 6, mitochondrial [Cicer arietinum]}	{sp|Q9M9M6|NDUS6_ARATH; NADH dehydrogenase [ubiquinone] iron-sulfur protein 6, mitochondrial OS=Arabidopsis thaliana GN=At3g03070 PE=3 SV=1}	{pvu:PHAVU_011G020300g; K03939 NDUFS6 NADH dehydrogenase (ubiquinone) Fe-S protein 6 - ko00190; Metabolism; Energy metabolism; Oxidative phosphorylation | ko05010; Human Diseases; Neurodegenerative diseases; Alzheimer's disease | ko05012; Human Diseases; Neurodegenerative diseases; Parkinson's disease | ko05016; Human Diseases; Neurodegenerative diseases; Huntington's disease | ko04932; Human Dis…	{At3g03070; KOG3456 NADH:ubiquinone oxidoreductase, NDUFS6/13 kDa subunit C Energy production and conversion ;}	{NA}	{XM_013601177.1; Medicago truncatula NADH ubiquinone oxidoreductase 13 kDa-like subunit mRNA}	{NA}
i0_HQ_c11410/f2p5/651	{GAU23945.1; hypothetical protein TSUD_181340 [Trifolium subterraneum]}	{sp|Q9T0G2|CYC2_ARATH; Cytochrome c-2 OS=Arabidopsis thaliana GN=CYTC-2 PE=1 SV=1}	{thj:104815853; K08738 CYC cytochrome c - ko00920; Metabolism; Energy metabolism; Sulfur metabolism | ko02020; Environmental Information Processing; Signal transduction; Two-component system | ko04210; Cellular Processes; Cell growth and death; Apoptosis | ko04214; Cellular Processes; Cell growth and death; Apoptosis - fly | ko04215; Cellular Processes; Cell growth and death; Apoptosis - multiple…	{At4g10040; KOG3453 Cytochrome c C Energy production and conversion ;}	{GO:0005506; iron ion binding; molecular_function GO:0009055; NA GO:0020037; heme binding; molecular_function}	{XM_003610868.2; Medicago truncatula cytochrome protein C mRNA}	{PF00034:Cytochrome c PF13442:Cytochrome C oxidase, cbb3-type, subunit III }
i0_HQ_c11417/f2p10/586	{GAU50596.1; hypothetical protein TSUD_186680 [Trifolium subterraneum]}	{sp|P28644|ROC1_SPIOL; 28 kDa ribonucleoprotein, chloroplastic OS=Spinacia oleracea PE=1 SV=1}	{adu:107488384; K11294 NCL, NSR1 nucleolin - ko05130; Human Diseases; Infectious diseases: Bacterial; Pathogenic Escherichia coli infection}	{At4g24770; KOG0118 FOG: RRM domain R General function prediction only ;}	{GO:0003676; nucleic acid binding; molecular_function}	{XM_013602261.1; Medicago truncatula 31 kDa ribonucleoprotein mRNA}	{PF00076:RNA recognition motif. (a.k.a. RRM, RBD, or RNP domain)}
i0_HQ_c11418/f5p0/662	{XP_003613544.1; thioredoxin-like protein [Medicago truncatula]}	{sp|Q6Z4I3|TRH21_ORYSJ; Thioredoxin H2-1 OS=Oryza sativa subsp. japonica GN=Os07g0190800 PE=2 SV=1}	{cam:101490867; K03671 trxA thioredoxin 1 - ko04621; Organismal Systems; Immune system; NOD-like receptor signaling pathway | ko05418; Human Diseases; Cardiovascular diseases; Fluid shear stress and atherosclerosis}	{At5g39950; KOG0907 Thioredoxin O Posttranslational modification, protein turnover, chaperones ;}	{GO:0045454; cell redox homeostasis; biological_process GO:0016209; NA GO:0016491; oxidoreductase activity; molecular_function GO:0055114; oxidation-reduction process; biological_process}	{XM_003613496.2; Medicago truncatula thioredoxin-like protein mRNA}	{PF00578:AhpC/TSA family PF00085:Thioredoxin PF08534:Redoxin}
i0_HQ_c114188/f2p1/574	{AAQ24852.1; 10 kDa photosystem II polypeptide [Trifolium pratense]}	{sp|Q40519|PSBR_TOBAC; Photosystem II 10 kDa polypeptide, chloroplastic OS=Nicotiana tabacum GN=PSBR PE=2 SV=1}	{cam:101505387; K03541 psbR photosystem II 10kDa protein - ko00195; Metabolism; Energy metabolism; Photosynthesis}	{NA}	{GO:0042651; thylakoid membrane; cellular_component GO:0015979; photosynthesis; biological_process GO:0009523; photosystem II; cellular_component GO:0009654; oxygen evolving complex; cellular_component}	{AY348557.1; Trifolium pratense 10 kDa photosystem II polypeptide mRNA, complete cds}	{PF04725:Photosystem II 10 kDa polypeptide PsbR}
i0_HQ_c11420/f4p2/464	{CDP13175.1; unnamed protein product [Coffea canephora]}	{sp|P51823|ARF2_ORYSJ; ADP-ribosylation factor 2 OS=Oryza sativa subsp. japonica GN=ARF PE=2 SV=2}	{brp:103846468; K07937 ARF1 ADP-ribosylation factor 1 - ko04072; Environmental Information Processing; Signal transduction; Phospholipase D signaling pathway | ko04144; Cellular Processes; Transport and catabolism; Endocytosis | ko05110; Human Diseases; Infectious diseases: Bacterial; Vibrio cholerae infection | ko05134; Human Diseases; Infectious diseases: Bacterial; Legionellosis}	{At3g62290; KOG0070 GTP-binding ADP-ribosylation factor Arf1 U Intracellular trafficking, secretion, and vesicular transport ;}	{NA}	{XM_012712764.1; PREDICTED: Cicer arietinum ADP-ribosylation factor 2 (LOC105851577), mRNA}	{NA}
i0_HQ_c11421/f5p3/976	{GAU41253.1; hypothetical protein TSUD_97880 [Trifolium subterraneum]}	{sp|P11894|RK9_PEA; 50S ribosomal protein L9, chloroplastic OS=Pisum sativum GN=RPL9 PE=2 SV=2}	{pvu:PHAVU_011G086500g; K02939 RP-L9, MRPL9, rplI large subunit ribosomal protein L9 - ko03010; Genetic Information Processing; Translation; Ribosome}	{At3g44890; KOG4607 Mitochondrial ribosomal protein L9 J Translation, ribosomal structure and biogenesis ;}	{NA}	{X14019.1; Pea mRNA for plastid ribosomal protein CL9}	{NA}
i0_HQ_c114234/f2p4/753	{GAU39565.1; hypothetical protein TSUD_38180 [Trifolium subterraneum]}	{sp|Q8L4N1|PHO34_ARATH; Universal stress protein PHOS34 OS=Arabidopsis thaliana GN=PHOS34 PE=1 SV=1}	{cam:101494457; - - - - -}	{NA}	{GO:0006950; response to stress; biological_process}	{XM_003591493.2; Medicago truncatula universal stress family protein mRNA}	{PF00582:Universal stress protein family}
i0_HQ_c11427/f2p4/831	{AFK44936.1; unknown [Medicago truncatula]}	{sp|O22315|SR34_ARATH; Serine/arginine-rich-splicing factor SR34 OS=Arabidopsis thaliana GN=SR34 PE=1 SV=1}	{mtr:MTR_8g058530; K12890 SFRS1, ASF, SF2 splicing factor, arginine/serine-rich 1 - ko03040; Genetic Information Processing; Transcription; Spliceosome | ko04657; Organismal Systems; Immune system; IL-17 signaling pathway | ko05168; Human Diseases; Infectious diseases: Viral; Herpes simplex infection}	{At1g02840; KOG0105 Alternative splicing factor ASF/SF2 (RRM superfamily) A RNA processing and modification ;}	{GO:0006270; DNA-dependent DNA replication initiation; biological_process GO:0003676; nucleic acid binding; molecular_function GO:0003924; GTPase activity; molecular_function GO:0005047; signal recognition particle binding; molecular_function GO:0005525; GTP binding; molecular_function GO:0006184; GTP catabolic process; biological_process GO:0006886; intracellular protein transport; biological_pr…	{XM_012714176.1; PREDICTED: Cicer arietinum serine/arginine-rich-splicing factor SR34 (LOC101491540), transcript variant X4, mRNA}	{PF00076:RNA recognition motif. (a.k.a. RRM, RBD, or RNP domain) PF02724:CDC45-like protein PF04086:Signal recognition particle, alpha subunit, N-terminal}
i0_HQ_c1143/f11p2/744	{XP_013468843.1; hypothetical protein MTR_1g077550 [Medicago truncatula]}	{sp|Q9FZ89|Y1815_ARATH; UPF0426 protein At1g28150, chloroplastic OS=Arabidopsis thaliana GN=At1g28150 PE=2 SV=1}	{cam:101514012; - - - - -}	{NA}	{NA}	{NM_001248472.1; Glycine max uncharacterized LOC100500510 (LOC100500510), mRNA}	{NA}
i0_HQ_c11431/f3p6/989	{GAU34925.1; hypothetical protein TSUD_312560 [Trifolium subterraneum]}	{sp|Q94AP3|WAT1_ARATH; Protein WALLS ARE THIN 1 OS=Arabidopsis thaliana GN=WAT1 PE=1 SV=1}	{gmx:100798686; - - - - -}	{NA}	{GO:0016020; membrane; cellular_component}	{XM_013606732.1; Medicago truncatula auxin-induced 5NG4-like protein mRNA}	{PF00892:EamA-like transporter family}
i0_HQ_c11433/f2p17/579	{XP_004487887.1; PREDICTED: isoflavone 3'-hydroxylase-like [Cicer arietinum]}	{sp|Q6WNQ9|C81E9_MEDTR; Isoflavone 3'-hydroxylase (Fragment) OS=Medicago truncatula GN=CYP81E9 PE=1 SV=1}	{cam:101503563; - - - - -}	{At4g37370; KOG0156 Cytochrome P450 CYP2 subfamily Q Secondary metabolites biosynthesis, transport and catabolism ;}	{GO:0055114; oxidation-reduction process; biological_process GO:0005506; iron ion binding; molecular_function GO:0020037; heme binding; molecular_function GO:0016705; oxidoreductase activity, acting on paired donors, with incorporation or reduction of molecular oxygen; molecular_function}	{XM_013607879.1; Medicago truncatula cytochrome P450 family 81 protein mRNA}	{PF00067:Cytochrome P450}
i0_HQ_c11434/f8p3/876	{XP_003610307.1; YbaB/EbfC DNA-binding family protein [Medicago truncatula]}	{sp|Q9M098|EBFC1_ARATH; Nucleoid-associated protein At4g30620, chloroplastic OS=Arabidopsis thaliana GN=At4g30620 PE=1 SV=1}	{lang:109355054; - - - - -; lang:109355054; - - - - -}	{NA}	{GO:0006281; DNA repair; biological_process GO:0051382; kinetochore assembly; biological_process}	{XM_003610259.2; Medicago truncatula YbaB/EbfC DNA-binding family protein mRNA}	{PF09415:CENP-S associating Centromere protein X}
i0_HQ_c114367/f2p0/586	{AAQ24852.1; 10 kDa photosystem II polypeptide [Trifolium pratense]}	{sp|Q40519|PSBR_TOBAC; Photosystem II 10 kDa polypeptide, chloroplastic OS=Nicotiana tabacum GN=PSBR PE=2 SV=1}	{cam:101505387; K03541 psbR photosystem II 10kDa protein - ko00195; Metabolism; Energy metabolism; Photosynthesis}	{NA}	{GO:0009654; oxygen evolving complex; cellular_component GO:0009523; photosystem II; cellular_component GO:0042651; thylakoid membrane; cellular_component GO:0015979; photosynthesis; biological_process}	{AY348557.1; Trifolium pratense 10 kDa photosystem II polypeptide mRNA, complete cds}	{PF04725:Photosystem II 10 kDa polypeptide PsbR}
i0_HQ_c11440/f2p2/456	{XP_010691851.1; PREDICTED: gibberellin-regulated protein 1 isoform X1 [Beta vulgaris subsp. vulgaris]}	{sp|F4IQJ4|GASAB_ARATH; Gibberellin-regulated protein 11 OS=Arabidopsis thaliana GN=GASA11 PE=3 SV=1}	{lang:109357753; - - - - -; lang:109357753; - - - - -}	{NA}	{NA}	{XM_003527602.3; PREDICTED: Glycine max gibberellin-regulated protein 1-like (LOC100790448), mRNA}	{NA}
i0_HQ_c114412/f2p1/765	{GAU37476.1; hypothetical protein TSUD_207120 [Trifolium subterraneum]}	{sp|Q06930|ABR18_PEA; ABA-responsive protein ABR18 OS=Pisum sativum PE=2 SV=1}	{cam:101499736; - - - - -}	{NA}	{GO:0009607; response to biotic stimulus; biological_process GO:0006952; defense response; biological_process}	{XM_013602837.1; Medicago truncatula pathogenesis-related protein bet V I family protein mRNA}	{PF00407:Pathogenesis-related protein Bet v I family}
i0_HQ_c114432/f2p0/423	{XP_013462731.1; RING zinc finger protein, putative [Medicago truncatula]}	{NA}	{cam:101498772; - - - - -}	{At3g06140; KOG4265 Predicted E3 ubiquitin ligase O Posttranslational modification, protein turnover, chaperones ;}	{NA}	{XM_013607277.1; Medicago truncatula RING zinc finger protein, putative mRNA}	{NA}
i0_HQ_c11446/f2p0/968	{GAU21552.1; hypothetical protein TSUD_35150 [Trifolium subterraneum]}	{sp|Q8LEK2|TVP23_ARATH; Golgi apparatus membrane protein-like protein ECHIDNA OS=Arabidopsis thaliana GN=ECH PE=1 SV=1}	{cam:101503178; - - - - -}	{At1g09330; KOG3195 Uncharacterized membrane protein NPD008/CGI-148 R General function prediction only ;}	{GO:0016021; integral to membrane; cellular_component}	{XM_004495578.2; PREDICTED: Cicer arietinum Golgi apparatus membrane protein-like protein ECHIDNA (LOC101503178), mRNA}	{PF05832:Eukaryotic protein of unknown function (DUF846)}
i0_HQ_c114483/f6p0/932	{GAU41986.1; hypothetical protein TSUD_306920 [Trifolium subterraneum]}	{NA}	{vra:106761310; - - - - -}	{NA}	{NA}	{XM_003603406.2; Medicago truncatula hypothetical protein mRNA}	{NA}
i0_HQ_c11449/f3p1/801	{GAU43348.1; hypothetical protein TSUD_283030 [Trifolium subterraneum]}	{NA}	{cam:101492477; - - - - -}	{NA}	{GO:0016020; membrane; cellular_component GO:0006886; intracellular protein transport; biological_process GO:0006605; protein targeting; biological_process}	{XM_013595409.1; Medicago truncatula SecE/sec61-gamma subunit of protein translocation complex protein mRNA}	{PF00584:SecE/Sec61-gamma subunits of protein translocation complex}
i0_HQ_c1145/f6p1/818	{XP_015942550.1; PREDICTED: 40S ribosomal protein S18 [Arachis duranensis]}	{sp|P34788|RS18_ARATH; 40S ribosomal protein S18 OS=Arabidopsis thaliana GN=RPS18A PE=1 SV=1}	{cam:101504654; K02964 RP-S18e, RPS18 small subunit ribosomal protein S18e - ko03010; Genetic Information Processing; Translation; Ribosome}	{At4g09800; KOG3311 Ribosomal protein S18 J Translation, ribosomal structure and biogenesis ;}	{GO:0005840; ribosome; cellular_component GO:0006412; translation; biological_process GO:0003723; RNA binding; molecular_function GO:0003735; structural constituent of ribosome; molecular_function GO:0005622; intracellular; cellular_component}	{XM_013596567.1; Medicago truncatula ribosomal protein S13P/S18e mRNA}	{PF00416:Ribosomal protein S13/S18}
i0_HQ_c1146/f7p2/502	{XP_004506777.1; PREDICTED: 30S ribosomal protein S31, chloroplastic [Cicer arietinum]}	{sp|O80439|RR31_ARATH; 30S ribosomal protein S31, chloroplastic OS=Arabidopsis thaliana GN=RPS31 PE=1 SV=1}	{vra:106778636; K19033 PSRP4 RPS31 - -}	{NA}	{NA}	{XM_003604602.2; Medicago truncatula hypothetical protein mRNA}	{NA}
i0_HQ_c1147/f8p4/569	{ADK47412.1; cold tolerant protein [Cicer microphyllum]}	{NA}	{cam:101509121; - - - - -}	{NA}	{NA}	{XM_004487276.2; PREDICTED: Cicer arietinum uncharacterized LOC101508801 (LOC101508801), mRNA}	{NA}
i0_HQ_c11471/f2p0/966	{AAR10886.1; chlorophyll a/b binding protein [Trifolium pratense]}	{sp|P07371|CB22_PEA; Chlorophyll a-b binding protein AB80, chloroplastic OS=Pisum sativum GN=AB80 PE=1 SV=1}	{csv:101211276; K08912 LHCB1 light-harvesting complex II chlorophyll a/b binding protein 1 - ko00196; Metabolism; Energy metabolism; Photosynthesis - antenna proteins}	{NA}	{NA}	{AY430082.1; Trifolium pratense chlorophyll a/b binding protein mRNA, complete cds; nuclear gene for chloroplast product}	{NA}
i0_HQ_c114839/f2p2/306	{GAU40660.1; hypothetical protein TSUD_83390 [Trifolium subterraneum]}	{NA}	{atr:18433451; K06875 PDCD5, TFAR19 programmed cell death protein 5 - -}	{At1g29850; KOG3431 Apoptosis-related protein/predicted DNA-binding protein D Cell cycle control, cell division, chromosome partitioning ;}	{NA}	{XM_013601873.1; Medicago truncatula double-stranded DNA-binding-like protein mRNA}	{NA}
i0_HQ_c11492/f2p5/748	{XP_013450266.1; white-brown-complex ABC transporter family protein [Medicago truncatula]}	{sp|Q93YS4|AB22G_ARATH; ABC transporter G family member 22 OS=Arabidopsis thaliana GN=ABCG22 PE=1 SV=1}	{cam:101511748; - - - - -}	{At3g52310; KOG0061 Transporter, ABC superfamily (Breast cancer resistance protein) Q Secondary metabolites biosynthesis, transport and catabolism ;}	{GO:0016020; membrane; cellular_component}	{XM_013594813.1; Medicago truncatula white-brown-complex ABC transporter family protein mRNA}	{PF01061:ABC-2 type transporter}
i0_HQ_c11493/f4p1/810	{AFK42852.1; unknown [Lotus japonicus]}	{sp|Q9FWT2|UBC16_ARATH; Probable ubiquitin-conjugating enzyme E2 16 OS=Arabidopsis thaliana GN=UBC16 PE=2 SV=1}	{gmx:100785024; K10688 UBE2W, UBC16 ubiquitin-conjugating enzyme E2 W 2.3.2.25 ko04120; Genetic Information Processing; Folding, sorting and degradation; Ubiquitin mediated proteolysis}	{At1g75440; KOG0427 Ubiquitin conjugating enzyme O Posttranslational modification, protein turnover, chaperones ;}	{GO:0016881; acid-amino acid ligase activity; molecular_function GO:0015031; protein transport; biological_process GO:0006464; protein modification process; biological_process GO:0005515; protein binding; molecular_function}	{XM_004512034.2; PREDICTED: Cicer arietinum probable ubiquitin-conjugating enzyme E2 16 (LOC101489578), mRNA}	{PF05773:RWD domain PF05743:UEV domain PF00179:Ubiquitin-conjugating enzyme}
i0_HQ_c1150/f6p1/583	{XP_013465326.1; hypothetical protein MTR_2g095040 [Medicago truncatula]}	{NA}	{NA}	{NA}	{NA}	{NA}	{NA}
i0_HQ_c115010/f2p0/729	{NA}	{NA}	{NA}	{NA}	{NA}	{KC247802.1; Trifolium repens isolate pSK7-3 KS-dehydrin mRNA, complete cds}	{NA}
i0_HQ_c115062/f2p5/975	{NA}	{NA}	{NA}	{NA}	{NA}	{XM_003594176.2; Medicago truncatula hypothetical protein mRNA}	{NA}
i0_HQ_c11508/f4p4/599	{GAU46434.1; hypothetical protein TSUD_91520, partial [Trifolium subterraneum]}	{sp|P93472|DIM_PEA; Delta(24)-sterol reductase OS=Pisum sativum GN=DIM PE=1 SV=1}	{adu:107477170; K09828 DHCR24, DWF1 Delta24-sterol reductase [EC:1.3.1.72 1.3.1.-] 1.3.1.72,1.3.1.- ko00100; Metabolism; Lipid metabolism; Steroid biosynthesis}	{At3g19820; KOG1262 FAD-binding protein DIMINUTO R General function prediction only ;}	{NA}	{XM_013601081.1; Medicago truncatula delta(24)-sterol reductase-like protein mRNA}	{NA}
i0_HQ_c11512/f3p0/983	{XP_004498991.1; PREDICTED: LIM domain-containing protein WLIM1-like [Cicer arietinum]}	{sp|Q94JX5|WLIM1_ARATH; LIM domain-containing protein WLIM1 OS=Arabidopsis thaliana GN=WLIM1 PE=1 SV=1}	{lang:109337341; K09377 CSRP cysteine and glycine-rich protein - -; lang:109337341; - - - - -}	{At1g10200; KOG1700 Regulatory protein MLP and related LIM proteins TZ Signal transduction mechanisms ; Cytoskeleton ;}	{GO:0051536; iron-sulfur cluster binding; molecular_function GO:0008270; zinc ion binding; molecular_function}	{XM_003589010.2; Medicago truncatula GATA type zinc finger transcription factor family protein mRNA}	{PF13187:4Fe-4S dicluster domain PF00412:LIM domain}
i0_HQ_c11515/f2p5/449	{AAK13242.1; polyphenol oxidase [Trifolium pratense]}	{sp|P43309|PPO_MALDO; Polyphenol oxidase, chloroplastic OS=Malus domestica PE=2 SV=1}	{gmx:100802763; K00422 E1.10.3.1 polyphenol oxidase 1.10.3.1 ko00350; Metabolism; Amino acid metabolism; Tyrosine metabolism | ko00950; Metabolism; Biosynthesis of other secondary metabolites; Isoquinoline alkaloid biosynthesis}	{NA}	{GO:0055114; oxidation-reduction process; biological_process GO:0004097; catechol oxidase activity; molecular_function GO:0003824; NA}	{AY017302.1; Trifolium pratense polyphenol oxidase (PPO1) mRNA, complete cds}	{PF12143:Protein of unknown function (DUF_B2219) PF01564:Spermine/spermidine synthase}
i0_HQ_c1152/f7p1/396	{NA}	{NA}	{NA}	{NA}	{NA}	{NA}	{NA}
i0_HQ_c115209/f2p45/734	{GAU17240.1; hypothetical protein TSUD_324440 [Trifolium subterraneum]}	{sp|P12858|G3PA_PEA; Glyceraldehyde-3-phosphate dehydrogenase A, chloroplastic OS=Pisum sativum GN=GAPA PE=2 SV=2}	{cam:101493610; K05298 GAPA glyceraldehyde-3-phosphate dehydrogenase (NADP+) (phosphorylating) 1.2.1.13 ko01200; Metabolism; Global and overview maps; Carbon metabolism | ko00710; Metabolism; Energy metabolism; Carbon fixation in photosynthetic organisms}	{At1g12900; KOG0657 Glyceraldehyde 3-phosphate dehydrogenase G Carbohydrate transport and metabolism ;}	{GO:0016620; oxidoreductase activity, acting on the aldehyde or oxo group of donors, NAD or NADP as acceptor; molecular_function GO:0055114; oxidation-reduction process; biological_process}	{XM_003624505.1; Medicago truncatula glyceraldehyde-3-phosphate dehydrogenase mRNA}	{PF02800:Glyceraldehyde 3-phosphate dehydrogenase, C-terminal domain}
i0_HQ_c11525/f2p15/673	{GAU23688.1; hypothetical protein TSUD_304630 [Trifolium subterraneum]}	{sp|O04496|AED3_ARATH; Aspartyl protease AED3 OS=Arabidopsis thaliana GN=AED3 PE=1 SV=1}	{pvu:PHAVU_009G144100g; - - - - -}	{At3g54400; KOG1339 Aspartyl protease O Posttranslational modification, protein turnover, chaperones ;}	{GO:0004190; aspartic-type endopeptidase activity; molecular_function GO:0006508; proteolysis; biological_process}	{AB236756.1; Trifolium pratense RNA for hypothetical protein, complete cds, clone: C1525}	{PF00026:Eukaryotic aspartyl protease}
i0_HQ_c115269/f2p2/634	{GAU11402.1; hypothetical protein TSUD_343930 [Trifolium subterraneum]}	{sp|Q0DKW8|LTI6B_ORYSJ; Hydrophobic protein LTI6B OS=Oryza sativa subsp. japonica GN=LTI6B PE=2 SV=1}	{cam:101498830; - - - - -}	{At3g05890; KOG1773 Stress responsive protein R General function prediction only ;}	{NA}	{XM_004494449.2; PREDICTED: Cicer arietinum hydrophobic protein LTI6B-like (LOC101498830), mRNA}	{NA}
i0_HQ_c115320/f4p1/967	{AAR10886.1; chlorophyll a/b binding protein [Trifolium pratense]}	{sp|P07371|CB22_PEA; Chlorophyll a-b binding protein AB80, chloroplastic OS=Pisum sativum GN=AB80 PE=1 SV=1}	{csv:101211276; K08912 LHCB1 light-harvesting complex II chlorophyll a/b binding protein 1 - ko00196; Metabolism; Energy metabolism; Photosynthesis - antenna proteins}	{NA}	{GO:0003824; NA GO:0046872; metal ion binding; molecular_function}	{AY430082.1; Trifolium pratense chlorophyll a/b binding protein mRNA, complete cds; nuclear gene for chloroplast product}	{PF10143:2,3-bisphosphoglycerate-independent phosphoglycerate mutase}
i0_HQ_c11543/f3p9/367	{NA}	{NA}	{NA}	{NA}	{NA}	{XM_003604539.2; Medicago truncatula GTP-binding elongation factor Tu family protein mRNA}	{NA}
i0_HQ_c1155/f14p1/478	{OMP05225.1; Proteinase inhibitor I13, potato inhibitor I [Corchorus capsularis]}	{sp|P24076|BGIA_MOMCH; Glu S.griseus protease inhibitor OS=Momordica charantia PE=1 SV=1}	{mdm:103453406; - - - - -}	{NA}	{NA}	{XM_003590753.2; Medicago truncatula inhibitor of trypsin and hageman factor-like protein mRNA}	{NA}
i0_HQ_c11559/f3p128/952	{XP_003605744.1; caffeic acid O-methyltransferase [Medicago truncatula]}	{sp|Q6WUC2|7OMT_PAPSO; (R,S)-reticuline 7-O-methyltransferase OS=Papaver somniferum GN=7OMT PE=1 SV=1}	{mtr:MTR_0017s0100; - - - - -}	{At5g54160; KOG3178 Hydroxyindole-O-methyltransferase and related SAM-dependent methyltransferases R General function prediction only ;}	{GO:0046983; protein dimerization activity; molecular_function GO:0008171; O-methyltransferase activity; molecular_function GO:0046983; protein dimerization activity; molecular_function GO:0008171; O-methyltransferase activity; molecular_function}	{XM_003605696.2; Medicago truncatula caffeic acid O-methyltransferase mRNA}	{PF00891:O-methyltransferase PF08100:Dimerisation domain PF00891:O-methyltransferase PF08100:Dimerisation domain}
i0_HQ_c11567/f2p0/324	{XP_004508269.1; PREDICTED: uncharacterized protein LOC101493459 [Cicer arietinum]}	{NA}	{lang:109342022; - - - - -; lang:109342022; - - - - -}	{NA}	{NA}	{XM_013611850.1; Medicago truncatula SLL1 protein mRNA}	{NA}
i0_HQ_c11572/f4p34/457	{NA}	{NA}	{NA}	{NA}	{NA}	{EU849487.1; Trifolium subterraneum chloroplast, complete genome}	{NA}
i0_HQ_c11574/f2p10/493	{NA}	{NA}	{NA}	{NA}	{NA}	{XM_003617628.2; Medicago truncatula glycerophosphoryl diester phosphodiesterase family protein mRNA}	{NA}
i0_HQ_c11575/f4p0/419	{XP_003598552.1; transmembrane protein, putative [Medicago truncatula]}	{NA}	{NA}	{NA}	{NA}	{NA}	{NA}
i0_HQ_c1158/f20p0/652	{XP_003593950.2; ribosomal protein S11 [Medicago truncatula]}	{sp|O22584|RS14_LUPLU; 40S ribosomal protein S14 OS=Lupinus luteus GN=RPS14 PE=2 SV=1}	{cam:101489775; K02955 RP-S14e, RPS14 small subunit ribosomal protein S14e - ko03010; Genetic Information Processing; Translation; Ribosome}	{At3g11510; KOG0407 40S ribosomal protein S14 J Translation, ribosomal structure and biogenesis ;}	{GO:0003735; structural constituent of ribosome; molecular_function GO:0006412; translation; biological_process GO:2001070; NA GO:0005840; ribosome; cellular_component}	{XM_003593902.2; Medicago truncatula ribosomal protein S11 mRNA}	{PF03423:Carbohydrate binding domain (family 25) PF00411:Ribosomal protein S11}
i0_HQ_c11581/f2p1/586	{GAU41315.1; hypothetical protein TSUD_93950 [Trifolium subterraneum]}	{sp|Q9FH37|ILR3_ARATH; Transcription factor ILR3 OS=Arabidopsis thaliana GN=ILR3 PE=1 SV=1}	{vra:106756637; - - - - -}	{NA}	{GO:0005737; cytoplasm; cellular_component GO:0003700; sequence-specific DNA binding transcription factor activity; molecular_function GO:0006606; protein import into nucleus; biological_process GO:0006355; regulation of transcription, DNA-dependent; biological_process GO:0000226; microtubule cytoskeleton organization; biological_process GO:0006914; autophagy; biological_process GO:0007094; mitot…	{XM_003607653.2; Medicago truncatula BHLH domain class transcription factor mRNA}	{PF05557:Mitotic checkpoint protein PF07716:Basic region leucine zipper PF07926:TPR/MLP1/MLP2-like protein PF03148:Tektin family PF06005:Protein of unknown function (DUF904) PF00901:Orbivirus outer capsid protein VP5 PF04111:Autophagy protein Apg6}
i0_HQ_c11583/f4p0/968	{GAU26200.1; hypothetical protein TSUD_354220, partial [Trifolium subterraneum]}	{sp|Q9FX83|NDS8B_ARATH; NADH dehydrogenase [ubiquinone] iron-sulfur protein 8-B, mitochondrial OS=Arabidopsis thaliana GN=At1g16700 PE=1 SV=1}	{mtr:MTR_8g010570; K03941 NDUFS8 NADH dehydrogenase (ubiquinone) Fe-S protein 8 [EC:1.6.5.3 1.6.99.3] 1.6.5.3,1.6.99.3 ko00190; Metabolism; Energy metabolism; Oxidative phosphorylation | ko05010; Human Diseases; Neurodegenerative diseases; Alzheimer's disease | ko05012; Human Diseases; Neurodegenerative diseases; Parkinson's disease | ko05016; Human Diseases; Neurodegenerative diseases; Huntingto…	{At1g16700; KOG3256 NADH:ubiquinone oxidoreductase, NDUFS8/23 kDa subunit C Energy production and conversion ;}	{GO:0046332; SMAD binding; molecular_function GO:0055114; oxidation-reduction process; biological_process GO:0051536; iron-sulfur cluster binding; molecular_function GO:0004174; electron-transferring-flavoprotein dehydrogenase activity; molecular_function}	{BT053250.1; Medicago truncatula clone MTYFP_FQ_FR_FS1G-B-20 unknown mRNA}	{PF12800:4Fe-4S binding domain PF13237:4Fe-4S dicluster domain PF00037:4Fe-4S binding domain PF13183:4Fe-4S dicluster domain PF08782:c-SKI Smad4 binding domain PF13746:4Fe-4S dicluster domain PF05187:Electron transfer flavoprotein-ubiquinone oxidoreductase, 4Fe-4S PF12838:4Fe-4S dicluster domain PF12837:4Fe-4S binding domain PF12797:4Fe-4S binding domain PF12798:4Fe-4S binding domain PF13187:4Fe-…
i0_HQ_c11584/f2p3/375	{GAU18337.1; hypothetical protein TSUD_202260 [Trifolium subterraneum]}	{sp|Q9SNX8|GAPN_APIGR; NADP-dependent glyceraldehyde-3-phosphate dehydrogenase OS=Apium graveolens PE=1 SV=1}	{adu:107459095; K00131 gapN glyceraldehyde-3-phosphate dehydrogenase (NADP+) 1.2.1.9 ko01200; Metabolism; Global and overview maps; Carbon metabolism | ko00010; Metabolism; Carbohydrate metabolism; Glycolysis / Gluconeogenesis | ko00030; Metabolism; Carbohydrate metabolism; Pentose phosphate pathway}	{At2g24270; KOG2450 Aldehyde dehydrogenase C Energy production and conversion ;}	{NA}	{XM_003610302.2; Medicago truncatula NADP-dependent glyceraldehyde-3-phosphate dehydrogenase mRNA}	{NA}
i0_HQ_c115885/f3p3/743	{GAU20178.1; hypothetical protein TSUD_352420 [Trifolium subterraneum]}	{sp|Q41932|PSBQ2_ARATH; Oxygen-evolving enhancer protein 3-2, chloroplastic OS=Arabidopsis thaliana GN=PSBQ2 PE=1 SV=2}	{mtr:MTR_8g005175; K08901 psbQ photosystem II oxygen-evolving enhancer protein 3 - ko00195; Metabolism; Energy metabolism; Photosynthesis}	{NA}	{GO:0009654; oxygen evolving complex; cellular_component GO:0009523; photosystem II; cellular_component GO:0005509; calcium ion binding; molecular_function GO:0019898; extrinsic to membrane; cellular_component GO:0015979; photosynthesis; biological_process}	{XM_013588294.1; Medicago truncatula oxygen-evolving enhancer protein mRNA}	{PF05757:Oxygen evolving enhancer protein 3 (PsbQ)}
i0_HQ_c11590/f2p4/865	{GAU12444.1; hypothetical protein TSUD_229780 [Trifolium subterraneum]}	{sp|Q28BZ1|RBM8A_XENTR; RNA-binding protein 8A OS=Xenopus tropicalis GN=rbm8a PE=2 SV=1}	{var:108320789; K12876 RBM8A, Y14 RNA-binding protein 8A - ko03040; Genetic Information Processing; Transcription; Spliceosome | ko03013; Genetic Information Processing; Translation; RNA transport | ko03015; Genetic Information Processing; Translation; mRNA surveillance pathway}	{At1g51510; KOG0130 RNA-binding protein RBM8/Tsunagi (RRM superfamily) R General function prediction only ;}	{GO:0003676; nucleic acid binding; molecular_function}	{XM_004511443.2; PREDICTED: Cicer arietinum RNA-binding protein 8A (LOC101499840), mRNA}	{PF00076:RNA recognition motif. (a.k.a. RRM, RBD, or RNP domain)}
i0_HQ_c115902/f2p1/519	{XP_013447198.1; hypothetical protein MTR_8g099465 [Medicago truncatula]}	{NA}	{mtr:MTR_8g099465; - - - - -}	{NA}	{NA}	{XM_013591744.1; Medicago truncatula hypothetical protein mRNA}	{NA}
i0_HQ_c115998/f2p1/771	{GAU33847.1; hypothetical protein TSUD_393550 [Trifolium subterraneum]}	{sp|Q06931|ABR17_PEA; ABA-responsive protein ABR17 OS=Pisum sativum PE=2 SV=1}	{vra:106760214; - - - - -}	{NA}	{GO:0006952; defense response; biological_process GO:0009607; response to biotic stimulus; biological_process}	{AY059460.1; Trifolium repens cold responsive protein TRVSP mRNA, complete cds}	{PF00407:Pathogenesis-related protein Bet v I family}
i0_HQ_c116107/f2p1/456	{NA}	{NA}	{NA}	{NA}	{NA}	{NA}	{NA}
i0_HQ_c11617/f11p0/650	{GAU48345.1; hypothetical protein TSUD_267700 [Trifolium subterraneum]}	{NA}	{adu:107472666; - - - - -}	{NA}	{NA}	{XM_003605409.2; Medicago truncatula hypothetical protein mRNA}	{NA}
i0_HQ_c11621/f2p1/476	{GAU15777.1; hypothetical protein TSUD_235930 [Trifolium subterraneum]}	{sp|Q941A6|SDH6_ARATH; Succinate dehydrogenase subunit 6, mitochondrial OS=Arabidopsis thaliana GN=SDH6 PE=1 SV=1}	{lang:109341406; - - - - -; lang:109341406; - - - - -}	{NA}	{NA}	{XM_003607861.2; Medicago truncatula surface antigen family protein, putative partial mRNA}	{NA}
i0_HQ_c11622/f3p4/744	{GAU29889.1; hypothetical protein TSUD_379790 [Trifolium subterraneum]}	{sp|O49636|MPC4_ARATH; Mitochondrial pyruvate carrier 4 OS=Arabidopsis thaliana GN=MPC4 PE=3 SV=1}	{vvi:100247570; - - - - -}	{At4g22310; KOG1589 Uncharacterized conserved protein S Function unknown ;}	{GO:0005743; mitochondrial inner membrane; cellular_component GO:0006850; mitochondrial pyruvate transport; biological_process}	{XM_004486149.2; PREDICTED: Cicer arietinum mitochondrial pyruvate carrier 4 (LOC101489860), mRNA}	{PF03650:Uncharacterised protein family (UPF0041)}
i0_HQ_c11623/f2p0/1003	{XP_004500306.1; PREDICTED: protein LIGHT-DEPENDENT SHORT HYPOCOTYLS 5 [Cicer arietinum]}	{sp|Q9LMK2|LSH6_ARATH; Protein LIGHT-DEPENDENT SHORT HYPOCOTYLS 6 OS=Arabidopsis thaliana GN=LSH6 PE=1 SV=1}	{jcu:105639518; - - - - -}	{NA}	{GO:0000287; magnesium ion binding; molecular_function}	{XM_003599294.2; Medicago truncatula DUF640 family protein mRNA}	{PF00016:Ribulose bisphosphate carboxylase large chain, catalytic domain}
i0_HQ_c11627/f3p2/732	{GAU16497.1; hypothetical protein TSUD_167290 [Trifolium subterraneum]}	{sp|P0C8K6|RM02_ORYSA; 60S ribosomal protein L2, mitochondrial OS=Oryza sativa GN=RPL2 PE=3 SV=1}	{mtr:MTR_7g007070; - - - - -}	{At2g07715; KOG0438 Mitochondrial/chloroplast ribosomal protein L2 J Translation, ribosomal structure and biogenesis ;}	{GO:0005840; ribosome; cellular_component GO:0005622; intracellular; cellular_component GO:0003735; structural constituent of ribosome; molecular_function GO:0006412; translation; biological_process}	{XM_004489056.2; PREDICTED: Cicer arietinum 60S ribosomal protein L2, mitochondrial (LOC101499829), mRNA}	{PF00181:Ribosomal Proteins L2, RNA binding domain}
i0_HQ_c116351/f3p4/434	{XP_013450314.1; 40S ribosomal SA-like protein [Medicago truncatula]}	{sp|O65751|RSSA_CICAR; 40S ribosomal protein SA OS=Cicer arietinum GN=RAP40 PE=2 SV=1}	{pvu:PHAVU_010G125100g; K02998 RP-SAe, RPSA small subunit ribosomal protein SAe - ko03010; Genetic Information Processing; Translation; Ribosome}	{NA}	{NA}	{NA}	{NA}
i0_HQ_c116463/f2p1/622	{XP_013455191.1; Lipid transfer protein, partial [Medicago truncatula]}	{sp|O23758|NLTP_CICAR; Non-specific lipid-transfer protein OS=Cicer arietinum PE=3 SV=1}	{pvu:PHAVU_010G069100g; - - - - -}	{NA}	{NA}	{BT051321.1; Medicago truncatula clone MTYF1_F2_F3_F41G-H-6 unknown mRNA}	{NA}
i0_HQ_c11658/f2p3/870	{XP_013468393.1; glutaredoxin C4 [Medicago truncatula]}	{sp|Q0J3L4|GRS10_ORYSJ; Monothiol glutaredoxin-S10 OS=Oryza sativa subsp. japonica GN=GRXS10 PE=2 SV=2}	{cam:101508535; K03676 grxC, GLRX, GLRX2 glutaredoxin 3 - -}	{At2g20270; KOG1752 Glutaredoxin and related proteins O Posttranslational modification, protein turnover, chaperones ;}	{GO:0015035; protein disulfide oxidoreductase activity; molecular_function GO:0045454; cell redox homeostasis; biological_process GO:0009055; NA}	{XM_013612939.1; Medicago truncatula glutaredoxin C4 mRNA}	{PF00462:Glutaredoxin}
i0_HQ_c1166/f15p4/921	{GAU16814.1; hypothetical protein TSUD_200570 [Trifolium subterraneum]}	{sp|Q9MB35|PERQ_SEDLI; Peroxiredoxin Q, chloroplastic (Fragment) OS=Sedum lineare GN=PRXQ PE=1 SV=1}	{lang:109347889; K03564 BCP, PRXQ, DOT5 peroxiredoxin Q/BCP 1.11.1.15 -; lang:109347889; - - - - -}	{At3g26060; KOG0855 Alkyl hydroperoxide reductase, thiol specific antioxidant and related enzymes O Posttranslational modification, protein turnover, chaperones ;}	{GO:0006979; response to oxidative stress; biological_process GO:0016491; oxidoreductase activity; molecular_function GO:0055114; oxidation-reduction process; biological_process GO:0004602; glutathione peroxidase activity; molecular_function GO:0016209; NA}	{BT051537.1; Medicago truncatula clone MTYF1_F2_F3_F41G-D-24 unknown mRNA}	{PF08534:Redoxin PF00578:AhpC/TSA family PF00255:Glutathione peroxidase}
i0_HQ_c116611/f2p1/446	{XP_013458309.1; 60S ribosomal protein L29-1 [Medicago truncatula]}	{sp|Q9M7X7|RL291_ARATH; 60S ribosomal protein L29-1 OS=Arabidopsis thaliana GN=RPL29A PE=1 SV=1}	{vra:106760230; K02905 RP-L29e, RPL29 large subunit ribosomal protein L29e - ko03010; Genetic Information Processing; Translation; Ribosome}	{At3g06700; KOG3504 60S ribosomal protein L29 J Translation, ribosomal structure and biogenesis ;}	{NA}	{XM_004508104.2; PREDICTED: Cicer arietinum 60S ribosomal protein L29-1-like (LOC101507225), transcript variant X1, mRNA}	{NA}
i0_HQ_c116666/f4p0/398	{XP_004512591.1; PREDICTED: chlorophyll a-b binding protein CP26, chloroplastic [Cicer arietinum]}	{sp|Q9XF89|CB5_ARATH; Chlorophyll a-b binding protein CP26, chloroplastic OS=Arabidopsis thaliana GN=LHCB5 PE=1 SV=1}	{var:108346034; K08916 LHCB5 light-harvesting complex II chlorophyll a/b binding protein 5 - ko00196; Metabolism; Energy metabolism; Photosynthesis - antenna proteins}	{NA}	{NA}	{XM_013596958.1; Medicago truncatula light-harvesting complex I chlorophyll A/B-binding protein mRNA}	{NA}
i0_HQ_c11676/f2p6/447	{GAU30508.1; hypothetical protein TSUD_18880 [Trifolium subterraneum]}	{sp|Q56WD9|THIK2_ARATH; 3-ketoacyl-CoA thiolase 2, peroxisomal OS=Arabidopsis thaliana GN=PED1 PE=1 SV=2}	{cam:101514461; K07513 ACAA1 acetyl-CoA acyltransferase 1 2.3.1.16 ko01212; Metabolism; Global and overview maps; Fatty acid metabolism | ko00071; Metabolism; Lipid metabolism; Fatty acid degradation | ko00592; Metabolism; Lipid metabolism; alpha-Linolenic acid metabolism | ko01040; Metabolism; Lipid metabolism; Biosynthesis of unsaturated fatty acids | ko00280; Metabolism; Amino acid metabolism;…	{At2g33150; KOG1389 3-oxoacyl CoA thiolase I Lipid transport and metabolism ;}	{NA}	{XM_013611760.1; Medicago truncatula 3-ketoacyl-CoA thiolase 2, peroxisomal-like protein mRNA}	{NA}
i0_HQ_c11677/f2p0/828	{NA}	{NA}	{NA}	{NA}	{NA}	{NA}	{NA}
i0_HQ_c11680/f4p3/856	{XP_007147068.1; hypothetical protein PHAVU_006G093500g [Phaseolus vulgaris]}	{sp|Q53YF3|SPC3B_ARATH; Signal peptidase complex subunit 3B OS=Arabidopsis thaliana GN=At5g27430 PE=2 SV=1}	{pmum:103344667; K12948 SPCS3, SPC3 signal peptidase complex subunit 3 3.4.-.- ko03060; Genetic Information Processing; Folding, sorting and degradation; Protein export}	{At5g27430; KOG3372 Signal peptidase complex subunit U Intracellular trafficking, secretion, and vesicular transport ;}	{GO:0008233; peptidase activity; molecular_function GO:0006465; signal peptide processing; biological_process GO:0016021; integral to membrane; cellular_component GO:0005787; signal peptidase complex; cellular_component}	{XM_003626262.2; Medicago truncatula signal peptidase complex subunit 3B-like protein mRNA}	{PF04573:Signal peptidase subunit}
i0_HQ_c116985/f2p1/576	{GAU28029.1; hypothetical protein TSUD_264870 [Trifolium subterraneum]}	{sp|P43399|MT1_TRIRP; Metallothionein-like protein 1 OS=Trifolium repens GN=MT1B PE=3 SV=1}	{adu:107474868; - - - - -}	{At3g09390; KOG4738 Predicted metallothionein P Inorganic ion transport and metabolism ;}	{GO:0008270; zinc ion binding; molecular_function GO:0046872; metal ion binding; molecular_function GO:0034968; histone lysine methylation; biological_process GO:0005634; nucleus; cellular_component GO:0018024; histone-lysine N-methyltransferase activity; molecular_function}	{Z26493.1; T.repens TrMT1B mRNA for metallothionein-like protein}	{PF02068:Plant PEC family metallothionein PF01439:Metallothionein PF05033:Pre-SET motif PF00131:Metallothionein}
i0_HQ_c117024/f4p1/596	{XP_013466563.1; 1-aminocyclopropane-1-carboxylate oxidase-like protein [Medicago truncatula]}	{sp|Q94A78|ACCH4_ARATH; 1-aminocyclopropane-1-carboxylate oxidase homolog 4 OS=Arabidopsis thaliana GN=At1g03400 PE=2 SV=1}	{lja:Lj0g3v0205419.1; - - - - -}	{At1g03400; KOG0143 Iron/ascorbate family oxidoreductases QR Secondary metabolites biosynthesis, transport and catabolism ; General function prediction only ;}	{GO:0016491; oxidoreductase activity; molecular_function GO:0016706; oxidoreductase activity, acting on paired donors, with incorporation or reduction of molecular oxygen, 2-oxoglutarate as one donor, and incorporation of one atom each of oxygen into both donors; molecular_function GO:0055114; oxidation-reduction process; biological_process}	{XM_004498202.2; PREDICTED: Cicer arietinum 1-aminocyclopropane-1-carboxylate oxidase homolog 4-like (LOC101488870), mRNA}	{PF03171:2OG-Fe(II) oxygenase superfamily}
i0_HQ_c11703/f8p0/910	{XP_003602765.1; ubiquitin-conjugating enzyme E2, putative [Medicago truncatula]}	{sp|Q9FI61|UBC27_ARATH; Ubiquitin-conjugating enzyme E2 27 OS=Arabidopsis thaliana GN=UBC27 PE=2 SV=1}	{pvu:PHAVU_009G163400g; K04649 HIP2, UBC1 ubiquitin-conjugating enzyme (huntingtin interacting protein 2) 2.3.2.23 ko04120; Genetic Information Processing; Folding, sorting and degradation; Ubiquitin mediated proteolysis}	{At5g50870; KOG0418 Ubiquitin-protein ligase O Posttranslational modification, protein turnover, chaperones ;}	{GO:0006412; translation; biological_process GO:0003735; structural constituent of ribosome; molecular_function GO:0008982; protein-N(PI)-phosphohistidine-sugar phosphotransferase activity; molecular_function GO:0009405; pathogenesis; biological_process GO:0005515; protein binding; molecular_function GO:0015031; protein transport; biological_process GO:0016881; acid-amino acid ligase activity; mo…	{BT148054.1; Medicago truncatula clone JCVI-FLMt-5L9 unknown mRNA}	{PF05773:RWD domain PF08069:Ribosomal S13/S15 N-terminal domain PF05743:UEV domain PF00367:phosphotransferase system, EIIB PF00179:Ubiquitin-conjugating enzyme PF00627:UBA/TS-N domain PF09392:Type III secretion needle MxiH, YscF, SsaG, EprI, PscF, EscF}
i0_HQ_c117047/f2p3/747	{NA}	{NA}	{NA}	{NA}	{NA}	{XM_003624635.2; Medicago truncatula dehydrin mRNA}	{NA}
i0_HQ_c11711/f3p6/476	{ACG25088.1; histone H3 [Zea mays]}	{sp|Q3C2E5|H33_LOLMU; Histone H3.3 OS=Lolium multiflorum GN=RH3 PE=2 SV=3}	{thj:104809355; K11253 H3 histone H3 - ko05202; Human Diseases; Cancers: Overview; Transcriptional misregulation in cancer | ko05322; Human Diseases; Immune diseases; Systemic lupus erythematosus | ko05034; Human Diseases; Substance dependence; Alcoholism}	{At4g40030; KOG1745 Histones H3 and H4 B Chromatin structure and dynamics ;}	{NA}	{BT138990.1; Medicago truncatula clone JCVI-FLMt-8J2 unknown mRNA}	{NA}
i0_HQ_c117171/f2p0/978	{AAR10886.1; chlorophyll a/b binding protein [Trifolium pratense]}	{sp|P07371|CB22_PEA; Chlorophyll a-b binding protein AB80, chloroplastic OS=Pisum sativum GN=AB80 PE=1 SV=1}	{csv:101211276; K08912 LHCB1 light-harvesting complex II chlorophyll a/b binding protein 1 - ko00196; Metabolism; Energy metabolism; Photosynthesis - antenna proteins}	{NA}	{GO:0003824; NA GO:0046872; metal ion binding; molecular_function}	{AY430082.1; Trifolium pratense chlorophyll a/b binding protein mRNA, complete cds; nuclear gene for chloroplast product}	{PF10143:2,3-bisphosphoglycerate-independent phosphoglycerate mutase}
i0_HQ_c117227/f2p0/780	{GAU37476.1; hypothetical protein TSUD_207120 [Trifolium subterraneum]}	{sp|Q06930|ABR18_PEA; ABA-responsive protein ABR18 OS=Pisum sativum PE=2 SV=1}	{cam:101499736; - - - - -}	{NA}	{GO:0006952; defense response; biological_process GO:0009607; response to biotic stimulus; biological_process}	{XM_013602837.1; Medicago truncatula pathogenesis-related protein bet V I family protein mRNA}	{PF00407:Pathogenesis-related protein Bet v I family}
i0_HQ_c11724/f2p0/823	{GAU20745.1; hypothetical protein TSUD_231590 [Trifolium subterraneum]}	{sp|O23714|PSB2A_ARATH; Proteasome subunit beta type-2-A OS=Arabidopsis thaliana GN=PBD1 PE=1 SV=1}	{pvu:PHAVU_007G004300g; K02734 PSMB2 20S proteasome subunit beta 4 3.4.25.1 ko03050; Genetic Information Processing; Folding, sorting and degradation; Proteasome}	{At3g22630; KOG0177 20S proteasome, regulatory subunit beta type PSMB2/PRE1 O Posttranslational modification, protein turnover, chaperones ;}	{GO:0005839; proteasome core complex; cellular_component GO:0004298; threonine-type endopeptidase activity; molecular_function GO:0051603; proteolysis involved in cellular protein catabolic process; biological_process}	{XM_003611251.2; Medicago truncatula 20S proteasome beta protein mRNA}	{PF00227:Proteasome subunit}
i0_HQ_c11725/f2p0/775	{NA}	{NA}	{NA}	{NA}	{NA}	{XM_003624635.2; Medicago truncatula dehydrin mRNA}	{NA}
i0_HQ_c11729/f2p1/880	{GAU31765.1; hypothetical protein TSUD_22110 [Trifolium subterraneum]}	{sp|Q9SJM6|SAP4_ARATH; Zinc finger A20 and AN1 domain-containing stress-associated protein 4 OS=Arabidopsis thaliana GN=SAP4 PE=1 SV=1}	{lang:109338666; - - - - -; lang:109338666; - - - - -}	{At2g36320; KOG3173 Predicted Zn-finger protein R General function prediction only ;}	{GO:0008270; zinc ion binding; molecular_function GO:0003677; DNA binding; molecular_function}	{XM_004516138.2; PREDICTED: Cicer arietinum zinc finger A20 and AN1 domain-containing stress-associated protein 4-like (LOC101513920), mRNA}	{PF01754:A20-like zinc finger PF01428:AN1-like Zinc finger}
i0_HQ_c11734/f2p4/427	{XP_003607891.1; secondary thiamine-phosphate synthase enzyme [Medicago truncatula]}	{sp|O14155|YE72_SCHPO; UPF0047 protein C4A8.02c OS=Schizosaccharomyces pombe (strain 972 / ATCC 24843) GN=SPAC4A8.02c PE=3 SV=1}	{var:108333309; - - - - -}	{At1g21060_2; KOG3267 Uncharacterized conserved protein S Function unknown ;}	{NA}	{XM_003607843.2; Medicago truncatula secondary thiamine-phosphate synthase enzyme mRNA}	{NA}
i0_HQ_c1174/f26p6/811	{AAQ21119.1; ferredoxin I [Trifolium pratense]}	{sp|P09911|FER1_PEA; Ferredoxin-1, chloroplastic OS=Pisum sativum GN=PETF PE=1 SV=2}	{cam:101508579; K02639 petF ferredoxin - ko00195; Metabolism; Energy metabolism; Photosynthesis}	{NA}	{GO:0051536; iron-sulfur cluster binding; molecular_function GO:0009055; NA}	{AY340639.1; Trifolium pratense ferredoxin I mRNA, complete cds; nuclear gene for chloroplast product}	{PF00111:2Fe-2S iron-sulfur cluster binding domain}
i0_HQ_c11740/f5p1/805	{GAU41664.1; hypothetical protein TSUD_272480 [Trifolium subterraneum]}	{NA}	{pvu:PHAVU_011G101000g; - - - - -}	{NA}	{NA}	{XM_004506192.2; PREDICTED: Cicer arietinum uncharacterized LOC101514172 (LOC101514172), mRNA}	{NA}
i0_HQ_c117408/f2p0/642	{GAU30834.1; hypothetical protein TSUD_267540 [Trifolium subterraneum]}	{sp|O23758|NLTP_CICAR; Non-specific lipid-transfer protein OS=Cicer arietinum PE=3 SV=1}	{pvu:PHAVU_010G066400g; - - - - -}	{NA}	{NA}	{BT051321.1; Medicago truncatula clone MTYF1_F2_F3_F41G-H-6 unknown mRNA}	{NA}
i0_HQ_c11744/f2p2/791	{EPS74167.1; hypothetical protein M569_00588, partial [Genlisea aurea]}	{NA}	{NA}	{NA}	{NA}	{KJ476730.1; Trifolium meduseum chloroplast, complete genome}	{NA}
i0_HQ_c117448/f3p0/793	{GAU33847.1; hypothetical protein TSUD_393550 [Trifolium subterraneum]}	{sp|Q06931|ABR17_PEA; ABA-responsive protein ABR17 OS=Pisum sativum PE=2 SV=1}	{vra:106760214; - - - - -}	{NA}	{GO:0009607; response to biotic stimulus; biological_process GO:0006952; defense response; biological_process}	{AY059460.1; Trifolium repens cold responsive protein TRVSP mRNA, complete cds}	{PF00407:Pathogenesis-related protein Bet v I family}
i0_HQ_c11749/f6p1/617	{GAU41581.1; hypothetical protein TSUD_271900, partial [Trifolium subterraneum]}	{NA}	{vra:106755728; - - - - -}	{NA}	{NA}	{XM_004507160.2; PREDICTED: Cicer arietinum uncharacterized LOC101507118 (LOC101507118), mRNA}	{NA}
i0_HQ_c1175/f13p1/934	{GAU22741.1; hypothetical protein TSUD_138650 [Trifolium subterraneum]}	{NA}	{var:108344621; - - - - -}	{At1g13350; KOG0670 U4/U6-associated splicing factor PRP4 A RNA processing and modification ;}	{NA}	{XM_013597561.1; Medicago truncatula hypothetical protein mRNA}	{NA}
i0_HQ_c117588/f2p0/637	{GAU30834.1; hypothetical protein TSUD_267540 [Trifolium subterraneum]}	{sp|O23758|NLTP_CICAR; Non-specific lipid-transfer protein OS=Cicer arietinum PE=3 SV=1}	{pvu:PHAVU_010G066400g; - - - - -}	{NA}	{NA}	{BT051321.1; Medicago truncatula clone MTYF1_F2_F3_F41G-H-6 unknown mRNA}	{NA}
i0_HQ_c1176/f9p3/536	{GAU35323.1; hypothetical protein TSUD_337150 [Trifolium subterraneum]}	{NA}	{cam:101490254; - - - - -}	{NA}	{NA}	{BT134494.1; Medicago truncatula clone JCVI-FLMt-1F14 unknown mRNA}	{NA}
i0_HQ_c11763/f2p1/590	{XP_004511259.1; PREDICTED: dirigent protein 21 [Cicer arietinum]}	{sp|Q67YM6|DIR11_ARATH; Dirigent protein 11 OS=Arabidopsis thaliana GN=DIR11 PE=2 SV=1}	{vra:106761312; - - - - -}	{NA}	{NA}	{BT142603.1; Medicago truncatula clone JCVI-FLMt-1P23 unknown mRNA}	{NA}
i0_HQ_c11769/f4p1/740	{GAU21942.1; hypothetical protein TSUD_110820 [Trifolium subterraneum]}	{NA}	{cam:101508085; - - - - -}	{NA}	{NA}	{XM_004488710.2; PREDICTED: Cicer arietinum uncharacterized LOC101508085 (LOC101508085), transcript variant X1, mRNA}	{NA}
i0_HQ_c11775/f3p2/872	{GAU23743.1; hypothetical protein TSUD_128470 [Trifolium subterraneum]}	{sp|Q39218|SAT3_ARATH; Serine acetyltransferase 3, mitochondrial OS=Arabidopsis thaliana GN=SAT3 PE=1 SV=3}	{bvg:104891831; K00640 cysE serine O-acetyltransferase 2.3.1.30 ko01200; Metabolism; Global and overview maps; Carbon metabolism | ko01230; Metabolism; Global and overview maps; Biosynthesis of amino acids | ko00920; Metabolism; Energy metabolism; Sulfur metabolism | ko00270; Metabolism; Amino acid metabolism; Cysteine and methionine metabolism | ko05111; Cellular Processes; Cellular community - …	{At3g13110; KOG4750 Serine O-acetyltransferase E Amino acid transport and metabolism ;}	{NA}	{XM_004506631.2; PREDICTED: Cicer arietinum serine acetyltransferase 1, chloroplastic-like (LOC101505585), mRNA}	{NA}
i0_HQ_c117752/f2p1/637	{GAU50704.1; hypothetical protein TSUD_301090 [Trifolium subterraneum]}	{sp|O23758|NLTP_CICAR; Non-specific lipid-transfer protein OS=Cicer arietinum PE=3 SV=1}	{pvu:PHAVU_010G069100g; - - - - -}	{NA}	{NA}	{BT051321.1; Medicago truncatula clone MTYF1_F2_F3_F41G-H-6 unknown mRNA}	{NA}
i0_HQ_c117880/f3p0/619	{GAU16238.1; hypothetical protein TSUD_298700 [Trifolium subterraneum]}	{sp|P24929|RK12_TOBAC; 50S ribosomal protein L12, chloroplastic OS=Nicotiana tabacum GN=RPL12 PE=1 SV=1}	{cam:101494223; K02935 RP-L7, MRPL12, rplL large subunit ribosomal protein L7/L12 - ko03010; Genetic Information Processing; Translation; Ribosome}	{At3g27830; KOG1715 Mitochondrial/chloroplast ribosomal protein L12 J Translation, ribosomal structure and biogenesis ;}	{GO:0005840; ribosome; cellular_component GO:0003735; structural constituent of ribosome; molecular_function GO:0005622; intracellular; cellular_component GO:0006412; translation; biological_process}	{XM_004489202.2; PREDICTED: Cicer arietinum 50S ribosomal protein L12, chloroplastic-like (LOC101494223), mRNA}	{PF00542:Ribosomal protein L7/L12 C-terminal domain}
i0_HQ_c117905/f2p0/923	{GAU11654.1; hypothetical protein TSUD_334670 [Trifolium subterraneum]}	{NA}	{cam:101515523; - - - - -}	{NA}	{NA}	{XM_013594444.1; Medicago truncatula DUF761 domain protein mRNA}	{NA}
i0_HQ_c117913/f2p0/578	{GAU37370.1; hypothetical protein TSUD_277440 [Trifolium subterraneum]}	{sp|P17673|RBS_TRIRP; Ribulose bisphosphate carboxylase small chain, chloroplastic OS=Trifolium repens GN=RBCS PE=3 SV=1}	{cam:105851539; K01602 rbcS ribulose-bisphosphate carboxylase small chain 4.1.1.39 ko01200; Metabolism; Global and overview maps; Carbon metabolism | ko00630; Metabolism; Carbohydrate metabolism; Glyoxylate and dicarboxylate metabolism | ko00710; Metabolism; Energy metabolism; Carbon fixation in photosynthetic organisms}	{NA}	{NA}	{AF056315.1; Medicago sativa ribulose-1,5-bisphosphate carboxylase small subunit mRNA, nuclear gene encoding chloroplast protein, complete cds}	{NA}
i0_HQ_c118022/f2p0/982	{AHB24929.1; chloroplast light-harvesting complex II chlorophyll a/b binding protein 1 [Sedum alfredii]}	{sp|P27490|CB28_PEA; Chlorophyll a-b binding protein 8, chloroplastic OS=Pisum sativum GN=CAB8 PE=1 SV=1}	{var:108343733; K08912 LHCB1 light-harvesting complex II chlorophyll a/b binding protein 1 - ko00196; Metabolism; Energy metabolism; Photosynthesis - antenna proteins}	{NA}	{GO:0003824; NA GO:0046872; metal ion binding; molecular_function}	{AY430082.1; Trifolium pratense chlorophyll a/b binding protein mRNA, complete cds; nuclear gene for chloroplast product}	{PF10143:2,3-bisphosphoglycerate-independent phosphoglycerate mutase}
i0_HQ_c118142/f2p0/392	{NA}	{NA}	{NA}	{NA}	{NA}	{NA}	{NA}
i0_HQ_c11817/f2p0/748	{JAT67893.1; 60S ribosomal protein L28 [Anthurium amnicola]}	{sp|O14069|RL28E_SCHPO; Probable 60S ribosomal protein L28e OS=Schizosaccharomyces pombe (strain 972 / ATCC 24843) GN=rpl44 PE=1 SV=1}	{ppp:PHYPADRAFT_53881; K02903 RP-L28e, RPL28 large subunit ribosomal protein L28e - ko03010; Genetic Information Processing; Translation; Ribosome}	{SPAC1687.06c; KOG3412 60S ribosomal protein L28 J Translation, ribosomal structure and biogenesis ;}	{NA}	{NA}	{NA}
i0_HQ_c118197/f2p4/424	{XP_004514586.1; PREDICTED: RNA-binding protein 12-like [Cicer arietinum]}	{NA}	{cam:101494925; - - - - -}	{NA}	{NA}	{NA}	{NA}
i0_HQ_c11826/f3p5/573	{GAU21814.1; hypothetical protein TSUD_176600 [Trifolium subterraneum]}	{sp|A9UY97|SERIC_MONBE; Probable serine incorporator OS=Monosiga brevicollis GN=serinc PE=3 SV=1}	{cam:101489045; - - - - -}	{At1g16180; KOG2592 Tumor differentially expressed (TDE) protein S Function unknown ;}	{GO:0016020; membrane; cellular_component}	{XM_013593318.1; Medicago truncatula serinc-domain serine and sphingolipid biosynthesis protein mRNA}	{PF03348:Serine incorporator (Serinc)}
i0_HQ_c118349/f2p0/557	{GAU21196.1; hypothetical protein TSUD_11130 [Trifolium subterraneum]}	{sp|Q9ZT05|PSAK_MEDSA; Photosystem I reaction center subunit psaK, chloroplastic OS=Medicago sativa GN=PSAK PE=2 SV=1}	{vra:106760980; K02698 psaK photosystem I subunit X - ko00195; Metabolism; Energy metabolism; Photosynthesis}	{NA}	{GO:0016020; membrane; cellular_component GO:0015979; photosynthesis; biological_process GO:0009522; photosystem I; cellular_component}	{XM_013610795.1; Medicago truncatula photosystem I reaction center subunit X psaK mRNA}	{PF01241:Photosystem I psaG / psaK}
i0_HQ_c1184/f10p2/772	{GAU24088.1; hypothetical protein TSUD_388810 [Trifolium subterraneum]}	{NA}	{NA}	{NA}	{NA}	{XM_003593208.2; Medicago truncatula leguminosin group485 secreted peptide mRNA}	{NA}
i0_HQ_c11842/f3p6/999	{GAU32680.1; hypothetical protein TSUD_218570 [Trifolium subterraneum]}	{sp|O04300|UPTG_PEA; Alpha-1,4-glucan-protein synthase [UDP-forming] OS=Pisum sativum GN=UPTG PE=1 SV=1}	{cam:101496708; K13379 RGP, UTM reversibly glycosylated polypeptide / UDP-arabinopyranose mutase [EC:2.4.1.- 5.4.99.30] 2.4.1.-,5.4.99.30 ko00520; Metabolism; Carbohydrate metabolism; Amino sugar and nucleotide sugar metabolism}	{NA}	{GO:0016866; intramolecular transferase activity; molecular_function GO:0030244; cellulose biosynthetic process; biological_process}	{XM_003614140.2; Medicago truncatula alpha-1,4-glucan-protein synthase [UDP-forming]-like protein mRNA}	{PF03214:Reversibly glycosylated polypeptide}
i0_HQ_c11853/f5p3/666	{GAU36272.1; hypothetical protein TSUD_255260 [Trifolium subterraneum]}	{NA}	{NA}	{NA}	{NA}	{NA}	{NA}
i0_HQ_c11855/f2p0/460	{XP_003611278.1; adenine phosphoribosyltransferase-like protein [Medicago truncatula]}	{sp|Q9SU38|APT4_ARATH; Adenine phosphoribosyltransferase 4 OS=Arabidopsis thaliana GN=APT4 PE=1 SV=1}	{gmx:100790431; K00759 APRT, apt adenine phosphoribosyltransferase 2.4.2.7 ko00230; Metabolism; Nucleotide metabolism; Purine metabolism}	{At4g12440; KOG1712 Adenine phosphoribosyl transferases F Nucleotide transport and metabolism ;}	{GO:0000287; magnesium ion binding; molecular_function GO:0004749; ribose phosphate diphosphokinase activity; molecular_function GO:0003743; translation initiation factor activity; molecular_function GO:0006413; translational initiation; biological_process GO:0009116; nucleoside metabolic process; biological_process GO:0009165; nucleotide biosynthetic process; biological_process}	{XM_003611230.2; Medicago truncatula adenine phosphoribosyltransferase-like protein mRNA}	{PF14572:Phosphoribosyl synthetase-associated domain PF00156:Phosphoribosyl transferase domain PF04189:Gcd10p family}
i0_HQ_c118563/f3p0/554	{GAU29912.1; hypothetical protein TSUD_148200 [Trifolium subterraneum]}	{NA}	{adu:107478917; - - - - -}	{NA}	{NA}	{XM_003601136.2; Medicago truncatula phloem specific protein mRNA}	{NA}
i0_HQ_c11860/f2p0/974	{AAR10886.1; chlorophyll a/b binding protein [Trifolium pratense]}	{sp|P04782|CB24_PETSP; Chlorophyll a-b binding protein 25, chloroplastic OS=Petunia sp. GN=CAB25 PE=3 SV=1}	{bdi:100822184; K08912 LHCB1 light-harvesting complex II chlorophyll a/b binding protein 1 - ko00196; Metabolism; Energy metabolism; Photosynthesis - antenna proteins}	{NA}	{NA}	{AY430082.1; Trifolium pratense chlorophyll a/b binding protein mRNA, complete cds; nuclear gene for chloroplast product}	{NA}
i0_HQ_c11864/f2p2/908	{GAU48549.1; hypothetical protein TSUD_99550 [Trifolium subterraneum]}	{sp|Q03666|GSTX4_TOBAC; Probable glutathione S-transferase OS=Nicotiana tabacum PE=2 SV=1}	{cam:101515160; K00799 GST, gst glutathione S-transferase 2.5.1.18 ko00480; Metabolism; Metabolism of other amino acids; Glutathione metabolism | ko00980; Metabolism; Xenobiotics biodegradation and metabolism; Metabolism of xenobiotics by cytochrome P450 | ko00982; Metabolism; Xenobiotics biodegradation and metabolism; Drug metabolism - cytochrome P450 | ko05204; Human Diseases; Cancers: Overview…	{At1g17180; KOG0406 Glutathione S-transferase O Posttranslational modification, protein turnover, chaperones ;}	{GO:0005515; protein binding; molecular_function}	{XM_004488650.2; PREDICTED: Cicer arietinum probable glutathione S-transferase (LOC101515160), mRNA}	{PF13409:Glutathione S-transferase, N-terminal domain PF02798:Glutathione S-transferase, N-terminal domain PF13417:Glutathione S-transferase, N-terminal domain}
i0_HQ_c11866/f3p0/812	{GAU13429.1; hypothetical protein TSUD_127250 [Trifolium subterraneum]}	{NA}	{adu:107494906; - - - - -}	{NA}	{NA}	{XM_013604664.1; Medicago truncatula maternal effect embryo arrest protein, putative mRNA}	{NA}
i0_HQ_c11868/f3p14/908	{XP_003596916.1; DnaJ-class molecular chaperone [Medicago truncatula]}	{sp|P42824|DNJH2_ALLPO; DnaJ protein homolog 2 OS=Allium porrum GN=LDJ2 PE=2 SV=1}	{cic:CICLE_v10028531mg; K09503 DNAJA2 DnaJ homolog subfamily A member 2 - ko04141; Genetic Information Processing; Folding, sorting and degradation; Protein processing in endoplasmic reticulum}	{At3g44110; KOG0712 Molecular chaperone (DnaJ superfamily) O Posttranslational modification, protein turnover, chaperones ;}	{NA}	{XM_003596868.2; Medicago truncatula DnaJ-class molecular chaperone mRNA}	{NA}
i0_HQ_c118726/f2p0/961	{AAA66288.1; proline-rich protein [Glycine max]}	{NA}	{pvu:PHAVU_009G211300g; - - - - -}	{NA}	{GO:0030261; chromosome condensation; biological_process GO:0005199; structural constituent of cell wall; molecular_function GO:0003677; DNA binding; molecular_function}	{AB043102.1; Trifolium repens mRNA for TrPRP2, complete cds}	{PF02095:Extensin-like protein repeat PF07382:Histone H1-like nucleoprotein HC2}
i0_HQ_c11873/f3p0/703	{XP_013456843.1; u6 snRNA-associated-like-Smprotein [Medicago truncatula]}	{sp|Q8VYI0|LSM8_ARATH; Sm-like protein LSM8 OS=Arabidopsis thaliana GN=LSM8 PE=1 SV=1}	{lja:Lj0g3v0170419.1; K12627 LSM8 U6 snRNA-associated Sm-like protein LSm8 - ko03040; Genetic Information Processing; Transcription; Spliceosome | ko03018; Genetic Information Processing; Folding, sorting and degradation; RNA degradation}	{At1g65700; KOG1784 Small Nuclear ribonucleoprotein splicing factor A RNA processing and modification ;}	{NA}	{XM_004512860.2; PREDICTED: Cicer arietinum sm-like protein LSM8 (LOC101498142), mRNA}	{NA}
i0_HQ_c11880/f3p2/565	{GAU37577.1; hypothetical protein TSUD_154100 [Trifolium subterraneum]}	{NA}	{gmx:100527812; - - - - -}	{NA}	{NA}	{XM_004504583.2; PREDICTED: Cicer arietinum uncharacterized LOC101504085 (LOC101504085), mRNA}	{NA}
i0_HQ_c11883/f2p0/376	{XP_019443467.1; PREDICTED: ABC transporter G family member 11-like [Lupinus angustifolius]}	{sp|Q8RXN0|AB11G_ARATH; ABC transporter G family member 11 OS=Arabidopsis thaliana GN=ABCG11 PE=1 SV=1}	{lang:109358625; - - - - -; lang:109358625; - - - - -}	{At1g17840; KOG0061 Transporter, ABC superfamily (Breast cancer resistance protein) Q Secondary metabolites biosynthesis, transport and catabolism ;}	{NA}	{XM_013597176.1; Medicago truncatula white-brown-complex ABC transporter family protein, putative mRNA}	{NA}
i0_HQ_c11885/f2p7/458	{XP_004489265.1; PREDICTED: tetraketide alpha-pyrone reductase 2 [Cicer arietinum]}	{NA}	{cam:101496371; - - - - -}	{At5g14700; KOG1502 Flavonol reductase/cinnamoyl-CoA reductase V Defense mechanisms ;}	{GO:0016491; oxidoreductase activity; molecular_function GO:0008152; NA GO:0008152; NA GO:0016491; oxidoreductase activity; molecular_function}	{XM_013596013.1; Medicago truncatula cinnamoyl-CoA reductase mRNA}	{PF00106:short chain dehydrogenase PF00106:short chain dehydrogenase}
i0_HQ_c1189/f13p2/894	{GAU15119.1; hypothetical protein TSUD_08570 [Trifolium subterraneum]}	{sp|Q9SZY7|VATO1_ARATH; V-type proton ATPase subunit c''1 OS=Arabidopsis thaliana GN=VHA-c''1 PE=1 SV=1}	{sind:105164181; K03661 ATPeV0B, ATP6F V-type H+-transporting ATPase 21kDa proteolipid subunit - ko00190; Metabolism; Energy metabolism; Oxidative phosphorylation | ko04145; Cellular Processes; Transport and catabolism; Phagosome | ko04142; Cellular Processes; Transport and catabolism; Lysosome | ko04721; Organismal Systems; Nervous system; Synaptic vesicle cycle | ko05323; Human Diseases; Immune…	{At2g25610; KOG0233 Vacuolar H+-ATPase V0 sector, subunit c'' C Energy production and conversion ;}	{GO:0015991; ATP hydrolysis coupled proton transport; biological_process GO:0033177; proton-transporting two-sector ATPase complex, proton-transporting domain; cellular_component GO:0015078; hydrogen ion transmembrane transporter activity; molecular_function}	{XM_003624995.2; Medicago truncatula vacuolar proton-ATPase subunit C proteolipid protein mRNA}	{PF00137:ATP synthase subunit C}
i0_HQ_c11890/f2p0/869	{GAU24799.1; hypothetical protein TSUD_157120 [Trifolium subterraneum]}	{sp|Q850K7|EXLB1_ORYSJ; Expansin-like B1 OS=Oryza sativa subsp. japonica GN=EXLB1 PE=2 SV=2}	{adu:107483974; - - - - -}	{NA}	{NA}	{XM_012718161.1; PREDICTED: Cicer arietinum expansin-like B1 (LOC101507544), transcript variant X2, mRNA}	{NA}
i0_HQ_c11908/f5p55/478	{XP_003627034.2; drug resistance transporter-like ABC domain protein [Medicago truncatula]}	{sp|Q9XIE2|AB36G_ARATH; ABC transporter G family member 36 OS=Arabidopsis thaliana GN=ABCG36 PE=1 SV=1}	{mtr:MTR_8g014360; - - - - -}	{At1g59870; KOG0065 Pleiotropic drug resistance proteins (PDR1-15), ABC superfamily Q Secondary metabolites biosynthesis, transport and catabolism ;}	{NA}	{XM_003626987.2; Medicago truncatula drug resistance transporter-like ABC domain protein mRNA}	{NA}
i0_HQ_c11912/f6p3/728	{GAU50645.1; hypothetical protein TSUD_184370 [Trifolium subterraneum]}	{sp|P14009|14KD_DAUCA; 14 kDa proline-rich protein DC2.15 OS=Daucus carota PE=2 SV=1}	{gmx:100499693; - - - - -}	{NA}	{NA}	{XM_003608693.1; Medicago truncatula Lipid transfer protein mRNA}	{NA}
i0_HQ_c1192/f11p1/1097	{GAU15170.1; hypothetical protein TSUD_09080 [Trifolium subterraneum]}	{NA}	{NA}	{NA}	{NA}	{NA}	{NA}
i0_HQ_c119210/f2p1/478	{XP_003600159.1; serine-glyoxylate aminotransferase-like protein [Medicago truncatula]}	{sp|Q56YA5|SGAT_ARATH; Serine--glyoxylate aminotransferase OS=Arabidopsis thaliana GN=AGT1 PE=1 SV=2}	{csv:101217893; K00830 AGXT alanine-glyoxylate transaminase / serine-glyoxylate transaminase / serine-pyruvate transaminase [EC:2.6.1.44 2.6.1.45 2.6.1.51] 2.6.1.44,2.6.1.45,2.6.1.51 ko01200; Metabolism; Global and overview maps; Carbon metabolism | ko00630; Metabolism; Carbohydrate metabolism; Glyoxylate and dicarboxylate metabolism | ko00680; Metabolism; Energy metabolism; Methane metabolism | …	{At2g13360; KOG2862 Alanine-glyoxylate aminotransferase AGT1 R General function prediction only ;}	{NA}	{XM_003600111.2; Medicago truncatula serine-glyoxylate aminotransferase-like protein mRNA}	{NA}
i0_HQ_c1193/f17p8/764	{XP_004508713.1; PREDICTED: eukaryotic translation initiation factor 5A-2 [Cicer arietinum]}	{sp|P56336|IF5A4_SOLTU; Eukaryotic translation initiation factor 5A-4 OS=Solanum tuberosum GN=EIF5A4 PE=2 SV=1}	{var:108331344; K03263 EIF5A translation initiation factor 5A - -}	{At1g13950; KOG3271 Translation initiation factor 5A (eIF-5A) J Translation, ribosomal structure and biogenesis ;}	{GO:0003723; RNA binding; molecular_function GO:0003746; translation elongation factor activity; molecular_function GO:0045901; positive regulation of translational elongation; biological_process GO:0006452; translational frameshifting; biological_process GO:0045905; positive regulation of translational termination; biological_process GO:0043022; ribosome binding; molecular_function}	{XM_013603917.1; Medicago truncatula eukaryotic translation initiation factor 5A4 mRNA}	{PF01287:Eukaryotic elongation factor 5A hypusine, DNA-binding OB fold}
i0_HQ_c119392/f2p1/843	{BAE71195.1; hypothetical protein, partial [Trifolium pratense]}	{NA}	{NA}	{NA}	{NA}	{AB236743.1; Trifolium pratense RNA for hypothetical protein, partial cds, clone: C1390}	{NA}
i0_HQ_c11940/f2p0/845	{GAU36983.1; hypothetical protein TSUD_150190 [Trifolium subterraneum]}	{NA}	{vra:106756823; - - - - -}	{NA}	{NA}	{XM_012715892.1; PREDICTED: Cicer arietinum uncharacterized LOC101502977 (LOC101502977), transcript variant X1, mRNA}	{NA}
i0_HQ_c119408/f2p0/613	{XP_013455191.1; Lipid transfer protein, partial [Medicago truncatula]}	{sp|O23758|NLTP_CICAR; Non-specific lipid-transfer protein OS=Cicer arietinum PE=3 SV=1}	{pvu:PHAVU_010G066400g; - - - - -}	{NA}	{NA}	{BT051321.1; Medicago truncatula clone MTYF1_F2_F3_F41G-H-6 unknown mRNA}	{NA}
i0_HQ_c11942/f2p94/557	{GAU23602.1; hypothetical protein TSUD_385910 [Trifolium subterraneum]}	{NA}	{cam:101510178; - - - - -}	{NA}	{NA}	{XM_003593596.2; Medicago truncatula homeobox domain protein partial mRNA}	{NA}
i0_HQ_c11949/f5p3/819	{XP_013450704.1; hypothetical protein MTR_6g004140 [Medicago truncatula]}	{NA}	{vra:106759676; - - - - -}	{NA}	{NA}	{XM_004505501.2; PREDICTED: Cicer arietinum uncharacterized LOC101503424 (LOC101503424), mRNA}	{NA}
i0_HQ_c11950/f2p0/956	{GAU32781.1; hypothetical protein TSUD_152290 [Trifolium subterraneum]}	{NA}	{vra:106761259; - - - - -}	{NA}	{GO:0006313; transposition, DNA-mediated; biological_process GO:0003677; DNA binding; molecular_function GO:0004803; transposase activity; molecular_function GO:0000228; nuclear chromosome; cellular_component}	{XM_013603894.1; Medicago truncatula crossover junction endodeoxyribonuclease, putative mRNA}	{PF04824:Conserved region of Rad21 / Rec8 like protein PF01548:Transposase}
i0_HQ_c119519/f2p1/439	{XP_018825482.1; PREDICTED: serine--glyoxylate aminotransferase [Juglans regia]}	{sp|Q56YA5|SGAT_ARATH; Serine--glyoxylate aminotransferase OS=Arabidopsis thaliana GN=AGT1 PE=1 SV=2}	{csv:101217893; K00830 AGXT alanine-glyoxylate transaminase / serine-glyoxylate transaminase / serine-pyruvate transaminase [EC:2.6.1.44 2.6.1.45 2.6.1.51] 2.6.1.44,2.6.1.45,2.6.1.51 ko01200; Metabolism; Global and overview maps; Carbon metabolism | ko00630; Metabolism; Carbohydrate metabolism; Glyoxylate and dicarboxylate metabolism | ko00680; Metabolism; Energy metabolism; Methane metabolism | …	{At2g13360; KOG2862 Alanine-glyoxylate aminotransferase AGT1 R General function prediction only ;}	{NA}	{XM_003600111.2; Medicago truncatula serine-glyoxylate aminotransferase-like protein mRNA}	{NA}
i0_HQ_c11953/f2p2/404	{GAU50465.1; hypothetical protein TSUD_240630 [Trifolium subterraneum]}	{NA}	{cam:101500284; K09338 HD-ZIP homeobox-leucine zipper protein - -}	{NA}	{NA}	{XM_003613530.2; Medicago truncatula homeobox leucine zipper family protein mRNA}	{NA}
i0_HQ_c11954/f2p3/815	{GAU29712.1; hypothetical protein TSUD_264480 [Trifolium subterraneum]}	{sp|Q9M325|IPCS1_ARATH; Phosphatidylinositol:ceramide inositolphosphotransferase 1 OS=Arabidopsis thaliana GN=IPCS1 PE=2 SV=1}	{cam:101495845; - - - - -}	{At3g54020; KOG3058 Uncharacterized conserved protein S Function unknown ;}	{GO:0003824; NA GO:0016020; membrane; cellular_component}	{XM_013599496.1; Medicago truncatula plant inositol phosphorylceramide synthase mRNA}	{PF01569:PAP2 superfamily}
i0_HQ_c11965/f2p6/383	{NA}	{NA}	{NA}	{NA}	{NA}	{XM_013597199.1; Medicago truncatula AGC family Serine/Threonine kinase family protein mRNA}	{NA}
i0_HQ_c11966/f2p0/972	{GAU16170.1; hypothetical protein TSUD_298000 [Trifolium subterraneum]}	{sp|Q9SUE0|YMG12_ARATH; YlmG homolog protein 1-2, chloroplastic OS=Arabidopsis thaliana GN=YLMG1-2 PE=2 SV=1}	{cit:102630904; - - - - -}	{NA}	{GO:0016020; membrane; cellular_component}	{XM_013599049.1; Medicago truncatula YGGT family protein mRNA}	{PF02325:YGGT family}
i0_HQ_c11978/f3p8/904	{XP_003611464.1; glycine cleavage system H protein [Medicago truncatula]}	{sp|P16048|GCSH_PEA; Glycine cleavage system H protein, mitochondrial OS=Pisum sativum GN=GDCSH PE=1 SV=1}	{csv:101222346; K02437 gcvH, GCSH glycine cleavage system H protein - ko00630; Metabolism; Carbohydrate metabolism; Glyoxylate and dicarboxylate metabolism | ko00260; Metabolism; Amino acid metabolism; Glycine, serine and threonine metabolism}	{At1g32470; KOG3373 Glycine cleavage system H protein (lipoate-binding) E Amino acid transport and metabolism ;}	{GO:0005960; glycine cleavage complex; cellular_component GO:0006546; glycine catabolic process; biological_process}	{XM_003611416.2; Medicago truncatula glycine cleavage system H protein mRNA}	{PF01597:Glycine cleavage H-protein}
i0_HQ_c11989/f3p2/620	{GAU21348.1; hypothetical protein TSUD_189350 [Trifolium subterraneum]}	{sp|O22715|AP1M2_ARATH; AP-1 complex subunit mu-2 OS=Arabidopsis thaliana GN=AP1M2 PE=1 SV=1}	{cam:101509788; K12393 AP1M AP-1 complex subunit mu - ko04142; Cellular Processes; Transport and catabolism; Lysosome}	{At1g60780; KOG0937 Adaptor complexes medium subunit family U Intracellular trafficking, secretion, and vesicular transport ;}	{NA}	{XM_013590694.1; Medicago truncatula clathrin assembly protein AP47, putative mRNA}	{NA}
i0_HQ_c11995/f2p10/510	{GAU20148.1; hypothetical protein TSUD_352100 [Trifolium subterraneum]}	{sp|Q9ZRI7|EF1G1_ORYSJ; Elongation factor 1-gamma 1 OS=Oryza sativa subsp. japonica GN=Os02g0220600 PE=2 SV=1}	{cam:101496237; K03233 EEF1G elongation factor 1-gamma - ko05134; Human Diseases; Infectious diseases: Bacterial; Legionellosis}	{At1g09640_2; KOG1627 Translation elongation factor EF-1 gamma J Translation, ribosomal structure and biogenesis ;}	{NA}	{XM_013604591.1; Medicago truncatula translation elongation factor EF1B, gamma chain mRNA}	{NA}
i0_HQ_c11996/f2p18/382	{NA}	{NA}	{NA}	{NA}	{NA}	{NA}	{NA}
i0_HQ_c12009/f2p0/936	{XP_003625225.1; rhodanese/cell cycle control phosphatase superfamily protein [Medicago truncatula]}	{sp|O48529|STR9_ARATH; Rhodanese-like domain-containing protein 9, chloroplastic OS=Arabidopsis thaliana GN=STR9 PE=2 SV=1}	{cam:101501352; - - - - -}	{NA}	{NA}	{XM_003625177.2; Medicago truncatula rhodanese/cell cycle control phosphatase superfamily protein mRNA}	{NA}
i0_HQ_c120128/f2p1/879	{GAU23128.1; hypothetical protein TSUD_305760 [Trifolium subterraneum]}	{sp|P10822|ICW3_PSOTE; Chymotrypsin inhibitor 3 OS=Psophocarpus tetragonolobus PE=1 SV=2}	{vra:106767274; - - - - -}	{NA}	{GO:0004866; endopeptidase inhibitor activity; molecular_function GO:0004866; endopeptidase inhibitor activity; molecular_function}	{XM_013606426.1; Medicago truncatula Kunitz type trypsin inhibitor mRNA}	{PF00197:Trypsin and protease inhibitor PF00197:Trypsin and protease inhibitor}
i0_HQ_c12013/f8p1/736	{GAU22391.1; hypothetical protein TSUD_107200 [Trifolium subterraneum]}	{sp|P27788|FER3_MAIZE; Ferredoxin-3, chloroplastic OS=Zea mays GN=FDX3 PE=2 SV=1}	{aip:107629324; K02639 petF ferredoxin - ko00195; Metabolism; Energy metabolism; Photosynthesis}	{NA}	{GO:0009055; NA GO:0051536; iron-sulfur cluster binding; molecular_function}	{XM_003596775.2; Medicago truncatula 2Fe-2S ferredoxin superfamily protein mRNA}	{PF00111:2Fe-2S iron-sulfur cluster binding domain}
i0_HQ_c120154/f2p0/597	{GAU50704.1; hypothetical protein TSUD_301090 [Trifolium subterraneum]}	{sp|O23758|NLTP_CICAR; Non-specific lipid-transfer protein OS=Cicer arietinum PE=3 SV=1}	{pvu:PHAVU_010G069100g; - - - - -}	{NA}	{NA}	{BT051321.1; Medicago truncatula clone MTYF1_F2_F3_F41G-H-6 unknown mRNA}	{NA}
i0_HQ_c12030/f2p4/412	{NA}	{NA}	{NA}	{NA}	{NA}	{XM_012712033.1; PREDICTED: Cicer arietinum eukaryotic translation initiation factor 5B-like (LOC101498932), mRNA}	{NA}
i0_HQ_c12031/f2p0/542	{NA}	{NA}	{NA}	{NA}	{NA}	{NA}	{NA}
i0_HQ_c12032/f4p4/427	{GAU18131.1; hypothetical protein TSUD_248320 [Trifolium subterraneum]}	{sp|O81363|RS4_PRUAR; 40S ribosomal protein S4 OS=Prunus armeniaca GN=RPS4 PE=2 SV=1}	{cam:101510766; K02987 RP-S4e, RPS4 small subunit ribosomal protein S4e - ko03010; Genetic Information Processing; Translation; Ribosome}	{At5g07090; KOG0378 40S ribosomal protein S4 J Translation, ribosomal structure and biogenesis ;}	{NA}	{XM_004490956.2; PREDICTED: Cicer arietinum 40S ribosomal protein S4-1-like (LOC101510766), mRNA}	{NA}
i0_HQ_c120451/f3p3/907	{NA}	{NA}	{NA}	{NA}	{NA}	{XM_003594176.2; Medicago truncatula hypothetical protein mRNA}	{NA}
i0_HQ_c1205/f31p4/507	{XP_003630120.1; iron-sulfur cluster assembly protein IscA [Medicago truncatula]}	{sp|Q9XIK3|ISCAP_ARATH; Iron-sulfur assembly protein IscA, chloroplastic OS=Arabidopsis thaliana GN=ISCA PE=2 SV=2}	{mtr:MTR_8g092030; K13628 iscA, ISCA1 iron-sulfur cluster assembly protein - -}	{At1g10500; KOG1120 Fe-S cluster biosynthesis protein ISA1 (contains a HesB-like domain) P Inorganic ion transport and metabolism ;}	{NA}	{BT134758.1; Medicago truncatula clone JCVI-FLMt-8B16 unknown mRNA}	{NA}
i0_HQ_c120529/f2p0/614	{XP_013455191.1; Lipid transfer protein, partial [Medicago truncatula]}	{sp|O23758|NLTP_CICAR; Non-specific lipid-transfer protein OS=Cicer arietinum PE=3 SV=1}	{pvu:PHAVU_010G069100g; - - - - -}	{NA}	{NA}	{BT051321.1; Medicago truncatula clone MTYF1_F2_F3_F41G-H-6 unknown mRNA}	{NA}
i0_HQ_c12055/f2p7/776	{GAU13192.1; hypothetical protein TSUD_179350 [Trifolium subterraneum]}	{sp|Q505I4|CO040_RAT; UPF0235 protein C15orf40 homolog OS=Rattus norvegicus PE=2 SV=1}	{pvu:PHAVU_009G147900g; K09131 K09131 uncharacterized protein - -}	{At1g49170; KOG3276 Uncharacterized conserved protein, contains YggU domain S Function unknown ;}	{NA}	{XM_003602511.2; Medicago truncatula UPF0235 C15orf40-like protein mRNA}	{NA}
i0_HQ_c12059/f5p0/940	{NA}	{NA}	{NA}	{NA}	{NA}	{NA}	{NA}
i0_HQ_c120605/f30p3/630	{XP_019463643.1; PREDICTED: small nuclear ribonucleoprotein E-like [Lupinus angustifolius]}	{sp|P62303|RUXE_CHICK; Small nuclear ribonucleoprotein E OS=Gallus gallus GN=SNRPE PE=3 SV=1}	{lang:109355349; K11097 SNRPE, SME small nuclear ribonucleoprotein E - ko03040; Genetic Information Processing; Transcription; Spliceosome; lang:109355349; - - - - -}	{At2g18740; KOG1774 Small nuclear ribonucleoprotein E A RNA processing and modification ;}	{NA}	{XM_004490578.2; PREDICTED: Cicer arietinum small nuclear ribonucleoprotein E-like (LOC101514094), mRNA}	{NA}
i0_HQ_c120607/f18p5/529	{XP_010089763.1; 60S ribosomal protein L37a [Morus notabilis]}	{sp|Q9XHE4|RL37A_GOSHI; 60S ribosomal protein L37a OS=Gossypium hirsutum GN=RPL37A PE=3 SV=1}	{mtr:MTR_0199s0040; K02921 RP-L37Ae, RPL37A large subunit ribosomal protein L37Ae - ko03010; Genetic Information Processing; Translation; Ribosome}	{At3g10950; KOG0402 60S ribosomal protein L37 J Translation, ribosomal structure and biogenesis ;}	{GO:0005840; ribosome; cellular_component GO:0006412; translation; biological_process GO:0005622; intracellular; cellular_component GO:0003735; structural constituent of ribosome; molecular_function}	{XM_003608771.2; Medicago truncatula 60S ribosomal protein L37a-2 mRNA}	{PF01780:Ribosomal L37ae protein family}
i0_HQ_c120608/f19p3/574	{GAU46951.1; hypothetical protein TSUD_180550 [Trifolium subterraneum]}	{NA}	{mtr:MTR_7g065160; - - - - -}	{NA}	{GO:0016020; membrane; cellular_component}	{XM_003623113.2; Medicago truncatula Lipid transfer protein mRNA}	{PF01284:Membrane-associating domain}
i0_HQ_c120610/f24p5/791	{XP_013446625.1; chaperone DnaJ domain protein [Medicago truncatula]}	{sp|Q9SDN0|DNJ20_ARATH; Chaperone protein dnaJ 20, chloroplastic OS=Arabidopsis thaliana GN=ATJ20 PE=1 SV=2}	{mtr:MTR_8g081620; - - - - -}	{At4g13830; KOG0712 Molecular chaperone (DnaJ superfamily) O Posttranslational modification, protein turnover, chaperones ;}	{NA}	{XM_013591171.1; Medicago truncatula chaperone DnaJ domain protein mRNA}	{NA}
i0_HQ_c120612/f10p3/786	{XP_003604064.1; mago nashi family, integral exon junction complex protein [Medicago truncatula]}	{sp|P49030|MGN_ORYSJ; Protein mago nashi homolog OS=Oryza sativa subsp. japonica GN=Os12g0287200 PE=2 SV=2}	{var:108346240; K12877 MAGOH protein mago nashi - ko03040; Genetic Information Processing; Transcription; Spliceosome | ko03013; Genetic Information Processing; Translation; RNA transport | ko03015; Genetic Information Processing; Translation; mRNA surveillance pathway}	{At1g02140; KOG3392 Exon-exon junction complex, Magoh component A RNA processing and modification ;}	{GO:0005634; nucleus; cellular_component}	{XM_003604016.2; Medicago truncatula mago nashi family, integral exon junction complex protein partial mRNA}	{PF02792:Mago nashi protein}
i0_HQ_c120613/f30p6/484	{XP_004498593.1; PREDICTED: probable plastid-lipid-associated protein 8, chloroplastic [Cicer arietinum]}	{sp|Q941D3|PAP8_ARATH; Probable plastid-lipid-associated protein 8, chloroplastic OS=Arabidopsis thaliana GN=PAP8 PE=1 SV=1}	{lang:109357644; - - - - -; lang:109357644; - - - - -}	{NA}	{NA}	{XM_013610288.1; Medicago truncatula plastid lipid-associated protein mRNA}	{NA}
i0_HQ_c120614/f37p3/543	{GAU34329.1; hypothetical protein TSUD_20360 [Trifolium subterraneum]}	{sp|Q9C7U8|SBT3H_ARATH; Subtilisin-like protease SBT3.17 OS=Arabidopsis thaliana GN=SBT3.17 PE=3 SV=1}	{adu:107477544; - - - - -}	{NA}	{GO:0042802; identical protein binding; molecular_function GO:0043086; negative regulation of catalytic activity; biological_process GO:0004252; serine-type endopeptidase activity; molecular_function}	{XM_003590206.2; Medicago truncatula peptidase inhibitor I9 mRNA}	{PF05922:Peptidase inhibitor I9}
i0_HQ_c120616/f12p0/782	{XP_003602740.1; electron transporter [Medicago truncatula]}	{sp|P04170|RUBR1_DESDA; Rubredoxin-1 OS=Desulfovibrio desulfuricans (strain ATCC 27774 / DSM 6949) GN=rd1 PE=1 SV=1}	{var:108334678; - - - - -}	{NA}	{GO:0005506; iron ion binding; molecular_function GO:0046872; metal ion binding; molecular_function GO:0006351; transcription, DNA-dependent; biological_process GO:0016151; nickel ion binding; molecular_function GO:0006464; protein modification process; biological_process GO:0003899; DNA-directed RNA polymerase activity; molecular_function GO:0003677; DNA binding; molecular_function GO:0004017; a…	{XM_003602692.2; Medicago truncatula electron transporter mRNA}	{PF00301:Rubredoxin PF00096:Zinc finger, C2H2 type PF05191:Adenylate kinase, active site lid PF02150:RNA polymerases M/15 Kd subunit PF01155:Hydrogenase/urease nickel incorporation, metallochaperone, hypA}
i0_HQ_c120618/f24p5/828	{GAU16339.1; hypothetical protein TSUD_116880 [Trifolium subterraneum]}	{sp|P17407|21KD_DAUCA; 21 kDa protein OS=Daucus carota PE=2 SV=1}	{lja:Lj0g3v0070759.1; - - - - -}	{NA}	{GO:0030599; pectinesterase activity; molecular_function GO:0004857; enzyme inhibitor activity; molecular_function}	{CR931739.1; Medicago truncatula chromosome 5 clone mth2-7j2, COMPLETE SEQUENCE}	{PF04043:Plant invertase/pectin methylesterase inhibitor}
i0_HQ_c120622/f19p3/904	{GAU40355.1; hypothetical protein TSUD_319670 [Trifolium subterraneum]}	{sp|Q94JX9|NACA2_ARATH; Nascent polypeptide-associated complex subunit alpha-like protein 2 OS=Arabidopsis thaliana GN=At3g49470 PE=2 SV=2}	{pvu:PHAVU_009G038400g; K03626 EGD2, NACA nascent polypeptide-associated complex subunit alpha - -}	{At3g49470; KOG2239 Transcription factor containing NAC and TS-N domains K Transcription ;}	{GO:0005634; nucleus; cellular_component GO:0000775; chromosome, centromeric region; cellular_component GO:0005681; spliceosomal complex; cellular_component GO:0006355; regulation of transcription, DNA-dependent; biological_process GO:0000398; nuclear mRNA splicing, via spliceosome; biological_process GO:0003677; DNA binding; molecular_function GO:0003682; chromatin binding; molecular_function}	{XM_003602354.2; Medicago truncatula nascent proteinassociated complex alpha chain mRNA}	{PF09026:Centromere protein B dimerisation domain PF04889:Cwf15/Cwc15 cell cycle control protein}
i0_HQ_c120625/f10p10/857	{XP_003612402.1; auxin efflux carrier family protein [Medicago truncatula]}	{NA}	{gmx:100792072; K07088 K07088 uncharacterized protein - -}	{NA}	{NA}	{XM_013598144.1; Medicago truncatula auxin efflux carrier family protein mRNA}	{NA}
i0_HQ_c120627/f7p5/713	{GAU44967.1; hypothetical protein TSUD_184680 [Trifolium subterraneum]}	{sp|Q02758|ATPD_PEA; ATP synthase delta chain, chloroplastic OS=Pisum sativum GN=ATPD PE=1 SV=1}	{lang:109358719; K02113 ATPF1D, atpH F-type H+-transporting ATPase subunit delta - ko00190; Metabolism; Energy metabolism; Oxidative phosphorylation | ko00195; Metabolism; Energy metabolism; Photosynthesis; lang:109358719; - - - - -}	{At4g09650; KOG1662 Mitochondrial F1F0-ATP synthase, subunit OSCP/ATP5 C Energy production and conversion ;}	{GO:0008608; attachment of spindle microtubules to kinetochore; biological_process GO:0015986; ATP synthesis coupled proton transport; biological_process GO:0042729; DASH complex; cellular_component GO:0005876; spindle microtubule; cellular_component GO:0046933; hydrogen ion transporting ATP synthase activity, rotational mechanism; molecular_function}	{XM_004515755.2; PREDICTED: Cicer arietinum ATP synthase delta chain, chloroplastic (LOC101512631), mRNA}	{PF00213:ATP synthase delta (OSCP) subunit PF08287:Spc19}
i0_HQ_c120629/f34p2/682	{GAU19311.1; hypothetical protein TSUD_335970 [Trifolium subterraneum]}	{sp|Q41228|PSAEA_NICSY; Photosystem I reaction center subunit IV A, chloroplastic OS=Nicotiana sylvestris GN=PSAEA PE=1 SV=1}	{cam:101510350; K02693 psaE photosystem I subunit IV - ko00195; Metabolism; Energy metabolism; Photosynthesis}	{NA}	{GO:0009522; photosystem I; cellular_component GO:0015979; photosynthesis; biological_process GO:0009538; photosystem I reaction center; cellular_component}	{XM_003625414.2; Medicago truncatula photosystem I reaction center subunit IV A mRNA}	{PF02427:Photosystem I reaction centre subunit IV / PsaE}
i0_HQ_c120632/f6p2/960	{XP_013470313.1; D-glycerate dehydrogenase/hydroxypyruvate reductase [Medicago truncatula]}	{sp|Q9C9W5|HPR1_ARATH; Glycerate dehydrogenase HPR, peroxisomal OS=Arabidopsis thaliana GN=HPR PE=1 SV=1}	{cam:101496862; K15893 HPR1 hydroxypyruvate reductase 1 - ko01200; Metabolism; Global and overview maps; Carbon metabolism | ko00630; Metabolism; Carbohydrate metabolism; Glyoxylate and dicarboxylate metabolism | ko00260; Metabolism; Amino acid metabolism; Glycine, serine and threonine metabolism}	{At1g68010; KOG0069 Glyoxylate/hydroxypyruvate reductase (D-isomer-specific 2-hydroxy acid dehydrogenase superfamily) C Energy production and conversion ;}	{GO:0048037; cofactor binding; molecular_function GO:0006098; pentose-phosphate shunt; biological_process GO:0008033; tRNA processing; biological_process GO:0003857; 3-hydroxyacyl-CoA dehydrogenase activity; molecular_function GO:0005488; NA GO:0046168; glycerol-3-phosphate catabolic process; biological_process GO:0006364; rRNA processing; biological_process GO:0006631; fatty acid metabolic proce…	{XM_013614859.1; Medicago truncatula D-glycerate dehydrogenase/hydroxypyruvate reductase mRNA}	{PF03446:NAD binding domain of 6-phosphogluconate dehydrogenase PF02737:3-hydroxyacyl-CoA dehydrogenase, NAD binding domain PF01210:NAD-dependent glycerol-3-phosphate dehydrogenase N-terminus PF01269:Fibrillarin PF02826:D-isomer specific 2-hydroxyacid dehydrogenase, NAD binding domain PF01497:Periplasmic binding protein PF07991:Acetohydroxy acid isomeroreductase, NADPH-binding domain PF02558:Keto…
i0_HQ_c120633/f10p2/761	{GAU18229.1; hypothetical protein TSUD_175700 [Trifolium subterraneum]}	{NA}	{vra:106758780; - - - - -}	{NA}	{NA}	{BT135453.1; Medicago truncatula clone JCVI-FLMt-7B1 unknown mRNA}	{NA}
i0_HQ_c120634/f5p2/887	{GAU13628.1; hypothetical protein TSUD_347320 [Trifolium subterraneum]}	{sp|Q8GWE1|UCH3_ARATH; Ubiquitin carboxyl-terminal hydrolase 3 OS=Arabidopsis thaliana GN=UCH3 PE=2 SV=1}	{lja:Lj0g3v0216769.1; K05609 UCHL3, YUH1 ubiquitin carboxyl-terminal hydrolase L3 3.4.19.12 -}	{At4g17510; KOG1415 Ubiquitin C-terminal hydrolase UCHL1 O Posttranslational modification, protein turnover, chaperones ;}	{GO:0005622; intracellular; cellular_component GO:0004221; ubiquitin thiolesterase activity; molecular_function GO:0006511; ubiquitin-dependent protein catabolic process; biological_process}	{XM_003608608.2; Medicago truncatula ubiquitin carboxyl-terminal hydrolase family protein mRNA}	{PF01088:Ubiquitin carboxyl-terminal hydrolase, family 1}
i0_HQ_c120636/f11p0/488	{XP_013456331.1; import receptor subunit TOM6-like protein [Medicago truncatula]}	{sp|Q9XIA7|TOM6_ARATH; Mitochondrial import receptor subunit TOM6 homolog OS=Arabidopsis thaliana GN=TOM6 PE=1 SV=1}	{cic:CICLE_v10029767mg; - - - - -}	{NA}	{NA}	{XM_013600877.1; Medicago truncatula import receptor subunit TOM6-like protein partial mRNA}	{NA}
i0_HQ_c120637/f12p5/581	{CAA41106.1; isoflavone reductase [Medicago sativa]}	{sp|P52575|IFR_MEDSA; Isoflavone reductase OS=Medicago sativa GN=IFR PE=1 SV=1}	{gmx:100778149; - - - - -}	{NA}	{NA}	{XM_003612003.2; Medicago truncatula isoflavone reductase-like protein mRNA}	{NA}
i0_HQ_c120641/f11p2/582	{GAU33999.1; hypothetical protein TSUD_212600 [Trifolium subterraneum]}	{sp|Q9C912|R35A3_ARATH; 60S ribosomal protein L35a-3 OS=Arabidopsis thaliana GN=RPL35AC PE=3 SV=1}	{cam:101489573; K02917 RP-L35Ae, RPL35A large subunit ribosomal protein L35Ae - ko03010; Genetic Information Processing; Translation; Ribosome}	{At1g07070; KOG0887 60S ribosomal protein L35A/L37 J Translation, ribosomal structure and biogenesis ;}	{GO:0005840; ribosome; cellular_component GO:0006364; rRNA processing; biological_process GO:0003735; structural constituent of ribosome; molecular_function GO:0005622; intracellular; cellular_component GO:0006412; translation; biological_process}	{XM_004512345.2; PREDICTED: Cicer arietinum 60S ribosomal protein L35a-1 (LOC101512796), mRNA}	{PF01782:RimM N-terminal domain PF01247:Ribosomal protein L35Ae}
i0_HQ_c120643/f10p48/565	{AIJ28261.1; NADH-plastoquinone oxidoreductase subunit 4 (chloroplast) [Trifolium pratense]}	{sp|Q9BBP3|NU4C_LOTJA; NAD(P)H-quinone oxidoreductase chain 4, chloroplastic OS=Lotus japonicus GN=ndhD PE=3 SV=1}	{mtr:MTR_7g021720; K05575 ndhD NAD(P)H-quinone oxidoreductase subunit 4 1.6.5.3 ko00190; Metabolism; Energy metabolism; Oxidative phosphorylation}	{AtCh073; KOG4845 NADH dehydrogenase, subunit 4 C Energy production and conversion ;}	{GO:0055114; oxidation-reduction process; biological_process GO:0008137; NADH dehydrogenase (ubiquinone) activity; molecular_function}	{EU849487.1; Trifolium subterraneum chloroplast, complete genome}	{PF00361:Proton-conducting membrane transporter}
i0_HQ_c120649/f5p2/387	{NA}	{NA}	{NA}	{NA}	{NA}	{XM_003596045.2; Medicago truncatula phosphoglycerate kinase-like protein mRNA}	{NA}
i0_HQ_c120653/f12p20/856	{GAU43536.1; hypothetical protein TSUD_98560 [Trifolium subterraneum]}	{sp|Q42961|PGKH_TOBAC; Phosphoglycerate kinase, chloroplastic OS=Nicotiana tabacum PE=2 SV=1}	{cam:101506903; K00927 PGK, pgk phosphoglycerate kinase 2.7.2.3 ko01200; Metabolism; Global and overview maps; Carbon metabolism | ko01230; Metabolism; Global and overview maps; Biosynthesis of amino acids | ko00010; Metabolism; Carbohydrate metabolism; Glycolysis / Gluconeogenesis | ko00710; Metabolism; Energy metabolism; Carbon fixation in photosynthetic organisms}	{At1g56190; KOG1367 3-phosphoglycerate kinase G Carbohydrate transport and metabolism ;}	{GO:0006096; glycolysis; biological_process GO:0005524; ATP binding; molecular_function GO:0004618; phosphoglycerate kinase activity; molecular_function GO:0000160; two-component signal transduction system (phosphorelay); biological_process GO:0003677; DNA binding; molecular_function GO:0000156; two-component response regulator activity; molecular_function}	{XM_003596043.2; Medicago truncatula phosphoglycerate kinase-like protein mRNA}	{PF00162:Phosphoglycerate kinase PF06506:Propionate catabolism activator}
i0_HQ_c120654/f23p0/597	{AHC70250.1; ribosomal protein S16 [Trifolium pratense]}	{sp|O65686|RS16A_ARATH; 30S ribosomal protein S16-1, chloroplastic OS=Arabidopsis thaliana GN=RPS16-1 PE=2 SV=1}	{cam:101513779; K02959 RP-S16, MRPS16, rpsP small subunit ribosomal protein S16 - ko03010; Genetic Information Processing; Translation; Ribosome}	{At4g34620; KOG3419 Mitochondrial/chloroplast ribosomal protein S16 J Translation, ribosomal structure and biogenesis ;}	{GO:0005840; ribosome; cellular_component GO:0006412; translation; biological_process GO:0003735; structural constituent of ribosome; molecular_function GO:0005622; intracellular; cellular_component}	{KF781546.1; Trifolium pratense ribosomal protein S16 (rps16) mRNA, complete cds}	{PF00886:Ribosomal protein S16}
i0_HQ_c120655/f13p2/864	{GAU32225.1; hypothetical protein TSUD_278050 [Trifolium subterraneum]}	{sp|Q9C514|RS71_ARATH; 40S ribosomal protein S7-1 OS=Arabidopsis thaliana GN=RPS7A PE=2 SV=1}	{lang:109358866; K02993 RP-S7e, RPS7 small subunit ribosomal protein S7e - ko03010; Genetic Information Processing; Translation; Ribosome; lang:109358866; - - - - -}	{At1g48830; KOG3320 40S ribosomal protein S7 J Translation, ribosomal structure and biogenesis ;}	{GO:0005622; intracellular; cellular_component GO:0003735; structural constituent of ribosome; molecular_function GO:0006412; translation; biological_process GO:0005840; ribosome; cellular_component}	{XM_003618717.2; Medicago truncatula 40S ribosomal S7-like protein mRNA}	{PF01251:Ribosomal protein S7e}
i0_HQ_c120656/f3p1/596	{GAU35924.1; hypothetical protein TSUD_69570 [Trifolium subterraneum]}	{NA}	{mtr:MTR_8g089655; - - - - -}	{NA}	{NA}	{XM_013591259.1; Medicago truncatula ribosomal-like protein, putative partial mRNA}	{NA}
i0_HQ_c120659/f3p0/826	{GAU32294.1; hypothetical protein TSUD_63110 [Trifolium subterraneum]}	{sp|Q9SGU2|SAU71_ARATH; Auxin-responsive protein SAUR71 OS=Arabidopsis thaliana GN=SAUR71 PE=2 SV=1}	{pvu:PHAVU_011G038000g; K14488 SAUR SAUR family protein - ko04075; Environmental Information Processing; Signal transduction; Plant hormone signal transduction}	{NA}	{NA}	{XM_003607042.2; Medicago truncatula SAUR-like auxin-responsive family protein mRNA}	{NA}
i0_HQ_c120667/f4p3/736	{XP_003594082.2; inhibitor of apoptosis-promoting Bax1 protein [Medicago truncatula]}	{sp|Q94A20|BI1L_ARATH; BI1-like protein OS=Arabidopsis thaliana GN=At4g15470 PE=2 SV=1}	{cam:101510082; K06890 K06890 uncharacterized protein - -}	{At1g03070; KOG2322 N-methyl-D-aspartate receptor glutamate-binding subunit T Signal transduction mechanisms ;}	{NA}	{XM_003594034.2; Medicago truncatula inhibitor of apoptosis-promoting Bax1 protein mRNA}	{NA}
i0_HQ_c120676/f4p58/843	{XP_007210385.1; hypothetical protein PRUPE_ppa001062mg [Prunus persica]}	{sp|P35100|CLPC_PEA; Chaperone protein ClpC, chloroplastic OS=Pisum sativum PE=2 SV=1}	{gmx:100796195; K03696 clpC ATP-dependent Clp protease ATP-binding subunit ClpC - -}	{At5g50920; KOG1051 Chaperone HSP104 and related ATP-dependent Clp proteases O Posttranslational modification, protein turnover, chaperones ;}	{GO:0005524; ATP binding; molecular_function}	{XM_013606199.1; Medicago truncatula ATP-dependent Clp protease ATP-binding subunit mRNA}	{PF07724:AAA domain (Cdc48 subfamily)}
i0_HQ_c120681/f19p0/419	{GAU48868.1; hypothetical protein TSUD_86020 [Trifolium subterraneum]}	{NA}	{NA}	{NA}	{NA}	{XM_013601653.1; Medicago truncatula hypothetical protein mRNA}	{NA}
i0_HQ_c120682/f6p0/794	{XP_003589460.1; protein disulfide-isomerase LQY1 [Medicago truncatula]}	{sp|K4BVL1|SPA_SOLLC; Protein SPA, chloroplastic OS=Solanum lycopersicum GN=SPA PE=2 SV=1}	{vra:106763867; - - - - -}	{NA}	{GO:0031072; heat shock protein binding; molecular_function GO:0051082; unfolded protein binding; molecular_function}	{XM_003589412.2; Medicago truncatula protein disulfide-isomerase LQY1 mRNA}	{PF00684:DnaJ central domain}
i0_HQ_c120683/f4p42/909	{XP_004488775.1; PREDICTED: uncharacterized protein LOC101510527 isoform X2 [Cicer arietinum]}	{sp|Q60700|M3K12_MOUSE; Mitogen-activated protein kinase kinase kinase 12 OS=Mus musculus GN=Map3k12 PE=1 SV=1}	{cam:101510527; - - - - -}	{At1g79570_2; KOG0192 Tyrosine kinase specific for activated (GTP-bound) p21cdc42Hs T Signal transduction mechanisms ;}	{GO:0006468; protein phosphorylation; biological_process GO:0005524; ATP binding; molecular_function GO:0004672; protein kinase activity; molecular_function}	{XM_004488718.1; PREDICTED: Cicer arietinum uncharacterized LOC101510527 (LOC101510527), transcript variant X2, mRNA}	{PF00069:Protein kinase domain PF07714:Protein tyrosine kinase}
i0_HQ_c120685/f3p3/385	{GAU38364.1; hypothetical protein TSUD_209430 [Trifolium subterraneum]}	{sp|Q9STS1|BADH2_ARATH; Betaine aldehyde dehydrogenase 2, mitochondrial OS=Arabidopsis thaliana GN=ALDH10A9 PE=2 SV=1}	{eus:EUTSA_v10010305mg; K00130 betB, gbsA betaine-aldehyde dehydrogenase 1.2.1.8 ko00260; Metabolism; Amino acid metabolism; Glycine, serine and threonine metabolism}	{At3g48170; KOG2450 Aldehyde dehydrogenase C Energy production and conversion ;}	{NA}	{AC136839.21; Medicago truncatula chromosome 8 clone mth2-13n2, complete sequence}	{NA}
i0_HQ_c120691/f13p1/936	{XP_013456166.1; adenine nucleotide alpha hydrolase superfamily protein [Medicago truncatula]}	{sp|Q8VYN9|PHO32_ARATH; Universal stress protein PHOS32 OS=Arabidopsis thaliana GN=PHOS32 PE=1 SV=1}	{vra:106754285; - - - - -}	{NA}	{GO:0006950; response to stress; biological_process}	{XM_013600712.1; Medicago truncatula adenine nucleotide alpha hydrolase superfamily protein mRNA}	{PF00582:Universal stress protein family}
i0_HQ_c120692/f4p5/564	{GAU39620.1; hypothetical protein TSUD_397090 [Trifolium subterraneum]}	{sp|Q9ZSK4|ADF3_ARATH; Actin-depolymerizing factor 3 OS=Arabidopsis thaliana GN=ADF3 PE=1 SV=1}	{cam:101512978; K05765 CFL cofilin - ko04810; Cellular Processes; Cell motility; Regulation of actin cytoskeleton | ko04666; Organismal Systems; Immune system; Fc gamma R-mediated phagocytosis | ko04360; Organismal Systems; Development; Axon guidance | ko05133; Human Diseases; Infectious diseases: Bacterial; Pertussis}	{At5g59880; KOG1735 Actin depolymerizing factor Z Cytoskeleton ;}	{NA}	{XM_004486365.1; PREDICTED: Cicer arietinum actin-depolymerizing factor 2 (LOC101512978), mRNA}	{NA}
i0_HQ_c12070/f5p0/701	{GAU19149.1; hypothetical protein TSUD_79720 [Trifolium subterraneum]}	{NA}	{mtr:MTR_8g089830; - - - - -}	{NA}	{NA}	{XM_013591294.1; Medicago truncatula hypothetical protein mRNA}	{NA}
i0_HQ_c120700/f2p8/896	{GAU22985.1; hypothetical protein TSUD_98130 [Trifolium subterraneum]}	{sp|Q9SGE0|AXS2_ARATH; UDP-D-apiose/UDP-D-xylose synthase 2 OS=Arabidopsis thaliana GN=AXS2 PE=2 SV=1}	{lang:109341907; K12449 AXS UDP-apiose/xylose synthase - ko00520; Metabolism; Carbohydrate metabolism; Amino sugar and nucleotide sugar metabolism; lang:109341907; - - - - -}	{At1g08200; KOG1429 dTDP-glucose 4-6-dehydratase/UDP-glucuronic acid decarboxylase GM Carbohydrate transport and metabolism ; Cell wall/membrane/envelope biogenesis ;}	{GO:0003824; NA GO:0009058; biosynthetic process; biological_process GO:0044237; cellular metabolic process; biological_process GO:0050662; coenzyme binding; molecular_function}	{XM_013600428.1; Medicago truncatula UDP-D-apiose/UDP-D-xylose synthase mRNA}	{PF02719:Polysaccharide biosynthesis protein PF01370:NAD dependent epimerase/dehydratase family}
i0_HQ_c120702/f7p0/541	{AFK47612.1; unknown [Medicago truncatula]}	{sp|Q39459|MT2_CICAR; Metallothionein-like protein 2 OS=Cicer arietinum PE=3 SV=2}	{cam:101504992; - - - - -}	{NA}	{NA}	{Z26492.1; T.repens TrMT1A mRNA for metallothionein-like protein}	{NA}
i0_HQ_c120703/f5p0/996	{GAU23615.1; hypothetical protein TSUD_386040 [Trifolium subterraneum]}	{sp|Q9LW49|ERF4_NICSY; Ethylene-responsive transcription factor 4 OS=Nicotiana sylvestris GN=ERF4 PE=2 SV=1}	{cam:101504527; K09286 EREBP EREBP-like factor - -}	{NA}	{GO:0006355; regulation of transcription, DNA-dependent; biological_process GO:0003700; sequence-specific DNA binding transcription factor activity; molecular_function}	{XM_003593582.2; Medicago truncatula ethylene response factor mRNA}	{PF00847:AP2 domain}
i0_HQ_c120704/f12p3/511	{XP_004507151.1; PREDICTED: transcription elongation factor B polypeptide 1 [Cicer arietinum]}	{sp|Q15369|ELOC_HUMAN; Elongin-C OS=Homo sapiens GN=ELOC PE=1 SV=1}	{vra:106758804; K03872 TCEB1 transcription elongation factor B, polypeptide 1 - ko04120; Genetic Information Processing; Folding, sorting and degradation; Ubiquitin mediated proteolysis | ko04066; Environmental Information Processing; Signal transduction; HIF-1 signaling pathway | ko05200; Human Diseases; Cancers: Overview; Pathways in cancer | ko05211; Human Diseases; Cancers: Specific types; Re…	{At5g59140; KOG3473 RNA polymerase II transcription elongation factor Elongin/SIII, subunit elongin C K Transcription ;}	{GO:0005515; protein binding; molecular_function GO:0006511; ubiquitin-dependent protein catabolic process; biological_process}	{XM_004507095.2; PREDICTED: Cicer arietinum transcription elongation factor B polypeptide 1 (LOC101510626), transcript variant X2, mRNA}	{PF03931:Skp1 family, tetramerisation domain PF00651:BTB/POZ domain}
i0_HQ_c120709/f3p1/390	{GAU34281.1; hypothetical protein TSUD_321270 [Trifolium subterraneum]}	{NA}	{NA}	{NA}	{NA}	{XM_003601857.2; Medicago truncatula hypothetical protein mRNA}	{NA}
i0_HQ_c120711/f73p14/634	{GAU27316.1; hypothetical protein TSUD_05420 [Trifolium subterraneum]}	{sp|Q948Z4|SNAK1_SOLTU; Snakin-1 OS=Solanum tuberosum GN=SN1 PE=1 SV=1}	{lja:Lj0g3v0096809.1; - - - - -}	{NA}	{NA}	{XM_003589066.2; Medicago truncatula gibberellin-regulated family protein mRNA}	{NA}
i0_HQ_c120712/f16p0/545	{GAU21457.1; hypothetical protein TSUD_32880 [Trifolium subterraneum]}	{sp|Q9XH46|TATA_PEA; Sec-independent protein translocase protein TATA, chloroplastic OS=Pisum sativum GN=TATA PE=1 SV=1}	{cam:101498594; K03116 tatA sec-independent protein translocase protein TatA - ko03060; Genetic Information Processing; Folding, sorting and degradation; Protein export | ko03070; Environmental Information Processing; Membrane transport; Bacterial secretion system}	{NA}	{GO:0015031; protein transport; biological_process GO:0008565; protein transporter activity; molecular_function}	{XM_013613529.1; Medicago truncatula twin arginine translocase mRNA}	{PF02416:mttA/Hcf106 family}
i0_HQ_c120715/f8p5/972	{XP_004501257.1; PREDICTED: uncharacterized protein LOC101501291 [Cicer arietinum]}	{NA}	{gmx:100781708; - - - - -}	{NA}	{NA}	{XM_003603468.2; Medicago truncatula transmembrane protein, putative mRNA}	{NA}
i0_HQ_c120716/f3p1/448	{GAU26365.1; hypothetical protein TSUD_101990 [Trifolium subterraneum]}	{sp|Q9FH37|ILR3_ARATH; Transcription factor ILR3 OS=Arabidopsis thaliana GN=ILR3 PE=1 SV=1}	{cit:102611674; - - - - -}	{NA}	{NA}	{XM_003596565.2; Medicago truncatula BHLH domain class transcription factor mRNA}	{NA}
i0_HQ_c120725/f6p15/956	{GAU36711.1; hypothetical protein TSUD_217680 [Trifolium subterraneum]}	{sp|P42653|1433A_VICFA; 14-3-3-like protein A OS=Vicia faba PE=2 SV=1}	{csv:101220164; K06630 YWHAE 14-3-3 protein epsilon - ko04011; Environmental Information Processing; Signal transduction; MAPK signaling pathway - yeast | ko04390; Environmental Information Processing; Signal transduction; Hippo signaling pathway | ko04391; Environmental Information Processing; Signal transduction; Hippo signaling pathway - fly | ko04151; Environmental Information Processing; Sig…	{At4g09000; KOG0841 Multifunctional chaperone (14-3-3 family) O Posttranslational modification, protein turnover, chaperones ;}	{NA}	{XM_003615112.2; Medicago truncatula general regulatory factor 2 mRNA}	{NA}
i0_HQ_c120726/f4p1/926	{XP_003616567.2; Fcf2 pre-rRNA processing protein [Medicago truncatula]}	{sp|O42877|FCF2_SCHPO; rRNA-processing protein fcf2 OS=Schizosaccharomyces pombe (strain 972 / ATCC 24843) GN=fcf2 PE=3 SV=1}	{cam:101491816; - - - - -}	{At1g54770; KOG3100 Uncharacterized conserved protein S Function unknown ;}	{NA}	{XM_003616519.2; Medicago truncatula Fcf2 pre-rRNA processing protein mRNA}	{NA}
i0_HQ_c120727/f50p13/812	{XP_013469077.1; plant/F25P12-18 protein [Medicago truncatula]}	{NA}	{cam:101504472; - - - - -}	{NA}	{NA}	{XM_013613623.1; Medicago truncatula plant/F25P12-18 protein mRNA}	{NA}
i0_HQ_c120728/f14p3/949	{GAU24766.1; hypothetical protein TSUD_355950 [Trifolium subterraneum]}	{sp|P15490|VSPA_SOYBN; Stem 28 kDa glycoprotein OS=Glycine max GN=VSPA PE=2 SV=1}	{mtr:MTR_8g014640; - - - - -}	{NA}	{GO:0003993; acid phosphatase activity; molecular_function}	{XM_003627010.2; Medicago truncatula stem 28 kDa glycoprotein mRNA}	{PF03767:HAD superfamily, subfamily IIIB (Acid phosphatase)}
i0_HQ_c120736/f2p10/837	{GAU25096.1; hypothetical protein TSUD_257900 [Trifolium subterraneum]}	{sp|Q9FJ62|GPDL4_ARATH; Glycerophosphodiester phosphodiesterase GDPDL4 OS=Arabidopsis thaliana GN=GDPDL4 PE=1 SV=1}	{cam:101493383; - - - - -}	{At5g55480; KOG2258 Glycerophosphoryl diester phosphodiesterase C Energy production and conversion ;}	{NA}	{XM_003617628.2; Medicago truncatula glycerophosphoryl diester phosphodiesterase family protein mRNA}	{NA}
i0_HQ_c120740/f4p3/623	{GAU44630.1; hypothetical protein TSUD_379090 [Trifolium subterraneum]}	{sp|Q8S9J6|ASPA_ARATH; Aspartyl protease family protein At5g10770 OS=Arabidopsis thaliana GN=At5g10770 PE=2 SV=1}	{cam:101507848; - - - - -}	{At5g10770; KOG1339 Aspartyl protease O Posttranslational modification, protein turnover, chaperones ;}	{GO:0004190; aspartic-type endopeptidase activity; molecular_function GO:0006508; proteolysis; biological_process}	{XM_003594351.1; Medicago truncatula eukaryotic aspartyl protease family protein mRNA}	{PF00026:Eukaryotic aspartyl protease}
i0_HQ_c120741/f7p4/441	{EOY03461.1; Uncharacterized protein TCM_018553 [Theobroma cacao]}	{NA}	{lja:Lj0g3v0234239.1; - - - - -}	{NA}	{NA}	{XM_003621169.2; Medicago truncatula gibberellin-regulated family protein mRNA}	{NA}
i0_HQ_c120742/f3p1/898	{XP_013466563.1; 1-aminocyclopropane-1-carboxylate oxidase-like protein [Medicago truncatula]}	{sp|Q94A78|ACCH4_ARATH; 1-aminocyclopropane-1-carboxylate oxidase homolog 4 OS=Arabidopsis thaliana GN=At1g03400 PE=2 SV=1}	{lja:Lj0g3v0205419.1; - - - - -}	{At1g03400; KOG0143 Iron/ascorbate family oxidoreductases QR Secondary metabolites biosynthesis, transport and catabolism ; General function prediction only ;}	{GO:0016491; oxidoreductase activity; molecular_function GO:0055114; oxidation-reduction process; biological_process GO:0016706; oxidoreductase activity, acting on paired donors, with incorporation or reduction of molecular oxygen, 2-oxoglutarate as one donor, and incorporation of one atom each of oxygen into both donors; molecular_function}	{XM_013611109.1; Medicago truncatula 1-aminocyclopropane-1-carboxylate oxidase-like protein mRNA}	{PF03171:2OG-Fe(II) oxygenase superfamily}
i0_HQ_c120746/f6p0/444	{XP_003609759.1; hypothetical protein MTR_4g121930 [Medicago truncatula]}	{NA}	{lang:109363169; - - - - -; lang:109363169; - - - - -}	{NA}	{NA}	{AC126780.18; Medicago truncatula chromosome 8 clone mth2-10n4, complete sequence}	{NA}
i0_HQ_c120747/f2p0/607	{GAU30834.1; hypothetical protein TSUD_267540 [Trifolium subterraneum]}	{sp|O23758|NLTP_CICAR; Non-specific lipid-transfer protein OS=Cicer arietinum PE=3 SV=1}	{pvu:PHAVU_010G066400g; - - - - -}	{NA}	{NA}	{BT051321.1; Medicago truncatula clone MTYF1_F2_F3_F41G-H-6 unknown mRNA}	{NA}
i0_HQ_c120749/f5p3/405	{NA}	{NA}	{NA}	{NA}	{NA}	{NA}	{NA}
i0_HQ_c120750/f5p5/733	{XP_003604373.1; post-illumination chlorophyll fluorescence increase [Medicago truncatula]}	{NA}	{lang:109348994; - - - - -; lang:109348994; - - - - -}	{NA}	{NA}	{BT052481.1; Medicago truncatula clone MTYFD_FE_FF_FG1G-A-6 unknown mRNA}	{NA}
i0_HQ_c120753/f10p0/915	{XP_003597841.1; cytochrome C oxidase subunit 5b [Medicago truncatula]}	{sp|Q9SSB8|CX5B2_ARATH; Cytochrome c oxidase subunit 5b-2, mitochondrial OS=Arabidopsis thaliana GN=COX5B-2 PE=2 SV=1}	{cam:101495040; K02265 COX5B cytochrome c oxidase subunit 5b - ko00190; Metabolism; Energy metabolism; Oxidative phosphorylation | ko04260; Organismal Systems; Circulatory system; Cardiac muscle contraction | ko05010; Human Diseases; Neurodegenerative diseases; Alzheimer's disease | ko05012; Human Diseases; Neurodegenerative diseases; Parkinson's disease | ko05016; Human Diseases; Neurodegenerati…	{At1g80230; KOG3352 Cytochrome c oxidase, subunit Vb/COX4 C Energy production and conversion ;}	{GO:0005740; mitochondrial envelope; cellular_component GO:0004129; cytochrome-c oxidase activity; molecular_function}	{XM_003597793.2; Medicago truncatula cytochrome C oxidase subunit 5b mRNA}	{PF01215:Cytochrome c oxidase subunit Vb}
i0_HQ_c120754/f8p3/918	{GAU12788.1; hypothetical protein TSUD_72740 [Trifolium subterraneum]}	{NA}	{mtr:MTR_8g107430; - - - - -}	{NA}	{NA}	{XM_003631082.2; Medicago truncatula transmembrane protein, putative mRNA}	{NA}
i0_HQ_c120756/f7p1/750	{GAU23433.1; hypothetical protein TSUD_331310 [Trifolium subterraneum]}	{sp|Q9SVM8|RBG2_ARATH; Glycine-rich RNA-binding protein 2, mitochondrial OS=Arabidopsis thaliana GN=RBG2 PE=1 SV=1}	{var:108318986; - - - - -}	{At4g13850; KOG0118 FOG: RRM domain R General function prediction only ;}	{GO:0003676; nucleic acid binding; molecular_function}	{FJ174688.1; Pisum sativum glycine-rich RNA-binding protein mRNA, complete cds}	{PF00076:RNA recognition motif. (a.k.a. RRM, RBD, or RNP domain)}
i0_HQ_c120758/f3p2/506	{GAU38157.1; hypothetical protein TSUD_263810 [Trifolium subterraneum]}	{sp|O26373|Y273_METTH; UPF0098 protein MTH_273 OS=Methanothermobacter thermautotrophicus (strain ATCC 29096 / DSM 1053 / JCM 10044 / NBRC 100330 / Delta H) GN=MTH_273 PE=3 SV=1}	{adu:107475330; K06910 K06910 uncharacterized protein - -}	{NA}	{NA}	{XM_004517173.2; PREDICTED: Cicer arietinum uncharacterized LOC101498067 (LOC101498067), mRNA}	{NA}
i0_HQ_c120760/f2p2/736	{GAU33354.1; hypothetical protein TSUD_166190 [Trifolium subterraneum]}	{sp|P37707|B2_DAUCA; B2 protein OS=Daucus carota PE=2 SV=1}	{cit:102608975; - - - - -}	{NA}	{NA}	{AJ491856.1; Pisum sativum mRNA for GDA2 protein (gda2 gene)}	{NA}
i0_HQ_c120761/f29p6/944	{GAU15533.1; hypothetical protein TSUD_45700 [Trifolium subterraneum]}	{sp|F6HDT7|MTND2_VITVI; 1,2-dihydroxy-3-keto-5-methylthiopentene dioxygenase 2 OS=Vitis vinifera GN=VIT_05s0020g04080 PE=3 SV=1}	{cam:101502127; K08967 mtnD, mtnZ, ADI1 1,2-dihydroxy-3-keto-5-methylthiopentene dioxygenase [EC:1.13.11.53 1.13.11.54] 1.13.11.53,1.13.11.54 ko00270; Metabolism; Amino acid metabolism; Cysteine and methionine metabolism}	{At2g26400; KOG2107 Uncharacterized conserved protein, contains double-stranded beta-helix domain S Function unknown ;}	{GO:0006355; regulation of transcription, DNA-dependent; biological_process GO:0055114; oxidation-reduction process; biological_process GO:0045735; NA GO:0010309; acireductone dioxygenase [iron(II)-requiring] activity; molecular_function}	{XM_004496617.2; PREDICTED: Cicer arietinum 1,2-dihydroxy-3-keto-5-methylthiopentene dioxygenase 2-like (LOC101502127), mRNA}	{PF03079:ARD/ARD' family PF00190:Cupin PF02311:AraC-like ligand binding domain}
i0_HQ_c120763/f6p7/722	{BAE71225.1; putative phosphoribosylformylglycinamidine cyclo-ligase precursor [Trifolium pratense]}	{sp|P52424|PUR5_VIGUN; Phosphoribosylformylglycinamidine cyclo-ligase, chloroplastic/mitochondrial OS=Vigna unguiculata GN=PUR5 PE=2 SV=1}	{lja:Lj0g3v0241679.2; K01933 purM phosphoribosylformylglycinamidine cyclo-ligase 6.3.3.1 ko00230; Metabolism; Nucleotide metabolism; Purine metabolism}	{At3g55010; KOG0237 Glycinamide ribonucleotide synthetase (GARS)/Aminoimidazole ribonucleotide synthetase (AIRS) F Nucleotide transport and metabolism ;}	{NA}	{AB236773.1; Trifolium pratense RNA for putative phosphoribosylformylglycinamidine cyclo-ligase precursor, complete cds, clone: C1586}	{NA}
i0_HQ_c120770/f6p1/891	{GAU22468.1; hypothetical protein TSUD_123550 [Trifolium subterraneum]}	{sp|Q940S5|COPZ1_ARATH; Coatomer subunit zeta-1 OS=Arabidopsis thaliana GN=At1g60970 PE=2 SV=1}	{cam:101513305; K20472 COPZ, RET3 coatomer subunit zeta - -}	{At1g60970; KOG3343 Vesicle coat complex COPI, zeta subunit U Intracellular trafficking, secretion, and vesicular transport ;}	{NA}	{XM_003594398.2; Medicago truncatula nonclathrin coat protein zeta1-COP partial mRNA}	{NA}
i0_HQ_c12078/f2p1/769	{GAU40975.1; hypothetical protein TSUD_300540 [Trifolium subterraneum]}	{NA}	{cit:102613538; - - - - -}	{NA}	{NA}	{CU468234.6; M.truncatula DNA sequence from clone MTH2-40I24 on chromosome 3, complete sequence}	{NA}
i0_HQ_c120781/f7p5/527	{XP_004499026.1; PREDICTED: cysteine proteinase RD21a [Cicer arietinum]}	{sp|P25776|ORYA_ORYSJ; Oryzain alpha chain OS=Oryza sativa subsp. japonica GN=Os04g0650000 PE=1 SV=2}	{lang:109337330; - - - - -; lang:109337330; - - - - -}	{At1g47128_2; KOG4296 Epithelin/granulin T Signal transduction mechanisms ;}	{NA}	{XM_003589085.2; Medicago truncatula papain family cysteine protease mRNA}	{NA}
i0_HQ_c120784/f15p3/755	{GAU29177.1; hypothetical protein TSUD_275960 [Trifolium subterraneum]}	{sp|Q2R0W8|SP1L2_ORYSJ; Protein SPIRAL1-like 2 OS=Oryza sativa subsp. japonica GN=Os11g0629400 PE=3 SV=1}	{cam:101512258; K18635 SPR1 protein SPIRAL1 and related proteins - -}	{NA}	{NA}	{BT148885.1; Medicago truncatula clone JCVI-FLMt-7L20 unknown mRNA}	{NA}
i0_HQ_c120787/f9p1/800	{GAU35218.1; hypothetical protein TSUD_204940 [Trifolium subterraneum]}	{sp|O64416|RBS_MARPA; Ribulose bisphosphate carboxylase small chain, chloroplastic OS=Marchantia paleacea GN=RBCS PE=2 SV=1}	{gra:105789073; K01602 rbcS ribulose-bisphosphate carboxylase small chain 4.1.1.39 ko01200; Metabolism; Global and overview maps; Carbon metabolism | ko00630; Metabolism; Carbohydrate metabolism; Glyoxylate and dicarboxylate metabolism | ko00710; Metabolism; Energy metabolism; Carbon fixation in photosynthetic organisms}	{NA}	{NA}	{XM_003610047.2; Medicago truncatula ribulose bisphosphate carboxylase small chain mRNA}	{NA}
i0_HQ_c120789/f6p5/455	{GAU32906.1; hypothetical protein TSUD_152660 [Trifolium subterraneum]}	{sp|O80852|GSTF9_ARATH; Glutathione S-transferase F9 OS=Arabidopsis thaliana GN=GSTF9 PE=1 SV=1}	{lang:109359364; K00799 GST, gst glutathione S-transferase 2.5.1.18 ko00480; Metabolism; Metabolism of other amino acids; Glutathione metabolism | ko00980; Metabolism; Xenobiotics biodegradation and metabolism; Metabolism of xenobiotics by cytochrome P450 | ko00982; Metabolism; Xenobiotics biodegradation and metabolism; Drug metabolism - cytochrome P450 | ko05204; Human Diseases; Cancers: Overvie…	{At2g30860; KOG0867 Glutathione S-transferase O Posttranslational modification, protein turnover, chaperones ;}	{NA}	{XM_004499913.2; PREDICTED: Cicer arietinum glutathione S-transferase F9-like (LOC101496329), mRNA}	{NA}
i0_HQ_c120791/f4p0/811	{GAU33847.1; hypothetical protein TSUD_393550 [Trifolium subterraneum]}	{sp|Q06931|ABR17_PEA; ABA-responsive protein ABR17 OS=Pisum sativum PE=2 SV=1}	{vra:106760214; - - - - -}	{NA}	{GO:0009607; response to biotic stimulus; biological_process GO:0006952; defense response; biological_process}	{AY059460.1; Trifolium repens cold responsive protein TRVSP mRNA, complete cds}	{PF00407:Pathogenesis-related protein Bet v I family}
i0_HQ_c120793/f12p5/869	{NA}	{NA}	{NA}	{NA}	{NA}	{NA}	{NA}
i0_HQ_c120802/f3p1/762	{XP_013452021.1; ribosomal protein S13P/S18e [Medicago truncatula]}	{sp|P34788|RS18_ARATH; 40S ribosomal protein S18 OS=Arabidopsis thaliana GN=RPS18A PE=1 SV=1}	{cam:101504654; K02964 RP-S18e, RPS18 small subunit ribosomal protein S18e - ko03010; Genetic Information Processing; Translation; Ribosome}	{At4g09800; KOG3311 Ribosomal protein S18 J Translation, ribosomal structure and biogenesis ;}	{GO:0005840; ribosome; cellular_component GO:0003735; structural constituent of ribosome; molecular_function GO:0005622; intracellular; cellular_component GO:0006412; translation; biological_process GO:0003723; RNA binding; molecular_function}	{XM_013596567.1; Medicago truncatula ribosomal protein S13P/S18e mRNA}	{PF00416:Ribosomal protein S13/S18}
i0_HQ_c120804/f5p3/668	{GAU27216.1; hypothetical protein TSUD_108070 [Trifolium subterraneum]}	{sp|Q2HU65|H2A2_MEDTR; Probable histone H2A.2 OS=Medicago truncatula GN=MtrDRAFT_AC149210g4v1 PE=3 SV=1}	{rcu:8286138; K11251 H2A histone H2A - ko05322; Human Diseases; Immune diseases; Systemic lupus erythematosus | ko05034; Human Diseases; Substance dependence; Alcoholism}	{At5g02560; KOG1756 Histone 2A B Chromatin structure and dynamics ;}	{GO:0043565; sequence-specific DNA binding; molecular_function GO:0005622; intracellular; cellular_component GO:0003677; DNA binding; molecular_function}	{XM_003606959.2; Medicago truncatula core histone H2A/H2B/H3/H4 mRNA}	{PF00808:Histone-like transcription factor (CBF/NF-Y) and archaeal histone PF00125:Core histone H2A/H2B/H3/H4}
i0_HQ_c120805/f4p9/780	{CAA39759.1; petA, partial (chloroplast) [Pisum sativum]}	{sp|P06669|CYF_VICFA; Cytochrome f OS=Vicia faba GN=petA PE=3 SV=1}	{cann:107858750; - - - - -}	{NA}	{NA}	{KJ788284.1; Trifolium boissieri chloroplast, complete genome}	{NA}
i0_HQ_c120806/f6p14/444	{NA}	{NA}	{NA}	{NA}	{NA}	{AB236764.1; Trifolium pratense RNA for putative NAD dependent epimerase, complete cds, clone: C1556}	{NA}
i0_HQ_c120807/f18p1/322	{ACJ83927.1; unknown, partial [Medicago truncatula]}	{NA}	{NA}	{NA}	{NA}	{XM_004512873.1; PREDICTED: Cicer arietinum NADH dehydrogenase [ubiquinone] 1 beta subcomplex subunit 10-B (LOC101502099), mRNA}	{NA}
i0_HQ_c120809/f14p4/651	{GAU46862.1; hypothetical protein TSUD_385390 [Trifolium subterraneum]}	{sp|P82244|RK34_SPIOL; 50S ribosomal protein L34, chloroplastic OS=Spinacia oleracea GN=RPL34 PE=1 SV=1}	{cam:101499293; K02914 RP-L34, MRPL34, rpmH large subunit ribosomal protein L34 - ko03010; Genetic Information Processing; Translation; Ribosome}	{NA}	{GO:0003735; structural constituent of ribosome; molecular_function GO:0005622; intracellular; cellular_component GO:0006412; translation; biological_process GO:0005840; ribosome; cellular_component}	{XM_003593710.2; Medicago truncatula ribosomal protein L34 mRNA}	{PF00468:Ribosomal protein L34}
i0_HQ_c12081/f2p1/1006	{GAU26049.1; hypothetical protein TSUD_225110 [Trifolium subterraneum]}	{sp|O23193|CBSX1_ARATH; CBS domain-containing protein CBSX1, chloroplastic OS=Arabidopsis thaliana GN=CBSX1 PE=1 SV=2}	{gmx:100802500; - - - - -}	{NA}	{GO:0030554; adenyl nucleotide binding; molecular_function}	{XM_004511843.2; PREDICTED: Cicer arietinum CBS domain-containing protein CBSX1, chloroplastic (LOC101511834), mRNA}	{PF00571:CBS domain}
i0_HQ_c120816/f4p3/872	{GAU27459.1; hypothetical protein TSUD_161450 [Trifolium subterraneum]}	{sp|O49595|HMGB1_ARATH; High mobility group B protein 1 OS=Arabidopsis thaliana GN=HMGB1 PE=1 SV=1}	{cam:101509802; K10802 HMGB1 high mobility group protein B1 - ko03410; Genetic Information Processing; Replication and repair; Base excision repair | ko04140; Cellular Processes; Transport and catabolism; Autophagy - animal}	{At3g51880; KOG0381 HMG box-containing protein R General function prediction only ;}	{NA}	{XM_003623245.2; Medicago truncatula high mobility group (HMG)-box protein mRNA}	{NA}
i0_HQ_c120822/f2p1/563	{GAU29912.1; hypothetical protein TSUD_148200 [Trifolium subterraneum]}	{NA}	{adu:107478917; - - - - -}	{NA}	{NA}	{XM_003601136.2; Medicago truncatula phloem specific protein mRNA}	{NA}
i0_HQ_c120825/f5p11/708	{XP_004486415.1; PREDICTED: endoglucanase 25 [Cicer arietinum]}	{sp|Q38890|GUN25_ARATH; Endoglucanase 25 OS=Arabidopsis thaliana GN=KOR PE=1 SV=1}	{cam:101510949; - - - - -}	{NA}	{GO:0005975; carbohydrate metabolic process; biological_process GO:0004553; hydrolase activity, hydrolyzing O-glycosyl compounds; molecular_function}	{XM_003594377.2; Medicago truncatula membrane-anchored endo-1,4-beta-glucanase mRNA}	{PF00759:Glycosyl hydrolase family 9}
i0_HQ_c120829/f12p14/994	{GAU14994.1; hypothetical protein TSUD_47890 [Trifolium subterraneum]}	{sp|Q9XJ35|CLPR1_ARATH; ATP-dependent Clp protease proteolytic subunit-related protein 1, chloroplastic OS=Arabidopsis thaliana GN=CLPR1 PE=1 SV=1}	{cam:101491976; K01358 clpP, CLPP ATP-dependent Clp protease, protease subunit 3.4.21.92 ko04112; Cellular Processes; Cell growth and death; Cell cycle - Caulobacter | ko04212; Organismal Systems; Aging; Longevity regulating pathway - worm}	{At1g49970; KOG0840 ATP-dependent Clp protease, proteolytic subunit O Posttranslational modification, protein turnover, chaperones ;}	{NA}	{XM_003592441.2; Medicago truncatula ATP-dependent Clp protease proteolytic protein mRNA}	{NA}
i0_HQ_c120831/f6p3/432	{XP_002525379.1; PREDICTED: 2-methylene-furan-3-one reductase [Ricinus communis]}	{sp|Q9ZUC1|QORL_ARATH; Quinone oxidoreductase-like protein At1g23740, chloroplastic OS=Arabidopsis thaliana GN=At1g23740 PE=2 SV=2}	{mtr:MTR_8g064610; K18980 EO, FaQR 2-methylene-furan-3-one reductase 1.3.1.105 -}	{At1g23740; KOG1198 Zinc-binding oxidoreductase CR Energy production and conversion ; General function prediction only ;}	{NA}	{XM_013590530.1; Medicago truncatula zinc-binding dehydrogenase family oxidoreductase mRNA}	{NA}
i0_HQ_c120834/f7p3/580	{XP_003601110.1; 30S ribosomal protein S13 [Medicago truncatula]}	{sp|P42732|RR13_ARATH; 30S ribosomal protein S13, chloroplastic OS=Arabidopsis thaliana GN=RPS13 PE=2 SV=1}	{pvu:PHAVU_009G121100g; K02952 RP-S13, rpsM small subunit ribosomal protein S13 - ko03010; Genetic Information Processing; Translation; Ribosome}	{At5g14320; KOG3311 Ribosomal protein S18 J Translation, ribosomal structure and biogenesis ;}	{GO:0003723; RNA binding; molecular_function GO:0006412; translation; biological_process GO:0003735; structural constituent of ribosome; molecular_function GO:0005622; intracellular; cellular_component GO:0005840; ribosome; cellular_component}	{BT146439.1; Medicago truncatula clone JCVI-FLMt-7H13 unknown mRNA}	{PF00416:Ribosomal protein S13/S18}
i0_HQ_c120836/f21p3/903	{XP_003616097.1; cystathionine beta-synthase (CBS) family protein [Medicago truncatula]}	{sp|Q9LEV3|CBSX3_ARATH; CBS domain-containing protein CBSX3, mitochondrial OS=Arabidopsis thaliana GN=CBSX3 PE=1 SV=1}	{cam:101501243; - - - - -}	{NA}	{GO:0030554; adenyl nucleotide binding; molecular_function}	{BT052304.1; Medicago truncatula clone MTYF9_FA_FB_FC1G-A-21 unknown mRNA}	{PF00571:CBS domain}
i0_HQ_c120840/f3p6/689	{GAU21092.1; hypothetical protein TSUD_10090 [Trifolium subterraneum]}	{sp|Q08298|RD22_ARATH; BURP domain protein RD22 OS=Arabidopsis thaliana GN=RD22 PE=2 SV=1}	{mtr:MTR_0312s0030; - - - - -}	{NA}	{NA}	{XM_003588503.2; Medicago truncatula dehydration-responsive protein RD22 mRNA}	{NA}
i0_HQ_c120841/f6p4/506	{AFK34775.1; unknown [Lotus japonicus]}	{sp|Q39839|NDK1_SOYBN; Nucleoside diphosphate kinase 1 OS=Glycine max PE=2 SV=1}	{pvu:PHAVU_010G045400g; K00940 ndk, NME nucleoside-diphosphate kinase 2.7.4.6 ko00230; Metabolism; Nucleotide metabolism; Purine metabolism | ko00240; Metabolism; Nucleotide metabolism; Pyrimidine metabolism | ko04016; Environmental Information Processing; Signal transduction; MAPK signaling pathway - plant}	{At4g09320; KOG0888 Nucleoside diphosphate kinase F Nucleotide transport and metabolism ;}	{NA}	{XM_013588416.1; Medicago truncatula nucleoside diphosphate kinase-like protein mRNA}	{NA}
i0_HQ_c120848/f3p2/358	{NA}	{NA}	{NA}	{NA}	{NA}	{XM_004487103.2; PREDICTED: Cicer arietinum 14-3-3-like protein B (14-3-3), mRNA}	{NA}
i0_HQ_c120855/f2p8/315	{NA}	{NA}	{NA}	{NA}	{NA}	{XM_004485477.2; PREDICTED: Cicer arietinum actin-101-like (LOC101501090), mRNA}	{NA}
i0_HQ_c120861/f4p0/447	{GAU42909.1; hypothetical protein TSUD_86470 [Trifolium subterraneum]}	{NA}	{var:108319394; - - - - -}	{NA}	{NA}	{AF117607.1; Trifolium subterraneum putative hybrid proline-rich protein PRP1 (prp1) gene, partial cds}	{NA}
i0_HQ_c120863/f48p6/648	{XP_003589489.1; GASA/GAST/Snakin [Medicago truncatula]}	{sp|P46689|GASA1_ARATH; Gibberellin-regulated protein 1 OS=Arabidopsis thaliana GN=GASA1 PE=2 SV=2}	{lang:109340437; - - - - -; lang:109340437; - - - - -}	{NA}	{NA}	{BT144667.1; Medicago truncatula clone JCVI-FLMt-4A10 unknown mRNA}	{NA}
i0_HQ_c120864/f51p5/597	{XP_003612091.2; thioredoxin [Medicago truncatula]}	{sp|Q43636|TRXH_RICCO; Thioredoxin H-type OS=Ricinus communis PE=3 SV=1}	{pper:PRUPE_ppa013476mg; K03671 trxA thioredoxin 1 - ko04621; Organismal Systems; Immune system; NOD-like receptor signaling pathway | ko05418; Human Diseases; Cardiovascular diseases; Fluid shear stress and atherosclerosis}	{At3g51030; KOG0907 Thioredoxin O Posttranslational modification, protein turnover, chaperones ;}	{GO:0055114; oxidation-reduction process; biological_process GO:0016491; oxidoreductase activity; molecular_function GO:0016209; NA GO:0045454; cell redox homeostasis; biological_process}	{XM_003612043.2; Medicago truncatula thioredoxin mRNA}	{PF00085:Thioredoxin PF00578:AhpC/TSA family PF08534:Redoxin}
i0_HQ_c120868/f6p22/854	{GAU19585.1; hypothetical protein TSUD_303980 [Trifolium subterraneum]}	{sp|Q8L7V3|PMTQ_ARATH; Probable methyltransferase PMT26 OS=Arabidopsis thaliana GN=At5g64030 PE=2 SV=1}	{gmx:100777586; - - - - -}	{NA}	{GO:0016020; membrane; cellular_component GO:0008152; NA GO:0008168; methyltransferase activity; molecular_function GO:0006865; amino acid transport; biological_process}	{XM_004502899.2; PREDICTED: Cicer arietinum probable methyltransferase PMT26 (LOC101492102), mRNA}	{PF03141:Putative S-adenosyl-L-methionine-dependent methyltransferase PF08241:Methyltransferase domain PF01810:LysE type translocator}
i0_HQ_c120869/f5p3/608	{XP_003625491.1; oligosaccaryltransferase [Medicago truncatula]}	{sp|C7J4U3|OST4A_ORYSJ; Dolichyl-diphosphooligosaccharide--protein glycosyltransferase subunit 4A OS=Oryza sativa subsp. japonica GN=OST4A PE=3 SV=1}	{cam:101495853; - - - - -}	{NA}	{NA}	{XM_004493832.2; PREDICTED: Cicer arietinum dolichyl-diphosphooligosaccharide--protein glycosyltransferase subunit 4A (LOC101495853), mRNA}	{NA}
i0_HQ_c120871/f8p2/579	{XP_007218617.1; hypothetical protein PRUPE_ppa013547mg [Prunus persica]}	{sp|Q940X7|RBX1A_ARATH; RING-box protein 1a OS=Arabidopsis thaliana GN=RBX1A PE=1 SV=1}	{cmo:103498857; K03868 RBX1, ROC1 RING-box protein 1 - ko04141; Genetic Information Processing; Folding, sorting and degradation; Protein processing in endoplasmic reticulum | ko04120; Genetic Information Processing; Folding, sorting and degradation; Ubiquitin mediated proteolysis | ko03420; Genetic Information Processing; Replication and repair; Nucleotide excision repair | ko04310; Environmenta…	{Hs7657508; KOG2930 SCF ubiquitin ligase, Rbx1 component O Posttranslational modification, protein turnover, chaperones ;}	{GO:0005680; anaphase-promoting complex; cellular_component GO:0046872; metal ion binding; molecular_function GO:0008270; zinc ion binding; molecular_function GO:0004842; ubiquitin-protein ligase activity; molecular_function GO:0005515; protein binding; molecular_function}	{XM_004515020.2; PREDICTED: Cicer arietinum RING-box protein 1a (LOC101496300), mRNA}	{PF00097:Zinc finger, C3HC4 type (RING finger) PF12678:RING-H2 zinc finger domain PF12861:Anaphase-promoting complex subunit 11 RING-H2 finger PF13639:Ring finger domain}
i0_HQ_c120873/f2p72/506	{XP_003596186.1; translation elongation factor EF-2 subunit [Medicago truncatula]}	{sp|Q9ASR1|EF2_ARATH; Elongation factor 2 OS=Arabidopsis thaliana GN=LOS1 PE=1 SV=1}	{cam:101493895; K03234 EEF2 elongation factor 2 - ko04152; Environmental Information Processing; Signal transduction; AMPK signaling pathway | ko04921; Organismal Systems; Endocrine system; Oxytocin signaling pathway}	{At1g56075; KOG0469 Elongation factor 2 J Translation, ribosomal structure and biogenesis ;}	{NA}	{XM_004488753.2; PREDICTED: Cicer arietinum elongation factor 2 (LOC101493895), mRNA}	{NA}
i0_HQ_c120884/f10p1/589	{GAU13696.1; hypothetical protein TSUD_348000 [Trifolium subterraneum]}	{NA}	{cam:101494887; - - - - -}	{NA}	{NA}	{XM_004494802.2; PREDICTED: Cicer arietinum uncharacterized LOC101494887 (LOC101494887), mRNA}	{NA}
i0_HQ_c120885/f17p5/834	{GAU33308.1; hypothetical protein TSUD_165730 [Trifolium subterraneum]}	{sp|P41127|RL131_ARATH; 60S ribosomal protein L13-1 OS=Arabidopsis thaliana GN=RPL13B PE=1 SV=1}	{gmx:100805957; K02873 RP-L13e, RPL13 large subunit ribosomal protein L13e - ko03010; Genetic Information Processing; Translation; Ribosome}	{At3g49010; KOG3295 60S Ribosomal protein L13 J Translation, ribosomal structure and biogenesis ;}	{GO:0005506; iron ion binding; molecular_function GO:0055114; oxidation-reduction process; biological_process GO:0006412; translation; biological_process GO:0003735; structural constituent of ribosome; molecular_function GO:0005622; intracellular; cellular_component GO:0005840; ribosome; cellular_component GO:0000334; 3-hydroxyanthranilate 3,4-dioxygenase activity; molecular_function}	{XM_003626102.2; Medicago truncatula 60S ribosomal L13-like protein mRNA}	{PF01294:Ribosomal protein L13e PF06052:3-hydroxyanthranilic acid dioxygenase}
i0_HQ_c12089/f4p4/882	{GAU15433.1; hypothetical protein TSUD_44700 [Trifolium subterraneum]}	{sp|P93788|REMO_SOLTU; Remorin OS=Solanum tuberosum PE=1 SV=1}	{cam:101501168; - - - - -}	{NA}	{GO:0006886; intracellular protein transport; biological_process GO:0005783; endoplasmic reticulum; cellular_component GO:0016021; integral to membrane; cellular_component}	{XM_013614225.1; Medicago truncatula carboxy-terminal region remorin mRNA}	{PF05529:B-cell receptor-associated protein 31-like }
i0_HQ_c120896/f6p15/911	{XP_003608875.1; glyceraldehyde-3-phosphate dehydrogenase [Medicago truncatula]}	{sp|P34922|G3PC_PEA; Glyceraldehyde-3-phosphate dehydrogenase, cytosolic OS=Pisum sativum GN=GAPC1 PE=2 SV=1}	{adu:107478858; K00134 GAPDH, gapA glyceraldehyde 3-phosphate dehydrogenase 1.2.1.12 ko01200; Metabolism; Global and overview maps; Carbon metabolism | ko01230; Metabolism; Global and overview maps; Biosynthesis of amino acids | ko00010; Metabolism; Carbohydrate metabolism; Glycolysis / Gluconeogenesis | ko00710; Metabolism; Energy metabolism; Carbon fixation in photosynthetic organisms | ko04066…	{At3g04120; KOG0657 Glyceraldehyde 3-phosphate dehydrogenase G Carbohydrate transport and metabolism ;}	{GO:0016620; oxidoreductase activity, acting on the aldehyde or oxo group of donors, NAD or NADP as acceptor; molecular_function GO:0055114; oxidation-reduction process; biological_process}	{XM_003608827.2; Medicago truncatula glyceraldehyde-3-phosphate dehydrogenase mRNA}	{PF02800:Glyceraldehyde 3-phosphate dehydrogenase, C-terminal domain PF00044:Glyceraldehyde 3-phosphate dehydrogenase, NAD binding domain}
i0_HQ_c1209/f2p3/631	{GAU34541.1; hypothetical protein TSUD_219240 [Trifolium subterraneum]}	{sp|Q9LE54|SP1L2_ARATH; Protein SPIRAL1-like 2 OS=Arabidopsis thaliana GN=SP1L2 PE=2 SV=1}	{cam:101491188; K18635 SPR1 protein SPIRAL1 and related proteins - -}	{NA}	{NA}	{XM_013598379.1; Medicago truncatula hypothetical protein mRNA}	{NA}
i0_HQ_c12090/f2p0/991	{ACF78974.1; unknown [Zea mays]}	{sp|O14405|GUN4_HYPJE; Endoglucanase-4 OS=Hypocrea jecorina GN=cel61a PE=1 SV=1}	{NA}	{NA}	{NA}	{NA}	{NA}
i0_HQ_c120905/f4p1/550	{XP_013449749.1; transmembrane protein, putative [Medicago truncatula]}	{NA}	{cam:101509912; - - - - -}	{NA}	{NA}	{XM_013594295.1; Medicago truncatula transmembrane protein, putative mRNA}	{NA}
i0_HQ_c120906/f7p2/593	{XP_003614315.1; B-cell receptor-associated-like protein [Medicago truncatula]}	{NA}	{var:108344748; - - - - -}	{NA}	{GO:0006886; intracellular protein transport; biological_process GO:0016021; integral to membrane; cellular_component GO:0005783; endoplasmic reticulum; cellular_component}	{XM_003619839.2; Medicago truncatula B-cell receptor-associated-like protein mRNA}	{PF05529:B-cell receptor-associated protein 31-like }
i0_HQ_c120911/f15p2/937	{GAU49547.1; hypothetical protein TSUD_50760 [Trifolium subterraneum]}	{sp|Q9SIP7|RS31_ARATH; 40S ribosomal protein S3-1 OS=Arabidopsis thaliana GN=RPS3A PE=1 SV=1}	{var:108343761; K02985 RP-S3e, RPS3 small subunit ribosomal protein S3e - ko03010; Genetic Information Processing; Translation; Ribosome}	{At2g31610; KOG3181 40S ribosomal protein S3 J Translation, ribosomal structure and biogenesis ;}	{GO:0005840; ribosome; cellular_component GO:0003723; RNA binding; molecular_function GO:0006412; translation; biological_process GO:0003735; structural constituent of ribosome; molecular_function}	{XM_004497065.2; PREDICTED: Cicer arietinum 40S ribosomal protein S3-2-like (LOC101508129), mRNA}	{PF07650:KH domain PF00189:Ribosomal protein S3, C-terminal domain}
i0_HQ_c120913/f7p31/955	{GAU14904.1; hypothetical protein TSUD_46970 [Trifolium subterraneum]}	{sp|F6H7K5|THI42_VITVI; Thiamine thiazole synthase 2, chloroplastic OS=Vitis vinifera GN=THI1-2 PE=3 SV=1}	{cam:101507074; K03146 THI4, THI1 thiamine thiazole synthase - ko00730; Metabolism; Metabolism of cofactors and vitamins; Thiamine metabolism}	{At5g54770; KOG2960 Protein involved in thiamine biosynthesis and DNA damage tolerance R General function prediction only ;}	{GO:0008033; tRNA processing; biological_process GO:0003899; DNA-directed RNA polymerase activity; molecular_function GO:0006351; transcription, DNA-dependent; biological_process GO:0055114; oxidation-reduction process; biological_process GO:0016117; carotenoid biosynthetic process; biological_process GO:0016705; oxidoreductase activity, acting on paired donors, with incorporation or reduction of…	{XM_013614428.1; Medicago truncatula thiazole biosynthetic enzyme mRNA}	{PF04983:RNA polymerase Rpb1, domain 3 PF00732:GMC oxidoreductase PF01266:FAD dependent oxidoreductase PF05834:Lycopene cyclase protein PF01134:Glucose inhibited division protein A PF07992:Pyridine nucleotide-disulphide oxidoreductase}
i0_HQ_c120914/f6p2/932	{GAU31461.1; hypothetical protein TSUD_72420 [Trifolium subterraneum]}	{sp|P17407|21KD_DAUCA; 21 kDa protein OS=Daucus carota PE=2 SV=1}	{mtr:MTR_8g104765; - - - - -}	{NA}	{GO:0030599; pectinesterase activity; molecular_function GO:0004857; enzyme inhibitor activity; molecular_function}	{XM_013591902.1; Medicago truncatula plant invertase/pectin methylesterase inhibitor mRNA}	{PF04043:Plant invertase/pectin methylesterase inhibitor}
i0_HQ_c120915/f5p0/490	{GAU29520.1; hypothetical protein TSUD_115420 [Trifolium subterraneum]}	{NA}	{NA}	{NA}	{NA}	{XM_013597845.1; Medicago truncatula transmembrane protein, putative mRNA}	{NA}
i0_HQ_c120918/f7p3/385	{GAU47649.1; hypothetical protein TSUD_27730 [Trifolium subterraneum]}	{sp|Q9SII5|EXOL5_ARATH; Protein EXORDIUM-like 5 OS=Arabidopsis thaliana GN=EXL5 PE=2 SV=1}	{cam:101515418; - - - - -}	{NA}	{NA}	{XM_013613309.1; Medicago truncatula phosphate-responsive 1 family protein mRNA}	{NA}
i0_HQ_c120923/f4p6/558	{XP_003589489.1; GASA/GAST/Snakin [Medicago truncatula]}	{sp|P46689|GASA1_ARATH; Gibberellin-regulated protein 1 OS=Arabidopsis thaliana GN=GASA1 PE=2 SV=2}	{lang:109340437; - - - - -; lang:109340437; - - - - -}	{NA}	{NA}	{BT144667.1; Medicago truncatula clone JCVI-FLMt-4A10 unknown mRNA}	{NA}
i0_HQ_c120925/f10p1/652	{GAU48855.1; hypothetical protein TSUD_188400 [Trifolium subterraneum]}	{sp|Q9SIE7|PLAT2_ARATH; PLAT domain-containing protein 2 OS=Arabidopsis thaliana GN=PLAT2 PE=2 SV=1}	{lang:109361286; - - - - -; lang:109361286; - - - - -}	{NA}	{GO:0005515; protein binding; molecular_function}	{XM_003601931.2; Medicago truncatula PLAT-plant-stress protein mRNA}	{PF01477:PLAT/LH2 domain}
i0_HQ_c120928/f8p2/427	{GAU12141.1; hypothetical protein TSUD_01070 [Trifolium subterraneum]}	{sp|O80626|RL352_ARATH; 60S ribosomal protein L35-2 OS=Arabidopsis thaliana GN=RPL35B PE=2 SV=1}	{cam:101498169; K02918 RP-L35e, RPL35 large subunit ribosomal protein L35e - ko03010; Genetic Information Processing; Translation; Ribosome}	{At3g09500; KOG3436 60S ribosomal protein L35 J Translation, ribosomal structure and biogenesis ;}	{NA}	{XM_004497260.1; PREDICTED: Cicer arietinum 60S ribosomal protein L35 (LOC101498169), mRNA}	{NA}
i0_HQ_c120929/f6p0/557	{GAU14287.1; hypothetical protein TSUD_308470 [Trifolium subterraneum]}	{sp|P11892|PSRP6_PEA; 50S ribosomal protein 6, chloroplastic OS=Pisum sativum GN=PSRP6 PE=3 SV=1}	{vra:106760376; K19035 PSRP6 50S ribosomal protein 6 - -}	{NA}	{NA}	{XM_003603615.2; Medicago truncatula 50S ribosomal protein mRNA}	{NA}
i0_HQ_c12093/f3p1/760	{GAU41983.1; hypothetical protein TSUD_306890 [Trifolium subterraneum]}	{NA}	{gmx:102661561; - - - - -}	{NA}	{NA}	{NA}	{NA}
i0_HQ_c120934/f2p3/691	{GAU50704.1; hypothetical protein TSUD_301090 [Trifolium subterraneum]}	{sp|A0AT33|NLTP4_LENCU; Non-specific lipid-transfer protein 4 (Fragment) OS=Lens culinaris PE=1 SV=1}	{pvu:PHAVU_010G069100g; - - - - -}	{NA}	{NA}	{XM_013599737.1; Medicago truncatula Lipid transfer protein partial mRNA}	{NA}
i0_HQ_c120939/f4p2/757	{XP_003620172.1; Kunitz type trypsin inhibitor / miraculin [Medicago truncatula]}	{sp|Q9LMU2|KTI2_ARATH; Kunitz trypsin inhibitor 2 OS=Arabidopsis thaliana GN=KTI2 PE=2 SV=1}	{vra:106766988; - - - - -}	{NA}	{GO:0004866; endopeptidase inhibitor activity; molecular_function}	{XM_003620124.2; Medicago truncatula Kunitz type trypsin inhibitor / miraculin mRNA}	{PF00197:Trypsin and protease inhibitor}
i0_HQ_c120945/f59p3/849	{GAU18762.1; hypothetical protein TSUD_80510, partial [Trifolium subterraneum]}	{sp|Q9FVI2|ADF1_PETHY; Actin-depolymerizing factor 1 OS=Petunia hybrida GN=ADF1 PE=2 SV=1}	{cam:101512978; K05765 CFL cofilin - ko04810; Cellular Processes; Cell motility; Regulation of actin cytoskeleton | ko04666; Organismal Systems; Immune system; Fc gamma R-mediated phagocytosis | ko04360; Organismal Systems; Development; Axon guidance | ko05133; Human Diseases; Infectious diseases: Bacterial; Pertussis}	{At3g46010; KOG1735 Actin depolymerizing factor Z Cytoskeleton ;}	{GO:0005622; intracellular; cellular_component GO:0003779; actin binding; molecular_function}	{XM_003629859.2; Medicago truncatula cofilin/actin-depolymerizing factor-like protein mRNA}	{PF00241:Cofilin/tropomyosin-type actin-binding protein}
i0_HQ_c12095/f2p0/808	{XP_004514567.1; PREDICTED: uncharacterized protein LOC101500633 isoform X4 [Cicer arietinum]}	{NA}	{nnu:104591516; K11364 SGF29 SAGA-associated factor 29 - -}	{At5g40550; KOG3038 Histone acetyltransferase SAGA associated factor SGF29 R General function prediction only ;}	{NA}	{XM_013592626.1; Medicago truncatula SGF29 tudor-like domain protein mRNA}	{NA}
i0_HQ_c120956/f7p0/751	{XP_003607890.1; glycine cleavage system H protein [Medicago truncatula]}	{sp|O82179|GCSH2_ARATH; Glycine cleavage system H protein 2, mitochondrial OS=Arabidopsis thaliana GN=GDH2 PE=2 SV=1}	{lang:109341397; K02437 gcvH, GCSH glycine cleavage system H protein - ko00630; Metabolism; Carbohydrate metabolism; Glyoxylate and dicarboxylate metabolism | ko00260; Metabolism; Amino acid metabolism; Glycine, serine and threonine metabolism; lang:109341397; - - - - -}	{At2g35120; KOG3373 Glycine cleavage system H protein (lipoate-binding) E Amino acid transport and metabolism ;}	{GO:0006546; glycine catabolic process; biological_process GO:0005960; glycine cleavage complex; cellular_component}	{XM_003607842.2; Medicago truncatula glycine cleavage system H protein mRNA}	{PF01597:Glycine cleavage H-protein}
i0_HQ_c120959/f3p13/891	{KHN33491.1; Actin-101 [Glycine soja]}	{sp|P30173|ACT13_SOLTU; Actin-101 OS=Solanum tuberosum GN=AC101 PE=3 SV=1}	{cam:101501090; K10355 ACTF actin, other eukaryote - -}	{At5g09810; KOG0676 Actin and related proteins Z Cytoskeleton ;}	{NA}	{XM_004485477.2; PREDICTED: Cicer arietinum actin-101-like (LOC101501090), mRNA}	{NA}
i0_HQ_c120961/f3p10/825	{NP_001265911.1; protein PHLOEM PROTEIN 2-LIKE A9-like [Cicer arietinum]}	{sp|Q9SA16|P2A09_ARATH; Protein PHLOEM PROTEIN 2-LIKE A9 OS=Arabidopsis thaliana GN=PP2A9 PE=2 SV=1}	{mtr:MTR_0026s0010; - - - - -}	{NA}	{NA}	{XM_013587805.1; Medicago truncatula phloem protein mRNA}	{NA}
i0_HQ_c120965/f3p7/497	{GAU23902.1; hypothetical protein TSUD_35720 [Trifolium subterraneum]}	{sp|Q41651|CYPB_VICFA; Peptidyl-prolyl cis-trans isomerase, chloroplastic OS=Vicia faba PE=1 SV=1}	{mtr:MTR_7g110980; K03768 PPIB, ppiB peptidyl-prolyl cis-trans isomerase B (cyclophilin B) 5.2.1.8 -}	{At3g62030; KOG0880 Peptidyl-prolyl cis-trans isomerase O Posttranslational modification, protein turnover, chaperones ;}	{NA}	{L32095.1; Vicia faba cyclophilin mRNA, complete cds}	{NA}
i0_HQ_c12097/f4p2/556	{GAU50072.1; hypothetical protein TSUD_90950 [Trifolium subterraneum]}	{sp|P33080|AX10A_SOYBN; Auxin-induced protein X10A OS=Glycine max PE=2 SV=1}	{lja:Lj0g3v0040089.1; - - - - -}	{NA}	{NA}	{XM_003607110.1; Medicago truncatula SAUR-like auxin-responsive family protein mRNA}	{NA}
i0_HQ_c120971/f4p1/450	{GAU43332.1; hypothetical protein TSUD_398770 [Trifolium subterraneum]}	{sp|Q9FYK2|CML25_ARATH; Probable calcium-binding protein CML25 OS=Arabidopsis thaliana GN=CML25 PE=2 SV=1}	{lja:Lj0g3v0006589.1; - - - - -}	{At1g24620; KOG0027 Calmodulin and related proteins (EF-Hand superfamily) T Signal transduction mechanisms ;}	{GO:0007165; signal transduction; biological_process GO:0005509; calcium ion binding; molecular_function GO:0005578; proteinaceous extracellular matrix; cellular_component}	{XM_003612571.2; Medicago truncatula calcium-binding EF-hand protein mRNA}	{PF00036:EF hand PF13202:EF hand PF13405:EF-hand domain PF10591:Secreted protein acidic and rich in cysteine Ca binding region PF13499:EF-hand domain pair}
i0_HQ_c120972/f6p4/539	{GAU21913.1; hypothetical protein TSUD_34100 [Trifolium subterraneum]}	{sp|P29062|PR4A_TOBAC; Pathogenesis-related protein PR-4A OS=Nicotiana tabacum PE=2 SV=1}	{cam:101499251; - - - - -}	{At3g04720; KOG4742 Predicted chitinase R General function prediction only ;}	{GO:0042742; defense response to bacterium; biological_process GO:0050832; defense response to fungus; biological_process}	{XM_013613520.1; Medicago truncatula Chitinase / Hevein / PR-4 / Wheatwin2 mRNA}	{PF00967:Barwin family}
i0_HQ_c120974/f11p139/1004	{XP_004488810.1; PREDICTED: elongation factor 2 [Cicer arietinum]}	{sp|O23755|EF2_BETVU; Elongation factor 2 OS=Beta vulgaris PE=2 SV=1}	{cam:101493895; K03234 EEF2 elongation factor 2 - ko04152; Environmental Information Processing; Signal transduction; AMPK signaling pathway | ko04921; Organismal Systems; Endocrine system; Oxytocin signaling pathway}	{At1g56075; KOG0469 Elongation factor 2 J Translation, ribosomal structure and biogenesis ;}	{GO:0005525; GTP binding; molecular_function}	{XM_013611802.1; Medicago truncatula translation elongation factor EF-2 subunit mRNA}	{PF03764:Elongation factor G, domain IV}
i0_HQ_c120975/f6p2/735	{GAU41526.1; hypothetical protein TSUD_140570 [Trifolium subterraneum]}	{NA}	{vra:106758158; - - - - -}	{NA}	{NA}	{XM_004512897.2; PREDICTED: Cicer arietinum uncharacterized LOC101509903 (LOC101509903), transcript variant X1, mRNA}	{NA}
i0_HQ_c120976/f4p3/687	{GAU11402.1; hypothetical protein TSUD_343930 [Trifolium subterraneum]}	{sp|Q0DKW8|LTI6B_ORYSJ; Hydrophobic protein LTI6B OS=Oryza sativa subsp. japonica GN=LTI6B PE=2 SV=1}	{cam:101498830; - - - - -}	{At3g05890; KOG1773 Stress responsive protein R General function prediction only ;}	{NA}	{XM_004494449.2; PREDICTED: Cicer arietinum hydrophobic protein LTI6B-like (LOC101498830), mRNA}	{NA}
i0_HQ_c120980/f46p2/599	{XP_003620866.1; 60S ribosomal protein L31B [Medicago truncatula]}	{sp|Q9M573|RL31_PERFR; 60S ribosomal protein L31 OS=Perilla frutescens GN=RPL31 PE=2 SV=1}	{mtr:MTR_8g101980; K02910 RP-L31e, RPL31 large subunit ribosomal protein L31e - ko03010; Genetic Information Processing; Translation; Ribosome}	{At2g19740; KOG0893 60S ribosomal protein L31 J Translation, ribosomal structure and biogenesis ;}	{GO:0003735; structural constituent of ribosome; molecular_function GO:0005622; intracellular; cellular_component GO:0004519; endonuclease activity; molecular_function GO:0006412; translation; biological_process GO:0005840; ribosome; cellular_component GO:0006298; mismatch repair; biological_process}	{XM_003620818.1; Medicago truncatula 60S ribosomal protein L31B mRNA}	{PF01198:Ribosomal protein L31e PF03852:DNA mismatch endonuclease Vsr}
i0_HQ_c120981/f3p0/980	{XP_013457023.1; pollen Ole e I family allergen [Medicago truncatula]}	{sp|P93013|AGP30_ARATH; Non-classical arabinogalactan protein 30 OS=Arabidopsis thaliana GN=AGP30 PE=2 SV=1}	{var:108319394; - - - - -}	{NA}	{NA}	{AF117607.1; Trifolium subterraneum putative hybrid proline-rich protein PRP1 (prp1) gene, partial cds}	{NA}
i0_HQ_c120985/f4p6/956	{XP_004507459.1; PREDICTED: protein RER1A-like [Cicer arietinum]}	{sp|O48670|RER1A_ARATH; Protein RER1A OS=Arabidopsis thaliana GN=RER1A PE=1 SV=1}	{aip:107628875; - - - - -}	{At4g39220; KOG1688 Golgi proteins involved in ER retention (RER) U Intracellular trafficking, secretion, and vesicular transport ;}	{GO:0016021; integral to membrane; cellular_component}	{XM_004507402.2; PREDICTED: Cicer arietinum protein RER1A-like (LOC101509546), mRNA}	{PF03248:Rer1 family}
i0_HQ_c121001/f4p0/794	{XP_007225841.1; hypothetical protein PRUPE_ppa011659mg [Prunus persica]}	{sp|P34788|RS18_ARATH; 40S ribosomal protein S18 OS=Arabidopsis thaliana GN=RPS18A PE=1 SV=1}	{cam:101512073; K02964 RP-S18e, RPS18 small subunit ribosomal protein S18e - ko03010; Genetic Information Processing; Translation; Ribosome}	{At4g09800; KOG3311 Ribosomal protein S18 J Translation, ribosomal structure and biogenesis ;}	{GO:0005840; ribosome; cellular_component GO:0003735; structural constituent of ribosome; molecular_function GO:0005622; intracellular; cellular_component GO:0003723; RNA binding; molecular_function GO:0006412; translation; biological_process}	{XM_004496380.1; PREDICTED: Cicer arietinum 40S ribosomal protein S18-like (LOC101512073), mRNA}	{PF00416:Ribosomal protein S13/S18}
i0_HQ_c121007/f5p0/575	{AFK40803.1; unknown [Medicago truncatula]}	{NA}	{pvu:PHAVU_009G070200g; - - - - -}	{NA}	{NA}	{BT141009.1; Medicago truncatula clone JCVI-FLMt-5D9 unknown mRNA}	{NA}
i0_HQ_c121014/f6p5/792	{XP_013464059.1; elongation factor 1-beta [Medicago truncatula]}	{sp|Q9SI20|EF1D2_ARATH; Elongation factor 1-delta 2 OS=Arabidopsis thaliana GN=At2g18110 PE=1 SV=1}	{vra:106763890; K03232 EEF1B elongation factor 1-beta - -}	{At1g30230; KOG1668 Elongation factor 1 beta/delta chain K Transcription ;}	{GO:0005853; eukaryotic translation elongation factor 1 complex; cellular_component GO:0003746; translation elongation factor activity; molecular_function GO:0006414; translational elongation; biological_process}	{BT141762.1; Medicago truncatula clone JCVI-FLMt-5C7 unknown mRNA}	{PF00736:EF-1 guanine nucleotide exchange domain}
i0_HQ_c121024/f9p7/378	{GAU42466.1; hypothetical protein TSUD_235350 [Trifolium subterraneum]}	{sp|P27774|KPPR_MESCR; Phosphoribulokinase, chloroplastic OS=Mesembryanthemum crystallinum PE=2 SV=1}	{pop:POPTR_0003s09830g; K00855 PRK, prkB phosphoribulokinase 2.7.1.19 ko01200; Metabolism; Global and overview maps; Carbon metabolism | ko00710; Metabolism; Energy metabolism; Carbon fixation in photosynthetic organisms}	{At1g32060; KOG4203 Armadillo/beta-Catenin/plakoglobin TZ Signal transduction mechanisms ; Cytoskeleton ;}	{NA}	{XM_003612616.2; Medicago truncatula phosphoribulokinase mRNA}	{NA}
i0_HQ_c121031/f2p3/584	{GAU50331.1; hypothetical protein TSUD_243610 [Trifolium subterraneum]}	{sp|Q42064|RL83_ARATH; 60S ribosomal protein L8-3 OS=Arabidopsis thaliana GN=RPL8C PE=2 SV=2}	{var:108331195; K02938 RP-L8e, RPL8 large subunit ribosomal protein L8e - ko03010; Genetic Information Processing; Translation; Ribosome}	{At4g36130; KOG2309 60s ribosomal protein L2/L8 J Translation, ribosomal structure and biogenesis ;}	{GO:0003735; structural constituent of ribosome; molecular_function GO:0006412; translation; biological_process GO:0005840; ribosome; cellular_component}	{XM_003623864.2; Medicago truncatula 60S ribosomal L8-like protein mRNA}	{PF03947:Ribosomal Proteins L2, C-terminal domain}
i0_HQ_c121032/f19p32/837	{GAU15250.1; hypothetical protein TSUD_03170 [Trifolium subterraneum]}	{sp|P25804|CYSP_PEA; Cysteine proteinase 15A OS=Pisum sativum PE=2 SV=1}	{fve:101294426; K01373 CTSF cathepsin F 3.4.22.41 ko04142; Cellular Processes; Transport and catabolism; Lysosome | ko04210; Cellular Processes; Cell growth and death; Apoptosis}	{At4g39090; KOG1542 Cysteine proteinase Cathepsin F O Posttranslational modification, protein turnover, chaperones ;}	{GO:0004197; cysteine-type endopeptidase activity; molecular_function GO:0006508; proteolysis; biological_process GO:0008234; cysteine-type peptidase activity; molecular_function}	{XM_003589300.2; Medicago truncatula papain family cysteine protease mRNA}	{PF03051:Peptidase C1-like family PF00112:Papain family cysteine protease}
i0_HQ_c121033/f38p4/676	{XP_004500009.1; PREDICTED: peptidyl-prolyl cis-trans isomerase NIMA-interacting 4 [Cicer arietinum]}	{sp|A6QPY8|PIN4_BOVIN; Peptidyl-prolyl cis-trans isomerase NIMA-interacting 4 OS=Bos taurus GN=PIN4 PE=2 SV=1}	{pvu:PHAVU_009G185800g; K09579 PIN4 peptidyl-prolyl cis-trans isomerase NIMA-interacting 4 5.2.1.8 -}	{At1g26550; KOG3258 Parvulin-like peptidyl-prolyl cis-trans isomerase O Posttranslational modification, protein turnover, chaperones ;}	{GO:0016853; isomerase activity; molecular_function}	{XM_013603973.1; Medicago truncatula peptidylprolyl cis/trans isomerase, NIMA-interacting protein mRNA}	{PF00639:PPIC-type PPIASE domain PF13145:PPIC-type PPIASE domain}
i0_HQ_c121035/f53p4/604	{GAU17552.1; hypothetical protein TSUD_340960 [Trifolium subterraneum]}	{sp|Q9LMK0|R35A1_ARATH; 60S ribosomal protein L35a-1 OS=Arabidopsis thaliana GN=RPL35AA PE=3 SV=1}	{cam:101514440; K02917 RP-L35Ae, RPL35A large subunit ribosomal protein L35Ae - ko03010; Genetic Information Processing; Translation; Ribosome}	{At1g74270; KOG0887 60S ribosomal protein L35A/L37 J Translation, ribosomal structure and biogenesis ;}	{GO:0006364; rRNA processing; biological_process GO:0005840; ribosome; cellular_component GO:0006412; translation; biological_process GO:0005622; intracellular; cellular_component GO:0003735; structural constituent of ribosome; molecular_function}	{XM_004494231.2; PREDICTED: Cicer arietinum 60S ribosomal protein L35a-1-like (LOC101514440), mRNA}	{PF01247:Ribosomal protein L35Ae PF01782:RimM N-terminal domain}
i0_HQ_c121036/f11p5/833	{GAU16341.1; hypothetical protein TSUD_116900 [Trifolium subterraneum]}	{sp|P17407|21KD_DAUCA; 21 kDa protein OS=Daucus carota PE=2 SV=1}	{lja:Lj0g3v0070759.1; - - - - -}	{NA}	{GO:0030599; pectinesterase activity; molecular_function GO:0004857; enzyme inhibitor activity; molecular_function}	{XM_003598191.2; Medicago truncatula plant invertase/pectin methylesterase inhibitor mRNA}	{PF04043:Plant invertase/pectin methylesterase inhibitor}
i0_HQ_c121044/f4p4/346	{AFK41202.1; unknown [Medicago truncatula]}	{NA}	{NA}	{NA}	{NA}	{XM_004507102.2; PREDICTED: Cicer arietinum protein TIC 62, chloroplastic (LOC101513087), mRNA}	{NA}
i0_HQ_c121049/f20p6/963	{GAU19459.1; hypothetical protein TSUD_77030 [Trifolium subterraneum]}	{sp|O48646|GPX6_ARATH; Probable phospholipid hydroperoxide glutathione peroxidase 6, mitochondrial OS=Arabidopsis thaliana GN=GPX6 PE=2 SV=2}	{aip:107630800; K00432 gpx glutathione peroxidase 1.11.1.9 ko00590; Metabolism; Lipid metabolism; Arachidonic acid metabolism | ko00480; Metabolism; Metabolism of other amino acids; Glutathione metabolism | ko04918; Organismal Systems; Endocrine system; Thyroid hormone synthesis}	{At4g11600; KOG1651 Glutathione peroxidase O Posttranslational modification, protein turnover, chaperones ;}	{GO:0016209; NA GO:0006979; response to oxidative stress; biological_process GO:0016491; oxidoreductase activity; molecular_function GO:0004602; glutathione peroxidase activity; molecular_function GO:0055114; oxidation-reduction process; biological_process}	{XM_003630475.2; Medicago truncatula phospholipid hydroperoxide glutathione peroxidase mRNA}	{PF00578:AhpC/TSA family PF00255:Glutathione peroxidase PF08534:Redoxin}
i0_HQ_c121065/f14p5/931	{XP_004503771.1; PREDICTED: probable phospholipid hydroperoxide glutathione peroxidase [Cicer arietinum]}	{sp|O48646|GPX6_ARATH; Probable phospholipid hydroperoxide glutathione peroxidase 6, mitochondrial OS=Arabidopsis thaliana GN=GPX6 PE=2 SV=2}	{aip:107630800; K00432 gpx glutathione peroxidase 1.11.1.9 ko00590; Metabolism; Lipid metabolism; Arachidonic acid metabolism | ko00480; Metabolism; Metabolism of other amino acids; Glutathione metabolism | ko04918; Organismal Systems; Endocrine system; Thyroid hormone synthesis}	{At4g11600; KOG1651 Glutathione peroxidase O Posttranslational modification, protein turnover, chaperones ;}	{GO:0016209; NA GO:0055114; oxidation-reduction process; biological_process GO:0004602; glutathione peroxidase activity; molecular_function GO:0006979; response to oxidative stress; biological_process GO:0016491; oxidoreductase activity; molecular_function}	{XM_003630475.2; Medicago truncatula phospholipid hydroperoxide glutathione peroxidase mRNA}	{PF08534:Redoxin PF00578:AhpC/TSA family PF00255:Glutathione peroxidase}
i0_HQ_c121066/f3p4/956	{EPS74273.1; hypothetical protein M569_00483, partial [Genlisea aurea]}	{NA}	{NA}	{NA}	{NA}	{EU849487.1; Trifolium subterraneum chloroplast, complete genome}	{NA}
i0_HQ_c121077/f4p0/620	{XP_013455241.1; plant/F12K8-2 protein, putative [Medicago truncatula]}	{NA}	{thj:104809734; - - - - -}	{NA}	{NA}	{XM_013599787.1; Medicago truncatula plant/F12K8-2 protein, putative mRNA}	{NA}
i0_HQ_c121082/f6p0/388	{NP_001237174.1; uncharacterized protein LOC100306077 [Glycine max]}	{sp|P40590|RL34_PEA; 60S ribosomal protein L34 OS=Pisum sativum GN=RPL34 PE=2 SV=1}	{mtr:MTR_8g467460; K02915 RP-L34e, RPL34 large subunit ribosomal protein L34e - ko03010; Genetic Information Processing; Translation; Ribosome}	{At1g69620; KOG1790 60s ribosomal protein L34 J Translation, ribosomal structure and biogenesis ;}	{NA}	{XM_003613714.2; Medicago truncatula 60S ribosomal L34-like protein mRNA}	{NA}
i0_HQ_c121083/f12p0/873	{GAU33847.1; hypothetical protein TSUD_393550 [Trifolium subterraneum]}	{sp|Q06931|ABR17_PEA; ABA-responsive protein ABR17 OS=Pisum sativum PE=2 SV=1}	{vra:106760214; - - - - -}	{NA}	{GO:0009607; response to biotic stimulus; biological_process GO:0006952; defense response; biological_process}	{AY059460.1; Trifolium repens cold responsive protein TRVSP mRNA, complete cds}	{PF00407:Pathogenesis-related protein Bet v I family}
i0_HQ_c121086/f5p3/324	{NA}	{NA}	{NA}	{NA}	{NA}	{XM_012714507.1; PREDICTED: Cicer arietinum aspartic proteinase-like (LOC101500643), transcript variant X3, mRNA}	{NA}
i0_HQ_c121087/f4p11/555	{GAU12297.1; hypothetical protein TSUD_142060 [Trifolium subterraneum]}	{sp|Q2JLB2|EFTS_SYNJB; Elongation factor Ts OS=Synechococcus sp. (strain JA-2-3B'a(2-13)) GN=tsf PE=3 SV=1}	{vra:106770165; K02357 tsf, TSFM elongation factor Ts - -}	{At4g29060; KOG1071 Mitochondrial translation elongation factor EF-Tsmt, catalyzes nucleotide exchange on EF-Tumt J Translation, ribosomal structure and biogenesis ;}	{NA}	{XM_003620606.2; Medicago truncatula elongation factor Ts protein mRNA}	{NA}
i0_HQ_c121091/f2p8/944	{NA}	{NA}	{NA}	{NA}	{NA}	{XM_003613047.2; Medicago truncatula hypothetical protein mRNA}	{NA}
i0_HQ_c121092/f40p7/859	{ANO46329.1; ribosomal protein L15, partial [Trifolium repens]}	{sp|O23515|RL151_ARATH; 60S ribosomal protein L15-1 OS=Arabidopsis thaliana GN=RPL15A PE=2 SV=1}	{cam:101499337; K02877 RP-L15e, RPL15 large subunit ribosomal protein L15e - ko03010; Genetic Information Processing; Translation; Ribosome}	{At4g16720; KOG1678 60s ribosomal protein L15 J Translation, ribosomal structure and biogenesis ;}	{GO:0005840; ribosome; cellular_component GO:0006412; translation; biological_process GO:0003735; structural constituent of ribosome; molecular_function}	{KU312195.1; Trifolium repens ribosomal protein L15 mRNA, partial cds}	{PF00827:Ribosomal L15}
i0_HQ_c121094/f4p4/434	{ONM59002.1; Tubulin alpha-6 chain [Zea mays]}	{sp|Q0WV25|TBA4_ARATH; Tubulin alpha-4 chain OS=Arabidopsis thaliana GN=TUBA4 PE=2 SV=2}	{sita:101753745; K07374 TUBA tubulin alpha - ko04145; Cellular Processes; Transport and catabolism; Phagosome | ko04210; Cellular Processes; Cell growth and death; Apoptosis | ko04530; Cellular Processes; Cellular community - eukaryotes; Tight junction | ko04540; Cellular Processes; Cellular community - eukaryotes; Gap junction | ko05130; Human Diseases; Infectious diseases: Bacterial; Pathogenic…	{At4g14960; KOG1376 Alpha tubulin Z Cytoskeleton ;}	{NA}	{XM_003629688.2; Medicago truncatula tubulin beta-1 chain mRNA}	{NA}
i0_HQ_c121101/f3p3/707	{XP_013450565.1; ankyrin repeat 13B-like protein [Medicago truncatula]}	{NA}	{cam:101513586; K21437 - - - -}	{At3g04470; KOG0522 Ankyrin repeat protein R General function prediction only ;}	{NA}	{XM_004494685.2; PREDICTED: Cicer arietinum uncharacterized LOC101513586 (LOC101513586), transcript variant X3, mRNA}	{NA}
i0_HQ_c121104/f2p2/780	{GAU33847.1; hypothetical protein TSUD_393550 [Trifolium subterraneum]}	{sp|Q06931|ABR17_PEA; ABA-responsive protein ABR17 OS=Pisum sativum PE=2 SV=1}	{vra:106760214; - - - - -}	{NA}	{GO:0006952; defense response; biological_process GO:0009607; response to biotic stimulus; biological_process}	{AY059460.1; Trifolium repens cold responsive protein TRVSP mRNA, complete cds}	{PF00407:Pathogenesis-related protein Bet v I family}
i0_HQ_c12111/f3p4/782	{GAU44343.1; hypothetical protein TSUD_129170 [Trifolium subterraneum]}	{sp|Q6AXS3|DEK_RAT; Protein DEK OS=Rattus norvegicus GN=Dek PE=1 SV=1}	{cam:101513233; K17046 DEK protein DEK - -}	{At5g55660; KOG2266 Chromatin-associated protein Dek and related proteins, contains SAP DNA binding domain B Chromatin structure and dynamics ;}	{GO:0016021; integral to membrane; cellular_component GO:0006874; cellular calcium ion homeostasis; biological_process GO:0005219; ryanodine-sensitive calcium-release channel activity; molecular_function}	{XM_013604592.1; Medicago truncatula DEK carboxy-terminal domain protein mRNA}	{PF06459:Ryanodine Receptor TM 4-6}
i0_HQ_c121115/f3p35/635	{OMP07461.1; hypothetical protein CCACVL1_01298 [Corchorus capsularis]}	{NA}	{NA}	{NA}	{NA}	{KC894706.1; Trifolium repens plastid, complete genome}	{NA}
i0_HQ_c121121/f12p1/801	{XP_017405472.1; PREDICTED: 60S ribosomal protein L17-2 [Vigna angularis]}	{sp|P51413|RL172_ARATH; 60S ribosomal protein L17-2 OS=Arabidopsis thaliana GN=RPL17B PE=2 SV=2}	{var:108318987; K02880 RP-L17e, RPL17 large subunit ribosomal protein L17e - ko03010; Genetic Information Processing; Translation; Ribosome}	{At1g67430; KOG3353 60S ribosomal protein L22 J Translation, ribosomal structure and biogenesis ;}	{GO:0006412; translation; biological_process GO:0003735; structural constituent of ribosome; molecular_function GO:0005840; ribosome; cellular_component}	{XM_013591108.1; Medicago truncatula 60S ribosomal protein L17A mRNA}	{PF00237:Ribosomal protein L22p/L17e}
i0_HQ_c121124/f4p15/443	{XP_003617873.1; heat shock protein 81-2 [Medicago truncatula]}	{sp|P36181|HSP80_SOLLC; Heat shock cognate protein 80 OS=Solanum lycopersicum GN=HSC80 PE=2 SV=1}	{cam:101491735; K04079 HSP90A, htpG molecular chaperone HtpG - ko04141; Genetic Information Processing; Folding, sorting and degradation; Protein processing in endoplasmic reticulum | ko04151; Environmental Information Processing; Signal transduction; PI3K-Akt signaling pathway | ko04621; Organismal Systems; Immune system; NOD-like receptor signaling pathway | ko04612; Organismal Systems; Immune …	{At5g56010; KOG0019 Molecular chaperone (HSP90 family) O Posttranslational modification, protein turnover, chaperones ;}	{NA}	{XM_003617825.2; Medicago truncatula heat shock protein 81-2 mRNA}	{NA}
i0_HQ_c121129/f4p5/471	{GAU20717.1; hypothetical protein TSUD_231310 [Trifolium subterraneum]}	{sp|Q94AZ4|CML13_ARATH; Probable calcium-binding protein CML13 OS=Arabidopsis thaliana GN=CML13 PE=2 SV=1}	{nnu:104596240; K13448 CML calcium-binding protein CML - ko04626; Organismal Systems; Environmental adaptation; Plant-pathogen interaction}	{At1g12310; KOG0027 Calmodulin and related proteins (EF-Hand superfamily) T Signal transduction mechanisms ;}	{NA}	{XM_004511595.2; PREDICTED: Cicer arietinum probable calcium-binding protein CML13 (LOC101492145), mRNA}	{NA}
i0_HQ_c12113/f3p6/687	{GAU29731.1; hypothetical protein TSUD_392190 [Trifolium subterraneum]}	{NA}	{cam:101494889; - - - - -}	{At1g64720; KOG2761 START domain-containing proteins involved in steroidogenesis/phosphatidylcholine transfer I Lipid transport and metabolism ;}	{NA}	{XM_004495458.2; PREDICTED: Cicer arietinum uncharacterized LOC101494889 (LOC101494889), mRNA}	{NA}
i0_HQ_c121131/f6p0/435	{GAU18805.1; hypothetical protein TSUD_80940 [Trifolium subterraneum]}	{NA}	{mtr:MTR_8g087450; - - - - -}	{NA}	{NA}	{XM_012716836.1; PREDICTED: Cicer arietinum fasciclin-like arabinogalactan protein 12 (LOC101491264), mRNA}	{NA}
i0_HQ_c121133/f22p2/820	{GAU46374.1; hypothetical protein TSUD_141320 [Trifolium subterraneum]}	{sp|Q9FKC0|R13A4_ARATH; 60S ribosomal protein L13a-4 OS=Arabidopsis thaliana GN=RPL13AD PE=2 SV=1}	{vra:106758138; K02872 RP-L13Ae, RPL13A large subunit ribosomal protein L13Ae - ko03010; Genetic Information Processing; Translation; Ribosome}	{At5g48760; KOG3204 60S ribosomal protein L13a J Translation, ribosomal structure and biogenesis ;}	{GO:0003735; structural constituent of ribosome; molecular_function GO:0006412; translation; biological_process GO:0005840; ribosome; cellular_component}	{XM_004499168.2; PREDICTED: Cicer arietinum 60S ribosomal protein L13a-4 (LOC101506194), mRNA}	{PF00572:Ribosomal protein L13}
i0_HQ_c121137/f14p5/464	{GAU11001.1; hypothetical protein TSUD_112940 [Trifolium subterraneum]}	{sp|Q43292|RL372_ARATH; 60S ribosomal protein L37-2 OS=Arabidopsis thaliana GN=RPL37B PE=3 SV=2}	{cam:101508900; K02922 RP-L37e, RPL37 large subunit ribosomal protein L37e - ko03010; Genetic Information Processing; Translation; Ribosome}	{At1g52300; KOG3475 60S ribosomal protein L37 J Translation, ribosomal structure and biogenesis ;}	{NA}	{XM_004486682.2; PREDICTED: Cicer arietinum 60S ribosomal protein L37-3-like (LOC101508900), mRNA}	{NA}
i0_HQ_c121141/f3p9/768	{XP_016443822.1; PREDICTED: cytochrome b6 [Nicotiana tabacum]}	{sp|P56773|CYB6_ARATH; Cytochrome b6 OS=Arabidopsis thaliana GN=petB PE=1 SV=1}	{nta:107769160; - - - - -}	{AtCh052; KOG4663 Cytochrome b C Energy production and conversion ;}	{GO:0009055; NA GO:0016020; membrane; cellular_component GO:0016021; integral to membrane; cellular_component GO:0016491; oxidoreductase activity; molecular_function GO:0022904; respiratory electron transport chain; biological_process}	{EU849487.1; Trifolium subterraneum chloroplast, complete genome}	{PF01292:Prokaryotic cytochrome b561 PF13631:Cytochrome b(N-terminal)/b6/petB PF00033:Cytochrome b/b6/petB}
i0_HQ_c121145/f3p2/993	{XP_013458178.1; endo-1,3-1,4-beta-D-glucanase-like protein [Medicago truncatula]}	{sp|Q9ZT66|E134_MAIZE; Endo-1,3;1,4-beta-D-glucanase OS=Zea mays PE=1 SV=1}	{var:108322593; - - - - -}	{At3g23600; KOG3043 Predicted hydrolase related to dienelactone hydrolase R General function prediction only ;}	{GO:0016787; hydrolase activity; molecular_function}	{XM_013602724.1; Medicago truncatula endo-1,3-1,4-beta-D-glucanase-like protein mRNA}	{PF01738:Dienelactone hydrolase family}
i0_HQ_c121156/f2p0/592	{GAU28029.1; hypothetical protein TSUD_264870 [Trifolium subterraneum]}	{sp|P43399|MT1_TRIRP; Metallothionein-like protein 1 OS=Trifolium repens GN=MT1B PE=3 SV=1}	{adu:107474868; - - - - -}	{At3g09390; KOG4738 Predicted metallothionein P Inorganic ion transport and metabolism ;}	{NA}	{Z26493.1; T.repens TrMT1B mRNA for metallothionein-like protein}	{NA}
i0_HQ_c121157/f5p3/829	{GAU18900.1; hypothetical protein TSUD_228900 [Trifolium subterraneum]}	{NA}	{var:108320864; - - - - -}	{NA}	{NA}	{XM_004511352.2; PREDICTED: Cicer arietinum uncharacterized LOC101496924 (LOC101496924), transcript variant X2, mRNA}	{NA}
i0_HQ_c121160/f4p0/368	{YP_009159802.1; Ycf68 protein (chloroplast) [Carnegiea gigantea]}	{sp|Q49KT9|YCF68_EUCGG; Uncharacterized protein ycf68 OS=Eucalyptus globulus subsp. globulus GN=ycf68-1 PE=3 SV=1}	{mtr:MTR_0002s0260; - - - - -}	{NA}	{NA}	{KJ788292.1; Trifolium strictum chloroplast, complete genome}	{NA}
i0_HQ_c121172/f4p3/911	{XP_004509876.1; PREDICTED: albumin-2-like [Cicer arietinum]}	{sp|P08688|ALB2_PEA; Albumin-2 OS=Pisum sativum PE=2 SV=1}	{mtr:MTR_0057s0170; - - - - -}	{NA}	{GO:0015979; photosynthesis; biological_process GO:0042651; thylakoid membrane; cellular_component GO:0009654; oxygen evolving complex; cellular_component GO:0009523; photosystem II; cellular_component}	{AC209530.2; Medicago truncatula chromosome 7 BAC clone mte1-84j4, complete sequence}	{PF04725:Photosystem II 10 kDa polypeptide PsbR}
i0_HQ_c121182/f8p42/656	{BAE71252.1; putative phenylalanine ammonia lyase [Trifolium pratense]}	{sp|Q04593|PAL2_PEA; Phenylalanine ammonia-lyase 2 OS=Pisum sativum GN=PAL2 PE=2 SV=1}	{cam:101507594; K10775 PAL phenylalanine ammonia-lyase 4.3.1.24 ko00360; Metabolism; Amino acid metabolism; Phenylalanine metabolism | ko00940; Metabolism; Biosynthesis of other secondary metabolites; Phenylpropanoid biosynthesis}	{At2g37040; KOG0222 Phenylalanine and histidine ammonia-lyase Q Secondary metabolites biosynthesis, transport and catabolism ;}	{NA}	{AB236800.1; Trifolium pratense RNA for putative phenylalanine ammonia lyase, complete cds, clone: C1961}	{NA}
i0_HQ_c121183/f4p2/498	{XP_003603167.1; transmembrane protein, putative [Medicago truncatula]}	{NA}	{NA}	{NA}	{NA}	{AC147430.10; Medicago truncatula chromosome 8 clone mth2-71e6, complete sequence}	{NA}
i0_HQ_c121184/f5p4/984	{GAU11217.1; hypothetical protein TSUD_342070 [Trifolium subterraneum]}	{sp|P0C8Z0|Y8359_ORYSI; Uncharacterized protein OsI_027940 OS=Oryza sativa subsp. indica GN=OsI_027940 PE=1 SV=2}	{cam:101512168; - - - - -}	{At4g02450; KOG3158 HSP90 co-chaperone p23 O Posttranslational modification, protein turnover, chaperones ;}	{NA}	{XM_003625880.2; Medicago truncatula CS domain protein mRNA}	{NA}
i0_HQ_c121186/f18p0/398	{GAU38784.1; hypothetical protein TSUD_163590 [Trifolium subterraneum]}	{sp|O81208|OHP1_ARATH; Light-harvesting complex-like protein OHP1, chloroplastic OS=Arabidopsis thaliana GN=OHP1 PE=1 SV=1}	{cam:101492829; - - - - -}	{NA}	{NA}	{XM_004492110.2; PREDICTED: Cicer arietinum high-light-induced protein, chloroplastic (LOC101492829), mRNA}	{NA}
i0_HQ_c12120/f2p0/567	{GAU38980.1; hypothetical protein TSUD_378560 [Trifolium subterraneum]}	{sp|Q9C5D3|HIP7_ARATH; Heavy metal-associated isoprenylated plant protein 7 OS=Arabidopsis thaliana GN=HIPP07 PE=1 SV=1}	{cam:101490195; - - - - -}	{At5g63530; KOG1603 Copper chaperone P Inorganic ion transport and metabolism ;}	{GO:0004252; serine-type endopeptidase activity; molecular_function GO:0016020; membrane; cellular_component GO:0005634; nucleus; cellular_component GO:0005219; ryanodine-sensitive calcium-release channel activity; molecular_function GO:0003677; DNA binding; molecular_function GO:0006874; cellular calcium ion homeostasis; biological_process GO:0005666; DNA-directed RNA polymerase III complex; cel…	{XM_013607488.1; Medicago truncatula heavy metal transport/detoxification superfamily protein mRNA}	{PF05132:RNA polymerase III RPC4 PF06213:Cobalamin biosynthesis protein CobT PF08496:Peptidase family S49 N-terminal PF01080:Presenilin PF03348:Serine incorporator (Serinc) PF03286:Pox virus Ag35 surface protein PF11744:Aluminium activated malate transporter PF00403:Heavy-metal-associated domain PF02724:CDC45-like protein PF04636:PA26 p53-induced protein (sestrin) PF04088:Peroxin 13, N-terminal r…
i0_HQ_c121202/f41p1/517	{XP_003593113.1; Thionin-like protein [Medicago truncatula]}	{NA}	{lja:Lj0g3v0190179.1; - - - - -}	{NA}	{NA}	{XM_003593065.2; Medicago truncatula Thionin-like protein mRNA}	{NA}
i0_HQ_c121203/f2p0/594	{AAQ24852.1; 10 kDa photosystem II polypeptide [Trifolium pratense]}	{sp|Q40519|PSBR_TOBAC; Photosystem II 10 kDa polypeptide, chloroplastic OS=Nicotiana tabacum GN=PSBR PE=2 SV=1}	{cam:101505387; K03541 psbR photosystem II 10kDa protein - ko00195; Metabolism; Energy metabolism; Photosynthesis}	{NA}	{GO:0009523; photosystem II; cellular_component GO:0009654; oxygen evolving complex; cellular_component GO:0015979; photosynthesis; biological_process GO:0042651; thylakoid membrane; cellular_component}	{AY348557.1; Trifolium pratense 10 kDa photosystem II polypeptide mRNA, complete cds}	{PF04725:Photosystem II 10 kDa polypeptide PsbR}
i0_HQ_c121210/f32p3/919	{NP_001235615.1; uncharacterized protein LOC100500014 [Glycine max]}	{sp|P0DH94|VATL5_ARATH; V-type proton ATPase subunit c5 OS=Arabidopsis thaliana GN=VHA-c5 PE=2 SV=1}	{adu:107476616; K02155 ATPeV0C, ATP6L V-type H+-transporting ATPase 16kDa proteolipid subunit - ko00190; Metabolism; Energy metabolism; Oxidative phosphorylation | ko04145; Cellular Processes; Transport and catabolism; Phagosome | ko04142; Cellular Processes; Transport and catabolism; Lysosome | ko04966; Organismal Systems; Excretory system; Collecting duct acid secretion | ko04721; Organismal Sy…	{At2g16510; KOG0232 Vacuolar H+-ATPase V0 sector, subunits c/c' C Energy production and conversion ;}	{GO:0015991; ATP hydrolysis coupled proton transport; biological_process GO:0033177; proton-transporting two-sector ATPase complex, proton-transporting domain; cellular_component GO:0015078; hydrogen ion transmembrane transporter activity; molecular_function}	{XM_004507454.2; PREDICTED: Cicer arietinum V-type proton ATPase 16 kDa proteolipid subunit (LOC101498538), mRNA}	{PF00137:ATP synthase subunit C}
i0_HQ_c121214/f6p1/765	{XP_003614000.1; hypothetical protein MTR_5g043580 [Medicago truncatula]}	{NA}	{cam:101496271; - - - - -}	{NA}	{NA}	{XM_003613952.2; Medicago truncatula hypothetical protein mRNA}	{NA}
i0_HQ_c121218/f16p0/847	{XP_003608339.1; methionine sulfoxide reductase B 2 [Medicago truncatula]}	{sp|Q9C5C8|MSRB2_ARATH; Peptide methionine sulfoxide reductase B2, chloroplastic OS=Arabidopsis thaliana GN=MSRB2 PE=1 SV=1}	{aip:107626275; K07305 msrB peptide-methionine (R)-S-oxide reductase 1.8.4.12 -}	{At4g04800; KOG0856 Predicted pilin-like transcription factor O Posttranslational modification, protein turnover, chaperones ;}	{GO:0055114; oxidation-reduction process; biological_process GO:0033743; peptide-methionine (R)-S-oxide reductase activity; molecular_function GO:0016846; carbon-sulfur lyase activity; molecular_function GO:0008152; NA}	{XM_003608291.2; Medicago truncatula methionine sulfoxide reductase B 2 mRNA}	{PF01641:SelR domain PF04828:Glutathione-dependent formaldehyde-activating enzyme}
i0_HQ_c121219/f57p1/622	{GAU13095.1; hypothetical protein TSUD_173950 [Trifolium subterraneum]}	{sp|Q9FNE2|GRXC2_ARATH; Glutaredoxin-C2 OS=Arabidopsis thaliana GN=GRXC2 PE=2 SV=1}	{cam:101502199; K03676 grxC, GLRX, GLRX2 glutaredoxin 3 - -}	{At5g40370; KOG1752 Glutaredoxin and related proteins O Posttranslational modification, protein turnover, chaperones ;}	{GO:0045454; cell redox homeostasis; biological_process GO:0015035; protein disulfide oxidoreductase activity; molecular_function GO:0009055; NA}	{XM_013592776.1; Medicago truncatula glutaredoxin C4 mRNA}	{PF00462:Glutaredoxin PF01323:DSBA-like thioredoxin domain}
i0_HQ_c121220/f5p5/540	{GAU16644.1; hypothetical protein TSUD_325940 [Trifolium subterraneum]}	{sp|Q9FYF7|Y1736_ARATH; REF/SRPP-like protein At1g67360 OS=Arabidopsis thaliana GN=At1g67360 PE=2 SV=1}	{vra:106756065; - - - - -}	{NA}	{NA}	{CT737180.5; M.truncatula DNA sequence from clone MTH2-117L19 on chromosome 3, complete sequence}	{NA}
i0_HQ_c121222/f12p8/772	{KYP66269.1; Ubiquitin-conjugating enzyme E2 10, partial [Cajanus cajan]}	{sp|P35132|UBC9_ARATH; SUMO-conjugating enzyme UBC9 OS=Arabidopsis thaliana GN=UBC9 PE=1 SV=1}	{spen:107012087; - - - - -; spen:107012087; - - - - -}	{At4g27960; KOG0417 Ubiquitin-protein ligase O Posttranslational modification, protein turnover, chaperones ;}	{GO:0015031; protein transport; biological_process GO:0004871; signal transducer activity; molecular_function GO:0006464; protein modification process; biological_process GO:0005515; protein binding; molecular_function GO:0016881; acid-amino acid ligase activity; molecular_function GO:0007186; G-protein coupled receptor protein signaling pathway; biological_process GO:0005834; heterotrimeric G-pr…	{XM_004498337.2; PREDICTED: Cicer arietinum SUMO-conjugating enzyme UBC9-like (LOC101503200), transcript variant X1, mRNA}	{PF00631:GGL domain PF05773:RWD domain PF05743:UEV domain PF00179:Ubiquitin-conjugating enzyme}
i0_HQ_c121227/f16p4/537	{XP_014497797.1; PREDICTED: ubiquitin-40S ribosomal protein S27a-like [Vigna radiata var. radiata]}	{sp|P47905|RS27A_LUPAL; Ubiquitin-40S ribosomal protein S27a OS=Lupinus albus PE=3 SV=2}	{vra:106759237; K02977 RP-S27Ae, RPS27A small subunit ribosomal protein S27Ae - ko03010; Genetic Information Processing; Translation; Ribosome}	{At2g47110; KOG0004 Ubiquitin/40S ribosomal protein S27a fusion J Translation, ribosomal structure and biogenesis ;}	{GO:0005840; ribosome; cellular_component GO:0005515; protein binding; molecular_function GO:0005622; intracellular; cellular_component GO:0003735; structural constituent of ribosome; molecular_function GO:0006412; translation; biological_process GO:0008270; zinc ion binding; molecular_function}	{XM_004489767.2; PREDICTED: Cicer arietinum ubiquitin-40S ribosomal protein S27a (LOC101494112), mRNA}	{PF01485:IBR domain, a half RING-finger domain PF00240:Ubiquitin family PF01599:Ribosomal protein S27a}
i0_HQ_c121229/f32p1/860	{AEQ64868.1; ethylene response factor 8 [Medicago sativa]}	{sp|Q9FKG2|EF107_ARATH; Ethylene-responsive transcription factor ERF107 OS=Arabidopsis thaliana GN=ERF107 PE=2 SV=1}	{cam:101505675; - - - - -}	{NA}	{GO:0003700; sequence-specific DNA binding transcription factor activity; molecular_function GO:0006355; regulation of transcription, DNA-dependent; biological_process}	{XM_003589802.2; Medicago truncatula ethylene response factor mRNA}	{PF00847:AP2 domain}
i0_HQ_c121230/f18p87/998	{ANB59159.1; putative elongation factor 1-alpha, partial [Medicago ruthenica]}	{sp|O64937|EF1A_ORYSJ; Elongation factor 1-alpha OS=Oryza sativa subsp. japonica GN=REFA1 PE=2 SV=2}	{cam:101488243; K03231 EEF1A elongation factor 1-alpha - ko03013; Genetic Information Processing; Translation; RNA transport | ko05134; Human Diseases; Infectious diseases: Bacterial; Legionellosis}	{At1g07940; KOG0052 Translation elongation factor EF-1 alpha/Tu J Translation, ribosomal structure and biogenesis ;}	{GO:0046983; protein dimerization activity; molecular_function GO:0055114; oxidation-reduction process; biological_process GO:0005737; cytoplasm; cellular_component GO:0003942; N-acetyl-gamma-glutamyl-phosphate reductase activity; molecular_function GO:0005525; GTP binding; molecular_function GO:0016620; oxidoreductase activity, acting on the aldehyde or oxo group of donors, NAD or NADP as accept…	{CT010481.8; M.truncatula DNA sequence from clone MTH2-62G7 on chromosome 3, complete sequence}	{PF02774:Semialdehyde dehydrogenase, dimerisation domain PF03143:Elongation factor Tu C-terminal domain PF03144:Elongation factor Tu domain 2}
i0_HQ_c121232/f3p3/558	{XP_013455724.1; photosystem II reaction center protein H [Medicago truncatula]}	{NA}	{NA}	{NA}	{NA}	{KC894706.1; Trifolium repens plastid, complete genome}	{NA}
i0_HQ_c121238/f3p0/971	{AAR10886.1; chlorophyll a/b binding protein [Trifolium pratense]}	{sp|P07371|CB22_PEA; Chlorophyll a-b binding protein AB80, chloroplastic OS=Pisum sativum GN=AB80 PE=1 SV=1}	{csv:101211276; K08912 LHCB1 light-harvesting complex II chlorophyll a/b binding protein 1 - ko00196; Metabolism; Energy metabolism; Photosynthesis - antenna proteins}	{NA}	{GO:0003824; NA GO:0046872; metal ion binding; molecular_function}	{AY430082.1; Trifolium pratense chlorophyll a/b binding protein mRNA, complete cds; nuclear gene for chloroplast product}	{PF10143:2,3-bisphosphoglycerate-independent phosphoglycerate mutase}
i0_HQ_c121239/f5p22/486	{XP_013457870.1; plasma membrane H+-ATPase [Medicago truncatula]}	{sp|Q9SU58|PMA4_ARATH; ATPase 4, plasma membrane-type OS=Arabidopsis thaliana GN=AHA4 PE=2 SV=2}	{aip:107633670; K01535 PMA1, PMA2 H+-transporting ATPase 3.6.3.6 ko00190; Metabolism; Energy metabolism; Oxidative phosphorylation}	{At3g47950; KOG0205 Plasma membrane H+-transporting ATPase P Inorganic ion transport and metabolism ;}	{NA}	{XM_013602416.1; Medicago truncatula plasma membrane H+-ATPase mRNA}	{NA}
i0_HQ_c121249/f12p12/721	{XP_014518340.1; PREDICTED: actin-7-like [Vigna radiata var. radiata]}	{sp|Q10AZ4|ACT3_ORYSJ; Actin-3 OS=Oryza sativa subsp. japonica GN=ACT3 PE=2 SV=1}	{cam:101501090; K10355 ACTF actin, other eukaryote - -}	{At5g09810; KOG0676 Actin and related proteins Z Cytoskeleton ;}	{NA}	{XM_004485477.2; PREDICTED: Cicer arietinum actin-101-like (LOC101501090), mRNA}	{NA}
i0_HQ_c121277/f2p1/644	{GAU50704.1; hypothetical protein TSUD_301090 [Trifolium subterraneum]}	{sp|O23758|NLTP_CICAR; Non-specific lipid-transfer protein OS=Cicer arietinum PE=3 SV=1}	{pvu:PHAVU_010G069100g; - - - - -}	{NA}	{NA}	{BT051321.1; Medicago truncatula clone MTYF1_F2_F3_F41G-H-6 unknown mRNA}	{NA}
i0_HQ_c121284/f5p2/480	{GAU11293.1; hypothetical protein TSUD_342840 [Trifolium subterraneum]}	{sp|Q9LZP9|CP122_ARATH; Calvin cycle protein CP12-2, chloroplastic OS=Arabidopsis thaliana GN=CP12-2 PE=1 SV=1}	{cam:101500634; - - - - -}	{NA}	{GO:0016798; hydrolase activity, acting on glycosyl bonds; molecular_function}	{XM_003625921.2; Medicago truncatula calvin cycle protein CP12-1 mRNA}	{PF04227:Indigoidine synthase A like protein}
i0_HQ_c121295/f4p52/344	{NA}	{NA}	{NA}	{NA}	{NA}	{AB236805.1; Trifolium pratense RNA for putative adenosylhomocysteinase, complete cds, clone: C2047}	{NA}
i0_HQ_c121299/f3p0/919	{BAE71271.1; putative PSII-P protein, partial [Trifolium pratense]}	{sp|P16059|PSBP_PEA; Oxygen-evolving enhancer protein 2, chloroplastic OS=Pisum sativum GN=PSBP PE=1 SV=1}	{pvu:PHAVU_008G196500g; K02717 psbP photosystem II oxygen-evolving enhancer protein 2 - ko00195; Metabolism; Energy metabolism; Photosynthesis}	{NA}	{GO:0019898; extrinsic to membrane; cellular_component GO:0005509; calcium ion binding; molecular_function GO:0015979; photosynthesis; biological_process GO:0009654; oxygen evolving complex; cellular_component GO:0009523; photosystem II; cellular_component}	{AB236819.1; Trifolium pratense RNA for putative PSII-P protein, partial cds, clone: C214}	{PF01789:PsbP PF05757:Oxygen evolving enhancer protein 3 (PsbQ)}
i0_HQ_c1213/f22p5/950	{XP_003603874.1; photosystem II reaction center PsbP family protein [Medicago truncatula]}	{sp|Q9S720|PPD3_ARATH; PsbP domain-containing protein 3, chloroplastic OS=Arabidopsis thaliana GN=PPD3 PE=1 SV=2}	{gmx:100785276; - - - - -}	{NA}	{GO:0015979; photosynthesis; biological_process GO:0005509; calcium ion binding; molecular_function GO:0019898; extrinsic to membrane; cellular_component GO:0009523; photosystem II; cellular_component GO:0009654; oxygen evolving complex; cellular_component}	{XM_003603826.2; Medicago truncatula photosystem II reaction center PsbP family protein mRNA}	{PF01789:PsbP}
i0_HQ_c121303/f3p0/446	{AFK47612.1; unknown [Medicago truncatula]}	{sp|Q39459|MT2_CICAR; Metallothionein-like protein 2 OS=Cicer arietinum PE=3 SV=2}	{cam:101504992; - - - - -}	{NA}	{NA}	{Z26492.1; T.repens TrMT1A mRNA for metallothionein-like protein}	{NA}
i0_HQ_c121312/f26p0/563	{GAU19741.1; hypothetical protein TSUD_78670 [Trifolium subterraneum]}	{NA}	{mtr:MTR_8g091590; - - - - -}	{NA}	{NA}	{NA}	{NA}
i0_HQ_c121316/f2p0/420	{GAU27112.1; hypothetical protein TSUD_104210 [Trifolium subterraneum]}	{NA}	{cam:101514183; - - - - -}	{NA}	{NA}	{XM_013609695.1; Medicago truncatula hypothetical protein mRNA}	{NA}
i0_HQ_c121319/f4p1/317	{GAU36472.1; hypothetical protein TSUD_166380 [Trifolium subterraneum]}	{NA}	{gra:105769756; - - - - -}	{NA}	{NA}	{XM_013592519.1; Medicago truncatula transmembrane protein, putative mRNA}	{NA}
i0_HQ_c121321/f4p4/420	{GAU11217.1; hypothetical protein TSUD_342070 [Trifolium subterraneum]}	{NA}	{mtr:MTR_8g058597; - - - - -}	{NA}	{NA}	{XM_013594898.1; Medicago truncatula CS domain protein mRNA}	{NA}
i0_HQ_c121322/f2p10/767	{GAU20147.1; hypothetical protein TSUD_352090 [Trifolium subterraneum]}	{sp|Q9ZRI7|EF1G1_ORYSJ; Elongation factor 1-gamma 1 OS=Oryza sativa subsp. japonica GN=Os02g0220600 PE=2 SV=1}	{cam:101496237; K03233 EEF1G elongation factor 1-gamma - ko05134; Human Diseases; Infectious diseases: Bacterial; Legionellosis}	{At1g09640_2; KOG1627 Translation elongation factor EF-1 gamma J Translation, ribosomal structure and biogenesis ;}	{GO:0005853; eukaryotic translation elongation factor 1 complex; cellular_component GO:0003746; translation elongation factor activity; molecular_function GO:0006414; translational elongation; biological_process}	{XM_013604591.1; Medicago truncatula translation elongation factor EF1B, gamma chain mRNA}	{PF00647:Elongation factor 1 gamma, conserved domain}
i0_HQ_c12133/f15p7/1004	{GAU23638.1; hypothetical protein TSUD_386270 [Trifolium subterraneum]}	{sp|Q9M3V8|RS6_ASPOF; 40S ribosomal protein S6 OS=Asparagus officinalis GN=rps6 PE=2 SV=1}	{cam:101500252; K02991 RP-S6e, RPS6 small subunit ribosomal protein S6e - ko03010; Genetic Information Processing; Translation; Ribosome | ko04371; Environmental Information Processing; Signal transduction; Apelin signaling pathway | ko04066; Environmental Information Processing; Signal transduction; HIF-1 signaling pathway | ko04151; Environmental Information Processing; Signal transduction; PI3…	{At5g10360; KOG1646 40S ribosomal protein S6 J Translation, ribosomal structure and biogenesis ;}	{GO:0006412; translation; biological_process GO:0003735; structural constituent of ribosome; molecular_function GO:0005622; intracellular; cellular_component GO:0005840; ribosome; cellular_component}	{XM_004485741.2; PREDICTED: Cicer arietinum 40S ribosomal protein S6 (LOC101500252), mRNA}	{PF01092:Ribosomal protein S6e}
i0_HQ_c121336/f4p3/468	{AFK34399.1; unknown [Lotus japonicus]}	{sp|O22584|RS14_LUPLU; 40S ribosomal protein S14 OS=Lupinus luteus GN=RPS14 PE=2 SV=1}	{cam:101489775; K02955 RP-S14e, RPS14 small subunit ribosomal protein S14e - ko03010; Genetic Information Processing; Translation; Ribosome}	{Hs5032051; KOG0407 40S ribosomal protein S14 J Translation, ribosomal structure and biogenesis ;}	{NA}	{XM_004504626.2; PREDICTED: Cicer arietinum 40S ribosomal protein S14 (LOC101489975), mRNA}	{NA}
i0_HQ_c121350/f17p3/728	{XP_003593950.2; ribosomal protein S11 [Medicago truncatula]}	{sp|O22584|RS14_LUPLU; 40S ribosomal protein S14 OS=Lupinus luteus GN=RPS14 PE=2 SV=1}	{cam:101489775; K02955 RP-S14e, RPS14 small subunit ribosomal protein S14e - ko03010; Genetic Information Processing; Translation; Ribosome}	{At3g11510; KOG0407 40S ribosomal protein S14 J Translation, ribosomal structure and biogenesis ;}	{GO:2001070; NA GO:0005840; ribosome; cellular_component GO:0006412; translation; biological_process GO:0003735; structural constituent of ribosome; molecular_function}	{XM_004504626.2; PREDICTED: Cicer arietinum 40S ribosomal protein S14 (LOC101489975), mRNA}	{PF00411:Ribosomal protein S11 PF03423:Carbohydrate binding domain (family 25)}
i0_HQ_c121354/f4p1/370	{YP_009159802.1; Ycf68 protein (chloroplast) [Carnegiea gigantea]}	{sp|Q49KT9|YCF68_EUCGG; Uncharacterized protein ycf68 OS=Eucalyptus globulus subsp. globulus GN=ycf68-1 PE=3 SV=1}	{mtr:MTR_0002s0260; - - - - -}	{NA}	{NA}	{KJ788292.1; Trifolium strictum chloroplast, complete genome}	{NA}
i0_HQ_c121355/f3p1/801	{GAU51179.1; hypothetical protein TSUD_181890 [Trifolium subterraneum]}	{sp|Q39654|PSAL_CUCSA; Photosystem I reaction center subunit XI, chloroplastic OS=Cucumis sativus GN=PSAL PE=2 SV=1}	{cam:101507573; K02699 psaL photosystem I subunit XI - ko00195; Metabolism; Energy metabolism; Photosynthesis}	{NA}	{GO:0009538; photosystem I reaction center; cellular_component GO:0015979; photosynthesis; biological_process GO:0009522; photosystem I; cellular_component}	{XM_003624114.2; Medicago truncatula photosystem I reaction center subunit XI mRNA}	{PF02605:Photosystem I reaction centre subunit XI}
i0_HQ_c121359/f3p1/614	{GAU30834.1; hypothetical protein TSUD_267540 [Trifolium subterraneum]}	{sp|O23758|NLTP_CICAR; Non-specific lipid-transfer protein OS=Cicer arietinum PE=3 SV=1}	{pvu:PHAVU_010G066400g; - - - - -}	{NA}	{NA}	{BT051321.1; Medicago truncatula clone MTYF1_F2_F3_F41G-H-6 unknown mRNA}	{NA}
i0_HQ_c121372/f2p1/803	{GAU51179.1; hypothetical protein TSUD_181890 [Trifolium subterraneum]}	{sp|Q41385|PSAL_SPIOL; Photosystem I reaction center subunit XI, chloroplastic OS=Spinacia oleracea GN=PSAL PE=1 SV=1}	{cam:101507573; K02699 psaL photosystem I subunit XI - ko00195; Metabolism; Energy metabolism; Photosynthesis}	{NA}	{GO:0009538; photosystem I reaction center; cellular_component GO:0015979; photosynthesis; biological_process GO:0009522; photosystem I; cellular_component GO:0009522; photosystem I; cellular_component GO:0015979; photosynthesis; biological_process GO:0009538; photosystem I reaction center; cellular_component}	{XM_003624114.2; Medicago truncatula photosystem I reaction center subunit XI mRNA}	{PF02605:Photosystem I reaction centre subunit XI PF02605:Photosystem I reaction centre subunit XI}
i0_HQ_c121381/f2p1/412	{GAU18011.1; hypothetical protein TSUD_51210 [Trifolium subterraneum]}	{sp|Q9M4T8|PSA5_SOYBN; Proteasome subunit alpha type-5 OS=Glycine max GN=PAE1 PE=2 SV=1}	{pvu:PHAVU_007G021000g; K02729 PSMA5 20S proteasome subunit alpha 5 3.4.25.1 ko03050; Genetic Information Processing; Folding, sorting and degradation; Proteasome}	{At3g14290; KOG0176 20S proteasome, regulatory subunit alpha type PSMA5/PUP2 O Posttranslational modification, protein turnover, chaperones ;}	{NA}	{BT051466.1; Medicago truncatula clone MTYF1_F2_F3_F41G-P-19 unknown mRNA}	{NA}
i0_HQ_c121383/f4p0/613	{XP_013468578.1; photosystem II reaction center W [Medicago truncatula]}	{sp|Q41387|PSBW_SPIOL; Photosystem II reaction center W protein, chloroplastic OS=Spinacia oleracea GN=psbW PE=1 SV=1}	{cam:101513777; K02721 psbW photosystem II PsbW protein - ko00195; Metabolism; Energy metabolism; Photosynthesis}	{NA}	{GO:0015979; photosynthesis; biological_process GO:0009507; chloroplast; cellular_component GO:0009523; photosystem II; cellular_component}	{XM_013613124.1; Medicago truncatula photosystem II reaction center W mRNA}	{PF07123:Photosystem II reaction centre W protein (PsbW)}
i0_HQ_c121386/f4p3/551	{GAU11758.1; hypothetical protein TSUD_75090 [Trifolium subterraneum]}	{sp|P29677|MPPA_SOLTU; Mitochondrial-processing peptidase subunit alpha OS=Solanum tuberosum GN=MPP PE=1 SV=1}	{mtr:MTR_8g102230; K01412 PMPCA, MAS2 mitochondrial-processing peptidase subunit alpha 3.4.24.64 -}	{At1g51980; KOG2067 Mitochondrial processing peptidase, alpha subunit O Posttranslational modification, protein turnover, chaperones ;}	{NA}	{XM_004503451.2; PREDICTED: Cicer arietinum mitochondrial-processing peptidase subunit alpha-like (LOC101491151), mRNA}	{NA}
i0_HQ_c121392/f4p1/529	{GAU42009.1; hypothetical protein TSUD_236760 [Trifolium subterraneum]}	{sp|Q9FVR6|Y1222_ARATH; Uncharacterized protein At1g32220, chloroplastic OS=Arabidopsis thaliana GN=At1g32220 PE=2 SV=1}	{pper:PRUPE_ppa009219mg; - - - - -}	{At1g32220; KOG4288 Predicted oxidoreductase R General function prediction only ;}	{NA}	{XM_003612757.2; Medicago truncatula rossmann-fold NAD(P)-binding domain protein mRNA}	{NA}
i0_HQ_c121397/f6p18/346	{GAU46334.1; hypothetical protein TSUD_28510 [Trifolium subterraneum]}	{NA}	{NA}	{NA}	{NA}	{XM_003590712.2; Medicago truncatula sieve element occlusion protein mRNA}	{NA}
i0_HQ_c121420/f30p2/556	{GAU17113.1; hypothetical protein TSUD_106120 [Trifolium subterraneum]}	{sp|Q6Z1D5|ATG8C_ORYSJ; Autophagy-related protein 8C OS=Oryza sativa subsp. japonica GN=ATG8C PE=2 SV=1}	{pop:POPTR_0002s21290g; K08341 GABARAP, ATG8, LC3 GABA(A) receptor-associated protein - ko04371; Environmental Information Processing; Signal transduction; Apelin signaling pathway | ko04068; Environmental Information Processing; Signal transduction; FoxO signaling pathway | ko04140; Cellular Processes; Transport and catabolism; Autophagy - animal | ko04138; Cellular Processes; Transport and cata…	{At2g05630; KOG1654 Microtubule-associated anchor protein involved in autophagy and membrane trafficking Z Cytoskeleton ;}	{GO:0005737; cytoplasm; cellular_component GO:0000045; autophagic vacuole assembly; biological_process}	{BT137512.1; Medicago truncatula clone JCVI-FLMt-5A11 unknown mRNA}	{PF04110:Ubiquitin-like autophagy protein Apg12 }
i0_HQ_c121422/f2p0/797	{GAU33847.1; hypothetical protein TSUD_393550 [Trifolium subterraneum]}	{sp|Q06931|ABR17_PEA; ABA-responsive protein ABR17 OS=Pisum sativum PE=2 SV=1}	{vra:106760214; - - - - -}	{NA}	{GO:0006952; defense response; biological_process GO:0009607; response to biotic stimulus; biological_process}	{AY059460.1; Trifolium repens cold responsive protein TRVSP mRNA, complete cds}	{PF00407:Pathogenesis-related protein Bet v I family}
i0_HQ_c121431/f4p42/375	{AJE72129.1; ATP synthase CF1 epsilon subunit (plastid) [Trifolium pratense]}	{sp|Q2L911|ATPE_GOSHI; ATP synthase epsilon chain, chloroplastic OS=Gossypium hirsutum GN=atpE PE=3 SV=1}	{mtr:MTR_1829s0010; K02112 ATPF1B, atpD F-type H+-transporting ATPase subunit beta 3.6.3.14 ko00190; Metabolism; Energy metabolism; Oxidative phosphorylation | ko00195; Metabolism; Energy metabolism; Photosynthesis}	{AtCh029; KOG1758 Mitochondrial F1F0-ATP synthase, subunit delta/ATP16 C Energy production and conversion ;}	{GO:0046961; proton-transporting ATPase activity, rotational mechanism; molecular_function GO:0046933; hydrogen ion transporting ATP synthase activity, rotational mechanism; molecular_function GO:0015986; ATP synthesis coupled proton transport; biological_process GO:0045261; proton-transporting ATP synthase complex, catalytic core F(1); cellular_component}	{KP126856.1; Trifolium pratense voucher Steele 1112 plastid sequence}	{PF02823:ATP synthase, Delta/Epsilon chain, beta-sandwich domain}
i0_HQ_c121435/f2p1/336	{GAU17584.1; hypothetical protein TSUD_341280 [Trifolium subterraneum]}	{sp|O24111|RS5_NICPL; 40S ribosomal protein S5 (Fragment) OS=Nicotiana plumbaginifolia GN=RPS5 PE=2 SV=1}	{lang:109341112; K02989 RP-S5e, RPS5 small subunit ribosomal protein S5e - ko03010; Genetic Information Processing; Translation; Ribosome; lang:109341112; - - - - -}	{At2g37270; KOG3291 Ribosomal protein S7 J Translation, ribosomal structure and biogenesis ;}	{NA}	{XM_016113776.1; PREDICTED: Arachis duranensis 40S ribosomal protein S5-like (LOC107492719), mRNA}	{NA}
i0_HQ_c121438/f2p1/605	{XP_013455191.1; Lipid transfer protein, partial [Medicago truncatula]}	{sp|O23758|NLTP_CICAR; Non-specific lipid-transfer protein OS=Cicer arietinum PE=3 SV=1}	{pvu:PHAVU_010G066400g; - - - - -}	{NA}	{NA}	{BT051321.1; Medicago truncatula clone MTYF1_F2_F3_F41G-H-6 unknown mRNA}	{NA}
i0_HQ_c121444/f3p1/460	{GAU12632.1; hypothetical protein TSUD_121230 [Trifolium subterraneum]}	{sp|B3EWI4|PST2_PETHY; Photosystem II 5 kDa protein, chloroplastic OS=Petunia hybrida PE=1 SV=1}	{lja:Lj0g3v0128219.1; - - - - -}	{NA}	{GO:0008121; ubiquinol-cytochrome-c reductase activity; molecular_function GO:0055114; oxidation-reduction process; biological_process}	{XM_003599210.2; Medicago truncatula photosystem II 5 kDa protein mRNA}	{PF10399:Ubiquitinol-cytochrome C reductase Fe-S subunit TAT signal}
i0_HQ_c121454/f5p26/980	{KOM48406.1; hypothetical protein LR48_Vigan07g211000 [Vigna angularis]}	{NA}	{mtr:MTR_0052s0060; - - - - -}	{NA}	{NA}	{XM_004516711.2; PREDICTED: Cicer arietinum uncharacterized LOC101496645 (LOC101496645), mRNA}	{NA}
i0_HQ_c121469/f6p1/375	{NA}	{NA}	{NA}	{NA}	{NA}	{NA}	{NA}
i0_HQ_c121473/f4p4/561	{GAU20330.1; hypothetical protein TSUD_338110 [Trifolium subterraneum]}	{sp|Q8GY31|CDC25_ARATH; Dual specificity phosphatase Cdc25 OS=Arabidopsis thaliana GN=CDC25 PE=1 SV=1}	{mtr:MTR_7g102310; K18065 CDC25 Cdc25 family phosphatase [EC:3.1.3.48 1.20.4.-] 3.1.3.48,1.20.4.- -}	{At5g03460; KOG3772 M-phase inducer phosphatase D Cell cycle control, cell division, chromosome partitioning ;}	{NA}	{BT143226.1; Medicago truncatula clone JCVI-FLMt-6D24 unknown mRNA}	{NA}
i0_HQ_c121474/f13p2/535	{XP_002265672.1; PREDICTED: ubiquitin-conjugating enzyme E2-17 kDa [Vitis vinifera]}	{sp|P35135|UBC4_SOLLC; Ubiquitin-conjugating enzyme E2-17 kDa OS=Solanum lycopersicum PE=2 SV=1}	{nta:107770438; - - - - -}	{At1g64230; KOG0417 Ubiquitin-protein ligase O Posttranslational modification, protein turnover, chaperones ;}	{GO:0016881; acid-amino acid ligase activity; molecular_function GO:0005515; protein binding; molecular_function GO:0015031; protein transport; biological_process GO:0006464; protein modification process; biological_process}	{XM_013598723.1; Medicago truncatula ubiquitin-conjugating enzyme E2 mRNA}	{PF00179:Ubiquitin-conjugating enzyme PF05773:RWD domain PF05743:UEV domain}
i0_HQ_c121490/f11p3/942	{GAU24359.1; hypothetical protein TSUD_390680 [Trifolium subterraneum]}	{sp|O74978|YQL5_SCHPO; Uncharacterized RNA-binding protein C1827.05c OS=Schizosaccharomyces pombe (strain 972 / ATCC 24843) GN=SPCC1827.05c PE=4 SV=1}	{cam:101493632; K14838 NOP15 nucleolar protein 15 - -}	{At5g04600; KOG4208 Nucleolar RNA-binding protein NIFK R General function prediction only ;}	{GO:0003676; nucleic acid binding; molecular_function}	{XM_003592494.2; Medicago truncatula MKI67 interacting nucleolar phosphoprotein mRNA}	{PF00076:RNA recognition motif. (a.k.a. RRM, RBD, or RNP domain)}
i0_HQ_c121491/f2p0/761	{NA}	{NA}	{NA}	{NA}	{NA}	{KC247802.1; Trifolium repens isolate pSK7-3 KS-dehydrin mRNA, complete cds}	{NA}
i0_HQ_c121494/f7p4/752	{XP_003630279.1; ribosomal protein L7Ae/L30e/S12e/Gadd45 family protein [Medicago truncatula]}	{sp|Q9XHS0|RS12_HORVU; 40S ribosomal protein S12 OS=Hordeum vulgare GN=RPS12 PE=2 SV=1}	{mtr:MTR_8g093770; K02951 RP-S12e, RPS12 small subunit ribosomal protein S12e - ko03010; Genetic Information Processing; Translation; Ribosome}	{At2g32060; KOG3406 40S ribosomal protein S12 J Translation, ribosomal structure and biogenesis ;}	{NA}	{XM_003630231.2; Medicago truncatula ribosomal protein L7Ae/L30e/S12e/Gadd45 family protein mRNA}	{NA}
i0_HQ_c121496/f6p1/561	{GAU35031.1; hypothetical protein TSUD_103540 [Trifolium subterraneum]}	{NA}	{jcu:105632660; - - - - -}	{NA}	{NA}	{XM_013609473.1; Medicago truncatula acytochrome-C oxidase/electron carrier protein mRNA}	{NA}
i0_HQ_c121518/f3p3/669	{XP_013451083.1; RALF [Medicago truncatula]}	{NA}	{gra:105789440; - - - - -}	{NA}	{NA}	{XM_013595629.1; Medicago truncatula RALF mRNA}	{NA}
i0_HQ_c121520/f7p1/372	{GAU50960.1; hypothetical protein TSUD_378930 [Trifolium subterraneum]}	{sp|Q3E902|RS212_ARATH; 40S ribosomal protein S21-2 OS=Arabidopsis thaliana GN=RPS21C PE=1 SV=2}	{cam:101492164; K02971 RP-S21e, RPS21 small subunit ribosomal protein S21e - ko03010; Genetic Information Processing; Translation; Ribosome}	{At5g27700; KOG3486 40S ribosomal protein S21 J Translation, ribosomal structure and biogenesis ;}	{NA}	{XM_013607800.1; Medicago truncatula 40S ribosomal S21-like protein mRNA}	{NA}
i0_HQ_c121521/f5p104/659	{ACU16717.1; unknown [Glycine max]}	{sp|P93313|NU4M_ARATH; NADH-ubiquinone oxidoreductase chain 4 OS=Arabidopsis thaliana GN=ND4 PE=2 SV=2}	{bpg:BathyMg00070; K03881 ND4 NADH-ubiquinone oxidoreductase chain 4 1.6.5.3 ko00190; Metabolism; Energy metabolism; Oxidative phosphorylation | ko05012; Human Diseases; Neurodegenerative diseases; Parkinson's disease}	{AtMi046; KOG4845 NADH dehydrogenase, subunit 4 C Energy production and conversion ;}	{GO:0008137; NADH dehydrogenase (ubiquinone) activity; molecular_function GO:0055114; oxidation-reduction process; biological_process}	{AK337634.1; Lotus japonicus cDNA, clone: LjFL1-072-CD11, HTC}	{PF00361:Proton-conducting membrane transporter}
i0_HQ_c121522/f2p12/753	{GAU14994.1; hypothetical protein TSUD_47890 [Trifolium subterraneum]}	{sp|Q9XJ35|CLPR1_ARATH; ATP-dependent Clp protease proteolytic subunit-related protein 1, chloroplastic OS=Arabidopsis thaliana GN=CLPR1 PE=1 SV=1}	{cam:101491976; K01358 clpP, CLPP ATP-dependent Clp protease, protease subunit 3.4.21.92 ko04112; Cellular Processes; Cell growth and death; Cell cycle - Caulobacter | ko04212; Organismal Systems; Aging; Longevity regulating pathway - worm}	{At1g49970; KOG0840 ATP-dependent Clp protease, proteolytic subunit O Posttranslational modification, protein turnover, chaperones ;}	{NA}	{XM_003592441.2; Medicago truncatula ATP-dependent Clp protease proteolytic protein mRNA}	{NA}
i0_HQ_c121525/f72p16/876	{XP_003626964.1; polyketide cyclase/dehydrase and lipid transporter [Medicago truncatula]}	{sp|Q9SSK5|MLP43_ARATH; MLP-like protein 43 OS=Arabidopsis thaliana GN=MLP43 PE=1 SV=1}	{mtr:MTR_8g012550; - - - - -}	{NA}	{GO:0009607; response to biotic stimulus; biological_process GO:0006952; defense response; biological_process}	{XM_003626916.2; Medicago truncatula polyketide cyclase/dehydrase and lipid transporter mRNA}	{PF00407:Pathogenesis-related protein Bet v I family}
i0_HQ_c121527/f14p33/878	{GAU15977.1; hypothetical protein TSUD_42000 [Trifolium subterraneum]}	{NA}	{cam:101497185; - - - - -}	{NA}	{GO:0003676; nucleic acid binding; molecular_function GO:0004523; ribonuclease H activity; molecular_function}	{NA}	{PF00075:RNase H}
i0_HQ_c121529/f34p29/852	{XP_003617948.1; light-harvesting complex I chlorophyll A/B-binding protein [Medicago truncatula]}	{sp|P27520|CB215_PEA; Chlorophyll a-b binding protein 215, chloroplastic OS=Pisum sativum GN=CAB215 PE=1 SV=1}	{pvu:PHAVU_008G285100g; K08913 LHCB2 light-harvesting complex II chlorophyll a/b binding protein 2 - ko00196; Metabolism; Energy metabolism; Photosynthesis - antenna proteins}	{NA}	{NA}	{XM_003617900.2; Medicago truncatula light-harvesting complex I chlorophyll A/B-binding protein mRNA}	{NA}
i0_HQ_c12153/f9p5/663	{XP_003618057.1; transmembrane protein, putative [Medicago truncatula]}	{NA}	{pvu:PHAVU_008G289000g; - - - - -}	{NA}	{NA}	{XM_004491565.2; PREDICTED: Cicer arietinum uncharacterized LOC101491420 (LOC101491420), mRNA}	{NA}
i0_HQ_c121530/f15p2/857	{GAU36908.1; hypothetical protein TSUD_331810 [Trifolium subterraneum]}	{sp|Q9FJ98|RPD6A_ARATH; DNA-directed RNA polymerases II, IV and V subunit 6A OS=Arabidopsis thaliana GN=NRPB6A PE=1 SV=1}	{cam:101494253; K03014 RPB6, POLR2F DNA-directed RNA polymerases I, II, and III subunit RPABC2 - ko00230; Metabolism; Nucleotide metabolism; Purine metabolism | ko00240; Metabolism; Nucleotide metabolism; Pyrimidine metabolism | ko03020; Genetic Information Processing; Transcription; RNA polymerase | ko04623; Organismal Systems; Immune system; Cytosolic DNA-sensing pathway | ko05016; Human Diseas…	{At5g51940; KOG3405 RNA polymerase subunit K K Transcription ;}	{GO:0003899; DNA-directed RNA polymerase activity; molecular_function GO:0006351; transcription, DNA-dependent; biological_process GO:0003677; DNA binding; molecular_function}	{XM_003625143.2; Medicago truncatula DNA-directed RNA polymerase I, II mRNA}	{PF01192:RNA polymerase Rpb6 }
i0_HQ_c121533/f13p5/895	{NA}	{NA}	{NA}	{NA}	{NA}	{XM_003616763.2; Medicago truncatula hypothetical protein mRNA}	{NA}
i0_HQ_c121534/f13p7/920	{GAU16644.1; hypothetical protein TSUD_325940 [Trifolium subterraneum]}	{sp|Q9FYF7|Y1736_ARATH; REF/SRPP-like protein At1g67360 OS=Arabidopsis thaliana GN=At1g67360 PE=2 SV=1}	{var:108319041; - - - - -}	{NA}	{NA}	{XM_003601738.2; Medicago truncatula rubber elongation factor protein mRNA}	{NA}
i0_HQ_c121535/f16p3/674	{XP_003593950.2; ribosomal protein S11 [Medicago truncatula]}	{sp|O22584|RS14_LUPLU; 40S ribosomal protein S14 OS=Lupinus luteus GN=RPS14 PE=2 SV=1}	{cam:101489775; K02955 RP-S14e, RPS14 small subunit ribosomal protein S14e - ko03010; Genetic Information Processing; Translation; Ribosome}	{At3g11510; KOG0407 40S ribosomal protein S14 J Translation, ribosomal structure and biogenesis ;}	{GO:0003735; structural constituent of ribosome; molecular_function GO:0006412; translation; biological_process GO:0005840; ribosome; cellular_component GO:2001070; NA}	{XM_004504626.2; PREDICTED: Cicer arietinum 40S ribosomal protein S14 (LOC101489975), mRNA}	{PF03423:Carbohydrate binding domain (family 25) PF00411:Ribosomal protein S11}
i0_HQ_c121547/f17p24/983	{AFR59963.1; putative photosystem I assembly protein Ycf4 (plastid) [Medicago truncatula]}	{sp|Q9BBR9|YCF4_LOTJA; Photosystem I assembly protein Ycf4 OS=Lotus japonicus GN=ycf4 PE=3 SV=1}	{mis:MICPUN_104909; - - - - -}	{NA}	{GO:0009522; photosystem I; cellular_component GO:0009579; thylakoid; cellular_component GO:0015979; photosynthesis; biological_process GO:0016021; integral to membrane; cellular_component}	{KF743848.1; Trifolium pratense photosystem I subunit VIII (psaI), photosystem I assembly protein ycf4 (ycf4), and chloroplast envelope membrane protein (cemA) genes, complete cds; chloroplast}	{PF02392:Ycf4}
i0_HQ_c121548/f14p2/538	{GAU42317.1; hypothetical protein TSUD_25430 [Trifolium subterraneum]}	{sp|P51407|RLA21_ARATH; 60S acidic ribosomal protein P2-1 OS=Arabidopsis thaliana GN=RPP2A PE=2 SV=2}	{cam:101489622; K02943 RP-LP2, RPLP2 large subunit ribosomal protein LP2 - ko03010; Genetic Information Processing; Translation; Ribosome}	{At2g27720; KOG3449 60S acidic ribosomal protein P2 J Translation, ribosomal structure and biogenesis ;}	{GO:0005840; ribosome; cellular_component GO:0006414; translational elongation; biological_process GO:0005622; intracellular; cellular_component GO:0003735; structural constituent of ribosome; molecular_function}	{XM_013612574.1; Medicago truncatula 60S acidic ribosomal protein mRNA}	{PF00428:60s Acidic ribosomal protein}
i0_HQ_c121550/f27p6/858	{XP_004486054.1; PREDICTED: 40S ribosomal protein S5-like [Cicer arietinum]}	{sp|O65731|RS5_CICAR; 40S ribosomal protein S5 (Fragment) OS=Cicer arietinum GN=RPS5 PE=2 SV=1}	{cam:101495809; K02989 RP-S5e, RPS5 small subunit ribosomal protein S5e - ko03010; Genetic Information Processing; Translation; Ribosome}	{At2g37270; KOG3291 Ribosomal protein S7 J Translation, ribosomal structure and biogenesis ;}	{NA}	{XM_013594857.1; Medicago truncatula 40S ribosomal protein S5-2 mRNA}	{NA}
i0_HQ_c121556/f19p4/378	{NA}	{NA}	{NA}	{NA}	{NA}	{KJ476730.1; Trifolium meduseum chloroplast, complete genome}	{NA}
i0_HQ_c121557/f4p2/438	{NA}	{NA}	{NA}	{NA}	{NA}	{NA}	{NA}
i0_HQ_c121560/f8p2/563	{GAU20870.1; hypothetical protein TSUD_120620 [Trifolium subterraneum]}	{sp|Q9FLN4|RK27_ARATH; 50S ribosomal protein L27, chloroplastic OS=Arabidopsis thaliana GN=RPL27 PE=2 SV=1}	{gmx:100815200; K02899 RP-L27, MRPL27, rpmA large subunit ribosomal protein L27 - ko03010; Genetic Information Processing; Translation; Ribosome}	{At5g40950; KOG4600 Mitochondrial ribosomal protein MRP7 (L2) J Translation, ribosomal structure and biogenesis ;}	{GO:0006412; translation; biological_process GO:0003735; structural constituent of ribosome; molecular_function GO:0005622; intracellular; cellular_component GO:0005840; ribosome; cellular_component}	{XM_003598719.2; Medicago truncatula 50S ribosomal protein L27 mRNA}	{PF01016:Ribosomal L27 protein}
i0_HQ_c12157/f2p1/370	{NA}	{NA}	{NA}	{NA}	{NA}	{XM_004501296.2; PREDICTED: Cicer arietinum ER membrane protein complex subunit 7 homolog (LOC101503634), mRNA}	{NA}
i0_HQ_c121571/f11p11/942	{Q9XQ94.1; RecName: Full=Glutamine synthetase leaf isozyme, chloroplastic; AltName: Full=GS2; AltName: Full=Glutamate--ammonia ligase; Flags: Precursor}	{sp|Q9XQ94|GLNA2_MEDSA; Glutamine synthetase leaf isozyme, chloroplastic OS=Medicago sativa GN=GS2 PE=2 SV=1}	{cam:101511058; K01915 glnA, GLUL glutamine synthetase 6.3.1.2 ko01230; Metabolism; Global and overview maps; Biosynthesis of amino acids | ko00630; Metabolism; Carbohydrate metabolism; Glyoxylate and dicarboxylate metabolism | ko00910; Metabolism; Energy metabolism; Nitrogen metabolism | ko00250; Metabolism; Amino acid metabolism; Alanine, aspartate and glutamate metabolism | ko00220; Metabolism…	{At5g35630; KOG0683 Glutamine synthetase E Amino acid transport and metabolism ;}	{GO:0006807; nitrogen compound metabolic process; biological_process GO:0004356; glutamate-ammonia ligase activity; molecular_function}	{XM_013607253.1; Medicago truncatula glutamine synthetase domain protein mRNA}	{PF00120:Glutamine synthetase, catalytic domain}
i0_HQ_c121572/f7p5/681	{GAU17426.1; hypothetical protein TSUD_233030 [Trifolium subterraneum]}	{NA}	{gmx:100780194; - - - - -}	{NA}	{GO:0015986; ATP synthesis coupled proton transport; biological_process GO:0015979; photosynthesis; biological_process GO:0019898; extrinsic to membrane; cellular_component GO:0009523; photosystem II; cellular_component GO:0009654; oxygen evolving complex; cellular_component GO:0015078; hydrogen ion transmembrane transporter activity; molecular_function GO:0009405; pathogenesis; biological_proces…	{XM_003611805.2; Medicago truncatula hypothetical protein mRNA}	{PF00430:ATP synthase B/B' CF(0) PF12920:TcdA/TcdB pore forming domain PF05757:Oxygen evolving enhancer protein 3 (PsbQ)}
i0_HQ_c121573/f3p4/376	{NA}	{NA}	{NA}	{NA}	{NA}	{XM_013606749.1; Medicago truncatula filament-plant-like protein mRNA}	{NA}
i0_HQ_c121578/f7p5/928	{XP_003616815.1; leguminosin group485 secreted peptide [Medicago truncatula]}	{sp|Q07202|CORA_MEDSA; Cold and drought-regulated protein CORA OS=Medicago sativa GN=CORA PE=2 SV=1}	{lja:Lj0g3v0226079.1; - - - - -}	{NA}	{NA}	{NA}	{NA}
i0_HQ_c121579/f67p9/863	{GAU42588.1; hypothetical protein TSUD_303040 [Trifolium subterraneum]}	{sp|Q9SPB3|RL10_VITRI; 60S ribosomal protein L10 OS=Vitis riparia GN=RPL10 PE=2 SV=1}	{cam:101501241; K02866 RP-L10e, RPL10 large subunit ribosomal protein L10e - ko03010; Genetic Information Processing; Translation; Ribosome}	{At1g26910; KOG0857 60s ribosomal protein L10 J Translation, ribosomal structure and biogenesis ;}	{GO:0003735; structural constituent of ribosome; molecular_function GO:0006412; translation; biological_process GO:0005840; ribosome; cellular_component}	{XM_004502749.2; PREDICTED: Cicer arietinum 60S ribosomal protein L10 (LOC101501507), mRNA}	{PF00252:Ribosomal protein L16p/L10e}
i0_HQ_c121581/f3p7/722	{GAU18953.1; hypothetical protein TSUD_229440 [Trifolium subterraneum]}	{NA}	{var:108320904; - - - - -}	{NA}	{GO:0006950; response to stress; biological_process}	{XM_003610845.2; Medicago truncatula hydrogen peroxide induced protein, putative mRNA}	{PF03242:Late embryogenesis abundant protein}
i0_HQ_c121591/f11p7/715	{GAU20718.1; hypothetical protein TSUD_231320 [Trifolium subterraneum]}	{sp|P62302|RS13_SOYBN; 40S ribosomal protein S13 OS=Glycine max GN=RPS13 PE=2 SV=1}	{var:108333035; K02953 RP-S13e, RPS13 small subunit ribosomal protein S13e - ko03010; Genetic Information Processing; Translation; Ribosome}	{At4g00100; KOG0400 40S ribosomal protein S13 J Translation, ribosomal structure and biogenesis ;}	{GO:0005840; ribosome; cellular_component GO:0006412; translation; biological_process GO:0005622; intracellular; cellular_component GO:0003735; structural constituent of ribosome; molecular_function}	{XM_003611200.2; Medicago truncatula cytoplasmic ribosomal protein S13 mRNA}	{PF00312:Ribosomal protein S15 PF08069:Ribosomal S13/S15 N-terminal domain}
i0_HQ_c121606/f8p45/669	{GAU23175.1; hypothetical protein TSUD_306230 [Trifolium subterraneum]}	{sp|Q6AT26|CESA1_ORYSJ; Probable cellulose synthase A catalytic subunit 1 [UDP-forming] OS=Oryza sativa subsp. japonica GN=CESA1 PE=2 SV=1}	{egr:104437051; K10999 CESA cellulose synthase A 2.4.1.12 -}	{NA}	{GO:0030244; cellulose biosynthetic process; biological_process GO:0016760; cellulose synthase (UDP-forming) activity; molecular_function GO:0016020; membrane; cellular_component}	{XM_004501256.2; PREDICTED: Cicer arietinum cellulose synthase A catalytic subunit 1 [UDP-forming] (LOC101491253), mRNA}	{PF03552:Cellulose synthase}
i0_HQ_c121615/f4p1/411	{XP_013448898.1; transmembrane protein, putative [Medicago truncatula]}	{NA}	{pvu:PHAVU_008G118700g; - - - - -}	{NA}	{NA}	{XM_013593444.1; Medicago truncatula transmembrane protein, putative mRNA}	{NA}
i0_HQ_c121628/f20p1/697	{XP_017405472.1; PREDICTED: 60S ribosomal protein L17-2 [Vigna angularis]}	{sp|P51413|RL172_ARATH; 60S ribosomal protein L17-2 OS=Arabidopsis thaliana GN=RPL17B PE=2 SV=2}	{var:108318987; K02880 RP-L17e, RPL17 large subunit ribosomal protein L17e - ko03010; Genetic Information Processing; Translation; Ribosome}	{At1g67430; KOG3353 60S ribosomal protein L22 J Translation, ribosomal structure and biogenesis ;}	{GO:0005840; ribosome; cellular_component GO:0003735; structural constituent of ribosome; molecular_function GO:0006412; translation; biological_process}	{XM_013591108.1; Medicago truncatula 60S ribosomal protein L17A mRNA}	{PF00237:Ribosomal protein L22p/L17e}
i0_HQ_c121630/f17p0/516	{XP_013468167.1; hypothetical protein MTR_1g063360 [Medicago truncatula]}	{NA}	{cam:101512076; - - - - -}	{NA}	{NA}	{XM_004497474.2; PREDICTED: Cicer arietinum uncharacterized LOC101512076 (LOC101512076), mRNA}	{NA}
i0_HQ_c121635/f5p1/577	{GAU51072.1; hypothetical protein TSUD_13170 [Trifolium subterraneum]}	{sp|Q9FKG2|EF107_ARATH; Ethylene-responsive transcription factor ERF107 OS=Arabidopsis thaliana GN=ERF107 PE=2 SV=1}	{cam:101505675; - - - - -}	{NA}	{GO:0006355; regulation of transcription, DNA-dependent; biological_process GO:0003700; sequence-specific DNA binding transcription factor activity; molecular_function}	{XM_003589802.2; Medicago truncatula ethylene response factor mRNA}	{PF00847:AP2 domain}
[truncated: 64,728 more rows]
