# Supplementary material for: Analysis of transcripts and splice isoforms in red clover (Trifolium pratense L.) by single-molecule long-read sequencing
Source: BMC Plant Biol. 2018 Nov 26;18:300. doi: 10.1186/s12870-018-1534-8 (PMC6258457; doi:10.1186/s12870-018-1534-8)
Supplement: Supplementary file 7 — Table S5. Exon number of mRNAs and lncRNAs from Iso-Seq. (XLSX 1677 kb) [file 12870_2018_1534_MOESM7_ESM.xlsx]

## Sheet: Red_Clover.isoform.stat
Table S5. Exon number of mRNAs and lncRNAs from Iso-Seq
transcript_id	gene_id	type	length	exon_number
Tp57577_TGAC_v2_gene30511_novel01	Tp57577_TGAC_v2_gene30511	mRNA	672	1
Tp57577_TGAC_v2_mRNA5140	Tp57577_TGAC_v2_gene4970	mRNA	743	1
Tp57577_TGAC_v2_gene5828_novel01	Tp57577_TGAC_v2_gene5828	mRNA	455	1
Tp57577_TGAC_v2_gene6176_novel01	Tp57577_TGAC_v2_gene6176	mRNA	713	1
Tp57577_TGAC_v2_gene20538_novel01	Tp57577_TGAC_v2_gene20538	mRNA	422	1
Tp57577_TGAC_v2_gene17085_novel02	Tp57577_TGAC_v2_gene17085	mRNA	593	1
Tp57577_TGAC_v2_gene15073_novel01	Tp57577_TGAC_v2_gene15073	mRNA	474	1
Tp57577_TGAC_v2_gene6370_novel04	Tp57577_TGAC_v2_gene6370	mRNA	415	1
Tp57577_TGAC_v2_gene17097_novel01	Tp57577_TGAC_v2_gene17097	mRNA	1913	1
Tp57577_TGAC_v2_gene30601_novel01	Tp57577_TGAC_v2_gene30601	mRNA	3001	1
Tp57577_TGAC_v2_gene12554_novel03	Tp57577_TGAC_v2_gene12554	mRNA	351	1
Tp57577_TGAC_v2_gene5625_novel02	Tp57577_TGAC_v2_gene5625	mRNA	793	1
Tp57577_TGAC_v2_gene6037_novel03	Tp57577_TGAC_v2_gene6037	mRNA	457	1
Tp57577_TGAC_v2_gene20156_novel02	Tp57577_TGAC_v2_gene20156	mRNA	2092	1
Tp57577_TGAC_v2_gene9621_novel05	Tp57577_TGAC_v2_gene9621	mRNA	406	1
Tp57577_TGAC_v2_mRNA20064	Tp57577_TGAC_v2_gene19392	mRNA	712	1
Tp57577_TGAC_v2_gene34399_novel01	Tp57577_TGAC_v2_gene34399	mRNA	593	1
Tp57577_TGAC_v2_gene29822_novel02	Tp57577_TGAC_v2_gene29822	mRNA	352	1
Tp57577_TGAC_v2_gene32231_novel01	Tp57577_TGAC_v2_gene32231	mRNA	673	1
Tp57577_TGAC_v2_gene26145_novel02	Tp57577_TGAC_v2_gene26145	mRNA	293	1
Tp57577_TGAC_v2_mRNA5525	Tp57577_TGAC_v2_gene5343	mRNA	885	1
Tp57577_TGAC_v2_gene17537_novel01	Tp57577_TGAC_v2_gene17537	mRNA	707	1
Tp57577_TGAC_v2_gene32690_novel02	Tp57577_TGAC_v2_gene32690	mRNA	781	1
Tp57577_TGAC_v2_gene33682_novel01	Tp57577_TGAC_v2_gene33682	mRNA	508	1
Novelgene0463_novel01	Novelgene0463	mRNA	2106	1
Tp57577_TGAC_v2_mRNA39815	Tp57577_TGAC_v2_gene38514	mRNA	2231	1
Tp57577_TGAC_v2_gene20572_novel05	Tp57577_TGAC_v2_gene20572	mRNA	2706	1
Tp57577_TGAC_v2_gene15034_novel01	Tp57577_TGAC_v2_gene15034	mRNA	427	1
Tp57577_TGAC_v2_mRNA8764	Tp57577_TGAC_v2_gene8481	mRNA	1241	1
Tp57577_TGAC_v2_gene8953_novel01	Tp57577_TGAC_v2_gene8953	mRNA	727	1
Tp57577_TGAC_v2_mRNA17785	Tp57577_TGAC_v2_gene17187	mRNA	513	1
Tp57577_TGAC_v2_gene12570_novel02	Tp57577_TGAC_v2_gene12570	mRNA	1025	1
Novelgene1235_novel01	Novelgene1235	mRNA	4089	1
Tp57577_TGAC_v2_mRNA9618	Tp57577_TGAC_v2_gene9309	mRNA	2020	1
Tp57577_TGAC_v2_gene28532_novel01	Tp57577_TGAC_v2_gene28532	mRNA	674	1
Tp57577_TGAC_v2_mRNA27125	Tp57577_TGAC_v2_gene26229	mRNA	711	1
Tp57577_TGAC_v2_gene22881_novel01	Tp57577_TGAC_v2_gene22881	mRNA	849	1
Tp57577_TGAC_v2_mRNA23450	Tp57577_TGAC_v2_gene22675	mRNA	4227	1
Tp57577_TGAC_v2_mRNA24410	Tp57577_TGAC_v2_gene23599	mRNA	2318	1
Tp57577_TGAC_v2_gene37004_novel01	Tp57577_TGAC_v2_gene37004	mRNA	375	1
Tp57577_TGAC_v2_gene30549_novel04	Tp57577_TGAC_v2_gene30549	mRNA	320	1
Novelgene0256_novel01	Novelgene0256	mRNA	417	1
Tp57577_TGAC_v2_gene29726_novel01	Tp57577_TGAC_v2_gene29726	mRNA	2057	1
Tp57577_TGAC_v2_mRNA31986	Tp57577_TGAC_v2_gene30941	mRNA	733	1
Novelgene0155_novel01	Novelgene0155	mRNA	2609	1
Tp57577_TGAC_v2_gene15848_novel01	Tp57577_TGAC_v2_gene15848	mRNA	1944	1
Tp57577_TGAC_v2_gene31805_novel01	Tp57577_TGAC_v2_gene31805	mRNA	589	1
Novelgene0624_novel01	Novelgene0624	mRNA	615	1
Tp57577_TGAC_v2_gene26967_novel01	Tp57577_TGAC_v2_gene26967	mRNA	570	1
Tp57577_TGAC_v2_gene21720_novel02	Tp57577_TGAC_v2_gene21720	mRNA	1465	1
Tp57577_TGAC_v2_gene28708_novel01	Tp57577_TGAC_v2_gene28708	mRNA	316	1
Tp57577_TGAC_v2_gene1273_novel02	Tp57577_TGAC_v2_gene1273	mRNA	3337	1
Tp57577_TGAC_v2_gene9486_novel02	Tp57577_TGAC_v2_gene9486	mRNA	664	1
Tp57577_TGAC_v2_mRNA31036	Tp57577_TGAC_v2_gene30012	mRNA	1369	1
Tp57577_TGAC_v2_gene21738_novel01	Tp57577_TGAC_v2_gene21738	mRNA	437	1
Tp57577_TGAC_v2_gene38405_novel01	Tp57577_TGAC_v2_gene38405	mRNA	546	1
Tp57577_TGAC_v2_gene22675_novel01	Tp57577_TGAC_v2_gene22675	mRNA	2262	1
Tp57577_TGAC_v2_gene1450_novel02	Tp57577_TGAC_v2_gene1450	mRNA	371	1
Novelgene0214_novel01	Novelgene0214	mRNA	2676	1
Tp57577_TGAC_v2_gene19397_novel02	Tp57577_TGAC_v2_gene19397	mRNA	1620	1
Tp57577_TGAC_v2_gene38917_novel01	Tp57577_TGAC_v2_gene38917	mRNA	393	1
Tp57577_TGAC_v2_gene30206_novel06	Tp57577_TGAC_v2_gene30206	mRNA	495	1
Novelgene0454_novel01	Novelgene0454	mRNA	889	1
Tp57577_TGAC_v2_gene4014_novel01	Tp57577_TGAC_v2_gene4014	mRNA	346	1
Novelgene0119_novel01	Novelgene0119	mRNA	516	1
Tp57577_TGAC_v2_gene14744_novel03	Tp57577_TGAC_v2_gene14744	mRNA	317	1
Tp57577_TGAC_v2_gene15385_novel03	Tp57577_TGAC_v2_gene15385	mRNA	438	1
Novelgene0705_novel01	Novelgene0705	mRNA	685	1
Tp57577_TGAC_v2_gene5264_novel01	Tp57577_TGAC_v2_gene5264	mRNA	631	1
Tp57577_TGAC_v2_gene25077_novel02	Tp57577_TGAC_v2_gene25077	mRNA	512	1
Tp57577_TGAC_v2_gene6966_novel01	Tp57577_TGAC_v2_gene6966	mRNA	702	1
Tp57577_TGAC_v2_mRNA11842	Tp57577_TGAC_v2_gene11470	mRNA	642	1
Tp57577_TGAC_v2_gene12407_novel02	Tp57577_TGAC_v2_gene12407	mRNA	541	1
Tp57577_TGAC_v2_gene5393_novel02	Tp57577_TGAC_v2_gene5393	mRNA	312	1
Tp57577_TGAC_v2_gene4423_novel01	Tp57577_TGAC_v2_gene4423	mRNA	527	1
Tp57577_TGAC_v2_gene16209_novel03	Tp57577_TGAC_v2_gene16209	mRNA	1352	1
Tp57577_TGAC_v2_gene38993_novel02	Tp57577_TGAC_v2_gene38993	mRNA	693	1
Tp57577_TGAC_v2_gene4532_novel03	Tp57577_TGAC_v2_gene4532	mRNA	605	1
Tp57577_TGAC_v2_gene8169_novel01	Tp57577_TGAC_v2_gene8169	mRNA	379	1
Tp57577_TGAC_v2_gene12224_novel02	Tp57577_TGAC_v2_gene12224	mRNA	4014	1
Tp57577_TGAC_v2_gene23304_novel02	Tp57577_TGAC_v2_gene23304	mRNA	420	1
Novelgene1141_novel01	Novelgene1141	mRNA	761	1
Tp57577_TGAC_v2_mRNA40167	Tp57577_TGAC_v2_gene38854	mRNA	560	1
Tp57577_TGAC_v2_gene23737_novel01	Tp57577_TGAC_v2_gene23737	mRNA	2141	1
Tp57577_TGAC_v2_gene34635_novel02	Tp57577_TGAC_v2_gene34635	mRNA	813	1
Tp57577_TGAC_v2_gene37725_novel01	Tp57577_TGAC_v2_gene37725	mRNA	362	1
Tp57577_TGAC_v2_gene19973_novel01	Tp57577_TGAC_v2_gene19973	mRNA	1568	1
Tp57577_TGAC_v2_gene23130_novel01	Tp57577_TGAC_v2_gene23130	mRNA	969	1
Tp57577_TGAC_v2_mRNA39140	Tp57577_TGAC_v2_gene37861	mRNA	1846	1
Tp57577_TGAC_v2_gene24251_novel01	Tp57577_TGAC_v2_gene24251	mRNA	1161	1
Tp57577_TGAC_v2_gene27748_novel02	Tp57577_TGAC_v2_gene27748	mRNA	5991	1
Tp57577_TGAC_v2_gene33317_novel01	Tp57577_TGAC_v2_gene33317	mRNA	602	1
Tp57577_TGAC_v2_gene32802_novel01	Tp57577_TGAC_v2_gene32802	mRNA	895	1
Tp57577_TGAC_v2_gene9264_novel02	Tp57577_TGAC_v2_gene9264	mRNA	1360	1
Tp57577_TGAC_v2_gene30685_novel01	Tp57577_TGAC_v2_gene30685	mRNA	304	1
Tp57577_TGAC_v2_gene31255_novel01	Tp57577_TGAC_v2_gene31255	mRNA	430	1
Tp57577_TGAC_v2_gene12682_novel05	Tp57577_TGAC_v2_gene12682	mRNA	1101	1
Tp57577_TGAC_v2_gene14024_novel01	Tp57577_TGAC_v2_gene14024	mRNA	665	1
Tp57577_TGAC_v2_gene13988_novel04	Tp57577_TGAC_v2_gene13988	mRNA	409	1
Tp57577_TGAC_v2_gene11658_novel01	Tp57577_TGAC_v2_gene11658	mRNA	440	1
Tp57577_TGAC_v2_gene33610_novel01	Tp57577_TGAC_v2_gene33610	mRNA	809	1
Tp57577_TGAC_v2_gene893_novel01	Tp57577_TGAC_v2_gene893	mRNA	871	1
Tp57577_TGAC_v2_gene6235_novel01	Tp57577_TGAC_v2_gene6235	mRNA	2828	1
Tp57577_TGAC_v2_mRNA14040	Tp57577_TGAC_v2_gene13587	mRNA	2412	1
Tp57577_TGAC_v2_gene29105_novel01	Tp57577_TGAC_v2_gene29105	mRNA	3441	1
Tp57577_TGAC_v2_gene34308_novel04	Tp57577_TGAC_v2_gene34308	mRNA	1687	1
Tp57577_TGAC_v2_mRNA15459	Tp57577_TGAC_v2_gene14960	mRNA	2220	1
Tp57577_TGAC_v2_gene13301_novel22	Tp57577_TGAC_v2_gene13301	mRNA	552	1
Tp57577_TGAC_v2_mRNA31006	Tp57577_TGAC_v2_gene29982	mRNA	1861	1
Tp57577_TGAC_v2_mRNA18656	Tp57577_TGAC_v2_gene18029	mRNA	1419	1
Tp57577_TGAC_v2_mRNA15918	Tp57577_TGAC_v2_gene15400	mRNA	1053	1
Tp57577_TGAC_v2_gene33896_novel02	Tp57577_TGAC_v2_gene33896	mRNA	2045	1
Tp57577_TGAC_v2_gene35202_novel02	Tp57577_TGAC_v2_gene35202	mRNA	630	1
Tp57577_TGAC_v2_gene12189_novel02	Tp57577_TGAC_v2_gene12189	mRNA	828	1
Tp57577_TGAC_v2_gene26456_novel01	Tp57577_TGAC_v2_gene26456	mRNA	449	1
Tp57577_TGAC_v2_gene4651_novel01	Tp57577_TGAC_v2_gene4651	mRNA	1058	1
Tp57577_TGAC_v2_gene5435_novel01	Tp57577_TGAC_v2_gene5435	mRNA	619	1
Tp57577_TGAC_v2_gene32215_novel01	Tp57577_TGAC_v2_gene32215	mRNA	419	1
Novelgene0981_novel01	Novelgene0981	mRNA	2113	1
Tp57577_TGAC_v2_mRNA1608	Tp57577_TGAC_v2_gene1581	mRNA	1008	1
Tp57577_TGAC_v2_gene3281_novel02	Tp57577_TGAC_v2_gene3281	mRNA	428	1
Tp57577_TGAC_v2_gene12379_novel01	Tp57577_TGAC_v2_gene12379	mRNA	428	1
Tp57577_TGAC_v2_gene9601_novel02	Tp57577_TGAC_v2_gene9601	mRNA	2685	1
Tp57577_TGAC_v2_mRNA7278	Tp57577_TGAC_v2_gene7029	mRNA	652	1
Tp57577_TGAC_v2_gene31048_novel03	Tp57577_TGAC_v2_gene31048	mRNA	464	1
Tp57577_TGAC_v2_mRNA35399	Tp57577_TGAC_v2_gene34239	mRNA	1235	1
Tp57577_TGAC_v2_gene32398_novel02	Tp57577_TGAC_v2_gene32398	mRNA	839	1
Tp57577_TGAC_v2_mRNA35470	Tp57577_TGAC_v2_gene34307	mRNA	1360	1
Tp57577_TGAC_v2_gene39185_novel05	Tp57577_TGAC_v2_gene39185	mRNA	2044	1
Tp57577_TGAC_v2_mRNA36706	Tp57577_TGAC_v2_gene35502	mRNA	1156	1
Tp57577_TGAC_v2_mRNA17566	Tp57577_TGAC_v2_gene16980	mRNA	993	1
Tp57577_TGAC_v2_gene38854_novel01	Tp57577_TGAC_v2_gene38854	mRNA	770	1
Tp57577_TGAC_v2_gene3527_novel11	Tp57577_TGAC_v2_gene3527	mRNA	654	1
Tp57577_TGAC_v2_gene8814_novel01	Tp57577_TGAC_v2_gene8814	mRNA	426	1
Tp57577_TGAC_v2_mRNA3529	Tp57577_TGAC_v2_gene3431	mRNA	1029	1
Novelgene1580_novel01	Novelgene1580	mRNA	598	1
Tp57577_TGAC_v2_gene30250_novel01	Tp57577_TGAC_v2_gene30250	mRNA	583	1
Tp57577_TGAC_v2_gene38385_novel03	Tp57577_TGAC_v2_gene38385	mRNA	751	1
Tp57577_TGAC_v2_gene24797_novel01	Tp57577_TGAC_v2_gene24797	mRNA	1030	1
Tp57577_TGAC_v2_gene18266_novel03	Tp57577_TGAC_v2_gene18266	mRNA	1977	1
Tp57577_TGAC_v2_gene34760_novel02	Tp57577_TGAC_v2_gene34760	mRNA	784	1
Tp57577_TGAC_v2_gene24497_novel04	Tp57577_TGAC_v2_gene24497	mRNA	1668	1
Tp57577_TGAC_v2_gene23985_novel02	Tp57577_TGAC_v2_gene23985	mRNA	334	1
Tp57577_TGAC_v2_gene12949_novel04	Tp57577_TGAC_v2_gene12949	mRNA	3175	1
Tp57577_TGAC_v2_gene11655_novel22	Tp57577_TGAC_v2_gene11655	mRNA	900	1
Tp57577_TGAC_v2_gene14961_novel01	Tp57577_TGAC_v2_gene14961	mRNA	3115	1
Tp57577_TGAC_v2_gene11739_novel03	Tp57577_TGAC_v2_gene11739	mRNA	476	1
Tp57577_TGAC_v2_mRNA6010	Tp57577_TGAC_v2_gene5811	mRNA	865	1
Tp57577_TGAC_v2_gene1323_novel02	Tp57577_TGAC_v2_gene1323	mRNA	1107	1
Tp57577_TGAC_v2_gene9207_novel03	Tp57577_TGAC_v2_gene9207	mRNA	596	1
Tp57577_TGAC_v2_gene1569_novel01	Tp57577_TGAC_v2_gene1569	mRNA	631	1
Tp57577_TGAC_v2_mRNA19713	Tp57577_TGAC_v2_gene19055	mRNA	683	1
Tp57577_TGAC_v2_gene1126_novel01	Tp57577_TGAC_v2_gene1126	mRNA	1313	1
Tp57577_TGAC_v2_gene38855_novel06	Tp57577_TGAC_v2_gene38855	mRNA	804	1
Tp57577_TGAC_v2_gene4083_novel01	Tp57577_TGAC_v2_gene4083	mRNA	2041	1
Tp57577_TGAC_v2_gene34176_novel01	Tp57577_TGAC_v2_gene34176	mRNA	4846	1
Tp57577_TGAC_v2_gene6950_novel01	Tp57577_TGAC_v2_gene6950	mRNA	2289	1
Tp57577_TGAC_v2_gene2845_novel02	Tp57577_TGAC_v2_gene2845	mRNA	779	1
Tp57577_TGAC_v2_mRNA9301	Tp57577_TGAC_v2_gene8999	mRNA	1298	1
Tp57577_TGAC_v2_gene17292_novel02	Tp57577_TGAC_v2_gene17292	mRNA	392	1
Tp57577_TGAC_v2_gene1580_novel01	Tp57577_TGAC_v2_gene1580	mRNA	1330	1
Tp57577_TGAC_v2_mRNA35912	Tp57577_TGAC_v2_gene34731	mRNA	2022	1
Tp57577_TGAC_v2_gene17245_novel01	Tp57577_TGAC_v2_gene17245	mRNA	1105	1
Tp57577_TGAC_v2_gene5928_novel02	Tp57577_TGAC_v2_gene5928	mRNA	456	1
Tp57577_TGAC_v2_gene5206_novel01	Tp57577_TGAC_v2_gene5206	mRNA	561	1
Tp57577_TGAC_v2_gene37246_novel03	Tp57577_TGAC_v2_gene37246	mRNA	653	1
Tp57577_TGAC_v2_gene6410_novel01	Tp57577_TGAC_v2_gene6410	mRNA	983	1
Tp57577_TGAC_v2_gene8175_novel03	Tp57577_TGAC_v2_gene8175	mRNA	4462	1
Tp57577_TGAC_v2_mRNA20165	Tp57577_TGAC_v2_gene19490	mRNA	805	1
Tp57577_TGAC_v2_gene26431_novel02	Tp57577_TGAC_v2_gene26431	mRNA	549	1
Tp57577_TGAC_v2_mRNA20367	Tp57577_TGAC_v2_gene19687	mRNA	801	1
Tp57577_TGAC_v2_gene34157_novel02	Tp57577_TGAC_v2_gene34157	mRNA	1566	1
Tp57577_TGAC_v2_mRNA7217	Tp57577_TGAC_v2_gene6971	mRNA	1120	1
Tp57577_TGAC_v2_gene23970_novel01	Tp57577_TGAC_v2_gene23970	mRNA	678	1
Tp57577_TGAC_v2_gene37911_novel11	Tp57577_TGAC_v2_gene37911	mRNA	466	1
Tp57577_TGAC_v2_gene12255_novel03	Tp57577_TGAC_v2_gene12255	mRNA	339	1
Tp57577_TGAC_v2_gene32271_novel01	Tp57577_TGAC_v2_gene32271	mRNA	848	1
Tp57577_TGAC_v2_gene21257_novel01	Tp57577_TGAC_v2_gene21257	mRNA	1479	1
Tp57577_TGAC_v2_gene6736_novel01	Tp57577_TGAC_v2_gene6736	mRNA	569	1
Tp57577_TGAC_v2_gene12726_novel01	Tp57577_TGAC_v2_gene12726	mRNA	1489	1
Novelgene0458_novel01	Novelgene0458	mRNA	376	1
Tp57577_TGAC_v2_gene16488_novel02	Tp57577_TGAC_v2_gene16488	mRNA	1934	1
Tp57577_TGAC_v2_mRNA28207	Tp57577_TGAC_v2_gene27271	mRNA	594	1
Tp57577_TGAC_v2_gene22426_novel01	Tp57577_TGAC_v2_gene22426	mRNA	559	1
Tp57577_TGAC_v2_gene19080_novel01	Tp57577_TGAC_v2_gene19080	mRNA	1869	1
Tp57577_TGAC_v2_gene39061_novel03	Tp57577_TGAC_v2_gene39061	mRNA	279	1
Tp57577_TGAC_v2_mRNA9021	Tp57577_TGAC_v2_gene8727	mRNA	1011	1
Tp57577_TGAC_v2_gene13695_novel01	Tp57577_TGAC_v2_gene13695	mRNA	478	1
Tp57577_TGAC_v2_gene7007_novel01	Tp57577_TGAC_v2_gene7007	mRNA	1515	1
Tp57577_TGAC_v2_gene1959_novel01	Tp57577_TGAC_v2_gene1959	mRNA	1085	1
Novelgene1242_novel02	Novelgene1242	mRNA	527	1
Tp57577_TGAC_v2_gene2311_novel01	Tp57577_TGAC_v2_gene2311	mRNA	487	1
Tp57577_TGAC_v2_gene26592_novel03	Tp57577_TGAC_v2_gene26592	mRNA	658	1
Tp57577_TGAC_v2_mRNA21552	Tp57577_TGAC_v2_gene20840	mRNA	1134	1
Tp57577_TGAC_v2_gene32293_novel01	Tp57577_TGAC_v2_gene32293	mRNA	791	1
Tp57577_TGAC_v2_gene8508_novel03	Tp57577_TGAC_v2_gene8508	mRNA	667	1
Tp57577_TGAC_v2_gene24925_novel07	Tp57577_TGAC_v2_gene24925	mRNA	547	1
Tp57577_TGAC_v2_gene36625_novel01	Tp57577_TGAC_v2_gene36625	mRNA	1039	1
Tp57577_TGAC_v2_gene14628_novel02	Tp57577_TGAC_v2_gene14628	mRNA	2469	1
Tp57577_TGAC_v2_gene16856_novel01	Tp57577_TGAC_v2_gene16856	mRNA	958	1
Tp57577_TGAC_v2_gene17912_novel01	Tp57577_TGAC_v2_gene17912	mRNA	476	1
Tp57577_TGAC_v2_gene21406_novel01	Tp57577_TGAC_v2_gene21406	mRNA	755	1
Tp57577_TGAC_v2_gene20698_novel01	Tp57577_TGAC_v2_gene20698	mRNA	480	1
Tp57577_TGAC_v2_gene38551_novel01	Tp57577_TGAC_v2_gene38551	mRNA	489	1
Tp57577_TGAC_v2_gene9042_novel05	Tp57577_TGAC_v2_gene9042	mRNA	6473	1
Tp57577_TGAC_v2_gene36813_novel01	Tp57577_TGAC_v2_gene36813	mRNA	339	1
Tp57577_TGAC_v2_gene21978_novel01	Tp57577_TGAC_v2_gene21978	mRNA	359	1
Tp57577_TGAC_v2_gene4844_novel05	Tp57577_TGAC_v2_gene4844	mRNA	1002	1
Tp57577_TGAC_v2_mRNA23410	Tp57577_TGAC_v2_gene22635	mRNA	1038	1
Tp57577_TGAC_v2_gene16159_novel01	Tp57577_TGAC_v2_gene16159	mRNA	674	1
Tp57577_TGAC_v2_gene39229_novel02	Tp57577_TGAC_v2_gene39229	mRNA	2323	1
Tp57577_TGAC_v2_mRNA8330	Tp57577_TGAC_v2_gene8056	mRNA	781	1
Tp57577_TGAC_v2_gene13013_novel13	Tp57577_TGAC_v2_gene13013	mRNA	753	1
Tp57577_TGAC_v2_mRNA19794	Tp57577_TGAC_v2_gene19133	mRNA	924	1
Tp57577_TGAC_v2_mRNA33711	Tp57577_TGAC_v2_gene32612	mRNA	567	1
Tp57577_TGAC_v2_gene12687_novel02	Tp57577_TGAC_v2_gene12687	mRNA	505	1
Tp57577_TGAC_v2_gene17953_novel04	Tp57577_TGAC_v2_gene17953	mRNA	721	1
Tp57577_TGAC_v2_gene25977_novel01	Tp57577_TGAC_v2_gene25977	mRNA	1426	1
Tp57577_TGAC_v2_gene1943_novel06	Tp57577_TGAC_v2_gene1943	mRNA	1119	1
Tp57577_TGAC_v2_gene4668_novel01	Tp57577_TGAC_v2_gene4668	mRNA	1723	1
Novelgene0475_novel01	Novelgene0475	mRNA	910	1
Novelgene0296_novel01	Novelgene0296	mRNA	3149	1
Tp57577_TGAC_v2_gene3634_novel01	Tp57577_TGAC_v2_gene3634	mRNA	917	1
Tp57577_TGAC_v2_gene19256_novel01	Tp57577_TGAC_v2_gene19256	mRNA	1998	1
Tp57577_TGAC_v2_gene13468_novel02	Tp57577_TGAC_v2_gene13468	mRNA	671	1
Tp57577_TGAC_v2_mRNA41332	Tp57577_TGAC_v2_gene39983	mRNA	1472	1
Tp57577_TGAC_v2_gene24152_novel01	Tp57577_TGAC_v2_gene24152	mRNA	1116	1
Tp57577_TGAC_v2_mRNA27548	Tp57577_TGAC_v2_gene26637	mRNA	632	1
Tp57577_TGAC_v2_gene19896_novel01	Tp57577_TGAC_v2_gene19896	mRNA	3202	1
Tp57577_TGAC_v2_gene37318_novel02	Tp57577_TGAC_v2_gene37318	mRNA	434	1
Tp57577_TGAC_v2_mRNA11560	Tp57577_TGAC_v2_gene11198	mRNA	1901	1
Tp57577_TGAC_v2_gene32457_novel02	Tp57577_TGAC_v2_gene32457	mRNA	730	1
Tp57577_TGAC_v2_gene33633_novel17	Tp57577_TGAC_v2_gene33633	mRNA	2501	1
Tp57577_TGAC_v2_gene4653_novel01	Tp57577_TGAC_v2_gene4653	mRNA	1039	1
Tp57577_TGAC_v2_gene12202_novel03	Tp57577_TGAC_v2_gene12202	mRNA	298	1
Tp57577_TGAC_v2_mRNA22254	Tp57577_TGAC_v2_gene21519	mRNA	432	1
Tp57577_TGAC_v2_mRNA27448	Tp57577_TGAC_v2_gene26541	mRNA	2991	1
Tp57577_TGAC_v2_mRNA25964	Tp57577_TGAC_v2_gene25106	mRNA	514	1
Tp57577_TGAC_v2_mRNA7667	Tp57577_TGAC_v2_gene7414	mRNA	273	1
Tp57577_TGAC_v2_gene26355_novel02	Tp57577_TGAC_v2_gene26355	mRNA	1047	1
Tp57577_TGAC_v2_gene33452_novel01	Tp57577_TGAC_v2_gene33452	mRNA	682	1
Tp57577_TGAC_v2_gene19505_novel02	Tp57577_TGAC_v2_gene19505	mRNA	383	1
Novelgene1103_novel01	Novelgene1103	mRNA	1499	1
Tp57577_TGAC_v2_gene25203_novel01	Tp57577_TGAC_v2_gene25203	mRNA	1163	1
Novelgene1244_novel01	Novelgene1244	mRNA	398	1
Tp57577_TGAC_v2_gene14818_novel02	Tp57577_TGAC_v2_gene14818	mRNA	428	1
Novelgene1277_novel02	Novelgene1277	mRNA	3176	1
Tp57577_TGAC_v2_gene30142_novel03	Tp57577_TGAC_v2_gene30142	mRNA	972	1
Novelgene0992_novel01	Novelgene0992	mRNA	2450	1
Tp57577_TGAC_v2_gene15671_novel01	Tp57577_TGAC_v2_gene15671	mRNA	588	1
Tp57577_TGAC_v2_gene30006_novel07	Tp57577_TGAC_v2_gene30006	mRNA	1493	1
Tp57577_TGAC_v2_gene5564_novel01	Tp57577_TGAC_v2_gene5564	mRNA	1203	1
Novelgene0088_novel01	Novelgene0088	mRNA	1214	1
Tp57577_TGAC_v2_mRNA9074	Tp57577_TGAC_v2_gene8777	mRNA	1578	1
Tp57577_TGAC_v2_gene21399_novel01	Tp57577_TGAC_v2_gene21399	mRNA	2487	1
Tp57577_TGAC_v2_mRNA1593	Tp57577_TGAC_v2_gene1569	mRNA	1534	1
Tp57577_TGAC_v2_mRNA31323	Tp57577_TGAC_v2_gene30297	mRNA	796	1
Tp57577_TGAC_v2_gene4376_novel01	Tp57577_TGAC_v2_gene4376	mRNA	669	1
Tp57577_TGAC_v2_gene13826_novel01	Tp57577_TGAC_v2_gene13826	mRNA	470	1
Tp57577_TGAC_v2_gene31517_novel01	Tp57577_TGAC_v2_gene31517	mRNA	502	1
Tp57577_TGAC_v2_gene12439_novel02	Tp57577_TGAC_v2_gene12439	mRNA	525	1
Tp57577_TGAC_v2_mRNA17774	Tp57577_TGAC_v2_gene17178	mRNA	893	1
Tp57577_TGAC_v2_gene31252_novel01	Tp57577_TGAC_v2_gene31252	mRNA	512	1
Tp57577_TGAC_v2_gene26373_novel04	Tp57577_TGAC_v2_gene26373	mRNA	339	1
Tp57577_TGAC_v2_gene37435_novel01	Tp57577_TGAC_v2_gene37435	mRNA	644	1
Tp57577_TGAC_v2_gene17509_novel04	Tp57577_TGAC_v2_gene17509	mRNA	817	1
Tp57577_TGAC_v2_gene14104_novel01	Tp57577_TGAC_v2_gene14104	mRNA	484	1
Tp57577_TGAC_v2_gene21154_novel03	Tp57577_TGAC_v2_gene21154	mRNA	686	1
Tp57577_TGAC_v2_mRNA25625	Tp57577_TGAC_v2_gene24774	mRNA	1412	1
Tp57577_TGAC_v2_gene26414_novel01	Tp57577_TGAC_v2_gene26414	mRNA	1477	1
Tp57577_TGAC_v2_gene38087_novel03	Tp57577_TGAC_v2_gene38087	mRNA	954	1
Tp57577_TGAC_v2_gene38044_novel01	Tp57577_TGAC_v2_gene38044	mRNA	731	1
Tp57577_TGAC_v2_mRNA23585	Tp57577_TGAC_v2_gene22803	mRNA	698	1
Tp57577_TGAC_v2_gene14234_novel03	Tp57577_TGAC_v2_gene14234	mRNA	1147	1
Tp57577_TGAC_v2_gene5005_novel02	Tp57577_TGAC_v2_gene5005	mRNA	523	1
Tp57577_TGAC_v2_gene5445_novel03	Tp57577_TGAC_v2_gene5445	mRNA	1419	1
Tp57577_TGAC_v2_gene36759_novel02	Tp57577_TGAC_v2_gene36759	mRNA	3278	1
Tp57577_TGAC_v2_gene18794_novel01	Tp57577_TGAC_v2_gene18794	mRNA	1315	1
Tp57577_TGAC_v2_gene38831_novel02	Tp57577_TGAC_v2_gene38831	mRNA	407	1
Tp57577_TGAC_v2_gene6865_novel02	Tp57577_TGAC_v2_gene6865	mRNA	335	1
Tp57577_TGAC_v2_gene2393_novel04	Tp57577_TGAC_v2_gene2393	mRNA	633	1
Tp57577_TGAC_v2_gene23886_novel01	Tp57577_TGAC_v2_gene23886	mRNA	1780	1
Tp57577_TGAC_v2_gene11632_novel04	Tp57577_TGAC_v2_gene11632	mRNA	853	1
Tp57577_TGAC_v2_gene26866_novel01	Tp57577_TGAC_v2_gene26866	mRNA	342	1
Tp57577_TGAC_v2_gene37271_novel01	Tp57577_TGAC_v2_gene37271	mRNA	489	1
Tp57577_TGAC_v2_gene19435_novel02	Tp57577_TGAC_v2_gene19435	mRNA	470	1
Tp57577_TGAC_v2_gene29065_novel01	Tp57577_TGAC_v2_gene29065	mRNA	384	1
Tp57577_TGAC_v2_gene8400_novel01	Tp57577_TGAC_v2_gene8400	mRNA	746	1
Tp57577_TGAC_v2_gene35887_novel01	Tp57577_TGAC_v2_gene35887	mRNA	367	1
Tp57577_TGAC_v2_mRNA18948	Tp57577_TGAC_v2_gene18309	mRNA	1674	1
Novelgene0849_novel01	Novelgene0849	mRNA	1390	1
Tp57577_TGAC_v2_gene14356_novel02	Tp57577_TGAC_v2_gene14356	mRNA	666	1
Tp57577_TGAC_v2_mRNA24153	Tp57577_TGAC_v2_gene23350	mRNA	1488	1
Tp57577_TGAC_v2_gene28177_novel01	Tp57577_TGAC_v2_gene28177	mRNA	451	1
Tp57577_TGAC_v2_mRNA16173	Tp57577_TGAC_v2_gene15645	mRNA	1003	1
Tp57577_TGAC_v2_gene2219_novel01	Tp57577_TGAC_v2_gene2219	mRNA	615	1
Tp57577_TGAC_v2_gene20625_novel02	Tp57577_TGAC_v2_gene20625	mRNA	536	1
Tp57577_TGAC_v2_gene6618_novel01	Tp57577_TGAC_v2_gene6618	mRNA	708	1
Tp57577_TGAC_v2_mRNA5152	Tp57577_TGAC_v2_gene4981	mRNA	1451	1
Tp57577_TGAC_v2_gene2722_novel01	Tp57577_TGAC_v2_gene2722	mRNA	629	1
Tp57577_TGAC_v2_gene38670_novel01	Tp57577_TGAC_v2_gene38670	mRNA	3008	1
Tp57577_TGAC_v2_gene5555_novel01	Tp57577_TGAC_v2_gene5555	mRNA	929	1
Tp57577_TGAC_v2_gene5812_novel02	Tp57577_TGAC_v2_gene5812	mRNA	425	1
Tp57577_TGAC_v2_gene15065_novel02	Tp57577_TGAC_v2_gene15065	mRNA	733	1
Tp57577_TGAC_v2_gene24385_novel01	Tp57577_TGAC_v2_gene24385	mRNA	1783	1
Tp57577_TGAC_v2_gene16625_novel02	Tp57577_TGAC_v2_gene16625	mRNA	429	1
Tp57577_TGAC_v2_gene26389_novel02	Tp57577_TGAC_v2_gene26389	mRNA	552	1
Tp57577_TGAC_v2_gene1187_novel02	Tp57577_TGAC_v2_gene1187	mRNA	1855	1
Tp57577_TGAC_v2_gene11481_novel02	Tp57577_TGAC_v2_gene11481	mRNA	680	1
Tp57577_TGAC_v2_gene22355_novel03	Tp57577_TGAC_v2_gene22355	mRNA	1480	1
Tp57577_TGAC_v2_mRNA21163	Tp57577_TGAC_v2_gene20457	mRNA	480	1
Tp57577_TGAC_v2_gene6408_novel02	Tp57577_TGAC_v2_gene6408	mRNA	650	1
Tp57577_TGAC_v2_mRNA14958	Tp57577_TGAC_v2_gene14476	mRNA	669	1
Tp57577_TGAC_v2_gene38629_novel01	Tp57577_TGAC_v2_gene38629	mRNA	921	1
Tp57577_TGAC_v2_gene19871_novel03	Tp57577_TGAC_v2_gene19871	mRNA	551	1
Tp57577_TGAC_v2_gene39544_novel01	Tp57577_TGAC_v2_gene39544	mRNA	367	1
Tp57577_TGAC_v2_gene648_novel01	Tp57577_TGAC_v2_gene648	mRNA	1505	1
Tp57577_TGAC_v2_mRNA34211	Tp57577_TGAC_v2_gene33098	mRNA	544	1
Novelgene0163_novel01	Novelgene0163	mRNA	1640	1
Tp57577_TGAC_v2_gene34151_novel02	Tp57577_TGAC_v2_gene34151	mRNA	1395	1
Tp57577_TGAC_v2_gene25729_novel02	Tp57577_TGAC_v2_gene25729	mRNA	409	1
Tp57577_TGAC_v2_gene25491_novel01	Tp57577_TGAC_v2_gene25491	mRNA	1576	1
Tp57577_TGAC_v2_mRNA12668	Tp57577_TGAC_v2_gene12270	mRNA	1613	1
Tp57577_TGAC_v2_mRNA26483	Tp57577_TGAC_v2_gene25607	mRNA	1066	1
Tp57577_TGAC_v2_gene35047_novel01	Tp57577_TGAC_v2_gene35047	mRNA	804	1
Novelgene0640_novel01	Novelgene0640	mRNA	1429	1
Tp57577_TGAC_v2_mRNA27062	Tp57577_TGAC_v2_gene26167	mRNA	1207	1
Tp57577_TGAC_v2_gene27099_novel01	Tp57577_TGAC_v2_gene27099	mRNA	483	1
Tp57577_TGAC_v2_gene6392_novel01	Tp57577_TGAC_v2_gene6392	mRNA	812	1
Tp57577_TGAC_v2_gene4809_novel02	Tp57577_TGAC_v2_gene4809	mRNA	1035	1
Tp57577_TGAC_v2_gene38515_novel04	Tp57577_TGAC_v2_gene38515	mRNA	336	1
Tp57577_TGAC_v2_gene11207_novel01	Tp57577_TGAC_v2_gene11207	mRNA	820	1
Tp57577_TGAC_v2_mRNA39885	Tp57577_TGAC_v2_gene38582	mRNA	1637	1
Tp57577_TGAC_v2_gene5808_novel03	Tp57577_TGAC_v2_gene5808	mRNA	349	1
Tp57577_TGAC_v2_mRNA13229	Tp57577_TGAC_v2_gene12811	mRNA	1630	1
Tp57577_TGAC_v2_gene4405_novel01	Tp57577_TGAC_v2_gene4405	mRNA	979	1
Tp57577_TGAC_v2_gene26962_novel03	Tp57577_TGAC_v2_gene26962	mRNA	899	1
Tp57577_TGAC_v2_gene12670_novel02	Tp57577_TGAC_v2_gene12670	mRNA	678	1
Tp57577_TGAC_v2_gene33327_novel02	Tp57577_TGAC_v2_gene33327	mRNA	546	1
Tp57577_TGAC_v2_gene5992_novel02	Tp57577_TGAC_v2_gene5992	mRNA	501	1
Tp57577_TGAC_v2_gene31856_novel01	Tp57577_TGAC_v2_gene31856	mRNA	662	1
Novelgene1442_novel01	Novelgene1442	mRNA	415	1
Tp57577_TGAC_v2_gene35201_novel04	Tp57577_TGAC_v2_gene35201	mRNA	1218	1
Tp57577_TGAC_v2_gene1945_novel02	Tp57577_TGAC_v2_gene1945	mRNA	1835	1
Tp57577_TGAC_v2_gene24333_novel01	Tp57577_TGAC_v2_gene24333	mRNA	798	1
Tp57577_TGAC_v2_mRNA31567	Tp57577_TGAC_v2_gene30532	mRNA	848	1
Tp57577_TGAC_v2_gene7945_novel06	Tp57577_TGAC_v2_gene7945	mRNA	1072	1
Tp57577_TGAC_v2_gene21040_novel01	Tp57577_TGAC_v2_gene21040	mRNA	608	1
Tp57577_TGAC_v2_mRNA17416	Tp57577_TGAC_v2_gene16833	mRNA	405	1
Tp57577_TGAC_v2_gene17783_novel02	Tp57577_TGAC_v2_gene17783	mRNA	1336	1
Tp57577_TGAC_v2_gene33224_novel01	Tp57577_TGAC_v2_gene33224	mRNA	678	1
Tp57577_TGAC_v2_gene18290_novel01	Tp57577_TGAC_v2_gene18290	mRNA	562	1
Tp57577_TGAC_v2_mRNA22243	Tp57577_TGAC_v2_gene21508	mRNA	244	1
Tp57577_TGAC_v2_gene32413_novel01	Tp57577_TGAC_v2_gene32413	mRNA	559	1
Tp57577_TGAC_v2_gene13794_novel01	Tp57577_TGAC_v2_gene13794	mRNA	2020	1
Tp57577_TGAC_v2_gene26883_novel01	Tp57577_TGAC_v2_gene26883	mRNA	605	1
Novelgene0186_novel01	Novelgene0186	mRNA	1649	1
Tp57577_TGAC_v2_gene26385_novel01	Tp57577_TGAC_v2_gene26385	mRNA	2467	1
Tp57577_TGAC_v2_gene20511_novel01	Tp57577_TGAC_v2_gene20511	mRNA	803	1
Tp57577_TGAC_v2_gene19853_novel01	Tp57577_TGAC_v2_gene19853	mRNA	1084	1
Tp57577_TGAC_v2_mRNA18011	Tp57577_TGAC_v2_gene17402	mRNA	1015	1
Tp57577_TGAC_v2_gene14355_novel04	Tp57577_TGAC_v2_gene14355	mRNA	450	1
Tp57577_TGAC_v2_gene34052_novel01	Tp57577_TGAC_v2_gene34052	mRNA	615	1
Tp57577_TGAC_v2_gene1037_novel02	Tp57577_TGAC_v2_gene1037	mRNA	361	1
Tp57577_TGAC_v2_gene22299_novel03	Tp57577_TGAC_v2_gene22299	mRNA	754	1
Tp57577_TGAC_v2_gene35012_novel01	Tp57577_TGAC_v2_gene35012	mRNA	587	1
Tp57577_TGAC_v2_gene12617_novel01	Tp57577_TGAC_v2_gene12617	mRNA	326	1
Tp57577_TGAC_v2_gene30739_novel01	Tp57577_TGAC_v2_gene30739	mRNA	714	1
Tp57577_TGAC_v2_gene33420_novel05	Tp57577_TGAC_v2_gene33420	mRNA	1630	1
Tp57577_TGAC_v2_gene28636_novel01	Tp57577_TGAC_v2_gene28636	mRNA	1031	1
Novelgene1495_novel01	Novelgene1495	mRNA	508	1
Tp57577_TGAC_v2_mRNA26938	Tp57577_TGAC_v2_gene26049	mRNA	2347	1
Tp57577_TGAC_v2_mRNA5582	Tp57577_TGAC_v2_gene5396	mRNA	635	1
Novelgene1007_novel01	Novelgene1007	mRNA	493	1
Tp57577_TGAC_v2_gene13090_novel01	Tp57577_TGAC_v2_gene13090	mRNA	668	1
Tp57577_TGAC_v2_mRNA6027	Tp57577_TGAC_v2_gene5828	mRNA	942	1
Tp57577_TGAC_v2_gene13797_novel02	Tp57577_TGAC_v2_gene13797	mRNA	1048	1
Tp57577_TGAC_v2_gene30504_novel01	Tp57577_TGAC_v2_gene30504	mRNA	467	1
Tp57577_TGAC_v2_gene15560_novel01	Tp57577_TGAC_v2_gene15560	mRNA	661	1
Tp57577_TGAC_v2_gene27611_novel01	Tp57577_TGAC_v2_gene27611	mRNA	960	1
Tp57577_TGAC_v2_mRNA294	Tp57577_TGAC_v2_gene293	mRNA	364	1
Tp57577_TGAC_v2_gene5262_novel01	Tp57577_TGAC_v2_gene5262	mRNA	884	1
Tp57577_TGAC_v2_gene30535_novel02	Tp57577_TGAC_v2_gene30535	mRNA	3427	1
Tp57577_TGAC_v2_gene27015_novel02	Tp57577_TGAC_v2_gene27015	mRNA	856	1
Tp57577_TGAC_v2_gene31798_novel02	Tp57577_TGAC_v2_gene31798	mRNA	561	1
Tp57577_TGAC_v2_gene36657_novel02	Tp57577_TGAC_v2_gene36657	mRNA	763	1
Tp57577_TGAC_v2_gene4668_novel02	Tp57577_TGAC_v2_gene4668	mRNA	563	1
Tp57577_TGAC_v2_gene9523_novel01	Tp57577_TGAC_v2_gene9523	mRNA	669	1
Tp57577_TGAC_v2_gene27508_novel03	Tp57577_TGAC_v2_gene27508	mRNA	431	1
Tp57577_TGAC_v2_gene5142_novel04	Tp57577_TGAC_v2_gene5142	mRNA	632	1
Tp57577_TGAC_v2_gene14936_novel02	Tp57577_TGAC_v2_gene14936	mRNA	2005	1
Tp57577_TGAC_v2_gene35429_novel01	Tp57577_TGAC_v2_gene35429	mRNA	535	1
Tp57577_TGAC_v2_gene80_novel01	Tp57577_TGAC_v2_gene80	mRNA	562	1
Tp57577_TGAC_v2_gene2218_novel18	Tp57577_TGAC_v2_gene2218	mRNA	489	1
Tp57577_TGAC_v2_gene32897_novel03	Tp57577_TGAC_v2_gene32897	mRNA	1235	1
Tp57577_TGAC_v2_gene25690_novel01	Tp57577_TGAC_v2_gene25690	mRNA	336	1
Tp57577_TGAC_v2_gene4336_novel01	Tp57577_TGAC_v2_gene4336	mRNA	3173	1
Tp57577_TGAC_v2_gene12765_novel01	Tp57577_TGAC_v2_gene12765	mRNA	657	1
Tp57577_TGAC_v2_gene8393_novel01	Tp57577_TGAC_v2_gene8393	mRNA	1381	1
Tp57577_TGAC_v2_gene6084_novel02	Tp57577_TGAC_v2_gene6084	mRNA	767	1
Novelgene0499_novel02	Novelgene0499	mRNA	1991	1
Tp57577_TGAC_v2_gene20145_novel02	Tp57577_TGAC_v2_gene20145	mRNA	363	1
Novelgene0176_novel01	Novelgene0176	mRNA	605	1
Novelgene0392_novel01	Novelgene0392	mRNA	3707	1
Tp57577_TGAC_v2_gene4615_novel01	Tp57577_TGAC_v2_gene4615	mRNA	331	1
Tp57577_TGAC_v2_gene32593_novel02	Tp57577_TGAC_v2_gene32593	mRNA	1178	1
Tp57577_TGAC_v2_gene25832_novel02	Tp57577_TGAC_v2_gene25832	mRNA	2325	1
Tp57577_TGAC_v2_gene9350_novel01	Tp57577_TGAC_v2_gene9350	mRNA	520	1
Tp57577_TGAC_v2_mRNA12776	Tp57577_TGAC_v2_gene12373	mRNA	1477	1
Tp57577_TGAC_v2_gene28382_novel04	Tp57577_TGAC_v2_gene28382	mRNA	555	1
Tp57577_TGAC_v2_gene28215_novel01	Tp57577_TGAC_v2_gene28215	mRNA	529	1
Tp57577_TGAC_v2_gene9248_novel01	Tp57577_TGAC_v2_gene9248	mRNA	956	1
Tp57577_TGAC_v2_mRNA1512	Tp57577_TGAC_v2_gene1490	mRNA	695	1
Tp57577_TGAC_v2_gene38582_novel01	Tp57577_TGAC_v2_gene38582	mRNA	534	1
Tp57577_TGAC_v2_gene30093_novel05	Tp57577_TGAC_v2_gene30093	mRNA	638	1
Novelgene0829_novel01	Novelgene0829	mRNA	450	1
Tp57577_TGAC_v2_gene18839_novel01	Tp57577_TGAC_v2_gene18839	mRNA	2566	1
Tp57577_TGAC_v2_gene39559_novel01	Tp57577_TGAC_v2_gene39559	mRNA	471	1
Tp57577_TGAC_v2_mRNA6072	Tp57577_TGAC_v2_gene5872	mRNA	2577	1
Tp57577_TGAC_v2_mRNA38665	Tp57577_TGAC_v2_gene37409	mRNA	2089	1
Tp57577_TGAC_v2_gene26962_novel01	Tp57577_TGAC_v2_gene26962	mRNA	1039	1
Tp57577_TGAC_v2_mRNA41354	Tp57577_TGAC_v2_gene40005	mRNA	490	1
Tp57577_TGAC_v2_gene6797_novel01	Tp57577_TGAC_v2_gene6797	mRNA	1463	1
Tp57577_TGAC_v2_gene17415_novel01	Tp57577_TGAC_v2_gene17415	mRNA	389	1
Tp57577_TGAC_v2_mRNA8282	Tp57577_TGAC_v2_gene8009	mRNA	549	1
Tp57577_TGAC_v2_mRNA41946	Tp57577_TGAC_v2_gene40592	mRNA	621	1
Tp57577_TGAC_v2_gene15659_novel03	Tp57577_TGAC_v2_gene15659	mRNA	812	1
Tp57577_TGAC_v2_gene11821_novel02	Tp57577_TGAC_v2_gene11821	mRNA	727	1
Tp57577_TGAC_v2_mRNA29982	Tp57577_TGAC_v2_gene28998	mRNA	2674	1
Tp57577_TGAC_v2_gene2393_novel03	Tp57577_TGAC_v2_gene2393	mRNA	3759	1
Tp57577_TGAC_v2_mRNA13303	Tp57577_TGAC_v2_gene12881	mRNA	565	1
Tp57577_TGAC_v2_gene9123_novel01	Tp57577_TGAC_v2_gene9123	mRNA	1144	1
Tp57577_TGAC_v2_gene38292_novel02	Tp57577_TGAC_v2_gene38292	mRNA	1168	1
Tp57577_TGAC_v2_gene24188_novel02	Tp57577_TGAC_v2_gene24188	mRNA	325	1
Novelgene0137_novel01	Novelgene0137	mRNA	587	1
Tp57577_TGAC_v2_gene10355_novel02	Tp57577_TGAC_v2_gene10355	mRNA	564	1
Tp57577_TGAC_v2_gene30481_novel01	Tp57577_TGAC_v2_gene30481	mRNA	2185	1
Tp57577_TGAC_v2_mRNA2367	Tp57577_TGAC_v2_gene2305	mRNA	794	1
Tp57577_TGAC_v2_gene27927_novel02	Tp57577_TGAC_v2_gene27927	mRNA	707	1
Tp57577_TGAC_v2_gene17139_novel01	Tp57577_TGAC_v2_gene17139	mRNA	359	1
Tp57577_TGAC_v2_mRNA31566	Tp57577_TGAC_v2_gene30531	mRNA	689	1
Tp57577_TGAC_v2_mRNA3256	Tp57577_TGAC_v2_gene3164	mRNA	625	1
Tp57577_TGAC_v2_gene8079_novel02	Tp57577_TGAC_v2_gene8079	mRNA	384	1
Tp57577_TGAC_v2_gene13828_novel03	Tp57577_TGAC_v2_gene13828	mRNA	604	1
Tp57577_TGAC_v2_gene11795_novel02	Tp57577_TGAC_v2_gene11795	mRNA	1080	1
Tp57577_TGAC_v2_gene33809_novel02	Tp57577_TGAC_v2_gene33809	mRNA	451	1
Tp57577_TGAC_v2_gene2304_novel02	Tp57577_TGAC_v2_gene2304	mRNA	2036	1
Tp57577_TGAC_v2_gene29997_novel01	Tp57577_TGAC_v2_gene29997	mRNA	420	1
Tp57577_TGAC_v2_gene6347_novel01	Tp57577_TGAC_v2_gene6347	mRNA	988	1
Tp57577_TGAC_v2_mRNA41184	Tp57577_TGAC_v2_gene39835	mRNA	1094	1
Tp57577_TGAC_v2_gene1647_novel01	Tp57577_TGAC_v2_gene1647	mRNA	496	1
Tp57577_TGAC_v2_gene18831_novel03	Tp57577_TGAC_v2_gene18831	mRNA	671	1
Tp57577_TGAC_v2_gene25791_novel03	Tp57577_TGAC_v2_gene25791	mRNA	619	1
Tp57577_TGAC_v2_gene3862_novel02	Tp57577_TGAC_v2_gene3862	mRNA	428	1
Tp57577_TGAC_v2_gene5770_novel01	Tp57577_TGAC_v2_gene5770	mRNA	1717	1
Tp57577_TGAC_v2_gene1343_novel03	Tp57577_TGAC_v2_gene1343	mRNA	954	1
Tp57577_TGAC_v2_gene16257_novel01	Tp57577_TGAC_v2_gene16257	mRNA	454	1
Tp57577_TGAC_v2_gene9258_novel01	Tp57577_TGAC_v2_gene9258	mRNA	906	1
Tp57577_TGAC_v2_gene13290_novel01	Tp57577_TGAC_v2_gene13290	mRNA	511	1
Tp57577_TGAC_v2_mRNA20095	Tp57577_TGAC_v2_gene19420	mRNA	837	1
Tp57577_TGAC_v2_gene18264_novel01	Tp57577_TGAC_v2_gene18264	mRNA	498	1
Tp57577_TGAC_v2_gene24876_novel01	Tp57577_TGAC_v2_gene24876	mRNA	402	1
Tp57577_TGAC_v2_gene23201_novel03	Tp57577_TGAC_v2_gene23201	mRNA	2504	1
Tp57577_TGAC_v2_gene9819_novel04	Tp57577_TGAC_v2_gene9819	mRNA	851	1
Tp57577_TGAC_v2_mRNA18102	Tp57577_TGAC_v2_gene17489	mRNA	1438	1
Tp57577_TGAC_v2_gene25068_novel04	Tp57577_TGAC_v2_gene25068	mRNA	674	1
Tp57577_TGAC_v2_gene37461_novel02	Tp57577_TGAC_v2_gene37461	mRNA	422	1
Tp57577_TGAC_v2_mRNA36366	Tp57577_TGAC_v2_gene35171	mRNA	978	1
Tp57577_TGAC_v2_gene3269_novel01	Tp57577_TGAC_v2_gene3269	mRNA	1065	1
Tp57577_TGAC_v2_gene11504_novel03	Tp57577_TGAC_v2_gene11504	mRNA	1158	1
Tp57577_TGAC_v2_gene21188_novel01	Tp57577_TGAC_v2_gene21188	mRNA	1079	1
Tp57577_TGAC_v2_mRNA7343	Tp57577_TGAC_v2_gene7094	mRNA	510	1
Tp57577_TGAC_v2_gene3289_novel01	Tp57577_TGAC_v2_gene3289	mRNA	5206	1
Tp57577_TGAC_v2_gene12243_novel01	Tp57577_TGAC_v2_gene12243	mRNA	2052	1
Tp57577_TGAC_v2_gene30928_novel01	Tp57577_TGAC_v2_gene30928	mRNA	432	1
Novelgene0220_novel01	Novelgene0220	mRNA	1536	1
Tp57577_TGAC_v2_mRNA33967	Tp57577_TGAC_v2_gene32863	mRNA	598	1
Tp57577_TGAC_v2_gene34635_novel03	Tp57577_TGAC_v2_gene34635	mRNA	413	1
Tp57577_TGAC_v2_mRNA5634	Tp57577_TGAC_v2_gene5444	mRNA	517	1
Tp57577_TGAC_v2_gene12118_novel01	Tp57577_TGAC_v2_gene12118	mRNA	866	1
Tp57577_TGAC_v2_gene40836_novel01	Tp57577_TGAC_v2_gene40836	mRNA	507	1
Tp57577_TGAC_v2_gene25044_novel02	Tp57577_TGAC_v2_gene25044	mRNA	3433	1
Tp57577_TGAC_v2_gene17700_novel03	Tp57577_TGAC_v2_gene17700	mRNA	652	1
Tp57577_TGAC_v2_gene13951_novel02	Tp57577_TGAC_v2_gene13951	mRNA	757	1
Tp57577_TGAC_v2_gene4230_novel01	Tp57577_TGAC_v2_gene4230	mRNA	4542	1
Tp57577_TGAC_v2_gene10309_novel02	Tp57577_TGAC_v2_gene10309	mRNA	2597	1
Tp57577_TGAC_v2_gene38915_novel02	Tp57577_TGAC_v2_gene38915	mRNA	1954	1
Novelgene0618_novel03	Novelgene0618	mRNA	2334	1
Tp57577_TGAC_v2_gene23197_novel01	Tp57577_TGAC_v2_gene23197	mRNA	2820	1
Tp57577_TGAC_v2_gene12416_novel04	Tp57577_TGAC_v2_gene12416	mRNA	2844	1
Tp57577_TGAC_v2_mRNA30772	Tp57577_TGAC_v2_gene29755	mRNA	547	1
Novelgene0662_novel01	Novelgene0662	mRNA	623	1
Tp57577_TGAC_v2_gene25472_novel02	Tp57577_TGAC_v2_gene25472	mRNA	483	1
Tp57577_TGAC_v2_gene39310_novel01	Tp57577_TGAC_v2_gene39310	mRNA	764	1
Tp57577_TGAC_v2_gene19393_novel03	Tp57577_TGAC_v2_gene19393	mRNA	1131	1
Novelgene1723_novel01	Novelgene1723	mRNA	1068	1
Tp57577_TGAC_v2_gene28554_novel01	Tp57577_TGAC_v2_gene28554	mRNA	725	1
Novelgene1418_novel01	Novelgene1418	mRNA	1102	1
Tp57577_TGAC_v2_gene32835_novel01	Tp57577_TGAC_v2_gene32835	mRNA	348	1
Tp57577_TGAC_v2_gene16735_novel02	Tp57577_TGAC_v2_gene16735	mRNA	694	1
Tp57577_TGAC_v2_gene30003_novel01	Tp57577_TGAC_v2_gene30003	mRNA	664	1
Novelgene0425_novel01	Novelgene0425	mRNA	2524	1
Tp57577_TGAC_v2_gene21133_novel03	Tp57577_TGAC_v2_gene21133	mRNA	683	1
Tp57577_TGAC_v2_gene36733_novel02	Tp57577_TGAC_v2_gene36733	mRNA	3236	1
Tp57577_TGAC_v2_mRNA9817	Tp57577_TGAC_v2_gene9497	mRNA	1692	1
Tp57577_TGAC_v2_mRNA39200	Tp57577_TGAC_v2_gene37918	mRNA	3555	1
Tp57577_TGAC_v2_gene37325_novel01	Tp57577_TGAC_v2_gene37325	mRNA	647	1
Tp57577_TGAC_v2_gene3782_novel03	Tp57577_TGAC_v2_gene3782	mRNA	1331	1
Tp57577_TGAC_v2_gene8983_novel08	Tp57577_TGAC_v2_gene8983	mRNA	647	1
Tp57577_TGAC_v2_gene5888_novel01	Tp57577_TGAC_v2_gene5888	mRNA	413	1
Tp57577_TGAC_v2_gene22660_novel01	Tp57577_TGAC_v2_gene22660	mRNA	556	1
Tp57577_TGAC_v2_gene32959_novel03	Tp57577_TGAC_v2_gene32959	mRNA	502	1
Tp57577_TGAC_v2_gene39043_novel05	Tp57577_TGAC_v2_gene39043	mRNA	1319	1
Tp57577_TGAC_v2_gene3290_novel09	Tp57577_TGAC_v2_gene3290	mRNA	4828	1
Tp57577_TGAC_v2_mRNA33872	Tp57577_TGAC_v2_gene32770	mRNA	1562	1
Tp57577_TGAC_v2_gene7016_novel02	Tp57577_TGAC_v2_gene7016	mRNA	3319	1
Tp57577_TGAC_v2_gene23239_novel05	Tp57577_TGAC_v2_gene23239	mRNA	526	1
Tp57577_TGAC_v2_gene22786_novel07	Tp57577_TGAC_v2_gene22786	mRNA	2246	1
Tp57577_TGAC_v2_gene19700_novel02	Tp57577_TGAC_v2_gene19700	mRNA	3017	1
Tp57577_TGAC_v2_gene39044_novel01	Tp57577_TGAC_v2_gene39044	mRNA	424	1
Tp57577_TGAC_v2_gene23525_novel03	Tp57577_TGAC_v2_gene23525	mRNA	963	1
Tp57577_TGAC_v2_mRNA34645	Tp57577_TGAC_v2_gene33515	mRNA	1327	1
Tp57577_TGAC_v2_gene36930_novel02	Tp57577_TGAC_v2_gene36930	mRNA	524	1
Tp57577_TGAC_v2_mRNA21748	Tp57577_TGAC_v2_gene21030	mRNA	1767	1
Tp57577_TGAC_v2_gene14043_novel01	Tp57577_TGAC_v2_gene14043	mRNA	739	1
Tp57577_TGAC_v2_gene25632_novel01	Tp57577_TGAC_v2_gene25632	mRNA	477	1
Tp57577_TGAC_v2_mRNA9075	Tp57577_TGAC_v2_gene8778	mRNA	644	1
Tp57577_TGAC_v2_mRNA39121	Tp57577_TGAC_v2_gene37843	mRNA	895	1
Tp57577_TGAC_v2_mRNA19742	Tp57577_TGAC_v2_gene19084	mRNA	866	1
Tp57577_TGAC_v2_gene13696_novel06	Tp57577_TGAC_v2_gene13696	mRNA	940	1
Tp57577_TGAC_v2_gene12556_novel01	Tp57577_TGAC_v2_gene12556	mRNA	1981	1
Tp57577_TGAC_v2_gene16556_novel01	Tp57577_TGAC_v2_gene16556	mRNA	2427	1
Tp57577_TGAC_v2_mRNA9371	Tp57577_TGAC_v2_gene9066	mRNA	1658	1
Tp57577_TGAC_v2_gene17888_novel01	Tp57577_TGAC_v2_gene17888	mRNA	2350	1
Tp57577_TGAC_v2_gene17446_novel01	Tp57577_TGAC_v2_gene17446	mRNA	281	1
Novelgene0717_novel01	Novelgene0717	mRNA	2603	1
Tp57577_TGAC_v2_gene22318_novel02	Tp57577_TGAC_v2_gene22318	mRNA	3032	1
Tp57577_TGAC_v2_gene2879_novel02	Tp57577_TGAC_v2_gene2879	mRNA	1301	1
Novelgene0701_novel02	Novelgene0701	mRNA	940	1
Tp57577_TGAC_v2_mRNA12259	Tp57577_TGAC_v2_gene11873	mRNA	484	1
Tp57577_TGAC_v2_gene11058_novel01	Tp57577_TGAC_v2_gene11058	mRNA	466	1
Tp57577_TGAC_v2_gene38588_novel01	Tp57577_TGAC_v2_gene38588	mRNA	2813	1
Tp57577_TGAC_v2_gene26664_novel01	Tp57577_TGAC_v2_gene26664	mRNA	409	1
Tp57577_TGAC_v2_gene13145_novel02	Tp57577_TGAC_v2_gene13145	mRNA	480	1
Tp57577_TGAC_v2_gene13784_novel01	Tp57577_TGAC_v2_gene13784	mRNA	442	1
Tp57577_TGAC_v2_gene14526_novel04	Tp57577_TGAC_v2_gene14526	mRNA	384	1
Tp57577_TGAC_v2_mRNA9564	Tp57577_TGAC_v2_gene9256	mRNA	2441	1
Novelgene0852_novel01	Novelgene0852	mRNA	3197	1
Tp57577_TGAC_v2_gene6797_novel02	Tp57577_TGAC_v2_gene6797	mRNA	672	1
Tp57577_TGAC_v2_gene4727_novel06	Tp57577_TGAC_v2_gene4727	mRNA	543	1
Tp57577_TGAC_v2_gene18266_novel05	Tp57577_TGAC_v2_gene18266	mRNA	2091	1
Tp57577_TGAC_v2_gene15401_novel02	Tp57577_TGAC_v2_gene15401	mRNA	445	1
Tp57577_TGAC_v2_gene891_novel01	Tp57577_TGAC_v2_gene891	mRNA	1938	1
Tp57577_TGAC_v2_gene11559_novel02	Tp57577_TGAC_v2_gene11559	mRNA	1166	1
Tp57577_TGAC_v2_gene32492_novel02	Tp57577_TGAC_v2_gene32492	mRNA	694	1
Tp57577_TGAC_v2_mRNA41476	Tp57577_TGAC_v2_gene40126	mRNA	300	1
Tp57577_TGAC_v2_gene13797_novel01	Tp57577_TGAC_v2_gene13797	mRNA	1050	1
Tp57577_TGAC_v2_mRNA24525	Tp57577_TGAC_v2_gene23712	mRNA	1400	1
Tp57577_TGAC_v2_gene7567_novel02	Tp57577_TGAC_v2_gene7567	mRNA	1240	1
Tp57577_TGAC_v2_gene1323_novel01	Tp57577_TGAC_v2_gene1323	mRNA	2574	1
Tp57577_TGAC_v2_gene3785_novel01	Tp57577_TGAC_v2_gene3785	mRNA	563	1
Tp57577_TGAC_v2_mRNA18283	Tp57577_TGAC_v2_gene17666	mRNA	664	1
Tp57577_TGAC_v2_mRNA14368	Tp57577_TGAC_v2_gene13909	mRNA	1449	1
Novelgene0240_novel04	Novelgene0240	mRNA	2769	1
Tp57577_TGAC_v2_gene11251_novel02	Tp57577_TGAC_v2_gene11251	mRNA	482	1
Tp57577_TGAC_v2_gene15682_novel01	Tp57577_TGAC_v2_gene15682	mRNA	691	1
Tp57577_TGAC_v2_gene36434_novel01	Tp57577_TGAC_v2_gene36434	mRNA	3575	1
Tp57577_TGAC_v2_gene15975_novel01	Tp57577_TGAC_v2_gene15975	mRNA	625	1
Tp57577_TGAC_v2_gene16546_novel02	Tp57577_TGAC_v2_gene16546	mRNA	1214	1
Tp57577_TGAC_v2_mRNA38765	Tp57577_TGAC_v2_gene37508	mRNA	5462	1
Tp57577_TGAC_v2_gene35727_novel04	Tp57577_TGAC_v2_gene35727	mRNA	2039	1
Tp57577_TGAC_v2_gene20246_novel02	Tp57577_TGAC_v2_gene20246	mRNA	499	1
Tp57577_TGAC_v2_gene36926_novel09	Tp57577_TGAC_v2_gene36926	mRNA	531	1
Tp57577_TGAC_v2_gene21453_novel02	Tp57577_TGAC_v2_gene21453	mRNA	1718	1
Tp57577_TGAC_v2_gene31906_novel01	Tp57577_TGAC_v2_gene31906	mRNA	3015	1
Tp57577_TGAC_v2_gene37610_novel04	Tp57577_TGAC_v2_gene37610	mRNA	544	1
Tp57577_TGAC_v2_gene12556_novel02	Tp57577_TGAC_v2_gene12556	mRNA	974	1
Tp57577_TGAC_v2_gene17093_novel02	Tp57577_TGAC_v2_gene17093	mRNA	426	1
Tp57577_TGAC_v2_gene34198_novel01	Tp57577_TGAC_v2_gene34198	mRNA	1439	1
Tp57577_TGAC_v2_gene38520_novel02	Tp57577_TGAC_v2_gene38520	mRNA	2773	1
Tp57577_TGAC_v2_gene9091_novel03	Tp57577_TGAC_v2_gene9091	mRNA	380	1
Tp57577_TGAC_v2_gene2533_novel02	Tp57577_TGAC_v2_gene2533	mRNA	594	1
Tp57577_TGAC_v2_gene21132_novel01	Tp57577_TGAC_v2_gene21132	mRNA	638	1
Tp57577_TGAC_v2_gene37631_novel03	Tp57577_TGAC_v2_gene37631	mRNA	580	1
Tp57577_TGAC_v2_gene18022_novel02	Tp57577_TGAC_v2_gene18022	mRNA	388	1
Tp57577_TGAC_v2_gene37403_novel03	Tp57577_TGAC_v2_gene37403	mRNA	1625	1
Tp57577_TGAC_v2_gene14029_novel03	Tp57577_TGAC_v2_gene14029	mRNA	2175	1
Tp57577_TGAC_v2_mRNA1960	Tp57577_TGAC_v2_gene1917	mRNA	2555	1
Tp57577_TGAC_v2_mRNA13337	Tp57577_TGAC_v2_gene12914	mRNA	1125	1
Tp57577_TGAC_v2_gene7954_novel09	Tp57577_TGAC_v2_gene7954	mRNA	607	1
Tp57577_TGAC_v2_gene25407_novel01	Tp57577_TGAC_v2_gene25407	mRNA	309	1
Tp57577_TGAC_v2_gene20272_novel01	Tp57577_TGAC_v2_gene20272	mRNA	871	1
Tp57577_TGAC_v2_gene30435_novel01	Tp57577_TGAC_v2_gene30435	mRNA	872	1
Tp57577_TGAC_v2_gene8741_novel01	Tp57577_TGAC_v2_gene8741	mRNA	496	1
Tp57577_TGAC_v2_gene25792_novel08	Tp57577_TGAC_v2_gene25792	mRNA	1422	1
Tp57577_TGAC_v2_gene2250_novel02	Tp57577_TGAC_v2_gene2250	mRNA	1733	1
Tp57577_TGAC_v2_gene19024_novel04	Tp57577_TGAC_v2_gene19024	mRNA	351	1
Tp57577_TGAC_v2_gene1044_novel02	Tp57577_TGAC_v2_gene1044	mRNA	2082	1
Tp57577_TGAC_v2_gene37409_novel01	Tp57577_TGAC_v2_gene37409	mRNA	1056	1
Novelgene0251_novel01	Novelgene0251	mRNA	331	1
Tp57577_TGAC_v2_gene20156_novel04	Tp57577_TGAC_v2_gene20156	mRNA	1165	1
Tp57577_TGAC_v2_gene33751_novel01	Tp57577_TGAC_v2_gene33751	mRNA	709	1
Tp57577_TGAC_v2_gene23373_novel01	Tp57577_TGAC_v2_gene23373	mRNA	822	1
Tp57577_TGAC_v2_gene10245_novel01	Tp57577_TGAC_v2_gene10245	mRNA	680	1
Tp57577_TGAC_v2_gene13773_novel05	Tp57577_TGAC_v2_gene13773	mRNA	580	1
Tp57577_TGAC_v2_gene14473_novel01	Tp57577_TGAC_v2_gene14473	mRNA	446	1
Tp57577_TGAC_v2_gene9936_novel03	Tp57577_TGAC_v2_gene9936	mRNA	769	1
Tp57577_TGAC_v2_gene13828_novel01	Tp57577_TGAC_v2_gene13828	mRNA	839	1
Tp57577_TGAC_v2_gene1023_novel01	Tp57577_TGAC_v2_gene1023	mRNA	373	1
Novelgene1181_novel01	Novelgene1181	mRNA	1208	1
Tp57577_TGAC_v2_gene25655_novel01	Tp57577_TGAC_v2_gene25655	mRNA	433	1
Tp57577_TGAC_v2_gene4266_novel02	Tp57577_TGAC_v2_gene4266	mRNA	2349	1
Tp57577_TGAC_v2_gene24035_novel01	Tp57577_TGAC_v2_gene24035	mRNA	631	1
Tp57577_TGAC_v2_gene15659_novel02	Tp57577_TGAC_v2_gene15659	mRNA	898	1
Novelgene1719_novel01	Novelgene1719	mRNA	366	1
Tp57577_TGAC_v2_gene34997_novel04	Tp57577_TGAC_v2_gene34997	mRNA	806	1
Tp57577_TGAC_v2_gene15467_novel01	Tp57577_TGAC_v2_gene15467	mRNA	1262	1
Tp57577_TGAC_v2_gene21456_novel08	Tp57577_TGAC_v2_gene21456	mRNA	522	1
Tp57577_TGAC_v2_mRNA38808	Tp57577_TGAC_v2_gene37551	mRNA	859	1
Novelgene1760_novel01	Novelgene1760	mRNA	2002	1
Tp57577_TGAC_v2_gene40280_novel01	Tp57577_TGAC_v2_gene40280	mRNA	940	1
Tp57577_TGAC_v2_mRNA30970	Tp57577_TGAC_v2_gene29946	mRNA	460	1
Tp57577_TGAC_v2_gene4541_novel01	Tp57577_TGAC_v2_gene4541	mRNA	412	1
Tp57577_TGAC_v2_gene24410_novel02	Tp57577_TGAC_v2_gene24410	mRNA	1356	1
Tp57577_TGAC_v2_gene23247_novel01	Tp57577_TGAC_v2_gene23247	mRNA	488	1
Novelgene1327_novel01	Novelgene1327	mRNA	2668	1
Tp57577_TGAC_v2_mRNA6647	Tp57577_TGAC_v2_gene6421	mRNA	2743	1
Tp57577_TGAC_v2_gene2827_novel02	Tp57577_TGAC_v2_gene2827	mRNA	487	1
Tp57577_TGAC_v2_mRNA37248	Tp57577_TGAC_v2_gene36031	mRNA	3876	1
Tp57577_TGAC_v2_gene36666_novel07	Tp57577_TGAC_v2_gene36666	mRNA	2387	1
Tp57577_TGAC_v2_gene5129_novel11	Tp57577_TGAC_v2_gene5129	mRNA	536	1
Tp57577_TGAC_v2_gene25722_novel02	Tp57577_TGAC_v2_gene25722	mRNA	483	1
Tp57577_TGAC_v2_mRNA5773	Tp57577_TGAC_v2_gene5580	mRNA	2092	1
Tp57577_TGAC_v2_gene38544_novel01	Tp57577_TGAC_v2_gene38544	mRNA	758	1
Tp57577_TGAC_v2_gene34803_novel01	Tp57577_TGAC_v2_gene34803	mRNA	438	1
Tp57577_TGAC_v2_gene10251_novel01	Tp57577_TGAC_v2_gene10251	mRNA	1119	1
Tp57577_TGAC_v2_gene16578_novel02	Tp57577_TGAC_v2_gene16578	mRNA	1200	1
Tp57577_TGAC_v2_gene10375_novel02	Tp57577_TGAC_v2_gene10375	mRNA	1835	1
Tp57577_TGAC_v2_mRNA29589	Tp57577_TGAC_v2_gene28625	mRNA	391	1
Tp57577_TGAC_v2_gene6104_novel15	Tp57577_TGAC_v2_gene6104	mRNA	496	1
Tp57577_TGAC_v2_mRNA15115	Tp57577_TGAC_v2_gene14625	mRNA	5991	1
Tp57577_TGAC_v2_gene30642_novel01	Tp57577_TGAC_v2_gene30642	mRNA	3905	1
Tp57577_TGAC_v2_gene1705_novel05	Tp57577_TGAC_v2_gene1705	mRNA	2315	1
Tp57577_TGAC_v2_gene12164_novel02	Tp57577_TGAC_v2_gene12164	mRNA	3285	1
Tp57577_TGAC_v2_mRNA17115	Tp57577_TGAC_v2_gene16541	mRNA	656	1
Tp57577_TGAC_v2_gene12526_novel01	Tp57577_TGAC_v2_gene12526	mRNA	599	1
Novelgene0885_novel01	Novelgene0885	mRNA	535	1
Tp57577_TGAC_v2_gene11814_novel01	Tp57577_TGAC_v2_gene11814	mRNA	1131	1
Tp57577_TGAC_v2_gene27814_novel14	Tp57577_TGAC_v2_gene27814	mRNA	453	1
Tp57577_TGAC_v2_mRNA29720	Tp57577_TGAC_v2_gene28751	mRNA	1122	1
Novelgene0215_novel02	Novelgene0215	mRNA	418	1
Tp57577_TGAC_v2_gene15583_novel03	Tp57577_TGAC_v2_gene15583	mRNA	1195	1
Tp57577_TGAC_v2_gene19550_novel01	Tp57577_TGAC_v2_gene19550	mRNA	1030	1
Tp57577_TGAC_v2_gene9151_novel04	Tp57577_TGAC_v2_gene9151	mRNA	446	1
Novelgene0435_novel01	Novelgene0435	mRNA	1046	1
Tp57577_TGAC_v2_gene8648_novel01	Tp57577_TGAC_v2_gene8648	mRNA	301	1
Tp57577_TGAC_v2_mRNA32344	Tp57577_TGAC_v2_gene31291	mRNA	1514	1
Tp57577_TGAC_v2_mRNA18395	Tp57577_TGAC_v2_gene17773	mRNA	474	1
Tp57577_TGAC_v2_mRNA33850	Tp57577_TGAC_v2_gene32748	mRNA	632	1
Tp57577_TGAC_v2_gene3136_novel01	Tp57577_TGAC_v2_gene3136	mRNA	840	1
Tp57577_TGAC_v2_gene2827_novel01	Tp57577_TGAC_v2_gene2827	mRNA	372	1
Tp57577_TGAC_v2_gene38572_novel01	Tp57577_TGAC_v2_gene38572	mRNA	637	1
Tp57577_TGAC_v2_gene8777_novel01	Tp57577_TGAC_v2_gene8777	mRNA	397	1
Tp57577_TGAC_v2_gene18273_novel01	Tp57577_TGAC_v2_gene18273	mRNA	621	1
Tp57577_TGAC_v2_gene36085_novel01	Tp57577_TGAC_v2_gene36085	mRNA	921	1
Tp57577_TGAC_v2_mRNA16363	Tp57577_TGAC_v2_gene15826	mRNA	1086	1
Tp57577_TGAC_v2_gene35577_novel01	Tp57577_TGAC_v2_gene35577	mRNA	381	1
Tp57577_TGAC_v2_gene5768_novel01	Tp57577_TGAC_v2_gene5768	mRNA	459	1
Tp57577_TGAC_v2_mRNA23530	Tp57577_TGAC_v2_gene22750	mRNA	894	1
Tp57577_TGAC_v2_gene15905_novel02	Tp57577_TGAC_v2_gene15905	mRNA	1622	1
Tp57577_TGAC_v2_gene12758_novel01	Tp57577_TGAC_v2_gene12758	mRNA	312	1
Tp57577_TGAC_v2_gene12808_novel02	Tp57577_TGAC_v2_gene12808	mRNA	829	1
Tp57577_TGAC_v2_gene29489_novel01	Tp57577_TGAC_v2_gene29489	mRNA	1922	1
Tp57577_TGAC_v2_gene19786_novel02	Tp57577_TGAC_v2_gene19786	mRNA	1104	1
Tp57577_TGAC_v2_gene16250_novel01	Tp57577_TGAC_v2_gene16250	mRNA	665	1
Tp57577_TGAC_v2_gene12253_novel10	Tp57577_TGAC_v2_gene12253	mRNA	536	1
Tp57577_TGAC_v2_gene24760_novel01	Tp57577_TGAC_v2_gene24760	mRNA	2147	1
Novelgene1261_novel01	Novelgene1261	mRNA	1140	1
Tp57577_TGAC_v2_gene12626_novel02	Tp57577_TGAC_v2_gene12626	mRNA	1129	1
Tp57577_TGAC_v2_gene15679_novel03	Tp57577_TGAC_v2_gene15679	mRNA	1571	1
Tp57577_TGAC_v2_mRNA8868	Tp57577_TGAC_v2_gene8580	mRNA	741	1
Tp57577_TGAC_v2_mRNA2964	Tp57577_TGAC_v2_gene2883	mRNA	684	1
Tp57577_TGAC_v2_gene27483_novel01	Tp57577_TGAC_v2_gene27483	mRNA	392	1
Tp57577_TGAC_v2_mRNA12599	Tp57577_TGAC_v2_gene12202	mRNA	1716	1
Novelgene0622_novel01	Novelgene0622	mRNA	1473	1
Novelgene0012_novel02	Novelgene0012	mRNA	1577	1
Tp57577_TGAC_v2_gene4028_novel01	Tp57577_TGAC_v2_gene4028	mRNA	353	1
Tp57577_TGAC_v2_gene30481_novel02	Tp57577_TGAC_v2_gene30481	mRNA	933	1
Novelgene1632_novel01	Novelgene1632	mRNA	1306	1
Novelgene0561_novel01	Novelgene0561	mRNA	2222	1
Tp57577_TGAC_v2_gene9928_novel01	Tp57577_TGAC_v2_gene9928	mRNA	493	1
Tp57577_TGAC_v2_mRNA41442	Tp57577_TGAC_v2_gene40093	mRNA	2214	1
Tp57577_TGAC_v2_gene38728_novel06	Tp57577_TGAC_v2_gene38728	mRNA	543	1
Tp57577_TGAC_v2_gene155_novel01	Tp57577_TGAC_v2_gene155	mRNA	937	1
Tp57577_TGAC_v2_mRNA16282	Tp57577_TGAC_v2_gene15747	mRNA	811	1
Tp57577_TGAC_v2_gene1257_novel01	Tp57577_TGAC_v2_gene1257	mRNA	540	1
Tp57577_TGAC_v2_mRNA4938	Tp57577_TGAC_v2_gene4778	mRNA	1668	1
Tp57577_TGAC_v2_mRNA18749	Tp57577_TGAC_v2_gene18118	mRNA	2979	1
Novelgene0183_novel01	Novelgene0183	mRNA	1615	1
Tp57577_TGAC_v2_mRNA20604	Tp57577_TGAC_v2_gene19914	mRNA	1107	1
Tp57577_TGAC_v2_mRNA30585	Tp57577_TGAC_v2_gene29570	mRNA	631	1
Tp57577_TGAC_v2_gene23602_novel01	Tp57577_TGAC_v2_gene23602	mRNA	749	1
Tp57577_TGAC_v2_gene14204_novel01	Tp57577_TGAC_v2_gene14204	mRNA	1205	1
Novelgene1544_novel01	Novelgene1544	mRNA	1045	1
Tp57577_TGAC_v2_gene12283_novel02	Tp57577_TGAC_v2_gene12283	mRNA	873	1
Tp57577_TGAC_v2_gene10483_novel01	Tp57577_TGAC_v2_gene10483	mRNA	698	1
Tp57577_TGAC_v2_gene6597_novel01	Tp57577_TGAC_v2_gene6597	mRNA	624	1
Tp57577_TGAC_v2_gene34250_novel01	Tp57577_TGAC_v2_gene34250	mRNA	3352	1
Tp57577_TGAC_v2_gene20176_novel02	Tp57577_TGAC_v2_gene20176	mRNA	638	1
Tp57577_TGAC_v2_gene34343_novel04	Tp57577_TGAC_v2_gene34343	mRNA	769	1
Novelgene1117_novel01	Novelgene1117	mRNA	2182	1
Tp57577_TGAC_v2_gene25583_novel01	Tp57577_TGAC_v2_gene25583	mRNA	1913	1
Tp57577_TGAC_v2_mRNA26575	Tp57577_TGAC_v2_gene25696	mRNA	1815	1
Tp57577_TGAC_v2_mRNA39765	Tp57577_TGAC_v2_gene38466	mRNA	1549	1
Tp57577_TGAC_v2_mRNA32487	Tp57577_TGAC_v2_gene31428	mRNA	1891	1
Tp57577_TGAC_v2_gene32690_novel03	Tp57577_TGAC_v2_gene32690	mRNA	2216	1
Tp57577_TGAC_v2_mRNA39900	Tp57577_TGAC_v2_gene38597	mRNA	456	1
Tp57577_TGAC_v2_gene23143_novel01	Tp57577_TGAC_v2_gene23143	mRNA	545	1
Tp57577_TGAC_v2_gene5122_novel03	Tp57577_TGAC_v2_gene5122	mRNA	1112	1
Tp57577_TGAC_v2_gene25361_novel02	Tp57577_TGAC_v2_gene25361	mRNA	807	1
Tp57577_TGAC_v2_mRNA34282	Tp57577_TGAC_v2_gene33165	mRNA	1228	1
Tp57577_TGAC_v2_gene26494_novel04	Tp57577_TGAC_v2_gene26494	mRNA	728	1
Tp57577_TGAC_v2_gene21850_novel07	Tp57577_TGAC_v2_gene21850	mRNA	561	1
Novelgene1222_novel01	Novelgene1222	mRNA	433	1
Tp57577_TGAC_v2_gene6183_novel03	Tp57577_TGAC_v2_gene6183	mRNA	473	1
Tp57577_TGAC_v2_gene1732_novel02	Tp57577_TGAC_v2_gene1732	mRNA	403	1
Tp57577_TGAC_v2_gene28762_novel01	Tp57577_TGAC_v2_gene28762	mRNA	548	1
Tp57577_TGAC_v2_mRNA14373	Tp57577_TGAC_v2_gene13914	mRNA	1529	1
Tp57577_TGAC_v2_gene36778_novel01	Tp57577_TGAC_v2_gene36778	mRNA	402	1
Tp57577_TGAC_v2_gene16549_novel01	Tp57577_TGAC_v2_gene16549	mRNA	311	1
Tp57577_TGAC_v2_gene16465_novel01	Tp57577_TGAC_v2_gene16465	mRNA	618	1
Tp57577_TGAC_v2_mRNA22109	Tp57577_TGAC_v2_gene21378	mRNA	876	1
Tp57577_TGAC_v2_gene15421_novel01	Tp57577_TGAC_v2_gene15421	mRNA	485	1
Tp57577_TGAC_v2_gene37587_novel02	Tp57577_TGAC_v2_gene37587	mRNA	381	1
Tp57577_TGAC_v2_gene1551_novel01	Tp57577_TGAC_v2_gene1551	mRNA	2437	1
Tp57577_TGAC_v2_gene34142_novel01	Tp57577_TGAC_v2_gene34142	mRNA	1730	1
Novelgene1760_novel02	Novelgene1760	mRNA	518	1
Tp57577_TGAC_v2_gene27307_novel01	Tp57577_TGAC_v2_gene27307	mRNA	461	1
Tp57577_TGAC_v2_gene3834_novel03	Tp57577_TGAC_v2_gene3834	mRNA	320	1
Tp57577_TGAC_v2_mRNA39353	Tp57577_TGAC_v2_gene38067	mRNA	547	1
Tp57577_TGAC_v2_gene15029_novel02	Tp57577_TGAC_v2_gene15029	mRNA	612	1
Tp57577_TGAC_v2_mRNA15942	Tp57577_TGAC_v2_gene15423	mRNA	1796	1
Tp57577_TGAC_v2_gene32155_novel01	Tp57577_TGAC_v2_gene32155	mRNA	559	1
Tp57577_TGAC_v2_gene17341_novel02	Tp57577_TGAC_v2_gene17341	mRNA	441	1
Tp57577_TGAC_v2_gene22098_novel01	Tp57577_TGAC_v2_gene22098	mRNA	550	1
Tp57577_TGAC_v2_mRNA5432	Tp57577_TGAC_v2_gene5253	mRNA	715	1
Tp57577_TGAC_v2_gene6068_novel01	Tp57577_TGAC_v2_gene6068	mRNA	777	1
Tp57577_TGAC_v2_gene15064_novel01	Tp57577_TGAC_v2_gene15064	mRNA	368	1
Tp57577_TGAC_v2_mRNA30175	Tp57577_TGAC_v2_gene29176	mRNA	1306	1
Tp57577_TGAC_v2_gene22962_novel01	Tp57577_TGAC_v2_gene22962	mRNA	789	1
Tp57577_TGAC_v2_mRNA34861	Tp57577_TGAC_v2_gene33724	mRNA	851	1
Tp57577_TGAC_v2_gene32642_novel01	Tp57577_TGAC_v2_gene32642	mRNA	440	1
Tp57577_TGAC_v2_gene3341_novel03	Tp57577_TGAC_v2_gene3341	mRNA	1075	1
Tp57577_TGAC_v2_gene20030_novel03	Tp57577_TGAC_v2_gene20030	mRNA	827	1
Tp57577_TGAC_v2_gene7290_novel01	Tp57577_TGAC_v2_gene7290	mRNA	424	1
Tp57577_TGAC_v2_gene34848_novel01	Tp57577_TGAC_v2_gene34848	mRNA	444	1
Tp57577_TGAC_v2_gene9811_novel03	Tp57577_TGAC_v2_gene9811	mRNA	1062	1
Tp57577_TGAC_v2_gene2261_novel06	Tp57577_TGAC_v2_gene2261	mRNA	3182	1
Tp57577_TGAC_v2_mRNA8883	Tp57577_TGAC_v2_gene8595	mRNA	924	1
Tp57577_TGAC_v2_mRNA31709	Tp57577_TGAC_v2_gene30671	mRNA	1585	1
Tp57577_TGAC_v2_gene24803_novel03	Tp57577_TGAC_v2_gene24803	mRNA	2121	1
Tp57577_TGAC_v2_gene37918_novel01	Tp57577_TGAC_v2_gene37918	mRNA	1297	1
Tp57577_TGAC_v2_gene18626_novel01	Tp57577_TGAC_v2_gene18626	mRNA	1280	1
Tp57577_TGAC_v2_gene1896_novel03	Tp57577_TGAC_v2_gene1896	mRNA	1256	1
Tp57577_TGAC_v2_gene27748_novel03	Tp57577_TGAC_v2_gene27748	mRNA	3765	1
Tp57577_TGAC_v2_gene19845_novel08	Tp57577_TGAC_v2_gene19845	mRNA	2024	1
Tp57577_TGAC_v2_gene3033_novel04	Tp57577_TGAC_v2_gene3033	mRNA	918	1
Tp57577_TGAC_v2_mRNA40136	Tp57577_TGAC_v2_gene38824	mRNA	1035	1
Novelgene0030_novel01	Novelgene0030	mRNA	725	1
Tp57577_TGAC_v2_gene36804_novel02	Tp57577_TGAC_v2_gene36804	mRNA	357	1
Tp57577_TGAC_v2_mRNA12218	Tp57577_TGAC_v2_gene11834	mRNA	648	1
Tp57577_TGAC_v2_gene22408_novel01	Tp57577_TGAC_v2_gene22408	mRNA	1726	1
Tp57577_TGAC_v2_gene8038_novel07	Tp57577_TGAC_v2_gene8038	mRNA	637	1
Tp57577_TGAC_v2_gene35261_novel01	Tp57577_TGAC_v2_gene35261	mRNA	541	1
Tp57577_TGAC_v2_gene1680_novel01	Tp57577_TGAC_v2_gene1680	mRNA	669	1
Tp57577_TGAC_v2_gene13602_novel01	Tp57577_TGAC_v2_gene13602	mRNA	2302	1
Tp57577_TGAC_v2_gene13635_novel02	Tp57577_TGAC_v2_gene13635	mRNA	1119	1
Tp57577_TGAC_v2_gene1991_novel01	Tp57577_TGAC_v2_gene1991	mRNA	507	1
Tp57577_TGAC_v2_gene31987_novel01	Tp57577_TGAC_v2_gene31987	mRNA	672	1
Tp57577_TGAC_v2_gene17783_novel01	Tp57577_TGAC_v2_gene17783	mRNA	500	1
Tp57577_TGAC_v2_gene4759_novel01	Tp57577_TGAC_v2_gene4759	mRNA	1072	1
Tp57577_TGAC_v2_mRNA41324	Tp57577_TGAC_v2_gene39975	mRNA	631	1
Tp57577_TGAC_v2_gene12337_novel02	Tp57577_TGAC_v2_gene12337	mRNA	340	1
Tp57577_TGAC_v2_gene11425_novel03	Tp57577_TGAC_v2_gene11425	mRNA	2113	1
Tp57577_TGAC_v2_gene30568_novel02	Tp57577_TGAC_v2_gene30568	mRNA	429	1
Tp57577_TGAC_v2_mRNA23934	Tp57577_TGAC_v2_gene23143	mRNA	1060	1
Tp57577_TGAC_v2_gene34068_novel01	Tp57577_TGAC_v2_gene34068	mRNA	527	1
Tp57577_TGAC_v2_mRNA6780	Tp57577_TGAC_v2_gene6550	mRNA	1147	1
Tp57577_TGAC_v2_gene4766_novel01	Tp57577_TGAC_v2_gene4766	mRNA	1181	1
Tp57577_TGAC_v2_gene25673_novel01	Tp57577_TGAC_v2_gene25673	mRNA	431	1
Tp57577_TGAC_v2_gene31452_novel01	Tp57577_TGAC_v2_gene31452	mRNA	1142	1
Tp57577_TGAC_v2_gene39002_novel02	Tp57577_TGAC_v2_gene39002	mRNA	851	1
Tp57577_TGAC_v2_gene3722_novel02	Tp57577_TGAC_v2_gene3722	mRNA	682	1
Tp57577_TGAC_v2_gene14625_novel02	Tp57577_TGAC_v2_gene14625	mRNA	5880	1
Tp57577_TGAC_v2_gene17665_novel01	Tp57577_TGAC_v2_gene17665	mRNA	628	1
Tp57577_TGAC_v2_gene2892_novel01	Tp57577_TGAC_v2_gene2892	mRNA	983	1
Tp57577_TGAC_v2_gene8276_novel02	Tp57577_TGAC_v2_gene8276	mRNA	372	1
Tp57577_TGAC_v2_gene23534_novel04	Tp57577_TGAC_v2_gene23534	mRNA	2348	1
Tp57577_TGAC_v2_gene14628_novel01	Tp57577_TGAC_v2_gene14628	mRNA	1224	1
Tp57577_TGAC_v2_gene38707_novel01	Tp57577_TGAC_v2_gene38707	mRNA	649	1
Tp57577_TGAC_v2_gene6128_novel01	Tp57577_TGAC_v2_gene6128	mRNA	2255	1
Tp57577_TGAC_v2_gene28077_novel09	Tp57577_TGAC_v2_gene28077	mRNA	519	1
Tp57577_TGAC_v2_gene34355_novel01	Tp57577_TGAC_v2_gene34355	mRNA	708	1
Novelgene0988_novel01	Novelgene0988	mRNA	1129	1
Tp57577_TGAC_v2_gene15167_novel03	Tp57577_TGAC_v2_gene15167	mRNA	483	1
Tp57577_TGAC_v2_mRNA36505	Tp57577_TGAC_v2_gene35306	mRNA	483	1
Tp57577_TGAC_v2_mRNA37928	Tp57577_TGAC_v2_gene36700	mRNA	2261	1
Tp57577_TGAC_v2_gene25923_novel01	Tp57577_TGAC_v2_gene25923	mRNA	570	1
Tp57577_TGAC_v2_gene17033_novel02	Tp57577_TGAC_v2_gene17033	mRNA	412	1
Tp57577_TGAC_v2_mRNA3732	Tp57577_TGAC_v2_gene3626	mRNA	418	1
Tp57577_TGAC_v2_gene25431_novel04	Tp57577_TGAC_v2_gene25431	mRNA	549	1
Tp57577_TGAC_v2_gene2031_novel01	Tp57577_TGAC_v2_gene2031	mRNA	532	1
Tp57577_TGAC_v2_mRNA16795	Tp57577_TGAC_v2_gene16236	mRNA	875	1
Tp57577_TGAC_v2_gene2529_novel01	Tp57577_TGAC_v2_gene2529	mRNA	319	1
Tp57577_TGAC_v2_gene5438_novel01	Tp57577_TGAC_v2_gene5438	mRNA	2714	1
Tp57577_TGAC_v2_gene36620_novel01	Tp57577_TGAC_v2_gene36620	mRNA	1525	1
Novelgene1409_novel01	Novelgene1409	mRNA	305	1
Tp57577_TGAC_v2_mRNA13553	Tp57577_TGAC_v2_gene13117	mRNA	1800	1
Tp57577_TGAC_v2_gene14370_novel03	Tp57577_TGAC_v2_gene14370	mRNA	1190	1
Tp57577_TGAC_v2_gene24685_novel04	Tp57577_TGAC_v2_gene24685	mRNA	307	1
Tp57577_TGAC_v2_gene38855_novel05	Tp57577_TGAC_v2_gene38855	mRNA	1302	1
Tp57577_TGAC_v2_mRNA30493	Tp57577_TGAC_v2_gene29481	mRNA	783	1
Tp57577_TGAC_v2_gene13092_novel01	Tp57577_TGAC_v2_gene13092	mRNA	689	1
Tp57577_TGAC_v2_gene14742_novel03	Tp57577_TGAC_v2_gene14742	mRNA	632	1
Tp57577_TGAC_v2_gene14882_novel02	Tp57577_TGAC_v2_gene14882	mRNA	1225	1
Tp57577_TGAC_v2_gene38426_novel01	Tp57577_TGAC_v2_gene38426	mRNA	482	1
Tp57577_TGAC_v2_gene29158_novel01	Tp57577_TGAC_v2_gene29158	mRNA	1200	1
Tp57577_TGAC_v2_gene3322_novel02	Tp57577_TGAC_v2_gene3322	mRNA	341	1
Tp57577_TGAC_v2_gene4448_novel02	Tp57577_TGAC_v2_gene4448	mRNA	748	1
Tp57577_TGAC_v2_mRNA17917	Tp57577_TGAC_v2_gene17312	mRNA	1349	1
Tp57577_TGAC_v2_gene4116_novel05	Tp57577_TGAC_v2_gene4116	mRNA	620	1
Tp57577_TGAC_v2_gene10315_novel01	Tp57577_TGAC_v2_gene10315	mRNA	1536	1
Tp57577_TGAC_v2_gene19482_novel01	Tp57577_TGAC_v2_gene19482	mRNA	400	1
Tp57577_TGAC_v2_mRNA13658	Tp57577_TGAC_v2_gene13219	mRNA	1547	1
Tp57577_TGAC_v2_gene17374_novel04	Tp57577_TGAC_v2_gene17374	mRNA	3928	1
Tp57577_TGAC_v2_gene32107_novel03	Tp57577_TGAC_v2_gene32107	mRNA	771	1
Tp57577_TGAC_v2_gene29947_novel01	Tp57577_TGAC_v2_gene29947	mRNA	2232	1
Tp57577_TGAC_v2_gene30502_novel08	Tp57577_TGAC_v2_gene30502	mRNA	521	1
Tp57577_TGAC_v2_mRNA24658	Tp57577_TGAC_v2_gene23837	mRNA	1268	1
Tp57577_TGAC_v2_gene20698_novel02	Tp57577_TGAC_v2_gene20698	mRNA	488	1
Tp57577_TGAC_v2_gene15588_novel06	Tp57577_TGAC_v2_gene15588	mRNA	449	1
Tp57577_TGAC_v2_gene28165_novel02	Tp57577_TGAC_v2_gene28165	mRNA	691	1
Tp57577_TGAC_v2_mRNA27178	Tp57577_TGAC_v2_gene26279	mRNA	948	1
Tp57577_TGAC_v2_gene21299_novel01	Tp57577_TGAC_v2_gene21299	mRNA	737	1
Tp57577_TGAC_v2_mRNA40138	Tp57577_TGAC_v2_gene38826	mRNA	1211	1
Tp57577_TGAC_v2_gene15923_novel01	Tp57577_TGAC_v2_gene15923	mRNA	375	1
Tp57577_TGAC_v2_gene10633_novel01	Tp57577_TGAC_v2_gene10633	mRNA	1931	1
Tp57577_TGAC_v2_gene21238_novel03	Tp57577_TGAC_v2_gene21238	mRNA	567	1
Tp57577_TGAC_v2_gene38480_novel04	Tp57577_TGAC_v2_gene38480	mRNA	422	1
Tp57577_TGAC_v2_gene25083_novel01	Tp57577_TGAC_v2_gene25083	mRNA	346	1
Tp57577_TGAC_v2_gene24316_novel03	Tp57577_TGAC_v2_gene24316	mRNA	671	1
Tp57577_TGAC_v2_gene24982_novel03	Tp57577_TGAC_v2_gene24982	mRNA	2732	1
Novelgene0980_novel01	Novelgene0980	mRNA	646	1
Tp57577_TGAC_v2_gene31107_novel24	Tp57577_TGAC_v2_gene31107	mRNA	2507	1
Tp57577_TGAC_v2_gene15291_novel01	Tp57577_TGAC_v2_gene15291	mRNA	2822	1
Tp57577_TGAC_v2_gene28385_novel01	Tp57577_TGAC_v2_gene28385	mRNA	758	1
Tp57577_TGAC_v2_mRNA24079	Tp57577_TGAC_v2_gene23284	mRNA	835	1
Tp57577_TGAC_v2_mRNA20059	Tp57577_TGAC_v2_gene19387	mRNA	1464	1
Tp57577_TGAC_v2_gene9446_novel01	Tp57577_TGAC_v2_gene9446	mRNA	639	1
Tp57577_TGAC_v2_mRNA26778	Tp57577_TGAC_v2_gene25894	mRNA	1573	1
Tp57577_TGAC_v2_gene11618_novel01	Tp57577_TGAC_v2_gene11618	mRNA	1519	1
Tp57577_TGAC_v2_mRNA15120	Tp57577_TGAC_v2_gene14630	mRNA	3341	1
Tp57577_TGAC_v2_gene38466_novel01	Tp57577_TGAC_v2_gene38466	mRNA	741	1
Tp57577_TGAC_v2_gene28859_novel02	Tp57577_TGAC_v2_gene28859	mRNA	1723	1
Tp57577_TGAC_v2_mRNA30393	Tp57577_TGAC_v2_gene29383	mRNA	502	1
Tp57577_TGAC_v2_gene29071_novel01	Tp57577_TGAC_v2_gene29071	mRNA	652	1
Tp57577_TGAC_v2_gene16772_novel02	Tp57577_TGAC_v2_gene16772	mRNA	1928	1
Tp57577_TGAC_v2_gene33322_novel01	Tp57577_TGAC_v2_gene33322	mRNA	947	1
Tp57577_TGAC_v2_mRNA18679	Tp57577_TGAC_v2_gene18052	mRNA	494	1
Tp57577_TGAC_v2_mRNA11968	Tp57577_TGAC_v2_gene11593	mRNA	1030	1
Tp57577_TGAC_v2_gene37706_novel03	Tp57577_TGAC_v2_gene37706	mRNA	746	1
Novelgene1019_novel01	Novelgene1019	mRNA	860	1
Tp57577_TGAC_v2_mRNA26583	Tp57577_TGAC_v2_gene25703	mRNA	2339	1
Tp57577_TGAC_v2_gene38686_novel05	Tp57577_TGAC_v2_gene38686	mRNA	388	1
Tp57577_TGAC_v2_gene29052_novel01	Tp57577_TGAC_v2_gene29052	mRNA	994	1
Tp57577_TGAC_v2_gene22817_novel03	Tp57577_TGAC_v2_gene22817	mRNA	2012	1
Tp57577_TGAC_v2_gene19046_novel25	Tp57577_TGAC_v2_gene19046	mRNA	356	1
Tp57577_TGAC_v2_gene3390_novel01	Tp57577_TGAC_v2_gene3390	mRNA	1138	1
Tp57577_TGAC_v2_gene14494_novel01	Tp57577_TGAC_v2_gene14494	mRNA	858	1
Tp57577_TGAC_v2_gene4575_novel01	Tp57577_TGAC_v2_gene4575	mRNA	972	1
Tp57577_TGAC_v2_mRNA18653	Tp57577_TGAC_v2_gene18026	mRNA	712	1
Tp57577_TGAC_v2_gene37629_novel01	Tp57577_TGAC_v2_gene37629	mRNA	568	1
Tp57577_TGAC_v2_gene29416_novel02	Tp57577_TGAC_v2_gene29416	mRNA	1640	1
Novelgene0437_novel01	Novelgene0437	mRNA	512	1
Tp57577_TGAC_v2_gene33398_novel06	Tp57577_TGAC_v2_gene33398	mRNA	476	1
Tp57577_TGAC_v2_gene15292_novel04	Tp57577_TGAC_v2_gene15292	mRNA	1733	1
Tp57577_TGAC_v2_gene6668_novel01	Tp57577_TGAC_v2_gene6668	mRNA	1044	1
Tp57577_TGAC_v2_gene20213_novel01	Tp57577_TGAC_v2_gene20213	mRNA	1952	1
Tp57577_TGAC_v2_mRNA18691	Tp57577_TGAC_v2_gene18064	mRNA	2604	1
Tp57577_TGAC_v2_mRNA38776	Tp57577_TGAC_v2_gene37519	mRNA	1490	1
Tp57577_TGAC_v2_gene39835_novel02	Tp57577_TGAC_v2_gene39835	mRNA	609	1
Tp57577_TGAC_v2_gene39211_novel02	Tp57577_TGAC_v2_gene39211	mRNA	680	1
Tp57577_TGAC_v2_mRNA42140	Tp57577_TGAC_v2_gene40785	mRNA	1012	1
Tp57577_TGAC_v2_gene23276_novel01	Tp57577_TGAC_v2_gene23276	mRNA	2851	1
Tp57577_TGAC_v2_gene12820_novel01	Tp57577_TGAC_v2_gene12820	mRNA	531	1
Tp57577_TGAC_v2_gene26077_novel04	Tp57577_TGAC_v2_gene26077	mRNA	1185	1
Tp57577_TGAC_v2_mRNA6224	Tp57577_TGAC_v2_gene6017	mRNA	1016	1
Novelgene0850_novel01	Novelgene0850	mRNA	1859	1
Tp57577_TGAC_v2_gene2454_novel04	Tp57577_TGAC_v2_gene2454	mRNA	1530	1
Tp57577_TGAC_v2_gene10251_novel05	Tp57577_TGAC_v2_gene10251	mRNA	796	1
Tp57577_TGAC_v2_gene1410_novel01	Tp57577_TGAC_v2_gene1410	mRNA	666	1
Tp57577_TGAC_v2_mRNA35189	Tp57577_TGAC_v2_gene34042	mRNA	610	1
Tp57577_TGAC_v2_gene3290_novel08	Tp57577_TGAC_v2_gene3290	mRNA	5706	1
Tp57577_TGAC_v2_gene21763_novel03	Tp57577_TGAC_v2_gene21763	mRNA	3609	1
Tp57577_TGAC_v2_mRNA40193	Tp57577_TGAC_v2_gene38876	mRNA	2243	1
Tp57577_TGAC_v2_gene25455_novel04	Tp57577_TGAC_v2_gene25455	mRNA	866	1
Tp57577_TGAC_v2_gene31156_novel03	Tp57577_TGAC_v2_gene31156	mRNA	2748	1
Tp57577_TGAC_v2_gene22318_novel01	Tp57577_TGAC_v2_gene22318	mRNA	927	1
Tp57577_TGAC_v2_gene37287_novel02	Tp57577_TGAC_v2_gene37287	mRNA	445	1
Tp57577_TGAC_v2_gene33728_novel01	Tp57577_TGAC_v2_gene33728	mRNA	523	1
Tp57577_TGAC_v2_gene32462_novel05	Tp57577_TGAC_v2_gene32462	mRNA	310	1
Tp57577_TGAC_v2_gene4526_novel01	Tp57577_TGAC_v2_gene4526	mRNA	951	1
Tp57577_TGAC_v2_gene24780_novel01	Tp57577_TGAC_v2_gene24780	mRNA	1448	1
Tp57577_TGAC_v2_gene14526_novel03	Tp57577_TGAC_v2_gene14526	mRNA	1524	1
Tp57577_TGAC_v2_gene2653_novel02	Tp57577_TGAC_v2_gene2653	mRNA	373	1
Tp57577_TGAC_v2_mRNA8028	Tp57577_TGAC_v2_gene7763	mRNA	2304	1
Tp57577_TGAC_v2_mRNA41298	Tp57577_TGAC_v2_gene39949	mRNA	400	1
Tp57577_TGAC_v2_gene25408_novel01	Tp57577_TGAC_v2_gene25408	mRNA	562	1
Tp57577_TGAC_v2_gene12883_novel01	Tp57577_TGAC_v2_gene12883	mRNA	843	1
Tp57577_TGAC_v2_gene38418_novel01	Tp57577_TGAC_v2_gene38418	mRNA	768	1
Tp57577_TGAC_v2_gene8641_novel01	Tp57577_TGAC_v2_gene8641	mRNA	612	1
Tp57577_TGAC_v2_gene32757_novel01	Tp57577_TGAC_v2_gene32757	mRNA	1367	1
Tp57577_TGAC_v2_gene24468_novel06	Tp57577_TGAC_v2_gene24468	mRNA	487	1
Tp57577_TGAC_v2_mRNA21970	Tp57577_TGAC_v2_gene21240	mRNA	904	1
Tp57577_TGAC_v2_gene17315_novel03	Tp57577_TGAC_v2_gene17315	mRNA	1544	1
Novelgene1641_novel01	Novelgene1641	mRNA	958	1
Tp57577_TGAC_v2_gene20156_novel01	Tp57577_TGAC_v2_gene20156	mRNA	496	1
Tp57577_TGAC_v2_mRNA38671	Tp57577_TGAC_v2_gene37415	mRNA	1445	1
Tp57577_TGAC_v2_gene27329_novel02	Tp57577_TGAC_v2_gene27329	mRNA	935	1
Tp57577_TGAC_v2_gene8006_novel01	Tp57577_TGAC_v2_gene8006	mRNA	328	1
Tp57577_TGAC_v2_gene30637_novel05	Tp57577_TGAC_v2_gene30637	mRNA	444	1
Novelgene1509_novel02	Novelgene1509	mRNA	1298	1
Tp57577_TGAC_v2_gene39494_novel01	Tp57577_TGAC_v2_gene39494	mRNA	499	1
Tp57577_TGAC_v2_gene15684_novel21	Tp57577_TGAC_v2_gene15684	mRNA	405	1
Tp57577_TGAC_v2_gene24468_novel04	Tp57577_TGAC_v2_gene24468	mRNA	407	1
Novelgene0539_novel01	Novelgene0539	mRNA	1381	1
Tp57577_TGAC_v2_gene4679_novel02	Tp57577_TGAC_v2_gene4679	mRNA	852	1
Tp57577_TGAC_v2_gene24410_novel01	Tp57577_TGAC_v2_gene24410	mRNA	1925	1
Tp57577_TGAC_v2_gene9333_novel01	Tp57577_TGAC_v2_gene9333	mRNA	1074	1
Tp57577_TGAC_v2_gene4023_novel04	Tp57577_TGAC_v2_gene4023	mRNA	674	1
Tp57577_TGAC_v2_gene12909_novel06	Tp57577_TGAC_v2_gene12909	mRNA	457	1
Tp57577_TGAC_v2_gene3115_novel01	Tp57577_TGAC_v2_gene3115	mRNA	1007	1
Tp57577_TGAC_v2_gene29059_novel01	Tp57577_TGAC_v2_gene29059	mRNA	1167	1
Tp57577_TGAC_v2_gene13832_novel01	Tp57577_TGAC_v2_gene13832	mRNA	1674	1
Tp57577_TGAC_v2_gene12558_novel12	Tp57577_TGAC_v2_gene12558	mRNA	366	1
Tp57577_TGAC_v2_gene26452_novel03	Tp57577_TGAC_v2_gene26452	mRNA	1243	1
Tp57577_TGAC_v2_gene35661_novel01	Tp57577_TGAC_v2_gene35661	mRNA	842	1
Tp57577_TGAC_v2_gene2668_novel01	Tp57577_TGAC_v2_gene2668	mRNA	470	1
Tp57577_TGAC_v2_gene16108_novel01	Tp57577_TGAC_v2_gene16108	mRNA	611	1
Tp57577_TGAC_v2_gene10330_novel02	Tp57577_TGAC_v2_gene10330	mRNA	488	1
Tp57577_TGAC_v2_gene38014_novel01	Tp57577_TGAC_v2_gene38014	mRNA	638	1
Tp57577_TGAC_v2_mRNA35654	Tp57577_TGAC_v2_gene34482	mRNA	2272	1
Tp57577_TGAC_v2_gene37204_novel01	Tp57577_TGAC_v2_gene37204	mRNA	433	1
Novelgene1365_novel01	Novelgene1365	mRNA	1548	1
Tp57577_TGAC_v2_gene5360_novel02	Tp57577_TGAC_v2_gene5360	mRNA	837	1
Tp57577_TGAC_v2_gene13314_novel01	Tp57577_TGAC_v2_gene13314	mRNA	1681	1
Tp57577_TGAC_v2_mRNA34653	Tp57577_TGAC_v2_gene33522	mRNA	1042	1
Tp57577_TGAC_v2_gene34926_novel01	Tp57577_TGAC_v2_gene34926	mRNA	389	1
Tp57577_TGAC_v2_gene34892_novel08	Tp57577_TGAC_v2_gene34892	mRNA	1393	1
Tp57577_TGAC_v2_gene25703_novel01	Tp57577_TGAC_v2_gene25703	mRNA	617	1
Tp57577_TGAC_v2_gene2291_novel01	Tp57577_TGAC_v2_gene2291	mRNA	779	1
Tp57577_TGAC_v2_gene19618_novel01	Tp57577_TGAC_v2_gene19618	mRNA	1772	1
Tp57577_TGAC_v2_gene8220_novel02	Tp57577_TGAC_v2_gene8220	mRNA	575	1
Tp57577_TGAC_v2_gene29093_novel01	Tp57577_TGAC_v2_gene29093	mRNA	699	1
Tp57577_TGAC_v2_gene32573_novel01	Tp57577_TGAC_v2_gene32573	mRNA	3198	1
Tp57577_TGAC_v2_gene38986_novel01	Tp57577_TGAC_v2_gene38986	mRNA	588	1
Tp57577_TGAC_v2_gene35420_novel02	Tp57577_TGAC_v2_gene35420	mRNA	616	1
Tp57577_TGAC_v2_gene37355_novel01	Tp57577_TGAC_v2_gene37355	mRNA	594	1
Tp57577_TGAC_v2_gene27202_novel01	Tp57577_TGAC_v2_gene27202	mRNA	601	1
Tp57577_TGAC_v2_gene36793_novel05	Tp57577_TGAC_v2_gene36793	mRNA	982	1
Tp57577_TGAC_v2_gene37631_novel05	Tp57577_TGAC_v2_gene37631	mRNA	588	1
Tp57577_TGAC_v2_gene24726_novel03	Tp57577_TGAC_v2_gene24726	mRNA	465	1
Novelgene1292_novel01	Novelgene1292	mRNA	347	1
Tp57577_TGAC_v2_gene27982_novel01	Tp57577_TGAC_v2_gene27982	mRNA	427	1
Tp57577_TGAC_v2_mRNA14240	Tp57577_TGAC_v2_gene13784	mRNA	1768	1
Tp57577_TGAC_v2_mRNA19024	Tp57577_TGAC_v2_gene18382	mRNA	469	1
Novelgene0753_novel01	Novelgene0753	mRNA	226	1
Novelgene0768_novel01	Novelgene0768	mRNA	485	1
Tp57577_TGAC_v2_gene1061_novel02	Tp57577_TGAC_v2_gene1061	mRNA	970	1
Novelgene1273_novel01	Novelgene1273	mRNA	1984	1
Tp57577_TGAC_v2_gene4448_novel03	Tp57577_TGAC_v2_gene4448	mRNA	462	1
Tp57577_TGAC_v2_gene11822_novel03	Tp57577_TGAC_v2_gene11822	mRNA	771	1
Tp57577_TGAC_v2_gene3051_novel01	Tp57577_TGAC_v2_gene3051	mRNA	1057	1
Tp57577_TGAC_v2_gene30775_novel01	Tp57577_TGAC_v2_gene30775	mRNA	932	1
Tp57577_TGAC_v2_mRNA37126	Tp57577_TGAC_v2_gene35911	mRNA	674	1
Novelgene0032_novel01	Novelgene0032	mRNA	5025	1
Tp57577_TGAC_v2_gene14614_novel01	Tp57577_TGAC_v2_gene14614	mRNA	652	1
Tp57577_TGAC_v2_gene27464_novel01	Tp57577_TGAC_v2_gene27464	mRNA	450	1
Tp57577_TGAC_v2_mRNA38589	Tp57577_TGAC_v2_gene37338	mRNA	2293	1
Tp57577_TGAC_v2_gene4545_novel03	Tp57577_TGAC_v2_gene4545	mRNA	2295	1
Novelgene0219_novel01	Novelgene0219	mRNA	599	1
Tp57577_TGAC_v2_gene12202_novel01	Tp57577_TGAC_v2_gene12202	mRNA	924	1
Tp57577_TGAC_v2_gene14472_novel02	Tp57577_TGAC_v2_gene14472	mRNA	1889	1
Tp57577_TGAC_v2_gene15055_novel03	Tp57577_TGAC_v2_gene15055	mRNA	834	1
Tp57577_TGAC_v2_gene7738_novel01	Tp57577_TGAC_v2_gene7738	mRNA	571	1
Tp57577_TGAC_v2_gene1919_novel02	Tp57577_TGAC_v2_gene1919	mRNA	1561	1
Tp57577_TGAC_v2_gene35882_novel06	Tp57577_TGAC_v2_gene35882	mRNA	539	1
Novelgene0342_novel01	Novelgene0342	mRNA	1177	1
Tp57577_TGAC_v2_mRNA11774	Tp57577_TGAC_v2_gene11402	mRNA	461	1
Tp57577_TGAC_v2_gene1496_novel01	Tp57577_TGAC_v2_gene1496	mRNA	703	1
Tp57577_TGAC_v2_gene29504_novel02	Tp57577_TGAC_v2_gene29504	mRNA	748	1
Tp57577_TGAC_v2_gene37879_novel02	Tp57577_TGAC_v2_gene37879	mRNA	767	1
Tp57577_TGAC_v2_mRNA19758	Tp57577_TGAC_v2_gene19099	mRNA	3742	1
Tp57577_TGAC_v2_gene30882_novel02	Tp57577_TGAC_v2_gene30882	mRNA	523	1
Tp57577_TGAC_v2_gene6537_novel01	Tp57577_TGAC_v2_gene6537	mRNA	656	1
Novelgene1426_novel01	Novelgene1426	mRNA	564	1
Tp57577_TGAC_v2_mRNA23386	Tp57577_TGAC_v2_gene22611	mRNA	775	1
Tp57577_TGAC_v2_gene33499_novel01	Tp57577_TGAC_v2_gene33499	mRNA	3945	1
Tp57577_TGAC_v2_mRNA11021	Tp57577_TGAC_v2_gene10665	mRNA	768	1
Tp57577_TGAC_v2_gene12999_novel01	Tp57577_TGAC_v2_gene12999	mRNA	347	1
Tp57577_TGAC_v2_gene1507_novel02	Tp57577_TGAC_v2_gene1507	mRNA	761	1
Tp57577_TGAC_v2_mRNA24671	Tp57577_TGAC_v2_gene23850	mRNA	2760	1
Tp57577_TGAC_v2_gene21288_novel05	Tp57577_TGAC_v2_gene21288	mRNA	728	1
Novelgene0007_novel01	Novelgene0007	mRNA	1418	1
Tp57577_TGAC_v2_gene3380_novel02	Tp57577_TGAC_v2_gene3380	mRNA	928	1
Tp57577_TGAC_v2_gene22747_novel01	Tp57577_TGAC_v2_gene22747	mRNA	811	1
Tp57577_TGAC_v2_gene28596_novel04	Tp57577_TGAC_v2_gene28596	mRNA	376	1
Tp57577_TGAC_v2_gene10358_novel01	Tp57577_TGAC_v2_gene10358	mRNA	445	1
Tp57577_TGAC_v2_mRNA33281	Tp57577_TGAC_v2_gene32205	mRNA	1243	1
Tp57577_TGAC_v2_gene11818_novel01	Tp57577_TGAC_v2_gene11818	mRNA	607	1
Tp57577_TGAC_v2_gene20793_novel02	Tp57577_TGAC_v2_gene20793	mRNA	1396	1
Tp57577_TGAC_v2_gene12664_novel01	Tp57577_TGAC_v2_gene12664	mRNA	959	1
Tp57577_TGAC_v2_mRNA32490	Tp57577_TGAC_v2_gene31431	mRNA	620	1
Novelgene0888_novel01	Novelgene0888	mRNA	1237	1
Tp57577_TGAC_v2_gene2753_novel01	Tp57577_TGAC_v2_gene2753	mRNA	562	1
Tp57577_TGAC_v2_gene15616_novel03	Tp57577_TGAC_v2_gene15616	mRNA	584	1
Tp57577_TGAC_v2_gene27308_novel01	Tp57577_TGAC_v2_gene27308	mRNA	3612	1
Tp57577_TGAC_v2_gene37849_novel01	Tp57577_TGAC_v2_gene37849	mRNA	949	1
Tp57577_TGAC_v2_gene22911_novel01	Tp57577_TGAC_v2_gene22911	mRNA	1224	1
Tp57577_TGAC_v2_gene19163_novel03	Tp57577_TGAC_v2_gene19163	mRNA	859	1
Tp57577_TGAC_v2_gene16918_novel02	Tp57577_TGAC_v2_gene16918	mRNA	827	1
Tp57577_TGAC_v2_gene9870_novel01	Tp57577_TGAC_v2_gene9870	mRNA	629	1
Tp57577_TGAC_v2_gene8496_novel01	Tp57577_TGAC_v2_gene8496	mRNA	601	1
Tp57577_TGAC_v2_gene27480_novel03	Tp57577_TGAC_v2_gene27480	mRNA	3181	1
Tp57577_TGAC_v2_gene19786_novel01	Tp57577_TGAC_v2_gene19786	mRNA	2518	1
Tp57577_TGAC_v2_gene22426_novel04	Tp57577_TGAC_v2_gene22426	mRNA	469	1
Tp57577_TGAC_v2_mRNA20695	Tp57577_TGAC_v2_gene20003	mRNA	895	1
Tp57577_TGAC_v2_gene23250_novel01	Tp57577_TGAC_v2_gene23250	mRNA	1106	1
Tp57577_TGAC_v2_gene4623_novel03	Tp57577_TGAC_v2_gene4623	mRNA	605	1
Tp57577_TGAC_v2_gene13256_novel06	Tp57577_TGAC_v2_gene13256	mRNA	444	1
Tp57577_TGAC_v2_mRNA41767	Tp57577_TGAC_v2_gene40415	mRNA	680	1
Tp57577_TGAC_v2_mRNA3598	Tp57577_TGAC_v2_gene3499	mRNA	1591	1
Tp57577_TGAC_v2_gene6423_novel02	Tp57577_TGAC_v2_gene6423	mRNA	420	1
Tp57577_TGAC_v2_gene26661_novel04	Tp57577_TGAC_v2_gene26661	mRNA	593	1
Tp57577_TGAC_v2_gene15188_novel01	Tp57577_TGAC_v2_gene15188	mRNA	1432	1
Tp57577_TGAC_v2_gene39518_novel01	Tp57577_TGAC_v2_gene39518	mRNA	473	1
Tp57577_TGAC_v2_gene35718_novel02	Tp57577_TGAC_v2_gene35718	mRNA	1871	1
Tp57577_TGAC_v2_gene4793_novel01	Tp57577_TGAC_v2_gene4793	mRNA	711	1
Tp57577_TGAC_v2_gene26399_novel01	Tp57577_TGAC_v2_gene26399	mRNA	982	1
Tp57577_TGAC_v2_gene33360_novel01	Tp57577_TGAC_v2_gene33360	mRNA	763	1
Tp57577_TGAC_v2_gene14370_novel02	Tp57577_TGAC_v2_gene14370	mRNA	3564	1
Tp57577_TGAC_v2_gene30347_novel01	Tp57577_TGAC_v2_gene30347	mRNA	563	1
Tp57577_TGAC_v2_gene31977_novel01	Tp57577_TGAC_v2_gene31977	mRNA	1397	1
Tp57577_TGAC_v2_gene30361_novel01	Tp57577_TGAC_v2_gene30361	mRNA	367	1
Tp57577_TGAC_v2_mRNA36474	Tp57577_TGAC_v2_gene35275	mRNA	427	1
Novelgene0784_novel01	Novelgene0784	mRNA	846	1
Tp57577_TGAC_v2_gene13770_novel04	Tp57577_TGAC_v2_gene13770	mRNA	306	1
Tp57577_TGAC_v2_gene10476_novel02	Tp57577_TGAC_v2_gene10476	mRNA	1160	1
Tp57577_TGAC_v2_mRNA37232	Tp57577_TGAC_v2_gene36015	mRNA	1532	1
Tp57577_TGAC_v2_gene10078_novel01	Tp57577_TGAC_v2_gene10078	mRNA	974	1
Tp57577_TGAC_v2_gene4317_novel01	Tp57577_TGAC_v2_gene4317	mRNA	491	1
Tp57577_TGAC_v2_mRNA23224	Tp57577_TGAC_v2_gene22453	mRNA	1869	1
Novelgene1091_novel01	Novelgene1091	mRNA	411	1
Tp57577_TGAC_v2_mRNA7347	Tp57577_TGAC_v2_gene7098	mRNA	553	1
Tp57577_TGAC_v2_gene34239_novel01	Tp57577_TGAC_v2_gene34239	mRNA	405	1
Tp57577_TGAC_v2_gene18060_novel01	Tp57577_TGAC_v2_gene18060	mRNA	1627	1
Tp57577_TGAC_v2_gene2557_novel01	Tp57577_TGAC_v2_gene2557	mRNA	758	1
Tp57577_TGAC_v2_mRNA15372	Tp57577_TGAC_v2_gene14875	mRNA	571	1
Tp57577_TGAC_v2_gene11782_novel01	Tp57577_TGAC_v2_gene11782	mRNA	2199	1
Tp57577_TGAC_v2_gene8734_novel06	Tp57577_TGAC_v2_gene8734	mRNA	887	1
Tp57577_TGAC_v2_mRNA37981	Tp57577_TGAC_v2_gene36753	mRNA	878	1
Tp57577_TGAC_v2_gene11149_novel01	Tp57577_TGAC_v2_gene11149	mRNA	615	1
Tp57577_TGAC_v2_gene22566_novel01	Tp57577_TGAC_v2_gene22566	mRNA	546	1
Tp57577_TGAC_v2_gene35620_novel02	Tp57577_TGAC_v2_gene35620	mRNA	437	1
Tp57577_TGAC_v2_gene38831_novel03	Tp57577_TGAC_v2_gene38831	mRNA	2747	1
Tp57577_TGAC_v2_gene25472_novel01	Tp57577_TGAC_v2_gene25472	mRNA	394	1
Tp57577_TGAC_v2_gene38501_novel03	Tp57577_TGAC_v2_gene38501	mRNA	884	1
Tp57577_TGAC_v2_gene5808_novel01	Tp57577_TGAC_v2_gene5808	mRNA	2325	1
Novelgene0332_novel01	Novelgene0332	mRNA	1342	1
Tp57577_TGAC_v2_gene25482_novel03	Tp57577_TGAC_v2_gene25482	mRNA	432	1
Novelgene0865_novel01	Novelgene0865	mRNA	551	1
Tp57577_TGAC_v2_gene4613_novel02	Tp57577_TGAC_v2_gene4613	mRNA	383	1
Novelgene0215_novel01	Novelgene0215	mRNA	1780	1
Tp57577_TGAC_v2_gene20158_novel01	Tp57577_TGAC_v2_gene20158	mRNA	1196	1
Tp57577_TGAC_v2_gene5750_novel02	Tp57577_TGAC_v2_gene5750	mRNA	685	1
Novelgene1584_novel02	Novelgene1584	mRNA	3087	1
Novelgene1608_novel02	Novelgene1608	mRNA	959	1
Tp57577_TGAC_v2_gene16940_novel01	Tp57577_TGAC_v2_gene16940	mRNA	1002	1
Tp57577_TGAC_v2_gene30012_novel01	Tp57577_TGAC_v2_gene30012	mRNA	682	1
Tp57577_TGAC_v2_mRNA40581	Tp57577_TGAC_v2_gene39243	mRNA	2209	1
Tp57577_TGAC_v2_gene35240_novel01	Tp57577_TGAC_v2_gene35240	mRNA	346	1
Tp57577_TGAC_v2_gene20986_novel02	Tp57577_TGAC_v2_gene20986	mRNA	561	1
Tp57577_TGAC_v2_gene1331_novel01	Tp57577_TGAC_v2_gene1331	mRNA	817	1
Novelgene1226_novel01	Novelgene1226	mRNA	695	1
Tp57577_TGAC_v2_gene33365_novel01	Tp57577_TGAC_v2_gene33365	mRNA	1133	1
Tp57577_TGAC_v2_gene31618_novel03	Tp57577_TGAC_v2_gene31618	mRNA	965	1
Tp57577_TGAC_v2_mRNA5584	Tp57577_TGAC_v2_gene5398	mRNA	1247	1
Tp57577_TGAC_v2_gene14943_novel03	Tp57577_TGAC_v2_gene14943	mRNA	621	1
Tp57577_TGAC_v2_gene37542_novel01	Tp57577_TGAC_v2_gene37542	mRNA	2381	1
Novelgene0800_novel01	Novelgene0800	mRNA	1146	1
Tp57577_TGAC_v2_gene25292_novel01	Tp57577_TGAC_v2_gene25292	mRNA	504	1
Tp57577_TGAC_v2_gene6829_novel02	Tp57577_TGAC_v2_gene6829	mRNA	416	1
Tp57577_TGAC_v2_gene8951_novel01	Tp57577_TGAC_v2_gene8951	mRNA	503	1
Tp57577_TGAC_v2_mRNA26253	Tp57577_TGAC_v2_gene25390	mRNA	665	1
Tp57577_TGAC_v2_gene21763_novel05	Tp57577_TGAC_v2_gene21763	mRNA	1478	1
Tp57577_TGAC_v2_mRNA38585	Tp57577_TGAC_v2_gene37334	mRNA	851	1
Tp57577_TGAC_v2_mRNA31437	Tp57577_TGAC_v2_gene30406	mRNA	1451	1
Tp57577_TGAC_v2_gene17479_novel01	Tp57577_TGAC_v2_gene17479	mRNA	892	1
Tp57577_TGAC_v2_gene19367_novel08	Tp57577_TGAC_v2_gene19367	mRNA	348	1
Tp57577_TGAC_v2_gene8723_novel03	Tp57577_TGAC_v2_gene8723	mRNA	916	1
Tp57577_TGAC_v2_gene33847_novel02	Tp57577_TGAC_v2_gene33847	mRNA	656	1
Tp57577_TGAC_v2_gene31504_novel01	Tp57577_TGAC_v2_gene31504	mRNA	543	1
Tp57577_TGAC_v2_mRNA21822	Tp57577_TGAC_v2_gene21100	mRNA	755	1
Tp57577_TGAC_v2_gene28633_novel01	Tp57577_TGAC_v2_gene28633	mRNA	977	1
Tp57577_TGAC_v2_mRNA13451	Tp57577_TGAC_v2_gene13020	mRNA	707	1
Tp57577_TGAC_v2_mRNA3212	Tp57577_TGAC_v2_gene3122	mRNA	1673	1
Tp57577_TGAC_v2_gene10730_novel02	Tp57577_TGAC_v2_gene10730	mRNA	840	1
Tp57577_TGAC_v2_gene24869_novel06	Tp57577_TGAC_v2_gene24869	mRNA	461	1
Novelgene0909_novel01	Novelgene0909	mRNA	395	1
Tp57577_TGAC_v2_mRNA40619	Tp57577_TGAC_v2_gene39279	mRNA	2239	1
Tp57577_TGAC_v2_gene28840_novel03	Tp57577_TGAC_v2_gene28840	mRNA	1518	1
Tp57577_TGAC_v2_gene14932_novel02	Tp57577_TGAC_v2_gene14932	mRNA	675	1
Tp57577_TGAC_v2_gene9410_novel01	Tp57577_TGAC_v2_gene9410	mRNA	544	1
Novelgene1153_novel02	Novelgene1153	mRNA	1576	1
Novelgene1758_novel01	Novelgene1758	mRNA	995	1
Tp57577_TGAC_v2_gene5912_novel01	Tp57577_TGAC_v2_gene5912	mRNA	612	1
Tp57577_TGAC_v2_gene2117_novel02	Tp57577_TGAC_v2_gene2117	mRNA	599	1
Tp57577_TGAC_v2_gene16943_novel01	Tp57577_TGAC_v2_gene16943	mRNA	374	1
Tp57577_TGAC_v2_gene19115_novel02	Tp57577_TGAC_v2_gene19115	mRNA	1342	1
Tp57577_TGAC_v2_mRNA33944	Tp57577_TGAC_v2_gene32840	mRNA	827	1
Novelgene0400_novel01	Novelgene0400	mRNA	1499	1
Tp57577_TGAC_v2_mRNA23777	Tp57577_TGAC_v2_gene22990	mRNA	914	1
Tp57577_TGAC_v2_gene16756_novel02	Tp57577_TGAC_v2_gene16756	mRNA	1111	1
Tp57577_TGAC_v2_gene13070_novel01	Tp57577_TGAC_v2_gene13070	mRNA	1679	1
Tp57577_TGAC_v2_gene11269_novel14	Tp57577_TGAC_v2_gene11269	mRNA	670	1
Tp57577_TGAC_v2_mRNA29643	Tp57577_TGAC_v2_gene28676	mRNA	748	1
Tp57577_TGAC_v2_gene24957_novel01	Tp57577_TGAC_v2_gene24957	mRNA	3651	1
Tp57577_TGAC_v2_gene16135_novel01	Tp57577_TGAC_v2_gene16135	mRNA	619	1
Novelgene0495_novel01	Novelgene0495	mRNA	1266	1
Tp57577_TGAC_v2_gene20090_novel02	Tp57577_TGAC_v2_gene20090	mRNA	842	1
Tp57577_TGAC_v2_mRNA831	Tp57577_TGAC_v2_gene825	mRNA	1066	1
Tp57577_TGAC_v2_gene37095_novel02	Tp57577_TGAC_v2_gene37095	mRNA	869	1
Tp57577_TGAC_v2_mRNA7969	Tp57577_TGAC_v2_gene7704	mRNA	887	1
Tp57577_TGAC_v2_gene13865_novel01	Tp57577_TGAC_v2_gene13865	mRNA	1178	1
Tp57577_TGAC_v2_gene17346_novel03	Tp57577_TGAC_v2_gene17346	mRNA	349	1
Tp57577_TGAC_v2_mRNA12026	Tp57577_TGAC_v2_gene11650	mRNA	843	1
Tp57577_TGAC_v2_gene28717_novel03	Tp57577_TGAC_v2_gene28717	mRNA	983	1
Tp57577_TGAC_v2_gene24872_novel01	Tp57577_TGAC_v2_gene24872	mRNA	381	1
Tp57577_TGAC_v2_gene40481_novel01	Tp57577_TGAC_v2_gene40481	mRNA	706	1
Tp57577_TGAC_v2_mRNA39157	Tp57577_TGAC_v2_gene37877	mRNA	583	1
Tp57577_TGAC_v2_gene8165_novel03	Tp57577_TGAC_v2_gene8165	mRNA	481	1
Tp57577_TGAC_v2_gene5135_novel02	Tp57577_TGAC_v2_gene5135	mRNA	2330	1
Tp57577_TGAC_v2_mRNA14586	Tp57577_TGAC_v2_gene14113	mRNA	2158	1
Tp57577_TGAC_v2_gene30554_novel01	Tp57577_TGAC_v2_gene30554	mRNA	564	1
Tp57577_TGAC_v2_gene13431_novel01	Tp57577_TGAC_v2_gene13431	mRNA	507	1
Tp57577_TGAC_v2_mRNA4723	Tp57577_TGAC_v2_gene4575	mRNA	1363	1
Novelgene0694_novel01	Novelgene0694	mRNA	3309	1
Tp57577_TGAC_v2_gene29037_novel06	Tp57577_TGAC_v2_gene29037	mRNA	612	1
Tp57577_TGAC_v2_gene37542_novel02	Tp57577_TGAC_v2_gene37542	mRNA	739	1
Tp57577_TGAC_v2_gene14943_novel01	Tp57577_TGAC_v2_gene14943	mRNA	2718	1
Tp57577_TGAC_v2_gene17369_novel02	Tp57577_TGAC_v2_gene17369	mRNA	732	1
Tp57577_TGAC_v2_gene39061_novel01	Tp57577_TGAC_v2_gene39061	mRNA	553	1
Tp57577_TGAC_v2_gene32233_novel01	Tp57577_TGAC_v2_gene32233	mRNA	1278	1
Tp57577_TGAC_v2_gene7007_novel02	Tp57577_TGAC_v2_gene7007	mRNA	836	1
Novelgene0354_novel01	Novelgene0354	mRNA	2005	1
Tp57577_TGAC_v2_gene33049_novel02	Tp57577_TGAC_v2_gene33049	mRNA	295	1
Tp57577_TGAC_v2_gene21412_novel01	Tp57577_TGAC_v2_gene21412	mRNA	877	1
Novelgene0485_novel01	Novelgene0485	mRNA	995	1
Tp57577_TGAC_v2_gene21580_novel09	Tp57577_TGAC_v2_gene21580	mRNA	1665	1
Tp57577_TGAC_v2_gene20793_novel01	Tp57577_TGAC_v2_gene20793	mRNA	724	1
Tp57577_TGAC_v2_mRNA11607	Tp57577_TGAC_v2_gene11245	mRNA	810	1
Novelgene0560_novel01	Novelgene0560	mRNA	405	1
Tp57577_TGAC_v2_gene11215_novel04	Tp57577_TGAC_v2_gene11215	mRNA	704	1
Tp57577_TGAC_v2_gene1029_novel01	Tp57577_TGAC_v2_gene1029	mRNA	864	1
Tp57577_TGAC_v2_gene35478_novel03	Tp57577_TGAC_v2_gene35478	mRNA	868	1
Tp57577_TGAC_v2_mRNA17433	Tp57577_TGAC_v2_gene16850	mRNA	562	1
Tp57577_TGAC_v2_gene32205_novel01	Tp57577_TGAC_v2_gene32205	mRNA	550	1
Tp57577_TGAC_v2_mRNA40225	Tp57577_TGAC_v2_gene38908	mRNA	577	1
Tp57577_TGAC_v2_gene16508_novel04	Tp57577_TGAC_v2_gene16508	mRNA	387	1
Tp57577_TGAC_v2_mRNA29420	Tp57577_TGAC_v2_gene28458	mRNA	3040	1
Tp57577_TGAC_v2_gene19597_novel03	Tp57577_TGAC_v2_gene19597	mRNA	1091	1
Tp57577_TGAC_v2_gene5277_novel01	Tp57577_TGAC_v2_gene5277	mRNA	395	1
Tp57577_TGAC_v2_gene3198_novel01	Tp57577_TGAC_v2_gene3198	mRNA	1517	1
Tp57577_TGAC_v2_gene20162_novel01	Tp57577_TGAC_v2_gene20162	mRNA	620	1
Tp57577_TGAC_v2_gene12869_novel02	Tp57577_TGAC_v2_gene12869	mRNA	442	1
Tp57577_TGAC_v2_gene35715_novel01	Tp57577_TGAC_v2_gene35715	mRNA	1168	1
Tp57577_TGAC_v2_gene33407_novel05	Tp57577_TGAC_v2_gene33407	mRNA	471	1
Tp57577_TGAC_v2_gene8994_novel03	Tp57577_TGAC_v2_gene8994	mRNA	539	1
Tp57577_TGAC_v2_gene16407_novel03	Tp57577_TGAC_v2_gene16407	mRNA	2728	1
Novelgene1503_novel01	Novelgene1503	mRNA	1683	1
Tp57577_TGAC_v2_gene4342_novel01	Tp57577_TGAC_v2_gene4342	mRNA	936	1
Tp57577_TGAC_v2_gene12329_novel01	Tp57577_TGAC_v2_gene12329	mRNA	1306	1
Tp57577_TGAC_v2_mRNA36443	Tp57577_TGAC_v2_gene35246	mRNA	619	1
Tp57577_TGAC_v2_gene16132_novel01	Tp57577_TGAC_v2_gene16132	mRNA	1221	1
Tp57577_TGAC_v2_gene11687_novel02	Tp57577_TGAC_v2_gene11687	mRNA	577	1
Tp57577_TGAC_v2_mRNA10947	Tp57577_TGAC_v2_gene10593	mRNA	883	1
Tp57577_TGAC_v2_gene7544_novel05	Tp57577_TGAC_v2_gene7544	mRNA	761	1
Tp57577_TGAC_v2_gene26945_novel01	Tp57577_TGAC_v2_gene26945	mRNA	788	1
Tp57577_TGAC_v2_gene33561_novel01	Tp57577_TGAC_v2_gene33561	mRNA	2919	1
Tp57577_TGAC_v2_gene1995_novel01	Tp57577_TGAC_v2_gene1995	mRNA	2416	1
Tp57577_TGAC_v2_gene30897_novel01	Tp57577_TGAC_v2_gene30897	mRNA	2179	1
Tp57577_TGAC_v2_gene35217_novel04	Tp57577_TGAC_v2_gene35217	mRNA	2003	1
Tp57577_TGAC_v2_mRNA35300	Tp57577_TGAC_v2_gene34152	mRNA	796	1
Tp57577_TGAC_v2_mRNA33715	Tp57577_TGAC_v2_gene32616	mRNA	558	1
Tp57577_TGAC_v2_gene3848_novel01	Tp57577_TGAC_v2_gene3848	mRNA	505	1
Tp57577_TGAC_v2_gene37391_novel01	Tp57577_TGAC_v2_gene37391	mRNA	307	1
Tp57577_TGAC_v2_gene21466_novel02	Tp57577_TGAC_v2_gene21466	mRNA	3131	1
Tp57577_TGAC_v2_gene22812_novel02	Tp57577_TGAC_v2_gene22812	mRNA	713	1
Tp57577_TGAC_v2_gene4081_novel03	Tp57577_TGAC_v2_gene4081	mRNA	1698	1
Tp57577_TGAC_v2_mRNA23600	Tp57577_TGAC_v2_gene22818	mRNA	914	1
Tp57577_TGAC_v2_gene5411_novel01	Tp57577_TGAC_v2_gene5411	mRNA	3138	1
Tp57577_TGAC_v2_gene7029_novel01	Tp57577_TGAC_v2_gene7029	mRNA	414	1
Tp57577_TGAC_v2_gene33159_novel03	Tp57577_TGAC_v2_gene33159	mRNA	1019	1
Tp57577_TGAC_v2_gene18645_novel08	Tp57577_TGAC_v2_gene18645	mRNA	461	1
Tp57577_TGAC_v2_gene22880_novel01	Tp57577_TGAC_v2_gene22880	mRNA	471	1
Tp57577_TGAC_v2_gene9254_novel02	Tp57577_TGAC_v2_gene9254	mRNA	1337	1
Tp57577_TGAC_v2_mRNA2767	Tp57577_TGAC_v2_gene2694	mRNA	810	1
Tp57577_TGAC_v2_mRNA9547	Tp57577_TGAC_v2_gene9240	mRNA	1256	1
Tp57577_TGAC_v2_gene16549_novel05	Tp57577_TGAC_v2_gene16549	mRNA	846	1
Tp57577_TGAC_v2_gene2524_novel01	Tp57577_TGAC_v2_gene2524	mRNA	5891	1
Tp57577_TGAC_v2_gene18511_novel01	Tp57577_TGAC_v2_gene18511	mRNA	1823	1
Novelgene0767_novel01	Novelgene0767	mRNA	3101	1
Tp57577_TGAC_v2_gene15499_novel01	Tp57577_TGAC_v2_gene15499	mRNA	1216	1
Tp57577_TGAC_v2_gene2937_novel12	Tp57577_TGAC_v2_gene2937	mRNA	1872	1
Tp57577_TGAC_v2_gene36810_novel02	Tp57577_TGAC_v2_gene36810	mRNA	1015	1
Tp57577_TGAC_v2_mRNA220	Tp57577_TGAC_v2_gene220	mRNA	454	1
Tp57577_TGAC_v2_gene37519_novel01	Tp57577_TGAC_v2_gene37519	mRNA	698	1
Tp57577_TGAC_v2_gene36856_novel03	Tp57577_TGAC_v2_gene36856	mRNA	1129	1
Tp57577_TGAC_v2_mRNA15572	Tp57577_TGAC_v2_gene15070	mRNA	519	1
Tp57577_TGAC_v2_gene20216_novel07	Tp57577_TGAC_v2_gene20216	mRNA	371	1
Tp57577_TGAC_v2_mRNA34720	Tp57577_TGAC_v2_gene33587	mRNA	1583	1
Tp57577_TGAC_v2_gene7498_novel01	Tp57577_TGAC_v2_gene7498	mRNA	443	1
Tp57577_TGAC_v2_gene35504_novel01	Tp57577_TGAC_v2_gene35504	mRNA	752	1
Tp57577_TGAC_v2_gene38582_novel02	Tp57577_TGAC_v2_gene38582	mRNA	532	1
Tp57577_TGAC_v2_gene36719_novel01	Tp57577_TGAC_v2_gene36719	mRNA	1213	1
Tp57577_TGAC_v2_gene15401_novel01	Tp57577_TGAC_v2_gene15401	mRNA	2959	1
Tp57577_TGAC_v2_gene28778_novel01	Tp57577_TGAC_v2_gene28778	mRNA	389	1
Tp57577_TGAC_v2_gene8599_novel01	Tp57577_TGAC_v2_gene8599	mRNA	738	1
Tp57577_TGAC_v2_gene32457_novel01	Tp57577_TGAC_v2_gene32457	mRNA	1688	1
Tp57577_TGAC_v2_gene4419_novel01	Tp57577_TGAC_v2_gene4419	mRNA	1037	1
Tp57577_TGAC_v2_gene35560_novel06	Tp57577_TGAC_v2_gene35560	mRNA	774	1
Tp57577_TGAC_v2_gene30890_novel02	Tp57577_TGAC_v2_gene30890	mRNA	1123	1
Tp57577_TGAC_v2_gene6839_novel01	Tp57577_TGAC_v2_gene6839	mRNA	523	1
Tp57577_TGAC_v2_mRNA2597	Tp57577_TGAC_v2_gene2526	mRNA	526	1
Tp57577_TGAC_v2_gene11480_novel01	Tp57577_TGAC_v2_gene11480	mRNA	510	1
Tp57577_TGAC_v2_gene32332_novel01	Tp57577_TGAC_v2_gene32332	mRNA	585	1
Tp57577_TGAC_v2_gene12399_novel01	Tp57577_TGAC_v2_gene12399	mRNA	842	1
Tp57577_TGAC_v2_gene11512_novel02	Tp57577_TGAC_v2_gene11512	mRNA	472	1
Tp57577_TGAC_v2_gene24965_novel01	Tp57577_TGAC_v2_gene24965	mRNA	690	1
Tp57577_TGAC_v2_gene5653_novel01	Tp57577_TGAC_v2_gene5653	mRNA	3129	1
Tp57577_TGAC_v2_gene9601_novel03	Tp57577_TGAC_v2_gene9601	mRNA	3405	1
Novelgene0490_novel01	Novelgene0490	mRNA	239	1
Tp57577_TGAC_v2_gene11960_novel01	Tp57577_TGAC_v2_gene11960	mRNA	1596	1
Tp57577_TGAC_v2_mRNA38723	Tp57577_TGAC_v2_gene37466	mRNA	2333	1
Tp57577_TGAC_v2_mRNA36980	Tp57577_TGAC_v2_gene35767	mRNA	1907	1
Novelgene0973_novel01	Novelgene0973	mRNA	523	1
Tp57577_TGAC_v2_gene9652_novel02	Tp57577_TGAC_v2_gene9652	mRNA	532	1
Tp57577_TGAC_v2_mRNA17407	Tp57577_TGAC_v2_gene16824	mRNA	633	1
Novelgene0693_novel01	Novelgene0693	mRNA	1418	1
Tp57577_TGAC_v2_gene6722_novel04	Tp57577_TGAC_v2_gene6722	mRNA	516	1
Tp57577_TGAC_v2_gene25442_novel03	Tp57577_TGAC_v2_gene25442	mRNA	1053	1
Tp57577_TGAC_v2_mRNA17136	Tp57577_TGAC_v2_gene16561	mRNA	654	1
Tp57577_TGAC_v2_gene6925_novel02	Tp57577_TGAC_v2_gene6925	mRNA	405	1
Tp57577_TGAC_v2_gene37044_novel01	Tp57577_TGAC_v2_gene37044	mRNA	340	1
Tp57577_TGAC_v2_gene12373_novel02	Tp57577_TGAC_v2_gene12373	mRNA	443	1
Tp57577_TGAC_v2_gene39886_novel02	Tp57577_TGAC_v2_gene39886	mRNA	609	1
Tp57577_TGAC_v2_gene38875_novel01	Tp57577_TGAC_v2_gene38875	mRNA	653	1
Tp57577_TGAC_v2_mRNA31015	Tp57577_TGAC_v2_gene29991	mRNA	648	1
Tp57577_TGAC_v2_mRNA37820	Tp57577_TGAC_v2_gene36596	mRNA	894	1
Tp57577_TGAC_v2_gene31517_novel02	Tp57577_TGAC_v2_gene31517	mRNA	2299	1
Tp57577_TGAC_v2_gene16578_novel01	Tp57577_TGAC_v2_gene16578	mRNA	429	1
Tp57577_TGAC_v2_mRNA39991	Tp57577_TGAC_v2_gene38685	mRNA	460	1
Tp57577_TGAC_v2_gene32270_novel02	Tp57577_TGAC_v2_gene32270	mRNA	1087	1
Tp57577_TGAC_v2_gene8293_novel01	Tp57577_TGAC_v2_gene8293	mRNA	691	1
Tp57577_TGAC_v2_gene24971_novel01	Tp57577_TGAC_v2_gene24971	mRNA	1226	1
Tp57577_TGAC_v2_mRNA37533	Tp57577_TGAC_v2_gene36312	mRNA	450	1
Tp57577_TGAC_v2_gene1562_novel03	Tp57577_TGAC_v2_gene1562	mRNA	514	1
Tp57577_TGAC_v2_gene1601_novel02	Tp57577_TGAC_v2_gene1601	mRNA	1723	1
Tp57577_TGAC_v2_gene11215_novel06	Tp57577_TGAC_v2_gene11215	mRNA	1760	1
Tp57577_TGAC_v2_gene25701_novel04	Tp57577_TGAC_v2_gene25701	mRNA	833	1
Tp57577_TGAC_v2_gene21850_novel02	Tp57577_TGAC_v2_gene21850	mRNA	1049	1
Tp57577_TGAC_v2_gene34052_novel02	Tp57577_TGAC_v2_gene34052	mRNA	696	1
Tp57577_TGAC_v2_gene2634_novel01	Tp57577_TGAC_v2_gene2634	mRNA	476	1
Tp57577_TGAC_v2_gene12511_novel03	Tp57577_TGAC_v2_gene12511	mRNA	1349	1
Tp57577_TGAC_v2_gene23147_novel02	Tp57577_TGAC_v2_gene23147	mRNA	1861	1
Tp57577_TGAC_v2_gene35767_novel01	Tp57577_TGAC_v2_gene35767	mRNA	1091	1
Tp57577_TGAC_v2_mRNA33749	Tp57577_TGAC_v2_gene32649	mRNA	1502	1
Novelgene1443_novel01	Novelgene1443	mRNA	4190	1
Tp57577_TGAC_v2_gene30082_novel01	Tp57577_TGAC_v2_gene30082	mRNA	1154	1
Tp57577_TGAC_v2_mRNA35160	Tp57577_TGAC_v2_gene34013	mRNA	802	1
Novelgene1115_novel01	Novelgene1115	mRNA	531	1
Tp57577_TGAC_v2_gene13314_novel02	Tp57577_TGAC_v2_gene13314	mRNA	1063	1
Tp57577_TGAC_v2_gene38105_novel02	Tp57577_TGAC_v2_gene38105	mRNA	465	1
Tp57577_TGAC_v2_mRNA18698	Tp57577_TGAC_v2_gene18070	mRNA	572	1
Novelgene1529_novel01	Novelgene1529	mRNA	2397	1
Tp57577_TGAC_v2_gene28983_novel01	Tp57577_TGAC_v2_gene28983	mRNA	567	1
Tp57577_TGAC_v2_gene33699_novel02	Tp57577_TGAC_v2_gene33699	mRNA	643	1
Tp57577_TGAC_v2_gene8723_novel02	Tp57577_TGAC_v2_gene8723	mRNA	1034	1
Tp57577_TGAC_v2_mRNA15661	Tp57577_TGAC_v2_gene15155	mRNA	3082	1
Novelgene1531_novel01	Novelgene1531	mRNA	725	1
Tp57577_TGAC_v2_gene15679_novel02	Tp57577_TGAC_v2_gene15679	mRNA	1701	1
Tp57577_TGAC_v2_gene27368_novel04	Tp57577_TGAC_v2_gene27368	mRNA	991	1
Tp57577_TGAC_v2_gene9536_novel03	Tp57577_TGAC_v2_gene9536	mRNA	496	1
Tp57577_TGAC_v2_mRNA14681	Tp57577_TGAC_v2_gene14204	mRNA	1981	1
Tp57577_TGAC_v2_gene29541_novel01	Tp57577_TGAC_v2_gene29541	mRNA	2599	1
Tp57577_TGAC_v2_gene8829_novel01	Tp57577_TGAC_v2_gene8829	mRNA	806	1
Tp57577_TGAC_v2_gene31815_novel02	Tp57577_TGAC_v2_gene31815	mRNA	5472	1
Tp57577_TGAC_v2_gene35420_novel03	Tp57577_TGAC_v2_gene35420	mRNA	1338	1
Tp57577_TGAC_v2_gene9537_novel04	Tp57577_TGAC_v2_gene9537	mRNA	533	1
Tp57577_TGAC_v2_mRNA22513	Tp57577_TGAC_v2_gene21766	mRNA	629	1
Novelgene1353_novel01	Novelgene1353	mRNA	2984	1
Tp57577_TGAC_v2_gene32558_novel02	Tp57577_TGAC_v2_gene32558	mRNA	1834	1
Tp57577_TGAC_v2_mRNA37848	Tp57577_TGAC_v2_gene36624	mRNA	889	1
Tp57577_TGAC_v2_mRNA19825	Tp57577_TGAC_v2_gene19163	mRNA	1464	1
Tp57577_TGAC_v2_gene1905_novel02	Tp57577_TGAC_v2_gene1905	mRNA	1104	1
Tp57577_TGAC_v2_gene16115_novel01	Tp57577_TGAC_v2_gene16115	mRNA	2895	1
Tp57577_TGAC_v2_gene33515_novel01	Tp57577_TGAC_v2_gene33515	mRNA	933	1
Tp57577_TGAC_v2_gene6466_novel03	Tp57577_TGAC_v2_gene6466	mRNA	531	1
Tp57577_TGAC_v2_gene15665_novel01	Tp57577_TGAC_v2_gene15665	mRNA	496	1
Tp57577_TGAC_v2_gene37749_novel01	Tp57577_TGAC_v2_gene37749	mRNA	617	1
Novelgene1089_novel01	Novelgene1089	mRNA	951	1
Tp57577_TGAC_v2_gene32748_novel01	Tp57577_TGAC_v2_gene32748	mRNA	390	1
Tp57577_TGAC_v2_gene32364_novel01	Tp57577_TGAC_v2_gene32364	mRNA	335	1
Tp57577_TGAC_v2_gene34067_novel01	Tp57577_TGAC_v2_gene34067	mRNA	2426	1
Tp57577_TGAC_v2_gene3570_novel01	Tp57577_TGAC_v2_gene3570	mRNA	357	1
Tp57577_TGAC_v2_gene8622_novel03	Tp57577_TGAC_v2_gene8622	mRNA	1905	1
Tp57577_TGAC_v2_gene26592_novel02	Tp57577_TGAC_v2_gene26592	mRNA	2168	1
Novelgene0369_novel01	Novelgene0369	mRNA	549	1
Tp57577_TGAC_v2_gene26364_novel04	Tp57577_TGAC_v2_gene26364	mRNA	1313	1
Novelgene0467_novel01	Novelgene0467	mRNA	563	1
Tp57577_TGAC_v2_mRNA24042	Tp57577_TGAC_v2_gene23247	mRNA	738	1
Tp57577_TGAC_v2_gene12519_novel02	Tp57577_TGAC_v2_gene12519	mRNA	477	1
Tp57577_TGAC_v2_gene12994_novel01	Tp57577_TGAC_v2_gene12994	mRNA	451	1
Tp57577_TGAC_v2_gene8038_novel06	Tp57577_TGAC_v2_gene8038	mRNA	1454	1
Novelgene1170_novel01	Novelgene1170	mRNA	1182	1
Tp57577_TGAC_v2_gene4497_novel01	Tp57577_TGAC_v2_gene4497	mRNA	516	1
Tp57577_TGAC_v2_gene36372_novel01	Tp57577_TGAC_v2_gene36372	mRNA	5185	1
Tp57577_TGAC_v2_gene25396_novel02	Tp57577_TGAC_v2_gene25396	mRNA	609	1
Novelgene0338_novel01	Novelgene0338	mRNA	925	1
Tp57577_TGAC_v2_gene26452_novel01	Tp57577_TGAC_v2_gene26452	mRNA	1856	1
Tp57577_TGAC_v2_mRNA39524	Tp57577_TGAC_v2_gene38230	mRNA	1549	1
Tp57577_TGAC_v2_gene9557_novel02	Tp57577_TGAC_v2_gene9557	mRNA	402	1
Tp57577_TGAC_v2_gene13118_novel01	Tp57577_TGAC_v2_gene13118	mRNA	426	1
Tp57577_TGAC_v2_gene12330_novel01	Tp57577_TGAC_v2_gene12330	mRNA	548	1
Tp57577_TGAC_v2_gene39023_novel02	Tp57577_TGAC_v2_gene39023	mRNA	1152	1
Tp57577_TGAC_v2_gene33647_novel01	Tp57577_TGAC_v2_gene33647	mRNA	869	1
Tp57577_TGAC_v2_gene14514_novel01	Tp57577_TGAC_v2_gene14514	mRNA	853	1
Tp57577_TGAC_v2_gene35209_novel11	Tp57577_TGAC_v2_gene35209	mRNA	411	1
Tp57577_TGAC_v2_mRNA22718	Tp57577_TGAC_v2_gene21965	mRNA	665	1
Tp57577_TGAC_v2_gene40185_novel01	Tp57577_TGAC_v2_gene40185	mRNA	471	1
Tp57577_TGAC_v2_gene38832_novel01	Tp57577_TGAC_v2_gene38832	mRNA	725	1
Tp57577_TGAC_v2_gene34814_novel02	Tp57577_TGAC_v2_gene34814	mRNA	857	1
Tp57577_TGAC_v2_gene35883_novel02	Tp57577_TGAC_v2_gene35883	mRNA	1774	1
Tp57577_TGAC_v2_gene25213_novel01	Tp57577_TGAC_v2_gene25213	mRNA	794	1
Tp57577_TGAC_v2_gene517_novel02	Tp57577_TGAC_v2_gene517	mRNA	1071	1
Novelgene1045_novel01	Novelgene1045	mRNA	948	1
Tp57577_TGAC_v2_gene21277_novel01	Tp57577_TGAC_v2_gene21277	mRNA	478	1
Tp57577_TGAC_v2_mRNA41499	Tp57577_TGAC_v2_gene40149	mRNA	691	1
Tp57577_TGAC_v2_gene18585_novel02	Tp57577_TGAC_v2_gene18585	mRNA	424	1
Tp57577_TGAC_v2_gene9590_novel02	Tp57577_TGAC_v2_gene9590	mRNA	2832	1
Tp57577_TGAC_v2_mRNA6767	Tp57577_TGAC_v2_gene6537	mRNA	1221	1
Tp57577_TGAC_v2_gene26736_novel01	Tp57577_TGAC_v2_gene26736	mRNA	1042	1
Tp57577_TGAC_v2_mRNA30003	Tp57577_TGAC_v2_gene29019	mRNA	768	1
Tp57577_TGAC_v2_gene27720_novel01	Tp57577_TGAC_v2_gene27720	mRNA	392	1
Tp57577_TGAC_v2_gene39001_novel02	Tp57577_TGAC_v2_gene39001	mRNA	678	1
Tp57577_TGAC_v2_mRNA36437	Tp57577_TGAC_v2_gene35240	mRNA	958	1
Tp57577_TGAC_v2_gene16440_novel01	Tp57577_TGAC_v2_gene16440	mRNA	1144	1
Novelgene0154_novel01	Novelgene0154	mRNA	671	1
Tp57577_TGAC_v2_gene35864_novel03	Tp57577_TGAC_v2_gene35864	mRNA	503	1
Tp57577_TGAC_v2_gene2662_novel01	Tp57577_TGAC_v2_gene2662	mRNA	608	1
Tp57577_TGAC_v2_mRNA18676	Tp57577_TGAC_v2_gene18049	mRNA	510	1
Tp57577_TGAC_v2_gene28105_novel02	Tp57577_TGAC_v2_gene28105	mRNA	915	1
Tp57577_TGAC_v2_gene22938_novel05	Tp57577_TGAC_v2_gene22938	mRNA	505	1
Tp57577_TGAC_v2_gene32950_novel03	Tp57577_TGAC_v2_gene32950	mRNA	639	1
Tp57577_TGAC_v2_gene24274_novel01	Tp57577_TGAC_v2_gene24274	mRNA	353	1
Tp57577_TGAC_v2_gene38543_novel01	Tp57577_TGAC_v2_gene38543	mRNA	508	1
Tp57577_TGAC_v2_gene12560_novel02	Tp57577_TGAC_v2_gene12560	mRNA	340	1
Tp57577_TGAC_v2_gene11960_novel02	Tp57577_TGAC_v2_gene11960	mRNA	496	1
Tp57577_TGAC_v2_gene4294_novel01	Tp57577_TGAC_v2_gene4294	mRNA	795	1
Novelgene0393_novel01	Novelgene0393	mRNA	955	1
Tp57577_TGAC_v2_gene3826_novel01	Tp57577_TGAC_v2_gene3826	mRNA	1847	1
Tp57577_TGAC_v2_gene33640_novel02	Tp57577_TGAC_v2_gene33640	mRNA	337	1
Tp57577_TGAC_v2_gene9537_novel01	Tp57577_TGAC_v2_gene9537	mRNA	3071	1
Tp57577_TGAC_v2_gene3033_novel03	Tp57577_TGAC_v2_gene3033	mRNA	1023	1
Novelgene1554_novel01	Novelgene1554	mRNA	219	1
Tp57577_TGAC_v2_gene14344_novel01	Tp57577_TGAC_v2_gene14344	mRNA	351	1
Tp57577_TGAC_v2_gene34304_novel01	Tp57577_TGAC_v2_gene34304	mRNA	364	1
Tp57577_TGAC_v2_mRNA36090	Tp57577_TGAC_v2_gene34898	mRNA	1180	1
Tp57577_TGAC_v2_gene31389_novel02	Tp57577_TGAC_v2_gene31389	mRNA	864	1
Tp57577_TGAC_v2_mRNA34785	Tp57577_TGAC_v2_gene33648	mRNA	1546	1
Tp57577_TGAC_v2_gene2711_novel01	Tp57577_TGAC_v2_gene2711	mRNA	321	1
Tp57577_TGAC_v2_mRNA17870	Tp57577_TGAC_v2_gene17269	mRNA	1048	1
Tp57577_TGAC_v2_gene22354_novel01	Tp57577_TGAC_v2_gene22354	mRNA	1968	1
Tp57577_TGAC_v2_gene8903_novel02	Tp57577_TGAC_v2_gene8903	mRNA	895	1
Tp57577_TGAC_v2_gene23100_novel01	Tp57577_TGAC_v2_gene23100	mRNA	901	1
Tp57577_TGAC_v2_gene27849_novel02	Tp57577_TGAC_v2_gene27849	mRNA	457	1
Tp57577_TGAC_v2_gene38342_novel01	Tp57577_TGAC_v2_gene38342	mRNA	423	1
Tp57577_TGAC_v2_gene16546_novel03	Tp57577_TGAC_v2_gene16546	mRNA	321	1
Tp57577_TGAC_v2_gene7701_novel02	Tp57577_TGAC_v2_gene7701	mRNA	388	1
Tp57577_TGAC_v2_gene34569_novel01	Tp57577_TGAC_v2_gene34569	mRNA	1076	1
Tp57577_TGAC_v2_gene2708_novel01	Tp57577_TGAC_v2_gene2708	mRNA	1281	1
Tp57577_TGAC_v2_gene10733_novel01	Tp57577_TGAC_v2_gene10733	mRNA	649	1
Tp57577_TGAC_v2_gene28692_novel01	Tp57577_TGAC_v2_gene28692	mRNA	555	1
Tp57577_TGAC_v2_gene1076_novel01	Tp57577_TGAC_v2_gene1076	mRNA	2028	1
Tp57577_TGAC_v2_mRNA20924	Tp57577_TGAC_v2_gene20224	mRNA	706	1
Tp57577_TGAC_v2_mRNA35258	Tp57577_TGAC_v2_gene34111	mRNA	1192	1
Tp57577_TGAC_v2_gene29248_novel01	Tp57577_TGAC_v2_gene29248	mRNA	1052	1
Tp57577_TGAC_v2_gene9372_novel03	Tp57577_TGAC_v2_gene9372	mRNA	1455	1
Tp57577_TGAC_v2_gene30062_novel01	Tp57577_TGAC_v2_gene30062	mRNA	832	1
Tp57577_TGAC_v2_gene20055_novel06	Tp57577_TGAC_v2_gene20055	mRNA	1737	1
Tp57577_TGAC_v2_gene17752_novel02	Tp57577_TGAC_v2_gene17752	mRNA	1058	1
Tp57577_TGAC_v2_mRNA16012	Tp57577_TGAC_v2_gene15493	mRNA	1270	1
Tp57577_TGAC_v2_gene30455_novel01	Tp57577_TGAC_v2_gene30455	mRNA	2170	1
Tp57577_TGAC_v2_gene505_novel01	Tp57577_TGAC_v2_gene505	mRNA	959	1
Tp57577_TGAC_v2_gene21649_novel03	Tp57577_TGAC_v2_gene21649	mRNA	604	1
Tp57577_TGAC_v2_mRNA35693	Tp57577_TGAC_v2_gene34520	mRNA	1787	1
Tp57577_TGAC_v2_mRNA14151	Tp57577_TGAC_v2_gene13695	mRNA	1294	1
Tp57577_TGAC_v2_gene11242_novel01	Tp57577_TGAC_v2_gene11242	mRNA	919	1
Novelgene0416_novel01	Novelgene0416	mRNA	874	1
Tp57577_TGAC_v2_gene1416_novel02	Tp57577_TGAC_v2_gene1416	mRNA	733	1
Tp57577_TGAC_v2_gene16477_novel01	Tp57577_TGAC_v2_gene16477	mRNA	1210	1
Tp57577_TGAC_v2_gene31830_novel01	Tp57577_TGAC_v2_gene31830	mRNA	702	1
Tp57577_TGAC_v2_gene9821_novel03	Tp57577_TGAC_v2_gene9821	mRNA	445	1
Novelgene1188_novel01	Novelgene1188	mRNA	1423	1
Tp57577_TGAC_v2_gene20139_novel02	Tp57577_TGAC_v2_gene20139	mRNA	723	1
Tp57577_TGAC_v2_gene7773_novel01	Tp57577_TGAC_v2_gene7773	mRNA	1357	1
Novelgene1449_novel01	Novelgene1449	mRNA	440	1
Tp57577_TGAC_v2_gene19163_novel02	Tp57577_TGAC_v2_gene19163	mRNA	362	1
Tp57577_TGAC_v2_mRNA11378	Tp57577_TGAC_v2_gene11020	mRNA	1273	1
Tp57577_TGAC_v2_gene2613_novel04	Tp57577_TGAC_v2_gene2613	mRNA	561	1
Tp57577_TGAC_v2_gene22571_novel01	Tp57577_TGAC_v2_gene22571	mRNA	853	1
Tp57577_TGAC_v2_gene3281_novel04	Tp57577_TGAC_v2_gene3281	mRNA	997	1
Tp57577_TGAC_v2_gene21030_novel01	Tp57577_TGAC_v2_gene21030	mRNA	1092	1
Tp57577_TGAC_v2_gene9858_novel03	Tp57577_TGAC_v2_gene9858	mRNA	1163	1
Novelgene1787_novel01	Novelgene1787	mRNA	771	1
Tp57577_TGAC_v2_gene2417_novel01	Tp57577_TGAC_v2_gene2417	mRNA	898	1
Tp57577_TGAC_v2_gene9830_novel02	Tp57577_TGAC_v2_gene9830	mRNA	499	1
Tp57577_TGAC_v2_gene15749_novel01	Tp57577_TGAC_v2_gene15749	mRNA	1213	1
Tp57577_TGAC_v2_mRNA15998	Tp57577_TGAC_v2_gene15479	mRNA	645	1
Tp57577_TGAC_v2_gene35684_novel01	Tp57577_TGAC_v2_gene35684	mRNA	453	1
Tp57577_TGAC_v2_gene14519_novel02	Tp57577_TGAC_v2_gene14519	mRNA	2881	1
Tp57577_TGAC_v2_gene18887_novel02	Tp57577_TGAC_v2_gene18887	mRNA	3363	1
Tp57577_TGAC_v2_gene31054_novel01	Tp57577_TGAC_v2_gene31054	mRNA	570	1
Tp57577_TGAC_v2_gene37380_novel03	Tp57577_TGAC_v2_gene37380	mRNA	710	1
Tp57577_TGAC_v2_gene7762_novel01	Tp57577_TGAC_v2_gene7762	mRNA	399	1
Tp57577_TGAC_v2_gene29862_novel02	Tp57577_TGAC_v2_gene29862	mRNA	412	1
Tp57577_TGAC_v2_gene31814_novel02	Tp57577_TGAC_v2_gene31814	mRNA	1978	1
Tp57577_TGAC_v2_mRNA8885	Tp57577_TGAC_v2_gene8597	mRNA	1211	1
Tp57577_TGAC_v2_gene36713_novel01	Tp57577_TGAC_v2_gene36713	mRNA	1541	1
Tp57577_TGAC_v2_gene30542_novel02	Tp57577_TGAC_v2_gene30542	mRNA	1351	1
Tp57577_TGAC_v2_gene17026_novel01	Tp57577_TGAC_v2_gene17026	mRNA	709	1
Tp57577_TGAC_v2_gene2143_novel12	Tp57577_TGAC_v2_gene2143	mRNA	526	1
Tp57577_TGAC_v2_gene16407_novel01	Tp57577_TGAC_v2_gene16407	mRNA	649	1
Tp57577_TGAC_v2_gene22313_novel01	Tp57577_TGAC_v2_gene22313	mRNA	1323	1
Tp57577_TGAC_v2_mRNA25196	Tp57577_TGAC_v2_gene24358	mRNA	1320	1
Tp57577_TGAC_v2_mRNA27728	Tp57577_TGAC_v2_gene26811	mRNA	939	1
Tp57577_TGAC_v2_gene1182_novel03	Tp57577_TGAC_v2_gene1182	mRNA	391	1
Tp57577_TGAC_v2_gene27784_novel02	Tp57577_TGAC_v2_gene27784	mRNA	476	1
Tp57577_TGAC_v2_gene29859_novel01	Tp57577_TGAC_v2_gene29859	mRNA	2247	1
Novelgene1722_novel01	Novelgene1722	mRNA	3647	1
Tp57577_TGAC_v2_mRNA17249	Tp57577_TGAC_v2_gene16668	mRNA	657	1
Tp57577_TGAC_v2_gene11687_novel01	Tp57577_TGAC_v2_gene11687	mRNA	753	1
Tp57577_TGAC_v2_mRNA38721	Tp57577_TGAC_v2_gene37464	mRNA	3333	1
Tp57577_TGAC_v2_gene15069_novel01	Tp57577_TGAC_v2_gene15069	mRNA	1233	1
Tp57577_TGAC_v2_gene37997_novel02	Tp57577_TGAC_v2_gene37997	mRNA	875	1
Tp57577_TGAC_v2_gene32560_novel03	Tp57577_TGAC_v2_gene32560	mRNA	378	1
Tp57577_TGAC_v2_gene4884_novel01	Tp57577_TGAC_v2_gene4884	mRNA	2275	1
Tp57577_TGAC_v2_gene13696_novel10	Tp57577_TGAC_v2_gene13696	mRNA	820	1
Tp57577_TGAC_v2_mRNA17149	Tp57577_TGAC_v2_gene16574	mRNA	1148	1
Tp57577_TGAC_v2_gene30337_novel02	Tp57577_TGAC_v2_gene30337	mRNA	1308	1
Tp57577_TGAC_v2_gene32676_novel02	Tp57577_TGAC_v2_gene32676	mRNA	639	1
Tp57577_TGAC_v2_mRNA2706	Tp57577_TGAC_v2_gene2634	mRNA	827	1
Tp57577_TGAC_v2_mRNA10576	Tp57577_TGAC_v2_gene10234	mRNA	440	1
Tp57577_TGAC_v2_gene4821_novel02	Tp57577_TGAC_v2_gene4821	mRNA	1128	1
Tp57577_TGAC_v2_mRNA25391	Tp57577_TGAC_v2_gene24543	mRNA	2491	1
Tp57577_TGAC_v2_gene10728_novel02	Tp57577_TGAC_v2_gene10728	mRNA	882	1
Tp57577_TGAC_v2_gene12153_novel02	Tp57577_TGAC_v2_gene12153	mRNA	498	1
Tp57577_TGAC_v2_gene5665_novel02	Tp57577_TGAC_v2_gene5665	mRNA	1094	1
Tp57577_TGAC_v2_mRNA19519	Tp57577_TGAC_v2_gene18863	mRNA	1041	1
Tp57577_TGAC_v2_mRNA13361	Tp57577_TGAC_v2_gene12932	mRNA	741	1
Tp57577_TGAC_v2_gene32993_novel01	Tp57577_TGAC_v2_gene32993	mRNA	1540	1
Tp57577_TGAC_v2_gene25479_novel01	Tp57577_TGAC_v2_gene25479	mRNA	1041	1
Tp57577_TGAC_v2_gene11918_novel01	Tp57577_TGAC_v2_gene11918	mRNA	922	1
Tp57577_TGAC_v2_gene5055_novel01	Tp57577_TGAC_v2_gene5055	mRNA	486	1
Tp57577_TGAC_v2_gene12750_novel01	Tp57577_TGAC_v2_gene12750	mRNA	1387	1
Tp57577_TGAC_v2_gene25833_novel02	Tp57577_TGAC_v2_gene25833	mRNA	1399	1
Tp57577_TGAC_v2_gene9151_novel01	Tp57577_TGAC_v2_gene9151	mRNA	255	1
Tp57577_TGAC_v2_mRNA5463	Tp57577_TGAC_v2_gene5283	mRNA	499	1
Tp57577_TGAC_v2_mRNA40467	Tp57577_TGAC_v2_gene39136	mRNA	1893	1
Tp57577_TGAC_v2_gene8423_novel02	Tp57577_TGAC_v2_gene8423	mRNA	1452	1
Tp57577_TGAC_v2_gene39478_novel06	Tp57577_TGAC_v2_gene39478	mRNA	681	1
Tp57577_TGAC_v2_mRNA26344	Tp57577_TGAC_v2_gene25477	mRNA	1293	1
Tp57577_TGAC_v2_gene24070_novel01	Tp57577_TGAC_v2_gene24070	mRNA	352	1
Tp57577_TGAC_v2_gene37307_novel02	Tp57577_TGAC_v2_gene37307	mRNA	438	1
Tp57577_TGAC_v2_gene6229_novel01	Tp57577_TGAC_v2_gene6229	mRNA	371	1
Tp57577_TGAC_v2_mRNA23426	Tp57577_TGAC_v2_gene22651	mRNA	1355	1
Tp57577_TGAC_v2_gene37860_novel01	Tp57577_TGAC_v2_gene37860	mRNA	794	1
Tp57577_TGAC_v2_mRNA28370	Tp57577_TGAC_v2_gene27429	mRNA	890	1
Tp57577_TGAC_v2_gene3412_novel01	Tp57577_TGAC_v2_gene3412	mRNA	2442	1
Tp57577_TGAC_v2_gene8456_novel01	Tp57577_TGAC_v2_gene8456	mRNA	568	1
Tp57577_TGAC_v2_mRNA33741	Tp57577_TGAC_v2_gene32641	mRNA	1867	1
Tp57577_TGAC_v2_gene6782_novel01	Tp57577_TGAC_v2_gene6782	mRNA	3712	1
Tp57577_TGAC_v2_mRNA32652	Tp57577_TGAC_v2_gene31591	mRNA	1664	1
Tp57577_TGAC_v2_gene11467_novel01	Tp57577_TGAC_v2_gene11467	mRNA	631	1
Tp57577_TGAC_v2_mRNA14618	Tp57577_TGAC_v2_gene14144	mRNA	693	1
Tp57577_TGAC_v2_gene10659_novel02	Tp57577_TGAC_v2_gene10659	mRNA	707	1
Tp57577_TGAC_v2_gene10258_novel01	Tp57577_TGAC_v2_gene10258	mRNA	492	1
Novelgene0094_novel01	Novelgene0094	mRNA	1129	1
Tp57577_TGAC_v2_gene30725_novel01	Tp57577_TGAC_v2_gene30725	mRNA	311	1
Tp57577_TGAC_v2_gene14312_novel01	Tp57577_TGAC_v2_gene14312	mRNA	2030	1
Tp57577_TGAC_v2_mRNA26121	Tp57577_TGAC_v2_gene25261	mRNA	1406	1
Tp57577_TGAC_v2_mRNA28424	Tp57577_TGAC_v2_gene27483	mRNA	709	1
Tp57577_TGAC_v2_gene33236_novel01	Tp57577_TGAC_v2_gene33236	mRNA	791	1
Tp57577_TGAC_v2_gene2744_novel01	Tp57577_TGAC_v2_gene2744	mRNA	1358	1
Tp57577_TGAC_v2_gene30003_novel02	Tp57577_TGAC_v2_gene30003	mRNA	1102	1
Tp57577_TGAC_v2_mRNA28482	Tp57577_TGAC_v2_gene27541	mRNA	2083	1
Tp57577_TGAC_v2_gene4127_novel01	Tp57577_TGAC_v2_gene4127	mRNA	3620	1
Tp57577_TGAC_v2_gene12932_novel01	Tp57577_TGAC_v2_gene12932	mRNA	317	1
Tp57577_TGAC_v2_gene23014_novel02	Tp57577_TGAC_v2_gene23014	mRNA	1819	1
Tp57577_TGAC_v2_gene16387_novel01	Tp57577_TGAC_v2_gene16387	mRNA	872	1
Tp57577_TGAC_v2_gene17788_novel01	Tp57577_TGAC_v2_gene17788	mRNA	538	1
Tp57577_TGAC_v2_gene6640_novel01	Tp57577_TGAC_v2_gene6640	mRNA	1961	1
Tp57577_TGAC_v2_gene19170_novel05	Tp57577_TGAC_v2_gene19170	mRNA	1315	1
Tp57577_TGAC_v2_gene30892_novel01	Tp57577_TGAC_v2_gene30892	mRNA	986	1
Tp57577_TGAC_v2_mRNA7920	Tp57577_TGAC_v2_gene7656	mRNA	923	1
Tp57577_TGAC_v2_gene6603_novel01	Tp57577_TGAC_v2_gene6603	mRNA	405	1
Tp57577_TGAC_v2_gene26450_novel05	Tp57577_TGAC_v2_gene26450	mRNA	651	1
Tp57577_TGAC_v2_gene5665_novel01	Tp57577_TGAC_v2_gene5665	mRNA	656	1
Tp57577_TGAC_v2_mRNA40190	Tp57577_TGAC_v2_gene38873	mRNA	575	1
Tp57577_TGAC_v2_gene30109_novel01	Tp57577_TGAC_v2_gene30109	mRNA	1396	1
Tp57577_TGAC_v2_mRNA30778	Tp57577_TGAC_v2_gene29761	mRNA	2422	1
Tp57577_TGAC_v2_gene14241_novel01	Tp57577_TGAC_v2_gene14241	mRNA	375	1
Tp57577_TGAC_v2_gene17331_novel01	Tp57577_TGAC_v2_gene17331	mRNA	651	1
Tp57577_TGAC_v2_gene15722_novel04	Tp57577_TGAC_v2_gene15722	mRNA	836	1
Tp57577_TGAC_v2_mRNA13719	Tp57577_TGAC_v2_gene13272	mRNA	536	1
Tp57577_TGAC_v2_gene18864_novel02	Tp57577_TGAC_v2_gene18864	mRNA	953	1
Tp57577_TGAC_v2_gene13606_novel01	Tp57577_TGAC_v2_gene13606	mRNA	1384	1
Tp57577_TGAC_v2_mRNA31588	Tp57577_TGAC_v2_gene30553	mRNA	2170	1
Novelgene1172_novel01	Novelgene1172	mRNA	766	1
Tp57577_TGAC_v2_mRNA10033	Tp57577_TGAC_v2_gene9704	mRNA	526	1
Tp57577_TGAC_v2_gene35794_novel01	Tp57577_TGAC_v2_gene35794	mRNA	2645	1
Novelgene1756_novel01	Novelgene1756	mRNA	1290	1
Tp57577_TGAC_v2_gene34543_novel01	Tp57577_TGAC_v2_gene34543	mRNA	406	1
Tp57577_TGAC_v2_mRNA16465	Tp57577_TGAC_v2_gene15923	mRNA	618	1
Tp57577_TGAC_v2_gene38999_novel01	Tp57577_TGAC_v2_gene38999	mRNA	1052	1
Tp57577_TGAC_v2_gene2133_novel01	Tp57577_TGAC_v2_gene2133	mRNA	453	1
Tp57577_TGAC_v2_mRNA22048	Tp57577_TGAC_v2_gene21318	mRNA	685	1
Tp57577_TGAC_v2_gene32409_novel01	Tp57577_TGAC_v2_gene32409	mRNA	999	1
Tp57577_TGAC_v2_gene36651_novel01	Tp57577_TGAC_v2_gene36651	mRNA	2469	1
Tp57577_TGAC_v2_gene16610_novel01	Tp57577_TGAC_v2_gene16610	mRNA	410	1
Tp57577_TGAC_v2_gene24965_novel03	Tp57577_TGAC_v2_gene24965	mRNA	343	1
Tp57577_TGAC_v2_gene5444_novel01	Tp57577_TGAC_v2_gene5444	mRNA	430	1
Tp57577_TGAC_v2_gene28454_novel01	Tp57577_TGAC_v2_gene28454	mRNA	3322	1
Tp57577_TGAC_v2_mRNA20610	Tp57577_TGAC_v2_gene19920	mRNA	828	1
Tp57577_TGAC_v2_gene26391_novel05	Tp57577_TGAC_v2_gene26391	mRNA	689	1
Tp57577_TGAC_v2_mRNA21036	Tp57577_TGAC_v2_gene20331	mRNA	967	1
Tp57577_TGAC_v2_gene22651_novel02	Tp57577_TGAC_v2_gene22651	mRNA	775	1
Tp57577_TGAC_v2_mRNA20957	Tp57577_TGAC_v2_gene20257	mRNA	1065	1
Tp57577_TGAC_v2_gene16479_novel05	Tp57577_TGAC_v2_gene16479	mRNA	470	1
Tp57577_TGAC_v2_gene9042_novel06	Tp57577_TGAC_v2_gene9042	mRNA	2771	1
Tp57577_TGAC_v2_gene2123_novel03	Tp57577_TGAC_v2_gene2123	mRNA	2573	1
Novelgene0508_novel01	Novelgene0508	mRNA	422	1
Tp57577_TGAC_v2_gene26364_novel05	Tp57577_TGAC_v2_gene26364	mRNA	561	1
Tp57577_TGAC_v2_gene11488_novel01	Tp57577_TGAC_v2_gene11488	mRNA	1923	1
Tp57577_TGAC_v2_mRNA8887	Tp57577_TGAC_v2_gene8599	mRNA	1446	1
Tp57577_TGAC_v2_mRNA30708	Tp57577_TGAC_v2_gene29692	mRNA	2866	1
Tp57577_TGAC_v2_gene9763_novel13	Tp57577_TGAC_v2_gene9763	mRNA	3093	1
Tp57577_TGAC_v2_gene31672_novel01	Tp57577_TGAC_v2_gene31672	mRNA	301	1
Tp57577_TGAC_v2_gene8697_novel01	Tp57577_TGAC_v2_gene8697	mRNA	2814	1
Tp57577_TGAC_v2_gene4240_novel01	Tp57577_TGAC_v2_gene4240	mRNA	707	1
Tp57577_TGAC_v2_gene33605_novel13	Tp57577_TGAC_v2_gene33605	mRNA	900	1
Tp57577_TGAC_v2_gene31970_novel01	Tp57577_TGAC_v2_gene31970	mRNA	1810	1
Tp57577_TGAC_v2_mRNA13468	Tp57577_TGAC_v2_gene13037	mRNA	1052	1
Tp57577_TGAC_v2_gene28171_novel03	Tp57577_TGAC_v2_gene28171	mRNA	428	1
Tp57577_TGAC_v2_gene17429_novel01	Tp57577_TGAC_v2_gene17429	mRNA	952	1
Tp57577_TGAC_v2_mRNA23148	Tp57577_TGAC_v2_gene22379	mRNA	359	1
Tp57577_TGAC_v2_gene9495_novel04	Tp57577_TGAC_v2_gene9495	mRNA	393	1
Tp57577_TGAC_v2_mRNA11274	Tp57577_TGAC_v2_gene10916	mRNA	1328	1
Tp57577_TGAC_v2_gene13500_novel01	Tp57577_TGAC_v2_gene13500	mRNA	594	1
Tp57577_TGAC_v2_gene26140_novel32	Tp57577_TGAC_v2_gene26140	mRNA	499	1
Tp57577_TGAC_v2_gene15236_novel01	Tp57577_TGAC_v2_gene15236	mRNA	455	1
Tp57577_TGAC_v2_gene22395_novel01	Tp57577_TGAC_v2_gene22395	mRNA	949	1
Novelgene1234_novel01	Novelgene1234	mRNA	2889	1
Novelgene1314_novel01	Novelgene1314	mRNA	636	1
Tp57577_TGAC_v2_gene1302_novel02	Tp57577_TGAC_v2_gene1302	mRNA	715	1
Tp57577_TGAC_v2_gene23579_novel01	Tp57577_TGAC_v2_gene23579	mRNA	3243	1
Tp57577_TGAC_v2_gene2340_novel02	Tp57577_TGAC_v2_gene2340	mRNA	594	1
Tp57577_TGAC_v2_gene19309_novel01	Tp57577_TGAC_v2_gene19309	mRNA	650	1
Tp57577_TGAC_v2_gene24895_novel01	Tp57577_TGAC_v2_gene24895	mRNA	667	1
Tp57577_TGAC_v2_mRNA10273	Tp57577_TGAC_v2_gene9936	mRNA	1603	1
Tp57577_TGAC_v2_gene18237_novel01	Tp57577_TGAC_v2_gene18237	mRNA	2660	1
Tp57577_TGAC_v2_gene31101_novel02	Tp57577_TGAC_v2_gene31101	mRNA	2166	1
Tp57577_TGAC_v2_gene11811_novel02	Tp57577_TGAC_v2_gene11811	mRNA	640	1
Tp57577_TGAC_v2_mRNA12457	Tp57577_TGAC_v2_gene12062	mRNA	762	1
Tp57577_TGAC_v2_gene17220_novel01	Tp57577_TGAC_v2_gene17220	mRNA	2286	1
Tp57577_TGAC_v2_gene16831_novel01	Tp57577_TGAC_v2_gene16831	mRNA	355	1
Novelgene1675_novel01	Novelgene1675	mRNA	264	1
Tp57577_TGAC_v2_gene27807_novel02	Tp57577_TGAC_v2_gene27807	mRNA	1410	1
Tp57577_TGAC_v2_mRNA23500	Tp57577_TGAC_v2_gene22721	mRNA	385	1
Tp57577_TGAC_v2_mRNA7572	Tp57577_TGAC_v2_gene7319	mRNA	1856	1
Novelgene1140_novel01	Novelgene1140	mRNA	1614	1
Tp57577_TGAC_v2_gene9446_novel02	Tp57577_TGAC_v2_gene9446	mRNA	833	1
Novelgene1447_novel01	Novelgene1447	mRNA	1179	1
Tp57577_TGAC_v2_gene19945_novel02	Tp57577_TGAC_v2_gene19945	mRNA	875	1
Tp57577_TGAC_v2_gene17260_novel01	Tp57577_TGAC_v2_gene17260	mRNA	436	1
Tp57577_TGAC_v2_gene14961_novel02	Tp57577_TGAC_v2_gene14961	mRNA	1362	1
Tp57577_TGAC_v2_mRNA16631	Tp57577_TGAC_v2_gene16083	mRNA	824	1
Tp57577_TGAC_v2_gene6392_novel02	Tp57577_TGAC_v2_gene6392	mRNA	821	1
Tp57577_TGAC_v2_gene8341_novel02	Tp57577_TGAC_v2_gene8341	mRNA	1950	1
Tp57577_TGAC_v2_gene32769_novel02	Tp57577_TGAC_v2_gene32769	mRNA	2001	1
Tp57577_TGAC_v2_mRNA1514	Tp57577_TGAC_v2_gene1492	mRNA	496	1
Tp57577_TGAC_v2_mRNA28070	Tp57577_TGAC_v2_gene27135	mRNA	670	1
Tp57577_TGAC_v2_mRNA18159	Tp57577_TGAC_v2_gene17544	mRNA	1217	1
Tp57577_TGAC_v2_gene12969_novel01	Tp57577_TGAC_v2_gene12969	mRNA	781	1
Tp57577_TGAC_v2_gene6350_novel03	Tp57577_TGAC_v2_gene6350	mRNA	863	1
Tp57577_TGAC_v2_gene13835_novel01	Tp57577_TGAC_v2_gene13835	mRNA	1506	1
Tp57577_TGAC_v2_gene11188_novel04	Tp57577_TGAC_v2_gene11188	mRNA	481	1
Tp57577_TGAC_v2_gene18613_novel01	Tp57577_TGAC_v2_gene18613	mRNA	2495	1
Tp57577_TGAC_v2_gene3321_novel03	Tp57577_TGAC_v2_gene3321	mRNA	463	1
Tp57577_TGAC_v2_gene19687_novel02	Tp57577_TGAC_v2_gene19687	mRNA	469	1
Tp57577_TGAC_v2_gene33638_novel01	Tp57577_TGAC_v2_gene33638	mRNA	476	1
Tp57577_TGAC_v2_gene9732_novel30	Tp57577_TGAC_v2_gene9732	mRNA	1918	1
Tp57577_TGAC_v2_gene6039_novel01	Tp57577_TGAC_v2_gene6039	mRNA	729	1
Tp57577_TGAC_v2_gene4695_novel02	Tp57577_TGAC_v2_gene4695	mRNA	787	1
Tp57577_TGAC_v2_gene14519_novel01	Tp57577_TGAC_v2_gene14519	mRNA	3265	1
Tp57577_TGAC_v2_gene2000_novel04	Tp57577_TGAC_v2_gene2000	mRNA	528	1
Tp57577_TGAC_v2_gene29852_novel03	Tp57577_TGAC_v2_gene29852	mRNA	957	1
Tp57577_TGAC_v2_gene23216_novel01	Tp57577_TGAC_v2_gene23216	mRNA	786	1
Tp57577_TGAC_v2_mRNA23054	Tp57577_TGAC_v2_gene22291	mRNA	448	1
Tp57577_TGAC_v2_mRNA35136	Tp57577_TGAC_v2_gene33989	mRNA	609	1
Tp57577_TGAC_v2_gene18841_novel03	Tp57577_TGAC_v2_gene18841	mRNA	397	1
Tp57577_TGAC_v2_gene31954_novel01	Tp57577_TGAC_v2_gene31954	mRNA	2451	1
Novelgene1343_novel01	Novelgene1343	mRNA	763	1
Tp57577_TGAC_v2_gene10165_novel01	Tp57577_TGAC_v2_gene10165	mRNA	382	1
Tp57577_TGAC_v2_gene5747_novel02	Tp57577_TGAC_v2_gene5747	mRNA	2192	1
Tp57577_TGAC_v2_gene19776_novel02	Tp57577_TGAC_v2_gene19776	mRNA	429	1
Tp57577_TGAC_v2_gene13918_novel01	Tp57577_TGAC_v2_gene13918	mRNA	495	1
Tp57577_TGAC_v2_gene13921_novel01	Tp57577_TGAC_v2_gene13921	mRNA	2769	1
Tp57577_TGAC_v2_gene15788_novel01	Tp57577_TGAC_v2_gene15788	mRNA	2142	1
Tp57577_TGAC_v2_mRNA20405	Tp57577_TGAC_v2_gene19724	mRNA	721	1
Tp57577_TGAC_v2_gene2966_novel01	Tp57577_TGAC_v2_gene2966	mRNA	808	1
Tp57577_TGAC_v2_gene6841_novel01	Tp57577_TGAC_v2_gene6841	mRNA	663	1
Tp57577_TGAC_v2_gene10266_novel01	Tp57577_TGAC_v2_gene10266	mRNA	595	1
Tp57577_TGAC_v2_gene6801_novel01	Tp57577_TGAC_v2_gene6801	mRNA	915	1
Tp57577_TGAC_v2_gene4448_novel01	Tp57577_TGAC_v2_gene4448	mRNA	1731	1
Tp57577_TGAC_v2_gene4884_novel02	Tp57577_TGAC_v2_gene4884	mRNA	1078	1
Tp57577_TGAC_v2_gene5953_novel01	Tp57577_TGAC_v2_gene5953	mRNA	595	1
Tp57577_TGAC_v2_gene12845_novel01	Tp57577_TGAC_v2_gene12845	mRNA	566	1
Tp57577_TGAC_v2_gene4083_novel02	Tp57577_TGAC_v2_gene4083	mRNA	470	1
Tp57577_TGAC_v2_gene3004_novel01	Tp57577_TGAC_v2_gene3004	mRNA	1385	1
Tp57577_TGAC_v2_mRNA34054	Tp57577_TGAC_v2_gene32946	mRNA	1152	1
Tp57577_TGAC_v2_gene22217_novel01	Tp57577_TGAC_v2_gene22217	mRNA	357	1
Tp57577_TGAC_v2_gene8994_novel02	Tp57577_TGAC_v2_gene8994	mRNA	487	1
Tp57577_TGAC_v2_gene22743_novel02	Tp57577_TGAC_v2_gene22743	mRNA	788	1
Tp57577_TGAC_v2_gene37377_novel04	Tp57577_TGAC_v2_gene37377	mRNA	408	1
Tp57577_TGAC_v2_gene37747_novel01	Tp57577_TGAC_v2_gene37747	mRNA	393	1
Tp57577_TGAC_v2_mRNA40817	Tp57577_TGAC_v2_gene39475	mRNA	602	1
Tp57577_TGAC_v2_gene6886_novel01	Tp57577_TGAC_v2_gene6886	mRNA	3220	1
Tp57577_TGAC_v2_gene9545_novel01	Tp57577_TGAC_v2_gene9545	mRNA	1975	1
Tp57577_TGAC_v2_gene37036_novel10	Tp57577_TGAC_v2_gene37036	mRNA	604	1
Tp57577_TGAC_v2_gene28045_novel02	Tp57577_TGAC_v2_gene28045	mRNA	618	1
Tp57577_TGAC_v2_gene4263_novel01	Tp57577_TGAC_v2_gene4263	mRNA	429	1
Tp57577_TGAC_v2_gene34329_novel01	Tp57577_TGAC_v2_gene34329	mRNA	339	1
Tp57577_TGAC_v2_gene13501_novel01	Tp57577_TGAC_v2_gene13501	mRNA	1533	1
Tp57577_TGAC_v2_mRNA21047	Tp57577_TGAC_v2_gene20342	mRNA	525	1
Tp57577_TGAC_v2_gene9294_novel01	Tp57577_TGAC_v2_gene9294	mRNA	1409	1
Tp57577_TGAC_v2_mRNA30593	Tp57577_TGAC_v2_gene29578	mRNA	505	1
Tp57577_TGAC_v2_gene1904_novel06	Tp57577_TGAC_v2_gene1904	mRNA	442	1
Tp57577_TGAC_v2_mRNA18900	Tp57577_TGAC_v2_gene18264	mRNA	972	1
Tp57577_TGAC_v2_mRNA2928	Tp57577_TGAC_v2_gene2847	mRNA	583	1
Tp57577_TGAC_v2_gene36979_novel05	Tp57577_TGAC_v2_gene36979	mRNA	663	1
Tp57577_TGAC_v2_gene35375_novel02	Tp57577_TGAC_v2_gene35375	mRNA	709	1
Tp57577_TGAC_v2_gene31297_novel04	Tp57577_TGAC_v2_gene31297	mRNA	1125	1
Tp57577_TGAC_v2_gene33522_novel03	Tp57577_TGAC_v2_gene33522	mRNA	539	1
Tp57577_TGAC_v2_gene24078_novel01	Tp57577_TGAC_v2_gene24078	mRNA	1344	1
Tp57577_TGAC_v2_gene3782_novel01	Tp57577_TGAC_v2_gene3782	mRNA	1203	1
Tp57577_TGAC_v2_mRNA20893	Tp57577_TGAC_v2_gene20193	mRNA	818	1
Tp57577_TGAC_v2_gene1651_novel02	Tp57577_TGAC_v2_gene1651	mRNA	793	1
Tp57577_TGAC_v2_gene26392_novel01	Tp57577_TGAC_v2_gene26392	mRNA	597	1
Tp57577_TGAC_v2_gene11209_novel01	Tp57577_TGAC_v2_gene11209	mRNA	1595	1
Tp57577_TGAC_v2_mRNA34644	Tp57577_TGAC_v2_gene33514	mRNA	2065	1
Tp57577_TGAC_v2_gene23746_novel02	Tp57577_TGAC_v2_gene23746	mRNA	437	1
Tp57577_TGAC_v2_mRNA23267	Tp57577_TGAC_v2_gene22495	mRNA	685	1
Tp57577_TGAC_v2_gene21456_novel07	Tp57577_TGAC_v2_gene21456	mRNA	563	1
Tp57577_TGAC_v2_gene9327_novel01	Tp57577_TGAC_v2_gene9327	mRNA	978	1
Tp57577_TGAC_v2_gene38762_novel01	Tp57577_TGAC_v2_gene38762	mRNA	1173	1
Novelgene1108_novel01	Novelgene1108	mRNA	539	1
Tp57577_TGAC_v2_gene34177_novel50	Tp57577_TGAC_v2_gene34177	mRNA	728	1
Tp57577_TGAC_v2_gene14245_novel03	Tp57577_TGAC_v2_gene14245	mRNA	413	1
Tp57577_TGAC_v2_gene26943_novel01	Tp57577_TGAC_v2_gene26943	mRNA	668	1
Tp57577_TGAC_v2_gene23308_novel01	Tp57577_TGAC_v2_gene23308	mRNA	608	1
Tp57577_TGAC_v2_mRNA2955	Tp57577_TGAC_v2_gene2874	mRNA	851	1
Tp57577_TGAC_v2_gene12562_novel01	Tp57577_TGAC_v2_gene12562	mRNA	537	1
Tp57577_TGAC_v2_gene11593_novel01	Tp57577_TGAC_v2_gene11593	mRNA	521	1
Tp57577_TGAC_v2_gene2261_novel08	Tp57577_TGAC_v2_gene2261	mRNA	468	1
Tp57577_TGAC_v2_gene37621_novel01	Tp57577_TGAC_v2_gene37621	mRNA	1279	1
Tp57577_TGAC_v2_gene24962_novel01	Tp57577_TGAC_v2_gene24962	mRNA	811	1
Tp57577_TGAC_v2_gene21635_novel03	Tp57577_TGAC_v2_gene21635	mRNA	2534	1
Tp57577_TGAC_v2_gene17762_novel01	Tp57577_TGAC_v2_gene17762	mRNA	2281	1
Novelgene1392_novel01	Novelgene1392	mRNA	2392	1
Tp57577_TGAC_v2_mRNA4712	Tp57577_TGAC_v2_gene4564	mRNA	1450	1
Tp57577_TGAC_v2_mRNA29078	Tp57577_TGAC_v2_gene28126	mRNA	1031	1
Novelgene1647_novel01	Novelgene1647	mRNA	3004	1
Tp57577_TGAC_v2_gene29472_novel03	Tp57577_TGAC_v2_gene29472	mRNA	1216	1
Novelgene1321_novel01	Novelgene1321	mRNA	347	1
Tp57577_TGAC_v2_gene27457_novel01	Tp57577_TGAC_v2_gene27457	mRNA	472	1
Tp57577_TGAC_v2_gene23857_novel01	Tp57577_TGAC_v2_gene23857	mRNA	1237	1
Tp57577_TGAC_v2_gene26250_novel01	Tp57577_TGAC_v2_gene26250	mRNA	627	1
Tp57577_TGAC_v2_gene7596_novel02	Tp57577_TGAC_v2_gene7596	mRNA	1024	1
Novelgene0616_novel01	Novelgene0616	mRNA	467	1
Tp57577_TGAC_v2_gene18151_novel01	Tp57577_TGAC_v2_gene18151	mRNA	514	1
Tp57577_TGAC_v2_gene40032_novel01	Tp57577_TGAC_v2_gene40032	mRNA	591	1
Tp57577_TGAC_v2_gene24328_novel01	Tp57577_TGAC_v2_gene24328	mRNA	364	1
Tp57577_TGAC_v2_mRNA28660	Tp57577_TGAC_v2_gene27718	mRNA	2905	1
Novelgene1532_novel01	Novelgene1532	mRNA	1079	1
Tp57577_TGAC_v2_mRNA3620	Tp57577_TGAC_v2_gene3521	mRNA	604	1
Tp57577_TGAC_v2_gene7612_novel01	Tp57577_TGAC_v2_gene7612	mRNA	1023	1
Tp57577_TGAC_v2_gene38189_novel01	Tp57577_TGAC_v2_gene38189	mRNA	892	1
Tp57577_TGAC_v2_mRNA39695	Tp57577_TGAC_v2_gene38398	mRNA	3439	1
Novelgene0734_novel01	Novelgene0734	mRNA	359	1
Tp57577_TGAC_v2_gene13871_novel02	Tp57577_TGAC_v2_gene13871	mRNA	325	1
Tp57577_TGAC_v2_gene17491_novel01	Tp57577_TGAC_v2_gene17491	mRNA	478	1
Tp57577_TGAC_v2_mRNA8272	Tp57577_TGAC_v2_gene7999	mRNA	1004	1
Tp57577_TGAC_v2_gene5124_novel02	Tp57577_TGAC_v2_gene5124	mRNA	578	1
Tp57577_TGAC_v2_gene31166_novel03	Tp57577_TGAC_v2_gene31166	mRNA	420	1
Tp57577_TGAC_v2_gene15071_novel02	Tp57577_TGAC_v2_gene15071	mRNA	2147	1
Tp57577_TGAC_v2_gene9351_novel02	Tp57577_TGAC_v2_gene9351	mRNA	581	1
Novelgene1297_novel02	Novelgene1297	mRNA	1027	1
Tp57577_TGAC_v2_gene32003_novel01	Tp57577_TGAC_v2_gene32003	mRNA	463	1
Tp57577_TGAC_v2_gene9668_novel01	Tp57577_TGAC_v2_gene9668	mRNA	2769	1
Tp57577_TGAC_v2_gene29045_novel01	Tp57577_TGAC_v2_gene29045	mRNA	590	1
Tp57577_TGAC_v2_gene10538_novel01	Tp57577_TGAC_v2_gene10538	mRNA	1201	1
Novelgene1507_novel01	Novelgene1507	mRNA	1675	1
Tp57577_TGAC_v2_gene14480_novel03	Tp57577_TGAC_v2_gene14480	mRNA	2196	1
Tp57577_TGAC_v2_gene37997_novel03	Tp57577_TGAC_v2_gene37997	mRNA	370	1
Novelgene1509_novel01	Novelgene1509	mRNA	6061	1
Tp57577_TGAC_v2_gene12439_novel01	Tp57577_TGAC_v2_gene12439	mRNA	432	1
Tp57577_TGAC_v2_gene24685_novel03	Tp57577_TGAC_v2_gene24685	mRNA	3027	1
Tp57577_TGAC_v2_gene13753_novel02	Tp57577_TGAC_v2_gene13753	mRNA	2526	1
Tp57577_TGAC_v2_gene9534_novel09	Tp57577_TGAC_v2_gene9534	mRNA	2287	1
Tp57577_TGAC_v2_gene3850_novel01	Tp57577_TGAC_v2_gene3850	mRNA	355	1
Tp57577_TGAC_v2_gene29028_novel01	Tp57577_TGAC_v2_gene29028	mRNA	1274	1
Tp57577_TGAC_v2_mRNA29118	Tp57577_TGAC_v2_gene28165	mRNA	2100	1
Novelgene1313_novel01	Novelgene1313	mRNA	1450	1
Tp57577_TGAC_v2_gene38035_novel01	Tp57577_TGAC_v2_gene38035	mRNA	381	1
Tp57577_TGAC_v2_gene26036_novel01	Tp57577_TGAC_v2_gene26036	mRNA	391	1
Tp57577_TGAC_v2_gene27736_novel01	Tp57577_TGAC_v2_gene27736	mRNA	551	1
Tp57577_TGAC_v2_gene28703_novel03	Tp57577_TGAC_v2_gene28703	mRNA	855	1
Tp57577_TGAC_v2_gene26376_novel01	Tp57577_TGAC_v2_gene26376	mRNA	1140	1
Tp57577_TGAC_v2_gene2447_novel02	Tp57577_TGAC_v2_gene2447	mRNA	692	1
Tp57577_TGAC_v2_mRNA3624	Tp57577_TGAC_v2_gene3525	mRNA	1393	1
Tp57577_TGAC_v2_mRNA1289	Tp57577_TGAC_v2_gene1275	mRNA	928	1
Tp57577_TGAC_v2_gene31101_novel03	Tp57577_TGAC_v2_gene31101	mRNA	1062	1
Novelgene0192_novel01	Novelgene0192	mRNA	430	1
Tp57577_TGAC_v2_gene6722_novel05	Tp57577_TGAC_v2_gene6722	mRNA	620	1
Tp57577_TGAC_v2_gene23981_novel01	Tp57577_TGAC_v2_gene23981	mRNA	746	1
Tp57577_TGAC_v2_gene33141_novel02	Tp57577_TGAC_v2_gene33141	mRNA	513	1
Tp57577_TGAC_v2_gene2069_novel01	Tp57577_TGAC_v2_gene2069	mRNA	516	1
Tp57577_TGAC_v2_gene21030_novel02	Tp57577_TGAC_v2_gene21030	mRNA	520	1
Tp57577_TGAC_v2_mRNA20539	Tp57577_TGAC_v2_gene19855	mRNA	1363	1
Tp57577_TGAC_v2_gene7796_novel06	Tp57577_TGAC_v2_gene7796	mRNA	1345	1
Tp57577_TGAC_v2_gene9242_novel03	Tp57577_TGAC_v2_gene9242	mRNA	457	1
Tp57577_TGAC_v2_mRNA33748	Tp57577_TGAC_v2_gene32648	mRNA	472	1
Tp57577_TGAC_v2_gene4336_novel02	Tp57577_TGAC_v2_gene4336	mRNA	1318	1
Tp57577_TGAC_v2_gene35582_novel01	Tp57577_TGAC_v2_gene35582	mRNA	385	1
Tp57577_TGAC_v2_gene27128_novel05	Tp57577_TGAC_v2_gene27128	mRNA	506	1
Tp57577_TGAC_v2_mRNA9803	Tp57577_TGAC_v2_gene9486	mRNA	1253	1
Novelgene0485_novel03	Novelgene0485	mRNA	413	1
Tp57577_TGAC_v2_gene22448_novel04	Tp57577_TGAC_v2_gene22448	mRNA	529	1
Tp57577_TGAC_v2_gene6404_novel01	Tp57577_TGAC_v2_gene6404	mRNA	595	1
Tp57577_TGAC_v2_mRNA16409	Tp57577_TGAC_v2_gene15869	mRNA	394	1
Tp57577_TGAC_v2_mRNA35103	Tp57577_TGAC_v2_gene33958	mRNA	862	1
Tp57577_TGAC_v2_gene15506_novel15	Tp57577_TGAC_v2_gene15506	mRNA	1766	1
Novelgene1750_novel01	Novelgene1750	mRNA	2102	1
Tp57577_TGAC_v2_mRNA6649	Tp57577_TGAC_v2_gene6423	mRNA	1321	1
Tp57577_TGAC_v2_gene25431_novel05	Tp57577_TGAC_v2_gene25431	mRNA	2912	1
Tp57577_TGAC_v2_gene29437_novel02	Tp57577_TGAC_v2_gene29437	mRNA	1129	1
Tp57577_TGAC_v2_gene21404_novel02	Tp57577_TGAC_v2_gene21404	mRNA	1043	1
Tp57577_TGAC_v2_mRNA5779	Tp57577_TGAC_v2_gene5586	mRNA	776	1
Tp57577_TGAC_v2_gene35603_novel01	Tp57577_TGAC_v2_gene35603	mRNA	3392	1
Tp57577_TGAC_v2_gene21283_novel02	Tp57577_TGAC_v2_gene21283	mRNA	1233	1
Tp57577_TGAC_v2_gene29874_novel01	Tp57577_TGAC_v2_gene29874	mRNA	280	1
Tp57577_TGAC_v2_gene2538_novel03	Tp57577_TGAC_v2_gene2538	mRNA	484	1
Tp57577_TGAC_v2_gene12040_novel03	Tp57577_TGAC_v2_gene12040	mRNA	504	1
Tp57577_TGAC_v2_gene7544_novel03	Tp57577_TGAC_v2_gene7544	mRNA	698	1
Novelgene0131_novel01	Novelgene0131	mRNA	1788	1
Tp57577_TGAC_v2_gene32107_novel01	Tp57577_TGAC_v2_gene32107	mRNA	2910	1
Tp57577_TGAC_v2_gene20269_novel01	Tp57577_TGAC_v2_gene20269	mRNA	424	1
Novelgene1658_novel01	Novelgene1658	mRNA	1374	1
Tp57577_TGAC_v2_gene2919_novel05	Tp57577_TGAC_v2_gene2919	mRNA	448	1
Tp57577_TGAC_v2_gene23464_novel01	Tp57577_TGAC_v2_gene23464	mRNA	1395	1
Tp57577_TGAC_v2_gene33722_novel01	Tp57577_TGAC_v2_gene33722	mRNA	466	1
Tp57577_TGAC_v2_gene28596_novel03	Tp57577_TGAC_v2_gene28596	mRNA	565	1
Tp57577_TGAC_v2_gene355_novel01	Tp57577_TGAC_v2_gene355	mRNA	877	1
Novelgene1365_novel02	Novelgene1365	mRNA	452	1
Tp57577_TGAC_v2_mRNA6904	Tp57577_TGAC_v2_gene6666	mRNA	904	1
Tp57577_TGAC_v2_mRNA9129	Tp57577_TGAC_v2_gene8830	mRNA	696	1
Tp57577_TGAC_v2_gene29805_novel01	Tp57577_TGAC_v2_gene29805	mRNA	1451	1
Tp57577_TGAC_v2_mRNA13762	Tp57577_TGAC_v2_gene13315	mRNA	1041	1
Tp57577_TGAC_v2_mRNA25985	Tp57577_TGAC_v2_gene25126	mRNA	3394	1
Tp57577_TGAC_v2_gene19236_novel02	Tp57577_TGAC_v2_gene19236	mRNA	378	1
Tp57577_TGAC_v2_gene27890_novel02	Tp57577_TGAC_v2_gene27890	mRNA	470	1
Tp57577_TGAC_v2_mRNA26746	Tp57577_TGAC_v2_gene25863	mRNA	1166	1
Tp57577_TGAC_v2_gene34225_novel04	Tp57577_TGAC_v2_gene34225	mRNA	429	1
Tp57577_TGAC_v2_gene37591_novel02	Tp57577_TGAC_v2_gene37591	mRNA	442	1
Tp57577_TGAC_v2_mRNA27723	Tp57577_TGAC_v2_gene26806	mRNA	685	1
Tp57577_TGAC_v2_mRNA9294	Tp57577_TGAC_v2_gene8992	mRNA	3176	1
Tp57577_TGAC_v2_gene2218_novel19	Tp57577_TGAC_v2_gene2218	mRNA	1006	1
Tp57577_TGAC_v2_gene35368_novel01	Tp57577_TGAC_v2_gene35368	mRNA	1446	1
Tp57577_TGAC_v2_gene36657_novel01	Tp57577_TGAC_v2_gene36657	mRNA	518	1
Tp57577_TGAC_v2_mRNA31393	Tp57577_TGAC_v2_gene30365	mRNA	1906	1
Novelgene1176_novel01	Novelgene1176	mRNA	1223	1
Novelgene0696_novel01	Novelgene0696	mRNA	1112	1
Tp57577_TGAC_v2_gene5295_novel01	Tp57577_TGAC_v2_gene5295	mRNA	860	1
Tp57577_TGAC_v2_gene13865_novel03	Tp57577_TGAC_v2_gene13865	mRNA	978	1
Tp57577_TGAC_v2_gene38022_novel03	Tp57577_TGAC_v2_gene38022	mRNA	553	1
Tp57577_TGAC_v2_gene38189_novel02	Tp57577_TGAC_v2_gene38189	mRNA	1774	1
Tp57577_TGAC_v2_mRNA31276	Tp57577_TGAC_v2_gene30250	mRNA	3162	1
Novelgene1361_novel01	Novelgene1361	mRNA	890	1
Tp57577_TGAC_v2_gene9581_novel01	Tp57577_TGAC_v2_gene9581	mRNA	936	1
Tp57577_TGAC_v2_gene15392_novel01	Tp57577_TGAC_v2_gene15392	mRNA	440	1
Novelgene0750_novel01	Novelgene0750	mRNA	2542	1
Tp57577_TGAC_v2_mRNA23882	Tp57577_TGAC_v2_gene23094	mRNA	2145	1
Tp57577_TGAC_v2_mRNA20065	Tp57577_TGAC_v2_gene19393	mRNA	2067	1
Tp57577_TGAC_v2_gene35368_novel03	Tp57577_TGAC_v2_gene35368	mRNA	955	1
Tp57577_TGAC_v2_gene24906_novel05	Tp57577_TGAC_v2_gene24906	mRNA	382	1
Tp57577_TGAC_v2_gene6711_novel01	Tp57577_TGAC_v2_gene6711	mRNA	701	1
Tp57577_TGAC_v2_mRNA14773	Tp57577_TGAC_v2_gene14294	mRNA	939	1
Tp57577_TGAC_v2_gene31972_novel01	Tp57577_TGAC_v2_gene31972	mRNA	556	1
Tp57577_TGAC_v2_gene30498_novel03	Tp57577_TGAC_v2_gene30498	mRNA	1396	1
Tp57577_TGAC_v2_gene22786_novel08	Tp57577_TGAC_v2_gene22786	mRNA	383	1
Tp57577_TGAC_v2_gene38808_novel02	Tp57577_TGAC_v2_gene38808	mRNA	503	1
Novelgene0955_novel01	Novelgene0955	mRNA	635	1
Tp57577_TGAC_v2_gene9967_novel01	Tp57577_TGAC_v2_gene9967	mRNA	1036	1
Tp57577_TGAC_v2_gene13898_novel01	Tp57577_TGAC_v2_gene13898	mRNA	849	1
Novelgene1462_novel01	Novelgene1462	mRNA	454	1
Tp57577_TGAC_v2_gene30220_novel01	Tp57577_TGAC_v2_gene30220	mRNA	301	1
Tp57577_TGAC_v2_gene22756_novel02	Tp57577_TGAC_v2_gene22756	mRNA	453	1
Tp57577_TGAC_v2_gene38275_novel01	Tp57577_TGAC_v2_gene38275	mRNA	997	1
Tp57577_TGAC_v2_gene11541_novel01	Tp57577_TGAC_v2_gene11541	mRNA	624	1
Tp57577_TGAC_v2_mRNA14658	Tp57577_TGAC_v2_gene14181	mRNA	2016	1
Tp57577_TGAC_v2_gene31239_novel06	Tp57577_TGAC_v2_gene31239	mRNA	4692	1
Tp57577_TGAC_v2_gene16714_novel03	Tp57577_TGAC_v2_gene16714	mRNA	325	1
Tp57577_TGAC_v2_gene37766_novel01	Tp57577_TGAC_v2_gene37766	mRNA	431	1
Tp57577_TGAC_v2_gene38335_novel01	Tp57577_TGAC_v2_gene38335	mRNA	438	1
Tp57577_TGAC_v2_gene31723_novel02	Tp57577_TGAC_v2_gene31723	mRNA	879	1
Tp57577_TGAC_v2_gene39070_novel02	Tp57577_TGAC_v2_gene39070	mRNA	3054	1
Tp57577_TGAC_v2_gene3386_novel01	Tp57577_TGAC_v2_gene3386	mRNA	721	1
Tp57577_TGAC_v2_gene12473_novel02	Tp57577_TGAC_v2_gene12473	mRNA	443	1
Tp57577_TGAC_v2_gene26414_novel03	Tp57577_TGAC_v2_gene26414	mRNA	1206	1
Tp57577_TGAC_v2_gene4034_novel01	Tp57577_TGAC_v2_gene4034	mRNA	589	1
Tp57577_TGAC_v2_gene2971_novel01	Tp57577_TGAC_v2_gene2971	mRNA	445	1
Tp57577_TGAC_v2_gene13658_novel01	Tp57577_TGAC_v2_gene13658	mRNA	1187	1
Tp57577_TGAC_v2_gene14526_novel02	Tp57577_TGAC_v2_gene14526	mRNA	768	1
Tp57577_TGAC_v2_gene18900_novel02	Tp57577_TGAC_v2_gene18900	mRNA	506	1
Novelgene1279_novel01	Novelgene1279	mRNA	438	1
Tp57577_TGAC_v2_mRNA28886	Tp57577_TGAC_v2_gene27939	mRNA	937	1
Tp57577_TGAC_v2_gene3341_novel04	Tp57577_TGAC_v2_gene3341	mRNA	768	1
Tp57577_TGAC_v2_gene24131_novel05	Tp57577_TGAC_v2_gene24131	mRNA	598	1
Tp57577_TGAC_v2_gene1200_novel03	Tp57577_TGAC_v2_gene1200	mRNA	466	1
Tp57577_TGAC_v2_mRNA32573	Tp57577_TGAC_v2_gene31513	mRNA	2278	1
Tp57577_TGAC_v2_mRNA6981	Tp57577_TGAC_v2_gene6741	mRNA	1005	1
Novelgene0333_novel01	Novelgene0333	mRNA	715	1
Tp57577_TGAC_v2_gene10538_novel02	Tp57577_TGAC_v2_gene10538	mRNA	706	1
Tp57577_TGAC_v2_gene9839_novel01	Tp57577_TGAC_v2_gene9839	mRNA	310	1
Tp57577_TGAC_v2_gene10916_novel01	Tp57577_TGAC_v2_gene10916	mRNA	416	1
Tp57577_TGAC_v2_gene7568_novel01	Tp57577_TGAC_v2_gene7568	mRNA	1213	1
Tp57577_TGAC_v2_mRNA26840	Tp57577_TGAC_v2_gene25951	mRNA	1277	1
Tp57577_TGAC_v2_gene33443_novel05	Tp57577_TGAC_v2_gene33443	mRNA	396	1
Tp57577_TGAC_v2_gene13163_novel02	Tp57577_TGAC_v2_gene13163	mRNA	1005	1
Tp57577_TGAC_v2_gene16714_novel02	Tp57577_TGAC_v2_gene16714	mRNA	454	1
Tp57577_TGAC_v2_gene9680_novel01	Tp57577_TGAC_v2_gene9680	mRNA	745	1
Tp57577_TGAC_v2_gene36963_novel01	Tp57577_TGAC_v2_gene36963	mRNA	1265	1
Tp57577_TGAC_v2_gene6248_novel01	Tp57577_TGAC_v2_gene6248	mRNA	359	1
Tp57577_TGAC_v2_gene38955_novel01	Tp57577_TGAC_v2_gene38955	mRNA	396	1
Tp57577_TGAC_v2_gene14104_novel03	Tp57577_TGAC_v2_gene14104	mRNA	2728	1
Tp57577_TGAC_v2_mRNA10065	Tp57577_TGAC_v2_gene9734	mRNA	640	1
Novelgene0403_novel01	Novelgene0403	mRNA	1886	1
Tp57577_TGAC_v2_mRNA27168	Tp57577_TGAC_v2_gene26269	mRNA	1212	1
Tp57577_TGAC_v2_mRNA3625	Tp57577_TGAC_v2_gene3526	mRNA	691	1
Novelgene1466_novel01	Novelgene1466	mRNA	3314	1
Tp57577_TGAC_v2_gene1036_novel01	Tp57577_TGAC_v2_gene1036	mRNA	2119	1
Tp57577_TGAC_v2_gene26167_novel02	Tp57577_TGAC_v2_gene26167	mRNA	522	1
Tp57577_TGAC_v2_gene26678_novel01	Tp57577_TGAC_v2_gene26678	mRNA	1330	1
Tp57577_TGAC_v2_mRNA34547	Tp57577_TGAC_v2_gene33421	mRNA	1628	1
Tp57577_TGAC_v2_gene9991_novel01	Tp57577_TGAC_v2_gene9991	mRNA	566	1
Tp57577_TGAC_v2_gene38732_novel18	Tp57577_TGAC_v2_gene38732	mRNA	764	1
Tp57577_TGAC_v2_gene32777_novel01	Tp57577_TGAC_v2_gene32777	mRNA	455	1
Tp57577_TGAC_v2_gene40032_novel02	Tp57577_TGAC_v2_gene40032	mRNA	1857	1
Novelgene0171_novel01	Novelgene0171	mRNA	2971	1
Tp57577_TGAC_v2_gene8435_novel01	Tp57577_TGAC_v2_gene8435	mRNA	551	1
Novelgene1366_novel01	Novelgene1366	mRNA	1011	1
Tp57577_TGAC_v2_gene38929_novel04	Tp57577_TGAC_v2_gene38929	mRNA	714	1
Tp57577_TGAC_v2_gene39244_novel02	Tp57577_TGAC_v2_gene39244	mRNA	983	1
Tp57577_TGAC_v2_gene38501_novel04	Tp57577_TGAC_v2_gene38501	mRNA	372	1
Tp57577_TGAC_v2_gene37490_novel02	Tp57577_TGAC_v2_gene37490	mRNA	2134	1
Tp57577_TGAC_v2_gene35046_novel02	Tp57577_TGAC_v2_gene35046	mRNA	667	1
Tp57577_TGAC_v2_mRNA27884	Tp57577_TGAC_v2_gene26960	mRNA	1003	1
Tp57577_TGAC_v2_gene37246_novel02	Tp57577_TGAC_v2_gene37246	mRNA	2600	1
Tp57577_TGAC_v2_gene27843_novel04	Tp57577_TGAC_v2_gene27843	mRNA	708	1
Tp57577_TGAC_v2_gene20247_novel03	Tp57577_TGAC_v2_gene20247	mRNA	507	1
Tp57577_TGAC_v2_gene19831_novel01	Tp57577_TGAC_v2_gene19831	mRNA	413	1
Tp57577_TGAC_v2_gene37227_novel01	Tp57577_TGAC_v2_gene37227	mRNA	2424	1
Tp57577_TGAC_v2_gene12681_novel01	Tp57577_TGAC_v2_gene12681	mRNA	506	1
Novelgene0646_novel03	Novelgene0646	mRNA	1716	1
Tp57577_TGAC_v2_gene9762_novel01	Tp57577_TGAC_v2_gene9762	mRNA	1519	1
Tp57577_TGAC_v2_gene26754_novel01	Tp57577_TGAC_v2_gene26754	mRNA	1739	1
Tp57577_TGAC_v2_gene19747_novel01	Tp57577_TGAC_v2_gene19747	mRNA	502	1
Novelgene0318_novel01	Novelgene0318	mRNA	1052	1
Tp57577_TGAC_v2_gene40029_novel04	Tp57577_TGAC_v2_gene40029	mRNA	529	1
Tp57577_TGAC_v2_gene33403_novel01	Tp57577_TGAC_v2_gene33403	mRNA	474	1
Tp57577_TGAC_v2_gene20675_novel01	Tp57577_TGAC_v2_gene20675	mRNA	2301	1
Novelgene0075_novel01	Novelgene0075	mRNA	2269	1
Tp57577_TGAC_v2_mRNA7624	Tp57577_TGAC_v2_gene7371	mRNA	490	1
Tp57577_TGAC_v2_gene31174_novel02	Tp57577_TGAC_v2_gene31174	mRNA	672	1
Tp57577_TGAC_v2_gene3575_novel01	Tp57577_TGAC_v2_gene3575	mRNA	878	1
Tp57577_TGAC_v2_gene6288_novel01	Tp57577_TGAC_v2_gene6288	mRNA	1127	1
Tp57577_TGAC_v2_mRNA39646	Tp57577_TGAC_v2_gene38349	mRNA	1014	1
Tp57577_TGAC_v2_mRNA36242	Tp57577_TGAC_v2_gene35047	mRNA	2192	1
Tp57577_TGAC_v2_mRNA3676	Tp57577_TGAC_v2_gene3573	mRNA	641	1
Tp57577_TGAC_v2_gene28951_novel22	Tp57577_TGAC_v2_gene28951	mRNA	2097	1
Tp57577_TGAC_v2_gene3043_novel04	Tp57577_TGAC_v2_gene3043	mRNA	538	1
Tp57577_TGAC_v2_gene15355_novel01	Tp57577_TGAC_v2_gene15355	mRNA	466	1
Tp57577_TGAC_v2_gene26977_novel01	Tp57577_TGAC_v2_gene26977	mRNA	1173	1
Tp57577_TGAC_v2_gene15905_novel03	Tp57577_TGAC_v2_gene15905	mRNA	416	1
Tp57577_TGAC_v2_mRNA26625	Tp57577_TGAC_v2_gene25743	mRNA	1198	1
Tp57577_TGAC_v2_mRNA37619	Tp57577_TGAC_v2_gene36397	mRNA	784	1
Tp57577_TGAC_v2_gene16334_novel02	Tp57577_TGAC_v2_gene16334	mRNA	1678	1
Tp57577_TGAC_v2_mRNA30725	Tp57577_TGAC_v2_gene29709	mRNA	1030	1
Novelgene0531_novel01	Novelgene0531	mRNA	605	1
Tp57577_TGAC_v2_mRNA2293	Tp57577_TGAC_v2_gene2236	mRNA	557	1
Tp57577_TGAC_v2_mRNA962	Tp57577_TGAC_v2_gene956	mRNA	1318	1
Tp57577_TGAC_v2_mRNA27147	Tp57577_TGAC_v2_gene26250	mRNA	1026	1
Tp57577_TGAC_v2_gene15651_novel01	Tp57577_TGAC_v2_gene15651	mRNA	864	1
Novelgene0546_novel01	Novelgene0546	mRNA	414	1
Tp57577_TGAC_v2_gene25100_novel01	Tp57577_TGAC_v2_gene25100	mRNA	2623	1
Tp57577_TGAC_v2_gene28238_novel01	Tp57577_TGAC_v2_gene28238	mRNA	516	1
Tp57577_TGAC_v2_mRNA2216	Tp57577_TGAC_v2_gene2163	mRNA	1325	1
Tp57577_TGAC_v2_mRNA3313	Tp57577_TGAC_v2_gene3221	mRNA	623	1
Tp57577_TGAC_v2_gene39244_novel01	Tp57577_TGAC_v2_gene39244	mRNA	2532	1
Tp57577_TGAC_v2_gene28717_novel02	Tp57577_TGAC_v2_gene28717	mRNA	531	1
Novelgene0760_novel01	Novelgene0760	mRNA	939	1
Tp57577_TGAC_v2_gene24865_novel01	Tp57577_TGAC_v2_gene24865	mRNA	1708	1
Tp57577_TGAC_v2_gene38466_novel02	Tp57577_TGAC_v2_gene38466	mRNA	507	1
Tp57577_TGAC_v2_gene1615_novel01	Tp57577_TGAC_v2_gene1615	mRNA	434	1
Tp57577_TGAC_v2_gene18061_novel03	Tp57577_TGAC_v2_gene18061	mRNA	462	1
Tp57577_TGAC_v2_gene25318_novel01	Tp57577_TGAC_v2_gene25318	mRNA	1987	1
Tp57577_TGAC_v2_gene16126_novel01	Tp57577_TGAC_v2_gene16126	mRNA	525	1
Novelgene1348_novel01	Novelgene1348	mRNA	636	1
Tp57577_TGAC_v2_mRNA13061	Tp57577_TGAC_v2_gene12650	mRNA	2655	1
Tp57577_TGAC_v2_mRNA1380	Tp57577_TGAC_v2_gene1364	mRNA	1069	1
Tp57577_TGAC_v2_gene20660_novel02	Tp57577_TGAC_v2_gene20660	mRNA	3009	1
Tp57577_TGAC_v2_gene28477_novel04	Tp57577_TGAC_v2_gene28477	mRNA	513	1
Tp57577_TGAC_v2_gene28896_novel02	Tp57577_TGAC_v2_gene28896	mRNA	536	1
Tp57577_TGAC_v2_gene25868_novel01	Tp57577_TGAC_v2_gene25868	mRNA	2472	1
Tp57577_TGAC_v2_gene23433_novel01	Tp57577_TGAC_v2_gene23433	mRNA	684	1
Tp57577_TGAC_v2_gene39187_novel01	Tp57577_TGAC_v2_gene39187	mRNA	749	1
Tp57577_TGAC_v2_gene5403_novel04	Tp57577_TGAC_v2_gene5403	mRNA	501	1
Novelgene0109_novel01	Novelgene0109	mRNA	497	1
Tp57577_TGAC_v2_gene21030_novel03	Tp57577_TGAC_v2_gene21030	mRNA	869	1
Tp57577_TGAC_v2_gene30700_novel01	Tp57577_TGAC_v2_gene30700	mRNA	423	1
Tp57577_TGAC_v2_gene11208_novel01	Tp57577_TGAC_v2_gene11208	mRNA	793	1
Tp57577_TGAC_v2_gene36622_novel01	Tp57577_TGAC_v2_gene36622	mRNA	1389	1
Tp57577_TGAC_v2_gene31657_novel01	Tp57577_TGAC_v2_gene31657	mRNA	439	1
Tp57577_TGAC_v2_mRNA24770	Tp57577_TGAC_v2_gene23944	mRNA	697	1
Tp57577_TGAC_v2_gene6060_novel03	Tp57577_TGAC_v2_gene6060	mRNA	1322	1
Novelgene1475_novel01	Novelgene1475	mRNA	1091	1
Tp57577_TGAC_v2_gene18616_novel03	Tp57577_TGAC_v2_gene18616	mRNA	597	1
Tp57577_TGAC_v2_gene5293_novel04	Tp57577_TGAC_v2_gene5293	mRNA	870	1
Novelgene0108_novel01	Novelgene0108	mRNA	2176	1
Tp57577_TGAC_v2_gene504_novel01	Tp57577_TGAC_v2_gene504	mRNA	569	1
Tp57577_TGAC_v2_gene13362_novel05	Tp57577_TGAC_v2_gene13362	mRNA	2375	1
Tp57577_TGAC_v2_gene19241_novel01	Tp57577_TGAC_v2_gene19241	mRNA	866	1
Novelgene0169_novel02	Novelgene0169	mRNA	1119	1
Tp57577_TGAC_v2_gene38966_novel01	Tp57577_TGAC_v2_gene38966	mRNA	558	1
Tp57577_TGAC_v2_mRNA9023	Tp57577_TGAC_v2_gene8729	mRNA	695	1
Tp57577_TGAC_v2_gene2741_novel01	Tp57577_TGAC_v2_gene2741	mRNA	289	1
Tp57577_TGAC_v2_gene17857_novel02	Tp57577_TGAC_v2_gene17857	mRNA	453	1
Tp57577_TGAC_v2_gene13359_novel01	Tp57577_TGAC_v2_gene13359	mRNA	633	1
Tp57577_TGAC_v2_gene38995_novel01	Tp57577_TGAC_v2_gene38995	mRNA	547	1
Tp57577_TGAC_v2_mRNA26479	Tp57577_TGAC_v2_gene25603	mRNA	843	1
Tp57577_TGAC_v2_gene16523_novel01	Tp57577_TGAC_v2_gene16523	mRNA	1770	1
Tp57577_TGAC_v2_gene18218_novel01	Tp57577_TGAC_v2_gene18218	mRNA	991	1
Tp57577_TGAC_v2_gene21763_novel04	Tp57577_TGAC_v2_gene21763	mRNA	519	1
Tp57577_TGAC_v2_gene17782_novel01	Tp57577_TGAC_v2_gene17782	mRNA	614	1
Tp57577_TGAC_v2_gene1535_novel01	Tp57577_TGAC_v2_gene1535	mRNA	912	1
Tp57577_TGAC_v2_gene16400_novel01	Tp57577_TGAC_v2_gene16400	mRNA	678	1
Tp57577_TGAC_v2_gene2123_novel02	Tp57577_TGAC_v2_gene2123	mRNA	1801	1
Tp57577_TGAC_v2_mRNA30705	Tp57577_TGAC_v2_gene29689	mRNA	1916	1
Tp57577_TGAC_v2_gene19616_novel02	Tp57577_TGAC_v2_gene19616	mRNA	1479	1
Tp57577_TGAC_v2_gene8026_novel01	Tp57577_TGAC_v2_gene8026	mRNA	1834	1
Tp57577_TGAC_v2_gene4846_novel02	Tp57577_TGAC_v2_gene4846	mRNA	422	1
Tp57577_TGAC_v2_gene17419_novel01	Tp57577_TGAC_v2_gene17419	mRNA	398	1
Tp57577_TGAC_v2_mRNA2003	Tp57577_TGAC_v2_gene1959	mRNA	1998	1
Tp57577_TGAC_v2_mRNA31428	Tp57577_TGAC_v2_gene30398	mRNA	1606	1
Tp57577_TGAC_v2_gene6904_novel01	Tp57577_TGAC_v2_gene6904	mRNA	476	1
Tp57577_TGAC_v2_gene6037_novel02	Tp57577_TGAC_v2_gene6037	mRNA	580	1
Tp57577_TGAC_v2_mRNA31972	Tp57577_TGAC_v2_gene30928	mRNA	1691	1
[truncated: 37,789 more rows]
