# Supplementary material for: Analysis of transcripts and splice isoforms in red clover (Trifolium pratense L.) by single-molecule long-read sequencing
Source: BMC Plant Biol. 2018 Nov 26;18:300. doi: 10.1186/s12870-018-1534-8 (PMC6258457; doi:10.1186/s12870-018-1534-8)
Supplement: Supplementary file 12 — Table S9. Primers used for RT-PCR validation. (XLSX 19 kb) [file 12870_2018_1534_MOESM12_ESM.xlsx]

## Sheet: Sheet1
Table S9. Primers used for RT-PCR validation
Transcript or gene ID	Primer Names	Primer Seuqneces （5’-3‘）
i0_HQ_c62675/f4p0/1006	1-f	TCTCGCTGGTCAAGTTCATGTTT
	1-r	TAGGGATTTCTAAGGTTTCTTCGTG
i3_LQ_c25970/f1p0/3394	2-f	TTTCTAATGCTTTGTGGCTGCTC
	2-r	CACCCTCCCTCATTCCTTATTCT
i2_HQ_c22922/f2p46/2488	3-f	GGGACGACGGACAGTAAACCAAC
	3-r	ACCGGAGCAGCACCATTCTCAAT
i1_LQ_c86101/f1p0/1505	4-f	GCACCACTCAATCCCAAGGCCAACA
	4-r	GCCCAGCAAGGTCCAACCGAAGA
i2_LQ_c40661/f1p0/2186	5-f	TCCGACCTGCGTGTCTTCCTTAT
	5-r	GCTGCCCATACTTGTTCCATCCC
i2_LQ_c60404/f1p0/2058	6-f	CCGAATATGACATCATGGCACCG
	6-r	TTTGGAGGACCGACAACCACAGG
i0_LQ_c129257/f1p0/896	7-f	CTCACAGTCACGAGAATGCCCAGTT
	7-r	TTGCCAAAGCAGAGCAAGTACCAC
i0_LQ_c8517/f3p0/608	8-f	CCAACAACAACCACCACAGGAAC
	8-r	AGGCCCATTAACCCCATCATACT
i1_HQ_c82285/f12p0/1057	9-f	GTCCTCGCTTCCCTTCTCCTCGTT
	9-r	AAGCTGCTCATGGGTGTTGTGGC
i1_LQ_c24613/f1p2/1285	10-f	CCCCTAAGGACCATTTATACGAC
	10-r	ATCGAGTAAACCACATACGCTCA
Novelgene0860	11-f	TAATGTGGTCCCAGATGTTTGAACAA
	11-r	ATACAAAAGTTGGTTCAAATTTCAA
Tp57577_TGAC_v2_gene10390	12-f	CGATCTTAATAGAAATGGAGATAGC
	12-r	GATGAAGAATTCCTTCGCGTGTTC
Tp57577_TGAC_v2_gene11337	13-f	TTTGTTAATGGTTCCAATAACAAGA
	13-r	CCACATTGAACCAGGTCCAGTT
Tp57577_TGAC_v2_gene11508	14-f	AGAAAACTGGCTAAGATGT
	14-r	ATGACACCATATTAAGCAAATATA
Novelgene0380	15-f	GTTCAATTTGGCCCATGTCCCTC
	15-r	TATTGTTTATACAACACTCTGA
